# Supplementary material for: The conserved RNA helicase YTHDC2 regulates the transition from proliferation to differentiation in the germline
Source: eLife. 2017 Oct 31;6:e26116. doi: 10.7554/eLife.26116 (PMC5703642; doi:10.7554/eLife.26116)
Supplement: Figure 2—source data 1. [file elife-26116-fig2-data1.xlsx]

## Sheet: Sheet2
Figure 2 - Source Data 1.
Figure 2C. Testis weights in adult wild type and Ythdc2-/- mice.
	Weight of Testis
wild type #1	100.4
wild type #2	104.5
wild type #3	100.2
wild type #4	100.3
wild type #5	89.5
wild type #6	97.8
Average weight wild type	98.7833
Standard Deviation	5.03485
	Weight of Testis
Ythdc2-/- #1	26.4
Ythdc2-/- #2	27.3
Ythdc2-/- #3	24.3
Ythdc2-/- #4	25.9
Ythdc2-/- #5	23.5
Ythdc2-/- #6	25.9
Average weight Ythdc2-/-	25.55
Standard Deviation	1.39964
