# Supplementary material for: The conserved RNA helicase YTHDC2 regulates the transition from proliferation to differentiation in the germline
Source: eLife. 2017 Oct 31;6:e26116. doi: 10.7554/eLife.26116 (PMC5703642; doi:10.7554/eLife.26116)
Supplement: Figure 2—source data 2. [file elife-26116-fig2-data2.xlsx]

## Sheet: Number of TUNEL+ Cells
Figure 2 - Source Data 2.
Figure 2L. Number of TUNEL+ cells per tubule cross-section in wild type and Ythdc2-/- testes.
						Number of TUNEL+ cells
	wild type #1	wild type #1	wild type #2	wild type #2	wild type #3	wild type #3	Ythdc2-/- #1	Ythdc2-/- #1	Ythdc2-/- #2	Ythdc2-/- #2	Ythdc2-/- #3	Ythdc2-/- #3
	section 1	section 2	section 1	section 2	section 1	section 2	section 1	section 2	section 1	section 2	section 1	section 2
Average	2.11	2.29	2.45	2.7	2.1	2.5	10.93	13.13	11.06	12	12.45	12.63
wild type AVG	2.35833						Ythdc2-/- AVG	12.0333
SEM	0.0962925						SEM	0.360394
