# Supplementary material for: The conserved RNA helicase YTHDC2 regulates the transition from proliferation to differentiation in the germline
Source: eLife. 2017 Oct 31;6:e26116. doi: 10.7554/eLife.26116 (PMC5703642; doi:10.7554/eLife.26116)
Supplement: Figure 2—source data 3. [file elife-26116-fig2-data3.xlsx]

## Sheet: Sheet1
Figure 2 - Source Data 3.
Figure 2 - Figure Supplement 2E. Percentage of P30 tubule cross-sections containing indicated cell types in wild type and Ythdc2-/- testes.
		Percentage of tubule cross-sections
	Cell w/ Condensed Chromosomes	Apoptotic cell	Metaphase/Anaphase cell
	near preleptotene cell	near preleptotene cell	near preleptotene cell	Leptotene
wild type #1	0	1.59574	0	21.2766
wild type #2	0.505051	2.0202	0	18.6869
wild type #3	0.45045	2.7027	0	24.7748
Average wild type	0.3185	2.10622	0	21.5794
SEM wild type	0.160218	0.322815	0	1.76603
Ythdc2-/- #1	20.4444	19.1111	4.44444	13.3333
Ythdc2-/- #2	18.4834	14.6919	3.79147	9.47867
Ythdc2-/- #3	17.1946	18.0995	3.61991	14.0271
Average Ythdc2-/-	18.7075	17.3009	3.95194	12.2797
SEM Ythdc2-/-	0.945943	1.33833	0.25148	1.41645
