# Supplementary material for: The conserved RNA helicase YTHDC2 regulates the transition from proliferation to differentiation in the germline
Source: eLife. 2017 Oct 31;6:e26116. doi: 10.7554/eLife.26116 (PMC5703642; doi:10.7554/eLife.26116)
Supplement: Figure 3—source data 1. [file elife-26116-fig3-data1.xlsx]

## Sheet: Sheet1
Figure 3 - Source Data 1.
Figure 3I. The most advanced cell stage in P12 wild type and Ythdc2-/- testis tubules.
		wild type #1	wild type #2	wild type #3	Ythdc2-/- #1	Ythdc2-/- #2	Ythdc2-/- #3
	Preleptotene	26.4	12.8	25.4545	84	84	78
Percentage of	Leptotene	19.2	16.8	30.303	16	14	18
tubules	Zygotene	54.4	70.4	44.2424	0	2	4
	Pachytene	0	0	0	0	0	0
				SEM	SEM
		Avg. wild type	Avg. Ythdc2 -/-	wild type	Ythdc2 -/-
	Preleptotene	21.5515	82	4.38946	2.00237
Percentage of	Leptotene	22.101	16	4.16405	1.15607
tubules	Zygotene	56.3475	2	7.62259	1.15607
	Pachytene	0	0	0	0
