# Supplementary material for: The conserved RNA helicase YTHDC2 regulates the transition from proliferation to differentiation in the germline
Source: eLife. 2017 Oct 31;6:e26116. doi: 10.7554/eLife.26116 (PMC5703642; doi:10.7554/eLife.26116)
Supplement: Figure 3—source data 2. [file elife-26116-fig3-data2.xlsx]

## Sheet: Sheet1
Figure 3 - Source Data 2.
Figure 3K. Percentage of P12 wild type and Ythdc2-/- testis tubules containing cells with condensed chromosomes.
		wild type #1	wild type #2	wild type #3	Ythdc2-/- #1	Ythdc2-/- #2	Ythdc2-/- #3
Percentage of	Condensed chromosomes	1.6	0.8	0.606061	21.7143	21.3333	24.5
tubules
				SEM	SEM
		Avg. wild type	Avg. Ythdc2 -/-	wild type	Ythdc2 -/-
Percentage of	Condensed chromosomes	1.00202	22.5159	0.304547	0.999323
tubules
