# Supplementary material for: The conserved RNA helicase YTHDC2 regulates the transition from proliferation to differentiation in the germline
Source: eLife. 2017 Oct 31;6:e26116. doi: 10.7554/eLife.26116 (PMC5703642; doi:10.7554/eLife.26116)
Supplement: Figure 3—source data 3. [file elife-26116-fig3-data3.xlsx]

## Sheet: Sheet2
Figure 3 - Source Data 3.
Figure 3N. Number of chromosomes in Ythdc2-/- metaphase-like nuclei.
	Nuclei with	Nuclei with
Mouse #	40 Chromosomes	39 Chromosomes
Ythdc2-/- #1	5	1
Ythdc2-/- #2	22	0
Ythdc2-/- #3	9	1
Ythdc2-/- #4	37	2
Total	73	4
Percentage (%)	94.8052	5.19481
