# Supplementary material for: The conserved RNA helicase YTHDC2 regulates the transition from proliferation to differentiation in the germline
Source: eLife. 2017 Oct 31;6:e26116. doi: 10.7554/eLife.26116 (PMC5703642; doi:10.7554/eLife.26116)
Supplement: Figure 4—source data 1. [file elife-26116-fig4-data1.xlsx]

## Sheet: DMC1+ cells
Figure 4 - Source Data 1.
Figure 4I. Percentage of tubules containing DMC1+ germ cells in wild type and Ythdc2-/- P12 testes.
	wild type #1	wild type #2	wild type #3	wild type #4	Ythdc2-/- #1	Ythdc2-/- #2	Ythdc2-/- #3	Ythdc2-/- #4
Tubules with DMC1+ cells	93	117	163	130	6	6	15	13
Total number of tubules	171	190	260	242	142	116	120	123
Percentage of tubules with DMC1+ cells	54.386	61.5789	62.6923	53.719	4.22535	5.17241	12.5	10.5691
			SEM	SEM
	Avg. wild type	Avg. Ythdc2 -/-	wild type	Ythdc2 -/-
Percentage of tubules with DMC1+ cells	58.0941	8.11672	2.34839	2.02153
