# Supplementary material for: The conserved RNA helicase YTHDC2 regulates the transition from proliferation to differentiation in the germline
Source: eLife. 2017 Oct 31;6:e26116. doi: 10.7554/eLife.26116 (PMC5703642; doi:10.7554/eLife.26116)
Supplement: Figure 4—source data 2. [file elife-26116-fig4-data2.xlsx]

## Sheet: Sheet2
Figure 4 - Source Data 2.
Figure 4J. Expression of Spo11 mRNA in wild type and Ythdc2-/- testes.
	wild type #1	wild type #2	Ythdc2-/- #1	Ythdc2-/- #2
P10	0.0256906	0.143597	0.0233237	0.0230894
P14	0.783248	1.27673	0.0398033	0.0509607
			SEM	SEM
	Avg. wild type	Avg. Ythdc2 -/-	wild type	Ythdc2 -/-
P10	0.0846438	0.0232066	0.0591293	0.000117519
P14	1.02999	0.045382	0.24748	0.0055954
