# Supplementary material for: The conserved RNA helicase YTHDC2 regulates the transition from proliferation to differentiation in the germline
Source: eLife. 2017 Oct 31;6:e26116. doi: 10.7554/eLife.26116 (PMC5703642; doi:10.7554/eLife.26116)
Supplement: Figure 5—source data 1. [file elife-26116-fig5-data1.xlsx]

## Sheet: Sheet2
Figure 5 - Source Data 1.
Figure 5 - Figure Supplement 1G. Quantification of the number of DDX4+ cells in wild type and Ythdc2-/- P0.5 ovaries.
	Number of DDX4+ Cells
wild type #1	383
wild type #2	216
wild type #3	232
Average Number of DDX4+ cells	277
SEM	53.2639
	Number of DDX4+ Cells
Ythdc2-/- #1	54
Ythdc2-/- #2	114
Ythdc2-/- #3	37
Ythdc2-/- #4	59
Ythdc2-/- #5	152
Average Number of DDX4+ cells	83.2
SEM	21.4736
