# Supplementary material for: The conserved RNA helicase YTHDC2 regulates the transition from proliferation to differentiation in the germline
Source: eLife. 2017 Oct 31;6:e26116. doi: 10.7554/eLife.26116 (PMC5703642; doi:10.7554/eLife.26116)
Supplement: Figure 5—source data 2. [file elife-26116-fig5-data2.xlsx]

## Sheet: % Tubules with TUNEL+ Cells
Figure 5 - Source Data 2.
Figure 5 - Figure Supplement 1L . Percentage of DDX4+ cells that are pH3+ in wild type and Ythdc2-/- E16.5 ovaries
	Percentage of DDX4+ cells that are pH3+	Total number of DDX4+ Cells	Number of DDX4+ Cells that are pH3+
wild type ovary #1	0.236407	423	1
wild type ovary #2	2.24719	178	4
wild type ovary #3	1.64835	364	6
wild type ovary #4	0.60241	332	2
wild type ovary #5	3.9604	202	8
wild type ovary #6	0	161	0
Average	1.44913
SEM	0.612807
	Percentage of DDX4+ cells that are pH3+	Total number of DDX4+ Cells	Number of DDX4+ Cells that are pH3+
Ythdc2-/- ovary #1	30.3448	290	88
Ythdc2-/- ovary #2	10.7981	213	23
Ythdc2-/- ovary #3	23.1343	134	31
Ythdc2-/- ovary #4	9.00474	211	19
Ythdc2-/- ovary #5	9.35252	139	13
Ythdc2-/- ovary #6	8.57143	315	27
Ythdc2-/- ovary #7	21.1268	213	45
Average	16.0475
SEM	3.29804
