# Supplementary material for: The conserved RNA helicase YTHDC2 regulates the transition from proliferation to differentiation in the germline
Source: eLife. 2017 Oct 31;6:e26116. doi: 10.7554/eLife.26116 (PMC5703642; doi:10.7554/eLife.26116)
Supplement: Figure 6—source data 1. [file elife-26116-fig6-data1.xlsx]

## Sheet: P12 - Diff exp transcripts
Figure 6 - Source Data 1. Differentially expressed transcripts in P12 Ythdc2-/- testes compared to wild type.
										Soumillon et al., 2013
Gene ID	baseMean	log2FoldChange	padj	wild type #1	wild type #2	Ythdc2 -/-	Ythdc2 -/-	Spermatogonia	Spermatocytes	Spermatids	Spermatozoa	Sertoli
Ythdc2	1204.21	-1.53234	4.40386e-87	1953.62	1934.38	416.538	512.312	1609.96	2485.33	1664.6	1270.38	781.001
Rad51ap2	368.235	-1.54189	1.40326e-66	696.172	630.133	60.4352	86.2017	10.3829	336.956	759.625	0	14.7081
Hfm1	1181.65	-1.15993	2.08492e-54	1811.88	1676.21	615.51	623.003	136.199	7866.45	4723.86	14.8438	0
Sycp2	5327	-0.906647	5.99146e-54	7450.98	6857.84	3380.65	3618.51	920.411	69454.8	27498.8	181.836	7.35406
uc009fks.1	849.111	-1.18304	1.78842e-45	1305.46	1302.34	345.876	442.763	48.8606	329.041	619.466	14.8438	0
Ccnb3	506.506	-1.20753	6.52915e-43	867.643	750.614	196.182	211.586	90.3921	110.811	519.106	1.23698	1.47081
Mtl5	324.17	-1.19815	4.61771e-40	558.995	520.171	108.783	108.732	21.3765	16634.1	5903.96	16.0807	56.6262
Sycp3	5108.84	-0.735422	2.04327e-39	6706.8	6350.1	3614.96	3763.49	632.134	25090.8	12157.5	17.3177	58.8324
Trim52	536.054	-1.08319	7.53535e-36	824.203	808.942	242.671	268.401	71.4586	1183.87	2920.83	7.42188	9.56027
Smc1b	6055.03	-0.636177	2.75018e-32	7660.18	7346.45	4670.25	4543.22	3462.99	41176.5	66128.9	103.906	66.1865
Ccdc79	382.405	-1.06191	7.74665e-32	618.438	586.148	149.693	175.342	74.5124	8490.61	4163.23	395.833	154.435
Sycp1	7424.7	-0.61768	1.08672e-30	9300.58	8997.8	5866.87	5533.56	3166.78	50292.4	39382.8	56.9011	27.9454
Spata22	244.705	-1.02692	3.19148e-29	429.82	388.215	70.6627	90.12	17.712	1216.66	481.038	0	0
Spo11	196.274	-0.957468	9.26921e-26	352.087	310.764	58.5757	63.6717	32.3701	11070.9	5912.61	13.6068	0
Atr	4756.41	-0.557514	1.37125e-22	5912.32	5623.39	3709.79	3780.14	4788.34	67949.8	21200.3	5965.95	1625.98
Pet2	817.515	-0.806251	1.50368e-20	1209.44	1057.55	457.448	545.618	456.846	237.452	1505.41	2.47396	2.94162
Kctd19	78.007	-0.72659	4.28302e-20	154.324	146.298	6.50841	4.89783	0.610757	57686.2	47550.1	21.0287	0
Spdya	485.933	-0.82751	1.57632e-19	728.18	672.206	243.601	299.747	28.7056	25728.5	17891.8	59.375	19.856
Zfp541	242.394	-0.845899	1.94831e-19	389.81	364.311	110.643	104.813	49.4713	32589.7	36693.8	64.3229	3.67703
Rad21l	382.047	-0.838316	2.91213e-19	525.844	612.922	172.938	216.484	156.965	217.099	399.711	0	13.9727
Setx	4256.65	-0.576096	1.99488e-18	5570.52	4891.9	3345.32	3218.85	10254.6	172959	60754.4	11533.6	3068.85
Iqcb1	2081.27	-0.564881	4.31662e-17	2558.35	2544.44	1636.4	1585.92	1641.1	7215.15	4047.29	1604.36	2017.95
Stag3	3509.83	-0.50272	1.134e-16	4114.16	4270.37	2858.12	2796.66	3373.21	74626.7	70302.5	65.5599	63.2449
Ugt8a	1096.68	-0.651324	1.134e-16	1444.93	1367.36	799.605	774.836	53.1359	130.033	288.969	0	0
Pbx3	458.576	-0.758139	1.19026e-16	617.295	663.6	275.213	278.196	487.995	521.264	657.534	523.242	833.95
Fbxo47	251.882	-0.773437	3.80651e-16	382.952	373.873	129.238	121.466	43.9745	230.668	749.242	284.505	30.887
Meiob	300.341	-0.635535	1.16174e-15	578.428	530.689	33.4718	58.7739	16.4904	1491.43	1257.97	94.0104	4.41243
Zcwpw1	2972.69	-0.508197	1.16168e-14	3698.06	3445.17	2312.35	2435.2	1946.48	2662.86	2380.96	2972.46	208.12
Hspa5	21106.6	-0.376724	2.89586e-14	24570.6	23543.5	18017.1	18295.3	55613.7	78689.4	70442.6	49689.5	85764.5
Sdk1	322.261	-0.724649	3.03314e-14	458.399	463.755	172.938	193.954	602.207	228.406	771.737	1055.14	178.704
Tsga10	321.696	-0.715547	6.8344e-14	469.83	446.543	180.376	190.036	445.242	43445.8	71472.2	3691.15	174.291
2610020H08Rik	1035.88	-0.603661	1.81901e-13	1372.91	1254.53	737.31	778.754	232.699	14518.5	13870.5	526.953	203.707
Hormad1	1271.11	-0.600079	9.93654e-13	1599.25	1632.23	830.287	1022.67	86.7275	6949.43	2931.22	1.23698	0
Dmc1	1727.12	-0.531188	1.17095e-12	2095.37	2122.75	1271.93	1418.41	352.407	751.932	1827.25	40.8203	23.533
1700020N01Rik	115.789	-0.611355	1.25337e-11	206.908	171.159	39.0505	46.0396	58.6327	10397	7300.36	11.1328	7.35406
Fmr1	4706.48	-0.394976	4.23763e-11	5549.94	5290.63	4007.32	3978.01	8371.04	862.743	2758.18	6734.12	6709.84
17-qA3.3-26735	53.9669	-0.476659	7.88524e-11	121.173	83.189	4.64886	6.85696	0.610757	7598.47	2434.61	3.71094	0
Gm364	3478.78	-0.40483	1.21759e-10	4070.72	3980.64	2888.8	2974.94	295.607	720.272	2396.54	0	0
Msh5	182.727	-0.622025	1.63866e-10	276.64	267.735	83.6796	102.854	130.702	1041.4	1247.58	212.76	22.7976
Inca1	312.548	-0.621925	2.72473e-10	421.818	437.938	190.603	199.831	81.2307	1070.8	863.446	466.341	127.225
Cbwd1	1362.29	-0.516923	3.32952e-10	1784.44	1557.64	1023.68	1083.4	2772.23	9327.35	9574.04	1464.58	5107.39
Hspa2	1086.35	-0.514239	5.75415e-10	1384.34	1280.35	827.498	853.201	1412.68	184178	166629	1397.79	3567.45
Gml	85.0013	-0.527134	7.21991e-10	161.183	125.262	24.1741	29.387	7.93984	2938.75	2585.15	1.23698	147.081
Tex16	1160.35	-0.496701	9.66103e-10	1444.93	1375.01	924.194	897.282	374.394	271.374	1053.78	0	0
Acss2	1474.5	-0.464493	1.16418e-09	1774.15	1746.01	1199.41	1178.42	668.168	6672.41	5242.97	2816.6	516.99
Tex12	882.838	-0.522682	1.81345e-09	1130.56	1056.6	690.821	653.37	142.917	1472.2	648.882	1.23698	0
Bub1	3361.36	-0.387722	1.92432e-09	3914.11	3826.7	2914.84	2789.8	1117.08	6070.86	9606.91	70.5078	268.423
Cep290	1206.04	-0.495424	1.92432e-09	1540.95	1394.13	960.455	928.628	3165.55	35401.9	104847	10741.9	1235.48
Sycp1-ps1	825.733	-0.523456	2.72483e-09	1063.12	987.75	636.894	615.167	180.784	3919.09	3713.34	6.1849	0
Adad1	441.172	-0.567462	4.80236e-09	574.999	575.63	313.333	300.726	138.642	19866.8	37709.6	12.3698	1.47081
Brca2	2541.82	-0.396018	2.0875e-08	3009.89	2880.06	2075.25	2202.06	2148.64	8617.25	5462.72	1504.17	374.321
4930447C04Rik	2735.25	-0.391503	4.71512e-08	3252.23	3078.95	2213.79	2396.02	704.203	4104.53	3725.45	1.23698	385.353
Mdc1	2292.84	-0.394563	1.01738e-07	2728.67	2592.25	1852.11	1998.31	3371.99	39705.4	16812.1	10844.6	1663.49
Cdkl2	634.122	-0.494098	1.82579e-07	767.046	806.073	485.341	478.028	568.615	18756.5	16737.7	3266.86	708.196
Phyhipl	300.212	-0.524911	4.11228e-07	389.81	405.427	199.901	205.709	80.0092	16962	74152.5	61.849	62.5095
Ccdc111	778.675	-0.468857	6.32455e-07	997.961	907.43	630.386	578.923	415.926	455.682	853.064	7582.68	876.603
Cntd1	213.944	-0.515072	7.91649e-07	314.363	275.384	135.747	130.282	27.4841	18332.4	7819.46	1756.51	0
Larp1b	1345.35	-0.427956	8.54033e-07	1684.99	1512.7	1037.63	1146.09	1471.92	45292.3	51026.4	3686.2	1817.92
Stxbp5l	133.18	-0.492112	8.64847e-07	188.618	200.801	67.8734	75.4265	76.3447	139.079	744.051	79.1667	2.94162
Acer3	1029.76	-0.428095	1.0364e-06	1193.44	1255.49	842.374	827.732	1835.94	881.965	1027.83	26282.1	3064.43
Stk33	141.627	-0.494356	1.0364e-06	203.479	205.582	78.1009	79.3448	101.996	52076.7	51993.6	89.0625	3.67703
Tc2n	479.65	-0.488825	1.22127e-06	613.866	593.798	370.05	340.889	102.607	490.734	1448.3	337.695	3.67703
Mpp5	1802.05	-0.368448	2.45202e-06	2035.93	2113.19	1556.44	1502.65	4562.97	6508.45	11790.6	12371	3156.36
Nol8	2624.04	-0.342679	4.51872e-06	3053.32	2918.31	2343.03	2181.49	4197.12	66149.7	46681.4	2182.03	3131.36
Msh4	183.409	-0.482203	4.6817e-06	270.924	238.093	104.135	120.486	40.9207	1869.09	2450.18	154.622	0.735406
Dmrtc2	207.222	-0.484832	5.26944e-06	265.208	298.333	130.168	135.18	9.16136	8522.27	6608.21	9.89584	0
Esco2	3112.81	-0.334199	5.81143e-06	3552.88	3504.46	2827.44	2566.46	1472.54	932.848	1043.4	115.039	141.933
Top2a	7394.08	-0.275105	6.54567e-06	8128.86	8201.29	6777.12	6469.05	11509.7	40214.2	28533.5	2480.14	3266.67
Ccdc155	175.347	-0.47072	6.58762e-06	245.775	246.699	86.4689	122.446	40.9207	10590.4	8117.08	115.039	2.20622
Dnajc3	2037.03	-0.373226	7.08814e-06	2510.33	2205.94	1766.57	1665.26	5269	9065.02	4403.75	8128.19	10133.2
1700102P08Rik	64.2492	-0.364688	7.82111e-06	138.32	77.4519	16.7359	24.4891	73.9016	22092.1	3955.58	131.12	42.6535
Gbf1	1411.22	-0.377689	8.45068e-06	1679.27	1597.8	1221.72	1146.09	3011.03	24713.1	22671.1	17124.7	2585.69
Hormad2	318.177	-0.472583	1.0907e-05	436.679	386.303	217.567	232.157	53.7466	1162.38	785.58	70.5078	1.47081
Clec2d	213.182	0.469141	1.3778e-05	142.892	136.736	273.353	299.747	669.39	120.988	22.4946	1126.89	4130.77
Cers3	53.0492	-0.349644	1.53157e-05	104.026	74.5833	13.0168	20.5709	288.888	21000.9	4021.34	388.412	33.0933
Fhl4	100.331	-0.426065	1.60093e-05	150.894	146.298	49.278	54.8556	15.2689	116967	180993	2769.6	79.4238
Rsph1	295.399	-0.466922	1.60382e-05	404.671	362.398	198.042	216.484	713.975	273263	143766	696.419	343.434
Rbpms2	473.362	-0.441387	2.41459e-05	572.713	594.754	363.541	362.439	999.81	289.465	342.61	28.4505	3064.43
Lama5	790.062	0.40677	2.43754e-05	650.446	630.133	916.756	962.912	8002.75	428.545	434.318	695.183	1100.17
Syce2	2045.47	-0.363153	3.8737e-05	2418.88	2311.13	1575.04	1876.85	1063.94	5149.32	25764.9	5608.47	668.484
Prdm9	570.771	-0.425856	3.98853e-05	709.889	679.855	421.187	472.15	107.493	329.041	683.489	3255.73	167.672
Dnpep	1325.5	-0.353895	4.32891e-05	1507.8	1541.39	1119.45	1133.36	1780.97	12727.4	7921.55	6324.68	5723.66
Taf7l	9720.68	-0.271422	4.79868e-05	10985.6	10484.7	8327.98	9084.49	2193.84	1092.28	4216.87	0	22.7976
Ankhd1	2899.28	-0.296281	4.93204e-05	3278.52	3197.52	2526.19	2594.87	8756.43	7347.45	8971.88	28759.8	2082.67
Tex101	3616.55	-0.430064	4.98716e-05	4668.58	4220.65	2573.61	3003.35	548.46	23170.8	11827	4.94792	0
Hsp90b1	27963.4	-0.224705	5.73847e-05	30785.9	29805.6	25321.4	25940.8	51696.9	160216	100970	86406.7	225752
Cox8a	1751.6	0.34929	9.26219e-05	1521.52	1456.29	1872.56	2156.02	985.151	420.63	231.867	1407.68	4383.75
Ccdc36	543.439	-0.414206	9.27615e-05	695.029	625.352	417.468	435.906	273.008	3754.01	1934.53	27.2136	5.88324
Cox7b	1301.83	0.345032	9.53283e-05	1103.13	1116.84	1469.04	1518.33	815.361	226.145	48.4499	854.753	2774.69
Glipr1l2	41.9248	-0.303617	0.000121659	77.7335	64.0651	10.2275	15.673	6.71833	8395.63	2232.15	3.71094	0
Cenpq	981.419	-0.367557	0.000137551	1198.01	1091.98	826.568	809.121	731.687	4008.42	1176.64	231.315	1295.05
Spryd7	845.843	-0.369796	0.000190905	960.237	1019.3	711.276	692.552	710.921	3543.69	3168.27	505.925	1128.85
Ddb2	1256.1	-0.336845	0.000196018	1423.21	1451.51	1087.83	1061.85	411.04	477.166	524.297	3766.6	437.566
Mphosph8	4347.56	-0.265877	0.000226329	4698.3	4895.72	4008.25	3787.98	3423.29	29203.2	5248.16	3365.82	4592.61
Asb1	535.224	-0.39479	0.000243388	652.732	633.958	420.257	433.947	1130.51	7809.91	9494.44	737.24	638.332
Pdcl2	29.8399	-0.260682	0.000288672	51.4413	54.5032	5.57864	7.83652	0.610757	127505	193059	282.031	11.0311
Dopey1	1187.29	-0.335826	0.000292642	1377.48	1342.5	996.717	1032.46	1951.98	4318.24	2507.28	5013.48	613.328
Pabpc1	5042.94	-0.26558	0.000344818	5642.54	5492.39	4730.68	4306.17	80461.2	381946	427222	21582.8	105133
Phtf1	1649.96	-0.306543	0.000398076	1849.6	1869.36	1463.46	1417.43	1650.27	20315.7	17037	2685.48	4699.24
Dnajb11	3043.9	-0.27296	0.000414844	3469.43	3276.88	2678.68	2750.62	8324.62	25772.6	16185.7	8152.93	24455.2
Syce3	252.079	-0.409047	0.000414844	315.506	327.975	174.797	190.036	51.3036	2762.36	7478.58	4.94792	0
Phf7	499.049	-0.389525	0.000461975	632.156	572.761	406.311	384.969	500.21	202140	277580	1168.95	583.912
4930455F23Rik	754.794	-0.362376	0.00061118	933.945	838.584	609.931	636.717	1221.51	86132.9	114970	1457.16	3005.6
Nek1	1689.92	-0.318414	0.000664831	2018.78	1824.42	1530.41	1386.08	2610.99	5851.5	9572.31	4228	1200.18
8-qC5-2209	18.7873	-0.204384	0.000673633	38.8667	34.423	1.85955	0	0	9507.13	1605.77	6.1849	0
Tex15	10240.5	-0.229847	0.00069549	11516	10758.2	9502.28	9185.38	2523.65	3180.73	18530.3	42.0573	69.8635
Smpd3	83.2603	-0.335078	0.000844723	128.032	117.612	32.5421	54.8556	119.098	796.03	5952.41	29.6875	52.2138
Uba6	3894.26	-0.253419	0.000853599	4279.91	4280.89	3628.9	3387.34	3478.26	1299.2	1304.69	3510.55	883.222
Rnpc3	2318.96	-0.276288	0.000928014	2554.92	2599.9	2121.74	1999.29	3166.78	3724.61	2638.79	8860.48	4069.73
H2-D1	278.733	-0.392265	0.0009457	350.944	350.924	188.744	224.32	2482.12	334.694	311.463	5079.04	1751
H2-K1	2095.61	-0.388422	0.0009457	2648.65	2513.84	1443.01	1776.93	7422.53	5507.76	3457.24	10683.8	7189.32
Nptn	4280.92	0.238496	0.00101872	3840.95	3932.83	4720.46	4629.42	6199.19	884.227	3349.96	3560.03	23046.9
Maoa	631.713	-0.360523	0.00109539	740.754	749.658	547.636	488.803	1437.72	225.014	1072.82	907.943	13004.9
4933427G17Rik	60.7968	-0.302868	0.00121951	93.7374	92.751	20.455	36.2439	3.05379	2494.38	11413.4	267.188	25.7392
Fnip1	1898.52	-0.296737	0.0012256	2231.41	2040.52	1729.38	1592.77	2909.04	11121.8	10937.6	4716.6	3159.3
Stk31	2873.24	-0.294098	0.0012256	3174.5	3278.8	2728.88	2310.79	2632.36	24499.4	7284.78	13.6068	10.2957
Iqcg	188.838	-0.383014	0.00125117	250.347	240.005	136.677	128.323	563.729	34776.6	26747.8	628.386	305.929
Hsf2bp	416.505	-0.376995	0.00129594	494.979	515.39	304.966	350.684	421.423	11545.8	7125.59	80.4037	11.0311
Lrrc48	127.795	-0.365715	0.00133846	173.757	173.071	77.1712	87.1813	677.33	30198.3	23664.3	311.719	72.8052
Fmr1nb	851.585	-0.360372	0.00137451	1099.7	916.992	628.527	761.122	105.05	372.008	1694.01	0	30.887
Ccdc152	187.668	-0.378714	0.00146454	246.918	240.961	141.325	121.466	183.838	866.135	1361.79	18.5547	35.2995
Stk25	3375.49	-0.244527	0.00146938	3742.64	3653.62	3017.11	3088.57	4880.56	32896.2	14351.5	11249.1	7071.66
Brdt	931.494	-0.329725	0.00155192	1117.99	1026.95	767.992	813.039	456.236	34111.7	37816.8	304.297	396.384
Zfp672	514.505	-0.3626	0.00155265	597.862	626.308	397.943	435.906	997.367	5416.17	3144.05	2209.25	661.13
Trmt10a	830.7	-0.336596	0.00159068	1008.25	916.036	682.453	716.062	1917.78	22513.9	21587.9	3384.38	1912.79
Swt1	2406.26	-0.273704	0.00160427	2727.53	2622.85	2234.24	2040.43	1810.28	2860.73	11539.7	3185.22	989.856
Spata5	4123.2	-0.241475	0.00169865	4454.81	4568.7	3857.63	3611.66	5988.47	15689.9	12799.4	1391.6	1604.65
Ccna2	2943.99	0.251554	0.00208551	2638.37	2662.05	3336.03	3139.51	1247.17	232.929	411.824	106.38	592.001
Fam63b	693.652	0.337652	0.00208551	570.426	591.885	806.113	806.182	1749.21	877.442	294.16	4651.04	2706.29
Mcmdc2	55.8038	-0.288659	0.00213052	77.7335	92.751	21.3848	31.3461	20.7657	902.318	306.272	21.0287	8.82487
Canx	10008.6	-0.201839	0.0021958	10898.7	10637.7	9364.67	9133.46	24913.4	24094.6	19897.3	63084.7	57658.7
Ppp4r4	503.722	-0.353051	0.00232852	586.43	606.228	413.749	408.479	235.752	9494.69	15251.3	317.904	256.657
Hsp90ab1	32795.4	-0.203431	0.00234705	35722	34893.5	29111.2	31454.8	127846	27404.2	19850.6	88995.7	208577
Hells	10492.2	-0.198435	0.00237199	11380	11166.5	9815.61	9606.59	6194.3	3701.99	3289.4	747.136	957.498
Abca5	936.173	-0.3155	0.00247917	1052.83	1086.24	820.99	784.632	1550.71	6968.66	3929.63	25371.7	635.39
Cdk11b	1882.39	-0.292359	0.00249563	2215.4	2020.44	1547.14	1746.56	9610.27	19953.9	11489.5	9622.46	17861.5
Grk4	200.23	-0.365936	0.00269959	275.497	238.093	140.396	146.935	161.24	21877.3	26072.9	665.495	237.536
4933416C03Rik	486.647	-0.353432	0.00334502	620.725	543.119	364.471	418.274	84.8953	40710.6	30385	42.0573	0
Rbm27	1988.43	-0.26107	0.00334502	2222.26	2177.26	1749.83	1804.36	5425.97	20203.8	23536.2	4539.72	3041.64
Ccdc41	2761.04	-0.243841	0.00355742	3063.61	2993.85	2547.58	2439.12	8092.53	36191.1	102252	6171.29	5743.52
Ddx10	5529.95	-0.233737	0.00357846	6187.81	5885.39	4789.26	5257.33	7590.49	4166.72	5611.53	2175.85	6134.75
Ltv1	1828.43	-0.273529	0.00366766	2030.22	2043.39	1541.56	1698.57	8615.34	9195.05	11861.6	2819.08	14186
Scml2	5590.44	-0.20864	0.00400409	6016.34	6053.68	5204.87	5086.88	3077.61	660.343	2834.32	19.7917	14.7081
D1Pas1	505.25	-0.340942	0.00415264	597.862	592.841	427.696	402.601	649.235	40654.1	40391.6	833.724	5.88324
Tktl2	313.605	-0.356704	0.0041746	369.234	395.865	246.39	242.932	173.455	10437.7	6468.06	0	0
Rpsa	1140.62	-0.289591	0.00460633	1296.32	1272.7	986.489	1006.99	709.089	318.864	316.654	205.339	1937.06
Top2b	3990.91	-0.224394	0.004684	4387.37	4292.36	3733.97	3549.94	22948	3173.94	3638.93	37074.8	22639.5
uc009mlj.1	43.3307	-0.255487	0.00470917	67.4452	67.8899	22.3146	15.673	10.9936	3083.49	1837.63	286.979	3.67703
Paf1	2047.79	-0.271802	0.00485343	2282.85	2279.57	1693.12	1935.62	4255.76	6250.65	12294.2	4688.15	16009.8
Ints6	4014.87	-0.219378	0.00492205	4350.79	4361.21	3735.83	3611.66	4511.05	24380.7	35051.7	5860.81	1684.81
Eaf2	179.813	-0.34897	0.00513292	224.055	237.137	119.941	138.119	131.924	366.355	747.512	456.445	199.295
Pparg	137.025	-0.335405	0.00513292	198.906	166.378	79.9605	102.854	258.961	218.23	264.744	6.1849	406.679
Ift122	796.182	-0.311827	0.00526483	908.796	916.036	653.63	706.266	1302.13	35248.1	31648.1	2998.44	826.596
Ccdc18	612.679	-0.322553	0.00657678	732.752	690.373	529.971	497.619	854.449	5807.4	11043.1	614.779	307.4
Mll1	2757.16	0.239016	0.00703998	2577.78	2409.61	2958.54	3082.69	6202.24	286.073	441.24	9027.48	1147.97
Fgd6	1316.28	-0.271269	0.00742473	1457.5	1479.23	1171.51	1156.87	3366.49	8020.23	6379.81	1265.43	260.334
Mov10l1	2268.66	-0.238387	0.00789404	2474.9	2496.63	2072.46	2030.64	2370.96	7872.1	4327.61	4.94792	0
Hemt1	64.6898	-0.275032	0.00801145	110.885	78.4081	38.1207	31.3461	13.4367	1185	1392.93	2.47396	21.3268
Nabp1	3781.36	-0.219	0.00815901	4181.6	4029.41	3535.93	3378.52	5183.5	3633.02	21972	4627.54	6545.11
Ybx2	307.723	-0.342556	0.00815901	400.099	351.88	221.286	257.626	99.5534	146001	169099	860.938	2.20622
Hdgfrp2	1608.29	-0.289854	0.00817982	1864.46	1770.87	1258.91	1538.9	3971.14	23186.6	24302.8	5456.32	6087.69
Ccdc96	37.6179	-0.232651	0.00872297	66.3021	52.5908	13.9466	17.6322	402.489	68869	105712	127.409	154.435
Por	1098.16	-0.281424	0.00901237	1209.44	1259.31	987.419	936.464	11966	1041.4	1420.62	6460.74	6936.35
BC051142	275.203	-0.339145	0.00946473	360.089	323.194	178.516	239.014	76.3447	77615.2	141664	298.112	55.8908
Tmx4	2265.52	-0.253043	0.00960009	2631.51	2376.15	1957.17	2097.25	2698.33	3885.17	10596.7	4853.91	2270.93
Mt2	2496.86	0.234573	0.00976354	2201.69	2320.69	2779.09	2685.97	5578.05	13136.8	7296.89	2388.61	9242.58
Dzip3	1773.64	-0.263603	0.0103049	2008.5	1937.25	1673.59	1475.22	2686.11	2399.4	2761.64	3265.63	917.051
Gpat2	1259.23	-0.269075	0.0105035	1372.91	1437.16	1128.74	1098.09	610.146	5281.61	1979.52	17.3177	0.735406
H2-Ab1	80.5025	-0.287532	0.0110217	128.032	97.532	46.4886	49.9578	544.795	353.917	771.737	2558.07	340.493
Rnls	121.292	-0.316827	0.0110217	163.469	156.816	85.5391	79.3448	10.3829	10705.7	2524.58	22.2656	30.1516
Ccdc158	221.694	-0.334588	0.0110372	293.787	258.173	168.289	166.526	162.461	22204	35261.1	168.229	91.1903
Taf4b	2086.59	-0.235783	0.0113539	2275.99	2294.87	1897.67	1877.83	2260.41	541.617	1012.26	335.221	247.096
Snx5	4992.8	0.200325	0.0118093	4505.11	4710.22	5391.75	5364.1	6075.81	1900.75	2799.71	13342.1	10459.7
Lrrc42	2861.86	-0.221115	0.0119933	3049.9	3173.61	2617.31	2606.62	3079.44	3345.81	3076.57	404.492	2834.99
Ptp4a3	913.473	0.283935	0.0123358	812.772	779.3	1027.4	1034.42	483.72	352.786	2232.15	178.125	775.853
Parp12	1769.39	-0.24339	0.0128445	1938.76	1954.46	1614.09	1570.24	1481.7	1832.9	1503.68	1672.4	856.747
Smc3	4921.66	-0.195677	0.0129525	5321.31	5260.03	4586.57	4518.73	21942.7	8030.41	36259.5	13943.2	11713.5
Cyld	1436.11	-0.26392	0.0129661	1639.26	1559.56	1212.42	1333.19	10724.9	1348.95	2090.27	11062.3	8257.87
Wdr47	932.08	-0.282577	0.0129661	1075.69	1027.91	830.287	794.427	2009.39	2631.2	4896.9	5180.47	1416.39
Adss	2793.56	-0.218575	0.014247	3007.6	3062.7	2589.42	2514.54	9414.21	21287	18945.6	5510.74	9627.93
Alg6	412.211	0.320957	0.0155639	310.934	359.53	516.024	462.355	191.167	296.25	41.5285	799.089	330.933
Evi5l	323.898	-0.324679	0.0155639	406.958	371.004	248.249	269.38	610.146	4394	7790.05	1211	617.741
Mael	5238.02	-0.199446	0.0158853	5713.41	5570.8	4983.58	4684.28	1814.56	89629.1	114061	71.7448	5.88324
Tpgs2	1136.08	-0.266364	0.0170072	1291.75	1246.88	1032.98	972.708	247.967	10299.8	15434.7	740.951	352.259
Cep76	622.214	0.295997	0.0184396	536.132	526.864	720.574	705.287	902.088	3011.12	3438.21	967.318	970
Zswim4	783.276	-0.299942	0.019109	928.229	875.875	590.406	738.592	7907.47	1666.69	2720.11	1403.97	1382.56
Gdpd1	956.597	0.274008	0.0199068	808.199	866.313	1101.78	1050.09	823.912	6490.36	16891.7	1468.29	1378.89
Fbxo15	134.43	-0.305972	0.0199071	177.187	171.159	85.5391	103.834	50.6929	1079.84	1069.36	3.71094	19.856
Ccdc73	315.993	-0.318288	0.020507	380.665	377.697	271.494	234.116	100.164	6255.17	3640.66	7.42188	0
Gm960	153.866	-0.310728	0.0209865	197.763	194.108	105.064	118.527	20.155	137.948	212.833	2566.73	17.6497
Ly6k	808.134	-0.29773	0.0220823	1035.68	827.109	652.701	717.042	8.5506	6479.05	5743.04	11.1328	847.923
Esf1	3173.92	-0.21838	0.023248	3624.89	3280.71	2873.93	2916.17	10454.9	4323.89	2706.27	3715.89	12176.1
Fabp9	40.2482	-0.216609	0.0237289	65.1589	58.3279	13.0168	24.4891	4.88606	56812.1	88846.7	329.037	11.0311
4930524B15Rik	175.181	-0.307227	0.0248731	236.63	207.494	110.643	145.955	7.32909	7487.66	3526.46	7.42188	0
Ddx43	936.765	-0.268166	0.0253343	1082.55	1019.3	813.551	831.651	338.36	4897.17	1685.36	300.586	92.6611
Atrx	4580.13	0.186627	0.0272179	4227.33	4276.11	4904.55	4912.52	22593.1	807.337	506.993	68228.1	11658.4
Ldhc	28.6716	-0.18926	0.0272179	48.0118	44.9412	14.8764	6.85696	22.598	680129	805811	1124.41	13.2373
Mdh2	3531.13	0.196904	0.0284506	3209.93	3309.39	3807.42	3797.77	12289	2371.13	2522.85	6557.23	20933.3
Top1	6327.91	-0.181798	0.028864	6923.99	6612.09	5812.94	5962.61	27137.8	10635.6	4452.2	19621	11595.9
Setdb1	3069.6	-0.2017	0.0299238	3308.24	3318	2870.21	2781.96	6356.76	11259.8	6163.51	7416.93	2276.82
Ezr	1086.65	0.255175	0.0303805	944.233	983.925	1191.04	1227.39	52152	2559.96	626.387	61659.7	9836.78
Heatr5b	1648.16	-0.231327	0.0304732	1824.45	1789.04	1512.74	1466.41	2064.97	2455.93	2564.38	4632.49	2018.69
17-qA3.3-27363	16.4408	-0.149275	0.031237	34.2942	24.8611	4.64886	1.95913	0	2674.16	1129.92	0	0
Mei1	452.148	-0.299432	0.0323548	492.693	562.243	358.892	394.765	83.6737	602.676	690.41	2.47396	0
Ctcf	2702.71	0.204576	0.0324453	2478.33	2488.98	2899.96	2943.59	4329.05	2580.31	3176.93	5273.24	2832.05
Paip2b	2246.81	-0.213556	0.0324453	2426.88	2452.64	2078.04	2029.66	2391.73	1942.58	7322.85	2648.37	2632.02
Ppfibp1	2605.37	-0.206205	0.0329369	2785.83	2851.38	2395.1	2389.16	21674.6	3492.81	3817.16	5815.04	38914
Odf2l	928.228	-0.260986	0.0334202	1028.83	1047.03	837.725	799.325	3113.64	14183.8	14931.2	11899.7	2604.81
Smc4	6459.92	-0.18842	0.0334202	6930.85	6931.46	6251.79	5725.56	11214.7	157900	81428.6	7293.23	9586.75
Spata4	11.0795	-0.124752	0.0334838	19.4334	23.9049	0	0.979565	3.05379	127403	152200	330.274	30.887
Synj1	965.334	-0.256884	0.0355719	1082.55	1070.94	869.338	838.508	2352.03	3041.65	2607.64	14736.1	1325.2
Ccp110	2426.35	-0.21355	0.0361509	2725.24	2547.31	2243.54	2189.33	1886.02	45348.8	6632.44	4315.82	255.186
Hsp90aa1	5220.48	-0.292354	0.0374826	6600.49	5500.04	4305.78	4475.63	41972.5	134539	103458	12909.1	50635.6
Ero1lb	422.68	-0.293879	0.0387502	475.546	507.74	344.016	363.419	356.682	16198.8	18367.7	864.649	227.24
Spata1	467.527	-0.292977	0.0392867	586.43	501.047	384.926	397.703	319.426	54792.7	86969.2	1145.44	295.633
Zfy2	45.7565	-0.22039	0.039725	60.5864	73.6271	21.3848	27.4278	12.8259	202.4	1316.8	0	0
Lin54	798.454	0.273333	0.040257	747.613	638.739	929.773	877.69	2235.37	3672.59	4130.35	2288.41	1361.24
Ddx4	5612.98	-0.183447	0.046678	5940.89	6082.36	5410.35	5018.31	3920.45	65689.4	73567.7	85.3516	117.665

## Sheet: P12 - all transcripts
Figure 6 - Source Data 1. DESEQ2 results for P12 Ythdc2-/- testes compared to wild type.
Gene ID	baseMean	log2FoldChange	padj
0610005C13Rik	3.4531	-0.00198568	NA
0610007N19Rik	56.0212	0.0724821	0.99991
0610007P14Rik	1172.7	0.0396639	0.99991
0610009B14Rik	0.948827	0.00580227	NA
0610009B22Rik	784.448	0.0467605	0.99991
0610009D07Rik	2091.8	0.051409	0.99991
0610009L18Rik	38.6954	-0.0203452	0.99991
0610009O20Rik	641.688	0.0255556	0.99991
0610010F05Rik	1154.76	0.0831071	0.99991
0610010K14Rik	1395.29	-0.0280395	0.99991
0610011F06Rik	231.431	-0.0359075	0.99991
0610012G03Rik	498.83	0.00526495	0.99991
0610012H03Rik	1.42616	0.0116127	NA
0610030E20Rik	627.453	0.03741	0.99991
0610031J06Rik	506.069	0.0166688	0.99991
0610037L13Rik	581.65	-0.0479099	0.99991
0610038B21Rik	19.8437	0.0389782	0.99991
0610039K10Rik	4.27617	-0.0118745	NA
0610040B10Rik	48.0886	-0.0727139	0.99991
0610040F04Rik	1.29456	-0.0101162	NA
0610040J01Rik	8.23074	0.00404448	0.99991
0610043K17Rik	12.9779	-0.000250116	0.99991
1-qC1.3-637	53.6534	-0.0984354	0.99991
1-qD-2017	2.33101	-0.011338	NA
1-qE2.3-2	2.96561	0.00487948	NA
1-qE3-706	0.57157	-0.00567647	NA
10-qA3-143	63.2987	-0.218518	0.115597
10-qA3-2592	4.32951	-0.018362	NA
10-qB4-6488	31.678	0.0134454	0.99991
10-qB5.1-221	1.24122	-0.00389548	NA
10-qB5.1-5404	2.45983	0.00519031	NA
10-qC1-117	7.63193	-0.0682005	0.589445
10-qC1-12816	57.9726	-0.0313274	0.99991
10-qC1-1527	2.96637	-0.0073664	NA
10-qC1-2617	0.57157	-0.00567647	NA
10-qC1-875	2.22433	0.00166207	NA
11-qB1.3-590	4.24696	0.0067706	NA
11-qE1-252	14.1467	-0.0374756	0.99991
11-qE1-3997	3.42818	-0.0356472	NA
11-qE1-9443	4.26801	-0.0133041	NA
1110001A16Rik	297.403	-0.0190259	0.99991
1110001J03Rik	236.109	-0.0219701	0.99991
1110002L01Rik	277.179	0.0342583	0.99991
1110004E09Rik	742.131	-0.138636	0.99991
1110004F10Rik	1390.02	-0.0575927	0.99991
1110006O24Rik	37.2421	0.041084	0.99991
1110007C09Rik	296.45	0.00896646	0.99991
1110008F13Rik	1169.21	0.0315732	0.99991
1110008J03Rik	180.439	0.0106966	0.99991
1110008L16Rik	446.25	0.0988652	0.99991
1110008P14Rik	484.832	-0.0138285	0.99991
1110012L19Rik	282.284	0.0429844	0.99991
1110017D15Rik	1.28135	0.00185974	NA
1110018G07Rik	1043.2	0.0124633	0.99991
1110020A21Rik	12.8661	0.0388465	0.99991
1110032A03Rik	398.881	-0.00649856	0.99991
1110032F04Rik	36.2564	0.0577249	0.99991
1110034G24Rik	117.624	0.0127853	0.99991
1110035M17Rik	6.16798	-0.00607569	0.99991
1110037F02Rik	2645.37	-0.0750498	0.99991
1110038B12Rik	3.34563	-0.0117002	NA
1110038F14Rik	369.157	0.0431798	0.99991
1110046J04Rik	47.9588	0.0321314	0.99991
1110051M20Rik	298.251	-0.0982413	0.99991
1110054M08Rik	46.6938	0.00884404	0.99991
1110057K04Rik	551.47	-0.13841	0.99991
1110058L19Rik	593.98	0.00813537	0.99991
1110059E24Rik	809.484	0.130347	0.99991
1110059G10Rik	866.975	-0.115765	0.99991
1110065P20Rik	610.36	0.0531524	0.99991
1190002N15Rik	1242.54	0.0689178	0.99991
1190003J15Rik	5.97949	-0.0147517	0.99991
1190003K10Rik	0.48394	-0.000159802	NA
1190005I06Rik	26.1054	-0.0021889	0.99991
1190007I07Rik	186.094	0.132359	0.99991
12-qE-23911	4.52459	-0.0477939	NA
12-qE-7089	3.34563	-0.0117002	NA
1200011I18Rik	929.203	-0.00104249	0.99991
1200014J11Rik	1339.69	0.0428073	0.99991
13-qA3.1-213	25.5487	-0.0905992	0.99991
13-qA3.1-355	2.64554	0.00773193	NA
13-qA5-156	76.6031	0.0797213	0.99991
13-qA5-208	13.5845	0.0138373	0.99991
13-qA5-464	31.2468	-0.0286952	0.99991
13-qA5-703	23.5354	0.0420066	0.99991
13-qB1-1517	26.5463	-0.119527	0.476959
1300002E11Rik	3.16071	0.00684972	NA
1300002K09Rik	9.56417	-0.0286701	0.99991
1300015D01Rik	41.4004	-0.00395536	0.99991
1300017J02Rik	20.8733	-0.0416534	0.99991
1300018J18Rik	288.055	0.0124528	0.99991
14-qA3-19970	15.9105	-0.0907187	0.698072
14-qA3-2286	0.489783	0.00467692	NA
14-qA3-284	1.76021	-0.0160423	NA
14-qA3-3095	3.67384	-0.0429334	NA
14-qC1-1261	0.98972	-0.000676676	NA
15-qD1-17920	6.14306	-0.0404637	0.99991
15-qD1-4001	9.8604	0.0290568	0.99991
15-qD3-14639	12.0148	-0.0893829	0.469575
15-qE1-1119	5.59764	-0.00410951	NA
15-qE1-8387	13.3872	-0.000922794	0.99991
1500002O10Rik	2.25583	-0.0041761	NA
1500004A13Rik	6.05467	-0.0220758	0.99991
1500009C09Rik	0.804013	-0.00366014	NA
1500009L16Rik	1278.57	-0.0368164	0.99991
1500011B03Rik	639.441	0.0256895	0.99991
1500011K16Rik	479.958	-0.00232362	0.99991
1500012F01Rik	684.078	0.105226	0.99991
1500015A07Rik	323.33	0.00744088	0.99991
1500015O10Rik	49.9771	-0.0289262	0.99991
1500016L03Rik	2.68567	0.0144849	NA
1500017E21Rik	3.95533	0.00414276	NA
1500032L24Rik	824.862	-0.0606724	0.99991
1600002H07Rik	388.372	0.134321	0.99991
1600002K03Rik	102.279	0.0523203	0.99991
1600010M07Rik	1.06135	-0.00077303	NA
1600012H06Rik	1759.79	0.0373411	0.99991
1600014C10Rik	231.19	-0.0764647	0.99991
1600014C23Rik	1.95684	0.0117826	NA
1600014K23Rik	1.28211	-0.0102307	NA
1600016N20Rik	122.156	-0.257262	0.104777
1600019K03Rik	0.722989	-0.0027767	NA
1600023N17Rik	27.5841	-0.0307256	0.99991
1600029D21Rik	6.11893	-0.00399779	0.99991
1600029I14Rik	2.41588	0.0111205	NA
1600029O15Rik	6.49263	-0.0330288	0.99991
17-qA3.3-26735	53.9669	-0.476659	7.88524e-11
17-qA3.3-27363	16.4408	-0.149275	0.031237
17-qA3.3-352	7.75769	-0.0523866	0.99991
17-qC-59	0.763883	-0.00894362	NA
17-qE1.1-7037	2.76822	-0.0111289	NA
1700001C19Rik	22.4044	0.0272469	0.99991
1700001G11Rik	10.248	-0.0327235	0.99991
1700001G17Rik	8.46039	0.00180526	0.99991
1700001J03Rik	1.77774	0.00206085	NA
1700001J11Rik	0.775567	0.00233583	NA
1700001K23Rik	0.478098	-0.00494821	NA
1700001L05Rik	0.962038	-0.00536655	NA
1700001L19Rik	8.69057	0.0214633	0.99991
1700001O22Rik	6.37706	0.020994	0.99991
1700001P01Rik	1.71932	-0.00995181	NA
1700003D09Rik	3.15916	-0.00241321	NA
1700003E16Rik	16.0281	-0.0825377	0.880373
1700003F12Rik	5.18486	-0.0114562	NA
1700003G13Rik	0.489783	0.00467692	NA
1700003G18Rik	6.06711	-0.0219277	0.99991
1700003M02Rik	14.6218	0.00129288	0.99991
1700003M07Rik	12.5018	0.0216557	0.99991
1700006A11Rik	4.91582	-0.0575752	NA
1700006H21Rik	0.948827	0.00580227	NA
1700007B14Rik	3.06722	-0.0247953	NA
1700007G11Rik	6.54521	-0.0278604	0.99991
1700007J10Rik	0.477334	0.00530301	NA
1700007K13Rik	19.2996	-0.0343344	0.99991
1700007L15Rik	60.4209	-0.147194	0.740263
1700008I05Rik	7.87714	-0.00327684	0.99991
1700008J07Rik	150.703	-0.0882858	0.99991
1700008K24Rik	1.38219	-0.0153502	NA
1700008O03Rik	11.6562	-0.0032114	0.99991
1700009P17Rik	52.0152	0.0359392	0.99991
1700010B08Rik	2.71996	0.0140249	NA
1700010D01Rik	1.95176	-0.00688561	NA
1700010I14Rik	56.518	-0.0621784	0.99991
1700011E24Rik	0.489783	0.00467692	NA
1700011I03Rik	1.48027	-0.00700055	NA
1700011J10Rik	203.815	0.00180194	0.99991
1700011M02Rik	1205.52	-0.0333629	0.99991
1700012B07Rik	18.0705	-0.0149013	0.99991
1700012B09Rik	2.9158	-0.029274	NA
1700012B15Rik	148.068	-0.0190227	0.99991
1700012D01Rik	45.3272	-0.0233793	0.99991
1700012D14Rik	32.9158	-0.0466008	0.99991
1700013D24Rik	0.489783	0.00467692	NA
1700013F07Rik	3.10074	-0.0148926	NA
1700013G23Rik	20.7379	-0.0524499	0.99991
1700013H16Rik	1762.15	0.0621445	0.99991
1700015F17Rik	9.67519	0.0214682	0.99991
1700015G11Rik	0.769725	-0.00359477	NA
1700016D06Rik	1.3004	-0.00379993	NA
1700016G22Rik	0.48394	-0.000159802	NA
1700016H13Rik	1.18788	0.00265952	NA
1700016K19Rik	102.289	-0.054014	0.99991
1700016L04Rik	5.93783	0.00346738	0.99991
1700017B05Rik	1172.32	-0.0687373	0.99991
1700017D01Rik	2.69304	-0.00348646	NA
1700017N19Rik	0.769725	-0.00359477	NA
1700018B08Rik	13.0808	-0.00171684	0.99991
1700018B24Rik	355.791	-0.0778896	0.99991
1700018G05Rik	644.906	0.0523993	0.99991
1700018L02Rik	5.95967	0.00292399	0.99991
1700019A02Rik	26.4384	-0.0664405	0.99991
1700019B03Rik	6.43853	-0.0149735	0.99991
1700019B21Rik	273.272	-0.177562	0.782017
1700019D03Rik	4.84421	0.0217792	NA
1700019E08Rik	10.3624	-0.00506391	0.99991
1700019G17Rik	182.31	0.00505878	0.99991
1700019G24Rik	1.49856	-0.000456632	NA
1700019L03Rik	1.57374	-0.00779813	NA
1700019N19Rik	0.750671	0.00212774	NA
1700020D05Rik	23.2864	0.0362049	0.99991
1700020L24Rik	1.731	0.00247603	NA
1700020M21Rik	0.530676	-0.00028853	NA
1700020N01Rik	115.789	-0.611355	1.25337e-11
1700021F05Rik	415.53	-0.0830846	0.99991
1700021F07Rik	4.6199	-0.010056	NA
1700021K19Rik	754.682	0.0941108	0.99991
1700021N21Rik	2.20449	-0.00312413	NA
1700022I11Rik	0.57157	-0.00567647	NA
1700023A16Rik	18.9579	-0.00708359	0.99991
1700023E05Rik	0.710541	-0.0028775	NA
1700023F06Rik	10.5368	-0.0390489	0.99991
1700023L04Rik	24.2327	-0.0262173	0.99991
1700024F13Rik	13.2929	0.0112107	0.99991
1700024P16Rik	565.592	-0.125567	0.99991
1700025E21Rik	20.2384	-0.0396468	0.99991
1700025F24Rik	1.93855	0.00512847	NA
1700025G04Rik	689.943	-0.0126694	0.99991
1700025M24Rik	0.763883	-0.00894362	NA
1700025N23Rik	0.763119	0.00254437	NA
1700026D08Rik	74.1414	-0.0273474	0.99991
1700026L06Rik	14.9142	0.0382136	0.99991
1700028B04Rik	5.14981	0.000824932	NA
1700028E10Rik	49.5061	-0.0763051	0.99991
1700028I16Rik	28.5762	0.0409556	0.99991
1700028J19Rik	18.5099	-0.083598	0.826763
1700028K03Rik	75.4809	-0.251608	0.0524835
1700028P14Rik	0.471492	-0.000278439	NA
1700028P15Rik	0.98972	-0.000676676	NA
1700029F12Rik	1.34714	-0.00368238	NA
1700029I15Rik	8.83889	0.0089825	0.99991
1700029J07Rik	154.427	-0.200806	0.507225
1700029M20Rik	1.29456	-0.0101162	NA
1700029P11Rik	60.5719	-0.0843328	0.99991
1700030C10Rik	81.0265	-0.0874627	0.99991
1700030F18Rik	1.03646	-0.000976466	NA
1700030J22Rik	158.183	-0.203627	0.481804
1700030K09Rik	305.771	0.0407743	0.99991
1700030M09Rik	1.03646	-0.000976466	NA
1700031F05Rik	23.9975	0.0727831	0.99991
1700031M16Rik	1.77189	-0.00427434	NA
1700034F02Rik	35.7148	-0.0758544	0.99991
1700034H15Rik	47.4957	0.0745427	0.99991
1700034I23Rik	1.00877	-0.00661646	NA
1700034J05Rik	0.810619	-0.00938034	NA
1700034P13Rik	10.5368	-0.0390489	0.99991
1700037C18Rik	32.8554	-0.0720149	0.99991
1700037H04Rik	678.073	-0.0626926	0.99991
1700039E15Rik	0.489783	0.00467692	NA
1700040L02Rik	164.501	0.0554817	0.99991
1700042O10Rik	3.69215	-0.00483805	NA
1700045H11Rik	0.94959	-0.00546744	NA
1700045I19Rik	695.916	0.0588035	0.99991
1700047E10Rik	1.90502	-0.00566107	NA
1700047M11Rik	0.757277	-0.00370492	NA
1700048O20Rik	329.695	0.0281521	0.99991
1700049E22Rik	0.995563	0.00541052	NA
1700049G17Rik	174.834	0.0293291	0.99991
1700052K11Rik	229.548	-0.0716556	0.99991
1700052N19Rik	592.975	-0.118226	0.99991
1700056E22Rik	9.64903	0.0385587	0.99991
1700057G04Rik	9.10438	0.0165467	0.99991
1700060C20Rik	1.18864	-0.0079313	NA
1700061G19Rik	7.73588	0.0272734	0.99991
1700061I17Rik	0.477334	0.00530301	NA
1700063D05Rik	1.43353	-0.00576744	NA
1700063O14Rik	0.716383	0.0029392	NA
1700064M15Rik	15.8287	-0.033551	0.99991
1700065D16Rik	8.30544	-0.00874166	0.99991
1700065J11Rik	0.471492	-0.000278439	NA
1700066B17Rik	0.57157	-0.00567647	NA
1700066B19Rik	4.73243	-0.0173699	NA
1700066M21Rik	643.62	0.123528	0.99991
1700066O22Rik	0.518228	-0.000370565	NA
1700067G17Rik	1.04306	-0.00714151	NA
1700067K01Rik	48.1234	-0.00295381	0.99991
1700067P10Rik	0.471492	-0.000278439	NA
1700069L16Rik	1.20032	0.00276648	NA
1700073E17Rik	4.18193	0.000896983	NA
1700080O16Rik	91.5553	-0.0902479	0.99991
1700081H04Rik	0.763119	0.00254437	NA
1700084C01Rik	3.74118	0.00735861	NA
1700084E18Rik	20.1722	-0.0404649	0.99991
1700084J12Rik	7.14678	0.017546	0.99991
1700085B03Rik	1.00801	0.00552057	NA
1700086L19Rik	4.71261	0.000471176	NA
1700086O06Rik	104.462	-0.0800357	0.99991
1700088E04Rik	50.2094	-0.0330115	0.99991
1700092C10Rik	1.22801	0.00813289	NA
1700092K14Rik	2.59498	0.0185182	NA
1700092M07Rik	4.93413	0.0277862	NA
1700093K21Rik	8.4515	0.0396535	0.99991
1700094D03Rik	106.053	0.0745095	0.99991
1700095B22Rik	25.8265	0.00869202	0.99991
1700096K18Rik	122.786	0.00594607	0.99991
1700097N02Rik	6.63516	0.0121305	0.99991
1700101E01Rik	16.3007	0.00482421	0.99991
1700101I11Rik	15.8368	0.0158795	0.99991
1700102H20Rik	22.8103	-0.0156604	0.99991
1700102P08Rik	64.2492	-0.364688	7.82111e-06
1700105P06Rik	11.0351	-0.00116162	0.99991
1700106J16Rik	0.954669	0.0109849	NA
1700108F19Rik	13.6889	-0.0102225	0.99991
1700109F18Rik	12.6225	0.0197867	0.99991
1700109G14Rik	0.57157	-0.00567647	NA
1700109H08Rik	13.7598	-0.0310736	0.99991
1700110C19Rik	3.17392	-0.00437331	NA
1700110K17Rik	0.518228	-0.000370565	NA
1700111N16Rik	0.477334	0.00530301	NA
1700112E06Rik	4.64327	0.0133171	NA
1700112H15Rik	22.7473	0.0397217	0.99991
1700113A16Rik	78.3346	0.00252653	0.99991
1700113H08Rik	4.5518	-0.00260218	NA
1700120C14Rik	10.0478	-0.00898041	0.99991
1700120E14Rik	1.67258	-0.00833375	NA
1700123I01Rik	174.757	-0.245528	0.203357
1700123L14Rik	5.08326	0.018557	NA
1700123M08Rik	41.1715	0.0290109	0.99991
1700123O20Rik	724.502	-0.0323997	0.99991
1700125G22Rik	2.96714	-0.0189263	NA
1700125H20Rik	34.6882	-0.155889	0.286692
1700128A07Rik	1.2938	0.00196597	NA
18-qE1-1295	1.34129	-0.0102917	NA
18-qE1-36451	1.58034	-0.0134721	NA
1810006J02Rik	3.29737	0.0113216	NA
1810009A15Rik	634.54	-0.0459864	0.99991
1810010D01Rik	2.68643	0.00220985	NA
1810010H24Rik	29.9505	0.0490737	0.99991
1810011H11Rik	1.00877	-0.00661646	NA
1810011O10Rik	47.7436	0.00744139	0.99991
1810012K16Rik	2.51012	-0.0017974	NA
1810013D10Rik	597.37	0.00307697	0.99991
1810013L24Rik	2063.56	-0.128436	0.756293
1810014B01Rik	118.873	-0.0102602	0.99991
1810019D21Rik	11.3739	0.0396629	0.99991
1810019J16Rik	106.99	-0.0745202	0.99991
1810020O05Rik	4.31275	0.000418928	NA
1810021B22Rik	11.5522	-0.0183294	0.99991
1810022K09Rik	359.949	0.0835967	0.99991
1810024B03Rik	17.846	0.00394008	0.99991
1810026B05Rik	775.02	0.0536294	0.99991
1810026J23Rik	1272.98	-0.084719	0.99991
1810030O07Rik	542.749	0.108892	0.99991
1810032O08Rik	164.78	0.113579	0.99991
1810033B17Rik	0.857354	-0.00840049	NA
1810034E14Rik	70.011	-0.0356405	0.99991
1810035I16Rik	0.530676	-0.00028853	NA
1810037I17Rik	1556.62	-0.0336836	0.99991
1810041L15Rik	23.4264	0.010537	0.99991
1810043G02Rik	170.919	-0.0478663	0.99991
1810043H04Rik	442.244	-0.0459465	0.99991
1810044D09Rik	78.4621	-0.0319706	0.99991
1810053B23Rik	0.717147	-0.00722609	NA
1810055G02Rik	605.471	0.0101353	0.99991
1810058I24Rik	2178.42	0.0210316	0.99991
1810062G17Rik	13.4171	0.0166632	0.99991
1810062O18Rik	32.7266	-0.0873451	0.99991
1810064F22Rik	29.4984	0.0251676	0.99991
19-qC2-1361	1.17543	0.00223884	NA
2-qE1-35981	14.9944	-0.0288808	0.99991
2-qE5-4	430.01	-0.0138825	0.99991
2-qF1-2536	1.48103	-0.0166354	NA
2-qG3-1029	2.10518	-0.0198144	NA
2010001E11Rik	0.48394	-0.000159802	NA
2010001M06Rik	5.0139	-0.00173456	NA
2010002M12Rik	2.6397	0.00235275	NA
2010003K11Rik	7.85348	-0.00817788	0.99991
2010003O02Rik	127.526	-0.0328576	0.99991
2010005H15Rik	3.45616	-0.00121726	NA
2010009K17Rik	1.64692	0.00201439	NA
2010010A06Rik	1.43861	0.0117198	NA
2010012O05Rik	364.265	-0.0492184	0.99991
2010015L04Rik	58.4605	-0.0436209	0.99991
2010016I18Rik	1.21277	0.00253318	NA
2010106E10Rik	0.769725	-0.00359477	NA
2010107E04Rik	3454.62	0.00363966	0.99991
2010107G12Rik	7.37644	0.0147534	0.99991
2010107G23Rik	362.143	0.0850979	0.99991
2010109A12Rik	8.80383	-0.0260112	0.99991
2010109I03Rik	0.996326	-0.00672727	NA
2010111I01Rik	141.619	0.0453555	0.99991
2010204K13Rik	54.7649	-0.0335374	0.99991
2010300C02Rik	141.613	-0.0239767	0.99991
2010308F09Rik	0.489783	0.00467692	NA
2010310C07Rik	1.33545	-0.0154628	NA
2010320M18Rik	261.854	0.115669	0.99991
2200002D01Rik	11.1577	0.0268077	0.99991
2200002J24Rik	61.5124	-0.024069	0.99991
2210013O21Rik	471.204	-0.0157821	0.99991
2210015D19Rik	173.072	-0.021179	0.99991
2210016F16Rik	946.516	0.0190252	0.99991
2210016L21Rik	521.973	-0.0590476	0.99991
2210018M11Rik	969.307	-0.0525962	0.99991
2210019I11Rik	0.48394	-0.000159802	NA
2210039B01Rik	0.961275	0.00591339	NA
2210404J11Rik	149.97	0.027928	0.99991
2210404O07Rik	33.3919	-0.0228515	0.99991
2210404O09Rik	151.252	-0.0607024	0.99991
2210407C18Rik	0.464886	0.00441397	NA
2210408F21Rik	22.1283	-0.0189882	0.99991
2210408I21Rik	242.007	-0.0314119	0.99991
2210409E12Rik	0.750671	0.00212774	NA
2210416O15Rik	4.29446	-0.00584558	NA
2210417A02Rik	6.08743	0.0014706	0.99991
2210417K05Rik	10.2724	0.00323446	0.99991
2300005B03Rik	0.471492	-0.000278439	NA
2300009A05Rik	312.693	0.0196595	0.99991
2310001H17Rik	10.0509	0.0088081	0.99991
2310002F09Rik	0.722226	0.00827268	NA
2310002J15Rik	12.6672	0.00282514	0.99991
2310003H01Rik	302.413	0.0758077	0.99991
2310005G13Rik	17.8218	-0.0380646	0.99991
2310008H04Rik	834.332	-0.0752127	0.99991
2310008H09Rik	2059.64	-0.0170218	0.99991
2310008N11Rik	0.471492	-0.000278439	NA
2310009A05Rik	327.139	-0.0276694	0.99991
2310009B15Rik	177.978	0.00448661	0.99991
2310010J17Rik	229.555	-0.0141664	0.99991
2310011J03Rik	569.673	0.0660369	0.99991
2310014F07Rik	2.02339	-0.00651179	NA
2310014L17Rik	9.05915	0.00654049	0.99991
2310015A10Rik	207.351	0.12388	0.99991
2310015B20Rik	4.04017	-0.00751327	NA
2310022A10Rik	339.825	-0.0354687	0.99991
2310022B05Rik	994.94	-0.0182619	0.99991
2310030A07Rik	4.23451	0.00662041	NA
2310030G06Rik	71.1919	0.0139422	0.99991
2310033P09Rik	600.985	-0.0809456	0.99991
2310034G01Rik	23.9702	-0.0451718	0.99991
2310035C23Rik	2383	0.0254888	0.99991
2310036O22Rik	1399.8	-0.000898103	0.99991
2310039H08Rik	315.109	0.0351103	0.99991
2310039L15Rik	14.288	0.0220099	0.99991
2310040G24Rik	4.33535	-0.012314	NA
2310044G17Rik	872.415	-0.0326362	0.99991
2310045N01Rik	214.092	0.0537677	0.99991
2310047M10Rik	287.616	0.0165085	0.99991
2310050B05Rik	7.73817	-0.00705125	0.99991
2310057M21Rik	491.127	-0.0369735	0.99991
2310061I04Rik	592.137	-0.100665	0.99991
2310061J03Rik	74.0401	-0.0189459	0.99991
2310067B10Rik	448.29	0.031858	0.99991
2310068J16Rik	39.2149	-0.0256127	0.99991
2310069B03Rik	4.95826	-0.00858393	NA
2310069G16Rik	0.955432	-0.000168403	NA
2410002F23Rik	2352.54	0.0262807	0.99991
2410004B18Rik	948.58	-0.0493856	0.99991
2410004I01Rik	6.22256	-0.0156926	0.99991
2410004N09Rik	245.349	0.0351505	0.99991
2410004P03Rik	11.2847	-0.00959826	0.99991
2410006H16Rik	527.875	0.103434	0.99991
2410012E07Rik	1.527	-0.00756976	NA
2410012M07Rik	128.774	0.0822564	0.99991
2410015M20Rik	1048.97	0.0176791	0.99991
2410016O06Rik	467.308	0.0288972	0.99991
2410017I17Rik	0.530676	-0.00028853	NA
2410018L13Rik	7.5583	-0.00425221	0.99991
2410018M08Rik	640.643	-0.0243422	0.99991
2410057H14Rik	0.816461	-0.00355716	NA
2410066E13Rik	115.881	0.113781	0.99991
2410076I21Rik	319.482	0.0331883	0.99991
2410088K16Rik	1.66521	0.00835517	NA
2410089E03Rik	1347.81	-0.132853	0.855898
2410124H12Rik	0.948827	0.00580227	NA
2410127L17Rik	53.4268	-0.029751	0.99991
2410131K14Rik	322.196	0.0914591	0.99991
2410133F24Rik	19.3082	0.0502914	0.99991
2410137F16Rik	7.77169	0.00432763	0.99991
2410137M14Rik	0.477334	0.00530301	NA
2410141K09Rik	1.67766	0.00845837	NA
2500004C02Rik	160.833	0.0387938	0.99991
2510002D24Rik	68.2411	0.0459192	0.99991
2510003D18Rik	2.7164	-0.0265306	NA
2510003E04Rik	1295.43	0.00884007	0.99991
2510009E07Rik	272.016	-0.0011241	0.99991
2510039O18Rik	1050.68	-0.0552751	0.99991
2510049J12Rik	2.24339	-0.00440458	NA
2600006L11Rik	5.30323	-0.0123963	NA
2610001J05Rik	7.82964	0.00865042	0.99991
2610002J02Rik	389.824	-0.0375117	0.99991
2610002M06Rik	1057.32	0.0135484	0.99991
2610005L07Rik	26.707	0.0251235	0.99991
2610008E11Rik	974.538	0.0826417	0.99991
2610015P09Rik	525.119	-0.169586	0.76533
2610016A17Rik	4.74487	-0.0167805	NA
2610017I09Rik	0.722989	-0.0027767	NA
2610018G03Rik	265.256	0.153005	0.99991
2610019E17Rik	200.183	0.0101913	0.99991
2610019F03Rik	2322.44	-0.0587222	0.99991
2610020C07Rik	192.543	-0.0388763	0.99991
2610020H08Rik	1035.88	-0.603661	1.81901e-13
2610027K06Rik	5.24328	3.56812e-05	NA
2610028E06Rik	0.717147	-0.00722609	NA
2610028H24Rik	9.35664	0.00188266	0.99991
2610034B18Rik	103.021	0.0747688	0.99991
2610034M16Rik	4.43927	0.00407326	NA
2610035D17Rik	228.929	-0.031463	0.99991
2610035F20Rik	0.464886	0.00441397	NA
2610044O15Rik8	147.257	0.0391194	0.99991
2610100L16Rik	0.518228	-0.000370565	NA
2610203C20Rik	237.275	0.00789185	0.99991
2610203C22Rik	9.6475	0.0162503	0.99991
2610204G22Rik	31.0901	0.041519	0.99991
2610206C17Rik	42.101	0.0381639	0.99991
2610301B20Rik	723.059	-0.0656874	0.99991
2610301G19Rik	896.841	-0.083796	0.99991
2610305D13Rik	390.347	0.0767483	0.99991
2610306M01Rik	96.2196	-0.0719848	0.99991
2610307P16Rik	93.1525	0.111261	0.99991
2610316D01Rik	3.39545	0.0233096	NA
2610318N02Rik	44.7053	-0.128227	0.75645
2610507B11Rik	5009.23	0.072269	0.99991
2610507I01Rik	384.373	0.0339511	0.99991
2610524H06Rik	634.251	0.102114	0.99991
2610528A11Rik	2.19665	-0.00384898	NA
2700029M09Rik	1599.7	0.0591993	0.99991
2700038G22Rik	1.00217	-0.000627813	NA
2700046A07Rik	95.3956	0.00413101	0.99991
2700046G09Rik	123.524	0.0387371	0.99991
2700049A03Rik	553.091	0.0100031	0.99991
2700050L05Rik	1894.48	0.0862189	0.99991
2700054A10Rik	21.0273	0.0143243	0.99991
2700060E02Rik	1333.22	-0.0464168	0.99991
2700062C07Rik	238.817	-0.0538861	0.99991
2700070H01Rik	20.0332	0.0330566	0.99991
2700081L22Rik	7.65532	-0.0110849	0.99991
2700081O15Rik	472.582	0.0395763	0.99991
2700086A05Rik	0.728831	0.00270369	NA
2700089E24Rik	1824.66	-0.033305	0.99991
2700089I24Rik	0.48394	-0.000159802	NA
2700094K13Rik	1619.56	0.0477667	0.99991
2700097O09Rik	335.82	0.00132967	0.99991
2700099C18Rik	489.962	-0.0172446	0.99991
2810001G20Rik	320.022	0.00942644	0.99991
2810002D19Rik	157.441	-0.0879	0.99991
2810004N23Rik	1556.3	-0.110022	0.99991
2810006K23Rik	327.58	-0.0206657	0.99991
2810007J24Rik	0.477334	0.00530301	NA
2810011L19Rik	24.7852	-0.0269515	0.99991
2810013P06Rik	415.278	-0.0768067	0.99991
2810021J22Rik	590.993	0.193904	0.478987
2810025M15Rik	575.682	-0.0910145	0.99991
2810029C07Rik	92.8597	-0.10431	0.99991
2810032G03Rik	17.5901	-0.021408	0.99991
2810055G20Rik	32.2111	-0.0382261	0.99991
2810403A07Rik	2328.56	0.0614213	0.99991
2810403D21Rik	59.757	0.00442542	0.99991
2810407C02Rik	3145.29	0.0197738	0.99991
2810408A11Rik	85.7397	0.0056353	0.99991
2810408M09Rik	291.202	0.0862986	0.99991
2810410L24Rik	38.9886	-0.00948757	0.99991
2810417H13Rik	200.673	0.00937754	0.99991
2810428I15Rik	517.53	0.0491429	0.99991
2810433D01Rik	14.6147	0.0445451	0.99991
2810442I21Rik	22.1898	0.0681362	0.99991
2810442N19Rik	0.477334	0.00530301	NA
2810454H06Rik	57.2496	-0.0290363	0.99991
2810459M11Rik	11.3302	0.0419022	0.99991
2810468N07Rik	139.179	-0.0177523	0.99991
2810474O19Rik	1206.7	0.0776702	0.99991
2900002K06Rik	15.0676	-0.0201605	0.99991
2900005J15Rik	19.2577	0.0306405	0.99991
2900008C10Rik	6.12277	0.0185356	0.99991
2900009J06Rik	20.1696	-0.0332381	0.99991
2900011O08Rik	11.7768	0.00836504	0.99991
2900026A02Rik	168.491	0.0868887	0.99991
2900041M22Rik	25.0133	-0.00719202	0.99991
2900052N01Rik	1.54529	-0.000840864	NA
2900055J20Rik	2.11765	0.0128545	NA
2900056M20Rik	341.655	0.01952	0.99991
2900060B14Rik	26.5309	-0.0126687	0.99991
2900076A07Rik	58.5414	0.0351155	0.99991
2900092D14Rik	0.489783	0.00467692	NA
2900093L17Rik	11.8975	0.00619312	0.99991
2900097C17Rik	561.356	-0.0881441	0.99991
3-qA2-617	23.6654	-0.00523539	0.99991
3-qA3-2052	0.478098	-0.00494821	NA
3000002C10Rik	57.0309	-0.0746051	0.99991
3010001F23Rik	8.37047	-0.00396092	0.99991
3010026O09Rik	297.145	0.16536	0.903857
3010033K07Rik	4.0173	0.00792309	NA
3110001D03Rik	585.917	-0.0606662	0.99991
3110001I22Rik	172.021	0.0460217	0.99991
3110002H16Rik	880.011	0.00251478	0.99991
3110007F17Rik	3.25063	0.0132153	NA
3110009E18Rik	120.092	-0.0347785	0.99991
3110021A11Rik	9.32514	0.00733091	0.99991
3110021N24Rik	17.6395	-0.0268383	0.99991
3110035E14Rik	965.39	-0.0231089	0.99991
3110039M20Rik	0.524834	-0.00615917	NA
3110040N11Rik	144.361	0.0228673	0.99991
3110043O21Rik	1654.61	0.010952	0.99991
3110045C21Rik	91.5614	-0.0402824	0.99991
3110047P20Rik	0.98972	-0.000676676	NA
3110052M02Rik	198.381	0.0165923	0.99991
3110056K07Rik	4.17533	0.00680143	NA
3110057O12Rik	166.611	-0.141862	0.99991
3110062M04Rik	118.709	0.0600829	0.99991
3110070M22Rik	12.216	0.025154	0.99991
3110082I17Rik	358.819	-0.0329379	0.99991
3110082J24Rik	7.8009	-0.0138006	0.99991
3110099E03Rik	5.10968	-0.00440757	NA
3230401D17Rik	91.5861	0.020819	0.99991
3300002I08Rik	19.4375	-0.00381286	0.99991
3300005D01Rik	0.464886	0.00441397	NA
3425401B19Rik	0.763119	0.00254437	NA
3632451O06Rik	82.3953	-0.0348417	0.99991
3632454L22Rik	106.01	-0.0992953	0.99991
3830403N18Rik	180.837	-0.206351	0.479486
3830406C13Rik	749.965	-0.0656532	0.99991
3830408C21Rik	58.7841	-0.0751452	0.99991
3830417A13Rik	45.0028	-0.0906642	0.99991
3930402G23Rik	12.5661	-0.0391458	0.99991
4-qB3-277	1.70687	-0.00918678	NA
4-qB3-3994	3.72057	-0.0430545	NA
4-qB3-639	3.92457	-0.0345601	NA
4-qC5-17839	7.69269	0.0212371	0.99991
4-qD2.2-2182	1.2938	0.00196597	NA
4-qD2.2-349	36.0628	0.000672541	0.99991
4430402I18Rik	31.8329	-0.0185718	0.99991
4632415K11Rik	145.486	-0.0355895	0.99991
4632415L05Rik	257.615	0.0570518	0.99991
4632427E13Rik	25.1075	-0.0187638	0.99991
4632428C04Rik	8.78352	-0.00117494	0.99991
4632428N05Rik	136.443	0.0898003	0.99991
4632434I11Rik	784.579	-0.0163704	0.99991
4732415M23Rik	214.656	-0.099939	0.99991
4732416N19Rik	17.9448	0.00233497	0.99991
4732456N10Rik	0.518228	-0.000370565	NA
4732471J01Rik	26.365	-0.0760188	0.99991
4732490B19Rik	5.81209	0.0213367	0.99991
4732491K20Rik	121.369	0.107837	0.99991
4831440E17Rik	159.05	-0.110861	0.99991
4833403I15Rik	101.609	-0.030181	0.99991
4833412C05Rik	5.53186	0.00152081	NA
4833417C18Rik	58.311	-0.0679106	0.99991
4833418N02Rik	31.2225	-0.0651546	0.99991
4833419F23Rik	25.2625	0.00918766	0.99991
4833420G17Rik	1590.37	0.0925568	0.99991
4833422C13Rik	7.95156	0.00162623	0.99991
4833424O15Rik	77.6753	-0.074839	0.99991
4833427G06Rik	2.3968	-0.0162229	NA
4833428L15Rik	0.518228	-0.000370565	NA
4833439L19Rik	1896.95	0.0794731	0.99991
4921501E09Rik	3.0065	-0.00178653	NA
4921506M07Rik	8.14308	-0.0219491	0.99991
4921507L20Rik	0.524834	-0.00615917	NA
4921507P07Rik	218.892	-0.0409596	0.99991
4921508A21Rik	0.98972	-0.000676676	NA
4921508D12Rik	0.48394	-0.000159802	NA
4921511C20Rik	0.489783	0.00467692	NA
4921511I17Rik	1.20617	0.00874413	NA
4921517D22Rik	0.524834	-0.00615917	NA
4921524J17Rik	799.393	-0.0647219	0.99991
4921524L21Rik	0.471492	-0.000278439	NA
4921530D09Rik	8.43042	0.0311933	0.99991
4921530L18Rik	23.6705	-0.0520484	0.99991
4921531C22Rik	177.871	-0.0672473	0.99991
4921531P14Rik	35.1245	0.0167625	0.99991
4921533I20Rik	10.7249	0.0402323	0.99991
4921536K21Rik	18.6048	-0.0217912	0.99991
4921539E11Rik	2.33762	-0.0177172	NA
4922501C03Rik	815.952	-0.0100138	0.99991
4922501L14Rik	4.19514	-0.0109957	NA
4922502D21Rik	4.5833	-0.0529704	NA
4922502N22Rik	4.12657	-0.008685	NA
4930402F11Rik	0.57157	-0.00567647	NA
4930402H24Rik	1029.37	0.00739952	0.99991
4930402K13Rik	0.710541	-0.0028775	NA
4930404A10Rik	21.3521	-0.0957528	0.737635
4930404H11Rik	0.489783	0.00467692	NA
4930404I05Rik	3.47723	0.0103388	NA
4930404N11Rik	1.81279	-0.0111012	NA
4930405A21Rik	17.6326	-0.0501498	0.99991
4930407I10Rik	0.518228	-0.000370565	NA
4930408F14Rik	0.48394	-0.000159802	NA
4930412C18Rik	42.5636	0.0644095	0.99991
4930413F20Rik	1.80618	-0.00468734	NA
4930413G21Rik	19.6544	0.0109635	0.99991
4930414L22Rik	86.1253	-0.0233763	0.99991
4930415F15Rik	9.81337	0.00339651	0.99991
4930415O20Rik	0.763883	-0.00894362	NA
4930417O22Rik	5.55091	-0.00384392	NA
4930419G24Rik	0.57157	-0.00567647	NA
4930422G04Rik	672.583	-0.145009	0.955574
4930425O10Rik	7.82148	-0.0436531	0.99991
4930426D05Rik	28.1003	-0.00244865	0.99991
4930426L09Rik	12.0276	0.0504275	0.99991
4930427A07Rik	287.643	-0.0396679	0.99991
4930428G15Rik	0.804013	-0.00366014	NA
4930429B21Rik	5.05558	0.0125654	NA
4930429D17Rik	1.28795	-0.00430757	NA
4930429F24Rik	17.7337	-0.114608	0.346468
4930430D24Rik	8.48071	0.023884	0.99991
4930430F08Rik	590.984	0.0419441	0.99991
4930432J09Rik	1.2938	0.00196597	NA
4930432K21Rik	238.47	-0.279071	0.0884652
4930441O14Rik	8.64534	0.0168952	0.99991
4930442L01Rik	0.57157	-0.00567647	NA
4930443O20Rik	1.18711	0.0136058	NA
4930444A02Rik	324.026	-0.0292195	0.99991
4930444P10Rik	0.757277	-0.00370492	NA
4930447C04Rik	2735.25	-0.391503	4.71512e-08
4930447N08Rik	1.0489	-0.000965067	NA
4930448K20Rik	1.0489	-0.000965067	NA
4930451C15Rik	12.2623	0.0179246	0.99991
4930451G09Rik	77.0323	-0.0365403	0.99991
4930451I11Rik	0.530676	-0.00028853	NA
4930452B06Rik	301.399	-0.00963362	0.99991
4930452G13Rik	5.04895	-0.0131335	NA
4930452N14Rik	1.18864	-0.0079313	NA
4930453N24Rik	587.93	-0.0828147	0.99991
4930455B14Rik	0.98972	-0.000676676	NA
4930455D15Rik	2.24415	-0.0166259	NA
4930455F23Rik	754.794	-0.362376	0.00061118
4930465K10Rik	2.7959	-0.00515874	NA
4930467D21Rik	19.6961	-0.0511451	0.99991
4930467K11Rik	1.47366	-0.000758615	NA
4930470P17Rik	5.05173	-0.0094242	NA
4930471G03Rik	0.48394	-0.000159802	NA
4930471M09Rik	4.40422	0.0165218	NA
4930473A02Rik	1.20693	-0.00260243	NA
4930474G06Rik	0.518228	-0.000370565	NA
4930474N09Rik	1.99849	-0.00754079	NA
4930478P22Rik	1.05551	-0.00702932	NA
4930479D17Rik	3.88878	0.0222401	NA
4930479M11Rik	47.7906	0.003823	0.99991
4930480G23Rik	0.477334	0.00530301	NA
4930481A15Rik	47.8217	-0.00668709	0.99991
4930483J18Rik	3.7112	-0.0109979	NA
4930483O08Rik	0.524834	-0.00615917	NA
4930486L24Rik	361.139	-0.0745991	0.99991
4930488L21Rik	0.477334	0.00530301	NA
4930500J02Rik	2.18928	0.0146782	NA
4930500L23Rik	3.16271	-0.00122076	NA
4930502E09Rik	2.25862	0.000940658	NA
4930502E18Rik	354.17	0.0206223	0.99991
4930503B20Rik	4.75072	-0.0107981	NA
4930503E14Rik	8.73297	0.0101156	0.99991
4930503E24Rik	131.797	-0.0018076	0.99991
4930503L19Rik	331.106	0.0599252	0.99991
4930504O13Rik	24.0805	-0.0185355	0.99991
4930505A04Rik	1.00293	-0.0115922	NA
4930506C21Rik	8.06869	0.00567068	0.99991
4930506M07Rik	2200.84	-0.0485684	0.99991
4930507D05Rik	17.5566	-0.0325202	0.99991
4930509E16Rik	14.2861	-0.0605455	0.99991
4930509K18Rik	0.471492	-0.000278439	NA
4930511E03Rik	2.00434	-0.00121296	NA
4930511M06Rik	20.8321	-0.0191613	0.99991
4930511M11Rik	0.763883	-0.00894362	NA
4930513N10Rik	35.3243	-0.0930987	0.99991
4930513O06Rik	0.750671	0.00212774	NA
4930515G01Rik	17.1723	0.0322671	0.99991
4930515G16Rik	1.20032	0.00276648	NA
4930518P08Rik	0.471492	-0.000278439	NA
4930519F09Rik	26.8663	0.0189891	0.99991
4930519F16Rik	0.471492	-0.000278439	NA
4930520O04Rik	26.6305	0.0274866	0.99991
4930523C07Rik	150.405	0.0114153	0.99991
4930524B15Rik	175.181	-0.307227	0.0248731
4930524L23Rik	24.2954	-0.063609	0.99991
4930525D18Rik	2.94656	0.0108455	NA
4930525G20Rik	13.1768	-0.00800476	0.99991
4930526D03Rik	0.48394	-0.000159802	NA
4930526L06Rik	1.47366	-0.000758615	NA
4930527F14Rik	1.21277	0.00253318	NA
4930528A17Rik	28.7681	-0.123686	0.580428
4930529C04Rik	0.471492	-0.000278439	NA
4930529M08Rik	21.2546	-0.0308775	0.99991
4930538K18Rik	5.40715	0.00388329	NA
4930539C22Rik	1.7785	-0.00966286	NA
4930539E08Rik	74.7167	0.08844	0.99991
4930539J05Rik	30.8597	0.0121703	0.99991
4930543E12Rik	2.62064	0.00770205	NA
4930544D05Rik	0.464886	0.00441397	NA
4930544G11Rik	1.72516	-0.00377657	NA
4930546K05Rik	2.28352	0.00138151	NA
4930547C10Rik	3.34716	0.00144093	NA
4930547E08Rik	3.24555	-0.00493382	NA
4930547E14Rik	1.10225	-0.00650551	NA
4930548H24Rik	2.5693	-0.00207839	NA
4930549G23Rik	10.5737	-0.0129073	0.99991
4930550C14Rik	42.1541	0.0556163	0.99991
4930550L24Rik	3865.4	0.0131434	0.99991
4930552P12Rik	9.43182	-0.00490573	0.99991
4930555B11Rik	1.23461	0.00249972	NA
4930556C24Rik	2.46922	0.00480975	NA
4930556M19Rik	70.4841	0.00972863	0.99991
4930558K02Rik	9.65101	-0.100923	0.130692
4930562C15Rik	1.23537	-0.00960464	NA
4930563D23Rik	0.57157	-0.00567647	NA
4930563E18Rik	0.477334	0.00530301	NA
4930563E22Rik	166.612	-0.095137	0.99991
4930563M20Rik	8.22413	0.00970265	0.99991
4930564G21Rik	0.524834	-0.00615917	NA
4930564K09Rik	10.9215	-0.0455078	0.99991
4930568D16Rik	3.35808	-0.0111143	NA
4930568E12Rik	2.43186	-0.0276657	NA
4930570G19Rik	22.0929	0.00978547	0.99991
4930572O03Rik	1.00217	-0.000627813	NA
4930577N17Rik	97.9328	-0.0460502	0.99991
4930578C19Rik	3.8631	-7.76766e-05	NA
4930578M01Rik	8.83657	-0.0344775	0.99991
4930579F01Rik	0.722989	-0.0027767	NA
4930579G18Rik	1.24782	-0.00949181	NA
4930579G24Rik	277.251	-0.20588	0.505337
4930579K19Rik	67.9082	-0.0210239	0.99991
4930581F22Rik	65.8163	0.0219557	0.99991
4930583K01Rik	5.1996	0.00118243	NA
4930584F24Rik	1.28795	-0.00430757	NA
4930590J08Rik	3.72212	0.0133707	NA
4930590L20Rik	0.48394	-0.000159802	NA
4930591A17Rik	4.58409	0.0129892	NA
4930593A02Rik	1.21556	0.00693065	NA
4930593C16Rik	0.810619	-0.00938034	NA
4930594C11Rik	63.5461	-0.0436098	0.99991
4930595M18Rik	113.263	-0.0708875	0.99991
4930599N23Rik	10.7477	-0.00717667	0.99991
4931402G19Rik	0.471492	-0.000278439	NA
4931406B18Rik	2.40649	0.0107145	NA
4931406C07Rik	926.314	0.0593949	0.99991
4931406H21Rik	4.36409	0.01024	NA
4931406P16Rik	3494.57	-0.0967616	0.99991
4931409K22Rik	3.92765	-0.0013558	NA
4931414P19Rik	198.771	0.0642527	0.99991
4931417E11Rik	2.1862	-0.0192884	NA
4931423N10Rik	2.38436	-0.0177206	NA
4931428F04Rik	278.673	0.0442504	0.99991
4931428L18Rik	7.4788	-0.0252439	0.99991
4931429I11Rik	4.23172	0.00128799	NA
4931429P17Rik	0.954669	0.0109849	NA
4931431C16Rik	1.5679	-0.0135905	NA
4931440F15Rik	0.478098	-0.00494821	NA
4931440J10Rik	2.05691	0.00414959	NA
4931440L10Rik	2.49412	0.00502206	NA
4931440P22Rik	31.3207	-0.044869	0.99991
4932411N23Rik	0.722989	-0.0027767	NA
4932412D23Rik	8.13803	-0.00679708	0.99991
4932413F04Rik	0.996326	-0.00672727	NA
4932414N04Rik	1.77266	-0.0159226	NA
4932415G12Rik	16.3889	-0.0324148	0.99991
4932416H05Rik	103.276	-0.0921951	0.99991
4932416K20Rik	0.489783	0.00467692	NA
4932418E24Rik	10.5189	-0.0242976	0.99991
4932435O22Rik	6.61379	-0.0283959	0.99991
4932438A13Rik	5748.83	-0.0788416	0.99991
4932438H23Rik	2.69506	0.0133374	NA
4932441J04Rik	1.47366	-0.000758615	NA
4933400C23Rik	8.23074	0.00404448	0.99991
4933401D09Rik	14.6459	-0.0188882	0.99991
4933401H06Rik	1.42108	-0.00524754	NA
4933402E13Rik	7035.9	-0.00272366	0.99991
4933402J07Rik	11.171	0.0151499	0.99991
4933402J15Rik	0.48394	-0.000159802	NA
4933403O08Rik	73.4835	0.00465305	0.99991
4933405D12Rik	5.35534	-0.0124245	NA
4933405L10Rik	3.13887	0.00781892	NA
4933405O20Rik	2.41588	0.0111205	NA
4933406C10Rik	23.4525	-0.0381161	0.99991
4933406F09Rik	0.956196	-0.00946337	NA
4933406G16Rik	0.478098	-0.00494821	NA
4933406I18Rik	5.54612	0.00681791	NA
4933406J08Rik	231.214	-0.28956	0.060891
4933406K04Rik	0.530676	-0.00028853	NA
4933406M09Rik	5.18994	0.00643193	NA
4933407K13Rik	51.0886	0.0608121	0.99991
4933407L21Rik	1.28211	-0.0102307	NA
4933408B17Rik	21.0039	0.00591298	0.99991
4933408J17Rik	4.88587	0.00352717	NA
4933408N05Rik	0.804013	-0.00366014	NA
4933409G03Rik	1.00801	0.00552057	NA
4933411E08Rik	5.45236	0.0269484	NA
4933411G11Rik	10.9191	-0.0903779	0.396734
4933411K16Rik	3.44879	0.0169876	NA
4933411K20Rik	867.147	-0.0824414	0.99991
4933412E12Rik	85.123	0.0179013	0.99991
4933412E24Rik	11.0386	-0.0407145	0.99991
4933413G19Rik	1.05551	-0.00702932	NA
4933413J09Rik	85.8178	0.149681	0.864429
4933415F23Rik	6.74029	-0.0577696	0.78906
4933416C03Rik	486.647	-0.353432	0.00334502
4933416M07Rik	24.0833	-0.0133029	0.99991
4933417D19Rik	8.96617	0.00116882	0.99991
4933417E11Rik	0.471492	-0.000278439	NA
4933417G07Rik	16.5595	0.0171565	0.99991
4933421I07Rik	0.471492	-0.000278439	NA
4933421O10Rik	178.676	-0.0142324	0.99991
4933422A05Rik	0.524834	-0.00615917	NA
4933422H20Rik	1.527	-0.00756976	NA
4933424G05Rik	4.50506	-0.00221551	NA
4933424G06Rik	1.76529	0.00200117	NA
4933425L06Rik	66.0399	-0.154012	0.708673
4933426D04Rik	0.48394	-0.000159802	NA
4933426M11Rik	1382.21	-0.043616	0.99991
4933427D06Rik	1029.41	0.0636854	0.99991
4933427D14Rik	329.28	0.0839388	0.99991
4933427E11Rik	6.08895	-0.0221046	0.99991
4933427G17Rik	60.7968	-0.302868	0.00121951
4933430H16Rik	12.558	-0.02211	0.99991
4933430I17Rik	50.379	-0.0792469	0.99991
4933430M04Rik	0.69733	0.00685789	NA
4933431E20Rik	481.302	0.0474231	0.99991
4933432I09Rik	0.518228	-0.000370565	NA
4933432K03Rik	1.71195	0.00867942	NA
4933433C11Rik	5.36244	0.0212075	NA
4933433G15Rik	28.6687	-0.0694238	0.99991
4933434E20Rik	858.751	0.0263767	0.99991
4933434I20Rik	1.00293	-0.0115922	NA
4933436I01Rik	0.477334	0.00530301	NA
4933438B17Rik	3.478	-0.00191783	NA
4933439C10Rik	148.886	0.0634552	0.99991
4933439K11Rik	0.471492	-0.000278439	NA
4933440J02Rik	0.464886	0.00441397	NA
5-qF-14224	8.26224	-0.00156169	0.99991
5-qF-14508	3.33242	0.000349187	NA
5-qF-4633	59.5839	-0.000676938	0.99991
5-qG2-2301	25.0105	-0.0116776	0.99991
5-qG3-23659	4.05033	-0.02121	NA
5031410I06Rik	2.67322	0.0145074	NA
5031414D18Rik	222.651	-0.0556527	0.99991
5031425E22Rik	261.651	-0.0544301	0.99991
5031425F14Rik	3.29229	-0.0053188	NA
5031426D15Rik	11.66	-0.0138428	0.99991
5031434C07Rik	8.62165	-0.0182359	0.99991
5031434O11Rik	6.36537	0.00872302	0.99991
5031439G07Rik	442.337	0.0539425	0.99991
5033403H07Rik	35.2697	0.00180371	0.99991
5033404E19Rik	0.518228	-0.000370565	NA
5033406O09Rik	3.21711	0.00179278	NA
5033411D12Rik	88.1192	0.0126989	0.99991
5330411J11Rik	0.57157	-0.00567647	NA
5330413P13Rik	1.18127	0.00852871	NA
5330417C22Rik	60.4989	-0.0164117	0.99991
5330426P16Rik	65.1206	-0.0859262	0.99991
5330439B14Rik	0.750671	0.00212774	NA
5430402O13Rik	51.1848	-0.0688434	0.99991
5430405H02Rik	45.5872	0.0296789	0.99991
5430416O09Rik	137.254	0.00727494	0.99991
5430417L22Rik	375.847	-0.0347452	0.99991
5430419D17Rik	0.48394	-0.000159802	NA
5430421N21Rik	0.48394	-0.000159802	NA
5430427O19Rik	3.72212	0.0133707	NA
5430434I15Rik	0.471492	-0.000278439	NA
5430435G22Rik	1224.27	0.0225473	0.99991
5430440P10Rik	0.703935	0.00249404	NA
5530601H04Rik	75.0485	0.0439241	0.99991
5730403I07Rik	12.5158	0.0316764	0.99991
5730405O15Rik	20.1219	0.0415536	0.99991
5730408K05Rik	195.083	-0.0904008	0.99991
5730409E04Rik	275.32	-0.00532896	0.99991
5730412P04Rik	3.23234	0.00724889	NA
5730416F02Rik	2.80759	0.00606316	NA
5730420D15Rik	2.05768	-0.0078074	NA
5730422E09Rik	7.56491	-0.010004	0.99991
5730435O14Rik	0.464886	0.00441397	NA
5730455P16Rik	656.318	-0.0418001	0.99991
5730457N03Rik	1.62124	-0.018551	NA
5730480H06Rik	52.3605	0.0758508	0.99991
5730507C01Rik	68.22	0.0613605	0.99991
5730508B09Rik	787.725	-0.186084	0.487039
5730522E02Rik	5.18918	0.0183836	NA
5730559C18Rik	19.9982	-0.0328007	0.99991
5730577I03Rik	24.5208	0.0136878	0.99991
5830403L16Rik	1.32224	-0.00389076	NA
5830403M04Rik	1.49195	0.005684	NA
5830411N06Rik	0.979565	0.0093713	NA
5830415F09Rik	300.543	-0.0778832	0.99991
5830416P10Rik	4.15425	-0.00443157	NA
5830417I10Rik	243.54	0.0970628	0.99991
5830418K08Rik	1861.93	-0.0797848	0.99991
5830418P13Rik	3.70105	0.00171529	NA
5830428M24Rik	0.464886	0.00441397	NA
5830444B04Rik	8.84704	0.0133163	0.99991
5830454E08Rik	26.5344	-0.0483418	0.99991
5830473C10Rik	4.1372	-0.0152423	NA
5930403L14Rik	29.62	-0.00603939	0.99991
5930412G12Rik	18.5669	-0.0145129	0.99991
5930438M14Rik	0.98972	-0.000676676	NA
6-qC3-100	11.6488	0.0138071	0.99991
6-qC3-2394	16.1017	-0.0305082	0.99991
6-qC3-6258	5.37994	-0.0426438	NA
6-qD1-2831	53.1462	-0.0104943	0.99991
6-qF3-1063	49.0113	0.0527896	0.99991
6-qF3-28913	0.57157	-0.00567647	NA
6-qF3-3040	183.142	-0.0884143	0.99991
6-qF3-8009	2.71764	-0.0305607	NA
6030407O03Rik	2.76975	-0.0317044	NA
6030408B16Rik	578.061	-0.0152999	0.99991
6030419C18Rik	54.2906	0.00158119	0.99991
6030458C11Rik	767.971	0.0481177	0.99991
6030466F02Rik	2.46262	0.0106622	NA
6030498E09Rik	15.4159	-0.00767767	0.99991
6230400D17Rik	42.0969	0.0136031	0.99991
6330403A02Rik	13.91	0.00843849	0.99991
6330403K07Rik	79.8825	0.0820969	0.99991
6330403M23Rik	217.823	0.0673278	0.99991
6330408A02Rik	245.902	-0.194754	0.60833
6330409D20Rik	1.96344	0.00553128	NA
6330410L21Rik	0.518228	-0.000370565	NA
6330415B21Rik	1.7061	0.00225691	NA
6330416G13Rik	201.712	0.00365021	0.99991
6330418K02Rik	56.5487	-0.0561511	0.99991
6330549D23Rik	127.022	-0.0722524	0.99991
6430411K18Rik	7.4496	-0.00776972	0.99991
6430531B16Rik	10.7322	-0.00873793	0.99991
6430548M08Rik	248.309	-0.0867727	0.99991
6430550D23Rik	22.0469	-0.0776118	0.99991
6430562O15Rik	6.61916	0.0179892	0.99991
6430571L13Rik	26.5388	0.0480676	0.99991
6430573F11Rik	65.3489	0.0118686	0.99991
6430584L05Rik	5.72493	-0.0112338	NA
6530402F18Rik	45.168	-0.00127675	0.99991
6530411M01Rik	1.00877	-0.00661646	NA
6720401G13Rik	511.124	0.161248	0.863518
6720456H20Rik	581.523	-0.0381678	0.99991
6720468P15Rik	9.50145	0.0107621	0.99991
6720483E21Rik	17.7532	-0.00649962	0.99991
6720489N17Rik	123.674	-0.0321139	0.99991
6820408C15Rik	54.658	-0.0570383	0.99991
6820431F20Rik	68.113	0.0391469	0.99991
6820431F20Rik.2	219.916	0.0187806	0.99991
7-qB5-6255	6.3435	-0.069393	0.394439
7-qD1-16444	5.6708	-0.0284362	NA
7-qD1-19431	0.716383	0.0029392	NA
7-qD1-654	1.53945	-0.00677589	NA
7-qD1-9417	0.57157	-0.00567647	NA
7-qD2-11976	1.5745	-0.0183607	NA
7-qD2-24830	2.80835	-0.00523771	NA
7-qD2-40	16.0997	-0.00318752	0.99991
7-qF3-3125	6.51016	-0.0150959	0.99991
7420426K07Rik	0.763119	0.00254437	NA
7420700N18Rik	1.42616	0.0116127	NA
8-qC5-2209	18.7873	-0.204384	0.000673633
8-qC5-8200	11.6826	-0.104294	0.210976
8-qE1-3748	2.00434	-0.00121296	NA
8030411F24Rik	1013.97	0.0874393	0.99991
8030423F21Rik	9.6864	0.0242797	0.99991
8030423J24Rik	1.2689	0.00150367	NA
8030443G20Rik	1.0489	-0.000965067	NA
8030462N17Rik	762.498	-0.11678	0.99991
8430403D17Rik	1.24782	-0.00949181	NA
8430408G22Rik	27.2341	0.000482028	0.99991
8430410A17Rik	443.776	-0.122808	0.99991
8430419L09Rik	150.568	0.116295	0.99991
8430426J06Rik	21.1499	-0.00305045	0.99991
8430427H17Rik	805.933	-0.03553	0.99991
8430429K09Rik	185.468	-0.0205636	0.99991
8430437L04Rik	1.00801	0.00552057	NA
9-qA1-178	43.7836	-0.168458	0.28697
9-qA5.3-1495	1.00217	-0.000627813	NA
9-qA5.3-24188	2.03862	-0.00166582	NA
9-qC-10667	9.31312	-0.0932882	0.183352
9-qC-31469	8.86346	-0.0934098	0.147517
9-qF4-150	10.3557	-0.0330024	0.99991
9030025P20Rik	14.2745	0.00662261	0.99991
9030612E09Rik	57.4589	0.00210773	0.99991
9030617O03Rik	52.3168	0.0247286	0.99991
9030624G23Rik	13.6071	0.00171725	0.99991
9030624J02Rik	2518.75	0.0157611	0.99991
9130008F23Rik	12.4302	-0.0101271	0.99991
9130011E15Rik	549.359	0.0164644	0.99991
9130017N09Rik	11.8878	0.0109309	0.99991
9130019O22Rik	51.9068	0.00954007	0.99991
9130019P16Rik	12.7767	-0.00435223	0.99991
9130023H24Rik	241.366	-0.249987	0.202858
9130024F11Rik	1.20617	0.00874413	NA
9130206I24Rik	14.0662	0.0480588	0.99991
9130221H12Rik	81.8047	0.0199875	0.99991
9130227L01Rik	1.24782	-0.00949181	NA
9130401M01Rik	1251.32	0.12623	0.970416
9230102K24Rik	3.82957	-0.0116401	NA
9230104L09Rik	10.6395	-0.019184	0.99991
9230105E05Rik	1.94515	-0.000868553	NA
9230110C19Rik	474.885	-0.107501	0.99991
9230112J17Rik	1.04967	-0.0122648	NA
9230115E21Rik	0.769725	-0.00359477	NA
9230116N13Rik	64.0728	0.0453905	0.99991
9330020H09Rik	114.626	-0.010287	0.99991
9330102E08Rik	2.20249	0.00231522	NA
9330111N05Rik	3.96854	-0.00792176	NA
9330133O14Rik	83.3789	0.0532462	0.99991
9330151L19Rik	318.471	0.0258366	0.99991
9330159F19Rik	21.2239	0.00849198	0.99991
9330159M07Rik	29.1399	0.0267101	0.99991
9330175E14Rik	0.983115	0.00459446	NA
9330175M20Rik	0.530676	-0.00028853	NA
9330179D12Rik	11.0772	-0.0122889	0.99991
9330182L06Rik	167.503	0.0692273	0.99991
9430008C03Rik	1.4795	0.00570182	NA
9430015G10Rik	542.714	-0.0568048	0.99991
9430016H08Rik	592.135	-0.0159329	0.99991
9430018G01Rik	50.1626	-0.0214897	0.99991
9430020K01Rik	2583.7	0.000162763	0.99991
9430021M05Rik	9.78571	0.0312357	0.99991
9430023L20Rik	821.244	-0.0459542	0.99991
9430037G07Rik	24.9565	0.0652559	0.99991
9430038I01Rik	293.977	0.0458393	0.99991
9430041J12Rik	71.4263	0.0293793	0.99991
9430060I03Rik	9.994	0.033387	0.99991
9430076C15Rik	8.18755	-0.00198467	0.99991
9430076G02Rik	3.05985	-0.00829923	NA
9430083A17Rik	122.225	-0.0459169	0.99991
9430091E24Rik	33.3063	-0.0460771	0.99991
9530002B09Rik	35.6841	0.016869	0.99991
9530026P05Rik	9.35585	-0.0182791	0.99991
9530027J09Rik	1.00877	-0.00661646	NA
9530036O11Rik	1.99189	-0.00129754	NA
9530048J24Rik	0.942984	-0.000234738	NA
9530051G07Rik	10.8821	0.0184372	0.99991
9530059O14Rik	0.48394	-0.000159802	NA
9530068E07Rik	4332.53	0.0699694	0.99991
9530077C05Rik	362.379	-0.138478	0.99991
9530080O11Rik	27.7482	-0.0154412	0.99991
9530082P21Rik	9.19862	0.00402376	0.99991
9530091C08Rik	4.1418	-0.00449904	NA
9630028B13Rik	13.379	-0.00481919	0.99991
9630033F20Rik	551.569	-4.12189e-05	0.99991
9830001H06Rik	491.858	0.0452785	0.99991
9830107B12Rik	0.471492	-0.000278439	NA
9830132P13Rik	0.48394	-0.000159802	NA
9830147E19Rik	392.281	-0.071417	0.99991
9830166K06Rik	6.35243	0.0145131	0.99991
9930012K11Rik	57.5582	-0.00830069	0.99991
9930013L23Rik	67.858	0.00977031	0.99991
9930014A18Rik	32.4731	-0.026028	0.99991
9930021J03Rik	2024.05	-0.0272184	0.99991
9930104L06Rik	348.455	0.0208594	0.99991
9930111J21Rik1	1.04306	-0.00714151	NA
A030009H04Rik	1087.2	-0.051493	0.99991
A130010J15Rik	251.769	0.00621649	0.99991
A130049A11Rik	156.658	-0.0816881	0.99991
A130077B15Rik	1.71195	0.00867942	NA
A1cf	1.04967	-0.0122648	NA
A230009B12Rik	5.14981	0.000824932	NA
A230020J21Rik	1.17466	0.0130842	NA
A230028O05Rik	4.10214	-0.00302593	NA
A230046K03Rik	1746.59	0.191961	0.189598
A230050P20Rik	99.9092	0.0438481	0.99991
A230056J06Rik	8.15984	-0.0415665	0.99991
A230056P14Rik	33.8256	-0.000568942	0.99991
A230057D06Rik	26.3429	0.0472157	0.99991
A230065H16Rik	28.0491	0.0338745	0.99991
A230070E04Rik	1.90426	0.00526006	NA
A230072C01Rik	62.0466	-0.030339	0.99991
A230072E10Rik	6.13445	-0.016756	0.99991
A230073K19Rik	1.67105	0.0145683	NA
A230077H06Rik	0.961275	0.00591339	NA
A2AKI0	155.36	0.0460163	0.99991
A2ASR7	95.0729	0.000871924	0.99991
A2J009	0.48394	-0.000159802	NA
A2NTU7	1.43937	-0.000177173	NA
A2m	20.9373	-0.0218136	0.99991
A330009N23Rik	13.4938	-0.0131725	0.99991
A330021E22Rik	123.252	-0.159576	0.864429
A330023F24Rik	36.0125	-0.0157861	0.99991
A330032B11Rik	1.74345	0.00229671	NA
A330035P11Rik	52.9635	-0.0274155	0.99991
A330040F15Rik	0.995563	0.00541052	NA
A330041J22Rik	136.87	-0.0188183	0.99991
A330048O09Rik	2.46846	0.0156554	NA
A330049N07Rik	3.77039	-0.011586	NA
A330050B17Rik	7.28497	-0.000757737	0.99991
A330069E16Rik	57.5892	-0.0182581	0.99991
A330076C08Rik	3.10658	-0.00848263	NA
A330076H08Rik	27.4305	-0.0139375	0.99991
A330102I10Rik	7.65409	-0.00674723	0.99991
A3KML5	495.316	-0.152552	0.955574
A3galt2	4.13798	0.00504133	NA
A430005L14Rik	406.337	0.0641057	0.99991
A430033K04Rik	178.794	0.0334988	0.99991
A430035B10Rik	56.8289	-0.100203	0.99991
A430071A18Rik	9.4209	0.0192452	0.99991
A430078G23Rik	48.8778	0.00254497	0.99991
A430092G05Rik	1.67182	0.00256082	NA
A430093F15Rik	1.4795	0.00570182	NA
A430105I19Rik	51.0987	-0.00301952	0.99991
A4galt	92.5919	0.0889456	0.99991
A530016L24Rik	1.5044	0.00510578	NA
A530032D15Rik	0.703935	0.00249404	NA
A530054K11Rik	488.221	-0.0162216	0.99991
A530064D06Rik	3.87633	0.0215298	NA
A530065N20Rik	0.48394	-0.000159802	NA
A530072M11Rik	34.1072	-0.00693551	0.99991
A530088E08Rik	0.728831	0.00270369	NA
A530099J19Rik	0.955432	-0.000168403	NA
A630001G21Rik	9.1737	-0.0294596	0.99991
A630007B06Rik	938.721	0.014749	0.99991
A630019I02Rik	0.942984	-0.000234738	NA
A630020A06	3.68936	-0.010007	NA
A630023A22Rik	9.9694	0.0156848	0.99991
A630023P12Rik	1.43277	0.00559912	NA
A630033H20Rik	23.855	0.0310944	0.99991
A630066F11Rik	68.2618	0.0326856	0.99991
A630072M18Rik	205.573	-0.0281881	0.99991
A630073D07Rik	6.75429	-0.000345864	0.99991
A630075F10Rik	4.37348	0.0101027	NA
A630077J23Rik	21.3341	-0.00926224	0.99991
A630089N07Rik	32.1119	0.0600276	0.99991
A630095N17Rik	1.71779	0.0141533	NA
A6NAV6	2.23678	0.00184042	NA
A730008H23Rik	22.237	-0.0146363	0.99991
A730017C20Rik	334.514	-0.0743186	0.99991
A730017L22Rik	51.019	0.0766164	0.99991
A730020E08Rik	2.34346	-0.0112078	NA
A730020M07Rik	4.64606	0.0184115	NA
A730046J19Rik	43.2676	0.0371808	0.99991
A730056A06Rik	38.3974	0.0201197	0.99991
A730085A09Rik	53.3322	0.0286445	0.99991
A730090H04Rik	1.22877	-0.00363324	NA
A730090N16Rik	3.0065	-0.00178653	NA
A730098P11Rik	121.75	0.0233714	0.99991
A830009L08Rik	3.94288	0.00396965	NA
A830010M20Rik	334.829	0.0155414	0.99991
A830018L16Rik	8.58228	-0.0864827	0.286692
A830052D11Rik	3.19221	0.0016126	NA
A830080D01Rik	1451.67	-0.021364	0.99991
A830082K12Rik	3.383	0.023221	NA
A830082N09Rik	41.4242	-0.00586569	0.99991
A930001C03Rik	2.35007	-0.0162125	NA
A930003A15Rik	0.477334	0.00530301	NA
A930004D18Rik	27.5616	0.0115286	0.99991
A930005H10Rik	62.7485	-0.00363418	0.99991
A930006K02Rik	27.727	-0.00647047	0.99991
A930007I19Rik	12.8938	-0.000196076	0.99991
A930011G23Rik	1.24706	0.00261227	NA
A930011O12Rik	0.709778	0.00815671	NA
A930012L18Rik	2.19589	0.00853436	NA
A930013F10Rik	53.3923	-0.000465549	0.99991
A930015D03Rik	5.68833	-0.0097822	NA
A930016O22Rik	2.96253	-0.0290405	NA
A930017M01Rik	1.67766	0.00845837	NA
A930018P22Rik	10.9451	0.00671176	0.99991
A930024E05Rik	57.1188	0.0494629	0.99991
A930041C12Rik	13.8668	0.0168702	0.99991
AA387883	0.757277	-0.00370492	NA
AA388235	13.1941	0.0130522	0.99991
AA414768	692.908	-0.0541751	0.99991
AA415398	75.8255	-0.0188267	0.99991
AA465934	44.3456	-0.00679813	0.99991
AA467197	196.132	-0.0261095	0.99991
AA474331	70.9043	0.0015775	0.99991
AA543186	22.7696	-0.0293354	0.99991
AA543401	1.20109	-0.00782819	NA
AA986860	26.4153	-0.00765074	0.99991
AA987161	700.332	0.0792444	0.99991
AB124611	13.8248	-0.0377586	0.99991
AF251705	41.3973	-0.0045979	0.99991
AF357355	72.2065	0.0386551	0.99991
AF357399	9.8695	0.00225527	0.99991
AF357425	24.564	0.0500397	0.99991
AF357426	0.471492	-0.000278439	NA
AF529169	9.61598	-0.0113324	0.99991
AI118078	52.3429	0.0439366	0.99991
AI182371	27.3649	-0.0440149	0.99991
AI197445	1.99773	0.00499299	NA
AI314180	3886.44	-0.0093104	0.99991
AI314831	117.476	-0.0617744	0.99991
AI316807	593.98	0.0615099	0.99991
AI317395	1.46705	0.00546708	NA
AI413582	77.17	0.0288708	0.99991
AI414108	254.557	0.121503	0.99991
AI427809	66.8509	-0.00944385	0.99991
AI429214	83.5946	-0.0612062	0.99991
AI450353	62.6468	0.00500671	0.99991
AI462493	474.251	0.0626015	0.99991
AI464131	25.0702	0.0115055	0.99991
AI467606	20.5802	-0.0226467	0.99991
AI480653	455.121	0.0364881	0.99991
AI504432	357.006	0.101906	0.99991
AI506816	1.81863	-0.00456943	NA
AI593442	3.9152	-0.00148369	NA
AI597468	749.002	0.0838528	0.99991
AI597479	1136.16	0.0221307	0.99991
AI607873	65.9955	-0.168962	0.515637
AI646519	1.28795	-0.00430757	NA
AI661453	84.0356	0.0520818	0.99991
AI662270	102.388	0.133996	0.99991
AI836003	11.2543	-0.0192717	0.99991
AI837181	314.861	0.0900379	0.99991
AI839979	10.0882	-0.0232983	0.99991
AI846148	678.888	-0.117655	0.99991
AI847159	1.28211	-0.0102307	NA
AI848285	1267.61	0.056222	0.99991
AI854517	136.878	-0.0783642	0.99991
AI854703	27.0573	0.0204881	0.99991
AI987944	398.77	-0.0702541	0.99991
AK010878	120.879	-0.075979	0.99991
AK129341	459.449	-0.198582	0.512926
AU015228	35.871	-0.0262807	0.99991
AU015836	6058.22	-0.0787289	0.99991
AU018091	11.2909	-0.0207473	0.99991
AU019823	1134.08	-0.047641	0.99991
AU021063	1.0489	-0.000965067	NA
AU021092	219.806	-3.67921e-05	0.99991
AU022252	261.534	0.060361	0.99991
AU022751	256.419	-0.0407624	0.99991
AU022754	0.757277	-0.00370492	NA
AU023762	0.804013	-0.00366014	NA
AU023871	10.0664	0.0103278	0.99991
AU040320	870.444	-0.163999	0.669271
AU041133	188.528	0.0821521	0.99991
AV039307	10.7187	-0.0546292	0.99991
AV051173	12.703	0.0251213	0.99991
AW011738	2.89398	0.00479721	NA
AW046200	36.0948	0.00803058	0.99991
AW112010	20.8472	-0.0219899	0.99991
AW146154	233.49	0.0131707	0.99991
AW209491	575.989	-0.0653692	0.99991
AW495222	0.48394	-0.000159802	NA
AW549542	9.62337	0.00422161	0.99991
AW549877	2921.57	-0.0153106	0.99991
AW551984	42.8997	0.0143216	0.99991
AW554918	483.17	-0.0622084	0.99991
AY074887	7.28881	0.0199368	0.99991
AY358078	14.0624	0.0242642	0.99991
AY512931	0.757277	-0.00370492	NA
Aaas	1007.18	-0.0466351	0.99991
Aacs	352.385	0.108907	0.99991
Aadat	1.75945	-0.00439322	NA
Aaed1	559.538	0.0374415	0.99991
Aagab	2218.14	-0.0350606	0.99991
Aak1	993.49	0.0720391	0.99991
Aamdc	448.475	0.0347117	0.99991
Aamp	2696.14	-0.112151	0.969443
Aar2	704.673	-0.00710735	0.99991
Aard	36431.1	0.0113525	0.99991
Aars	2044.04	0.0361202	0.99991
Aars2	237.328	0.0356202	0.99991
Aarsd1	601.214	-0.0115763	0.99991
Aasdh	336.703	-0.0665447	0.99991
Aasdhppt	1387.51	-0.0765498	0.99991
Aass	532.971	-0.0718498	0.99991
Aatf	1048.95	-0.106405	0.99991
Aatk	14.9009	0.00364999	0.99991
Abat	2687.52	-0.0849253	0.99991
Abca1	4169.54	0.00378901	0.99991
Abca12	30.7299	0.0394426	0.99991
Abca13	13.1921	-0.00338267	0.99991
Abca14	0.710541	-0.0028775	NA
Abca16	57.6044	-0.038405	0.99991
Abca17	64.6871	-0.000391529	0.99991
Abca2	1544.36	0.0940703	0.99991
Abca3	570.887	0.241656	0.160181
Abca4	33.3484	0.016475	0.99991
Abca5	936.173	-0.3155	0.00247917
Abca6	185.192	-0.0152762	0.99991
Abca7	231.336	0.164736	0.917476
Abca8a	49.7236	-0.0781598	0.99991
Abca8b	86.8003	-0.0107963	0.99991
Abca9	110.839	0.0467747	0.99991
Abcb10	935.008	-0.0433215	0.99991
Abcb11	1.44598	-0.00503733	NA
Abcb1a	154.085	0.00211836	0.99991
Abcb1b	39.6155	0.00587262	0.99991
Abcb4	5.05403	-0.0447895	NA
Abcb5	61.8696	0.015679	0.99991
Abcb6	450.9	0.039253	0.99991
Abcb7	784.387	-0.00646392	0.99991
Abcb8	398.452	0.0947126	0.99991
Abcb9	40.2808	-0.0304464	0.99991
Abcc1	3282.65	0.0478039	0.99991
Abcc10	218.66	0.133329	0.99991
Abcc12	3.16655	0.013102	NA
Abcc2	14.654	-0.0155297	0.99991
Abcc3	32.1888	0.0704893	0.99991
Abcc4	393.369	0.0248993	0.99991
Abcc5	1213.54	0.110006	0.99991
Abcc6	7.13002	0.0357576	0.99991
Abcc8	193.622	0.0925642	0.99991
Abcc9	88.6944	0.0264287	0.99991
Abcd1	142.622	-0.104299	0.99991
Abcd2	406.53	0.0213836	0.99991
Abcd3	4285.99	0.00567438	0.99991
Abcd4	90.5979	-0.00592025	0.99991
Abce1	4610.8	0.113258	0.811457
Abcf1	2936.91	-0.0938644	0.99991
Abcf2	2379.24	-0.118508	0.826763
Abcf3	1400.65	0.0242157	0.99991
Abcg1	377.236	-0.0447129	0.99991
Abcg2	609.908	0.124832	0.99991
Abcg3	17.5803	0.00430355	0.99991
Abcg4	37.6907	0.0565143	0.99991
Abcg5	2.46922	0.00480975	NA
Abcg8	1.00801	0.00552057	NA
Abhd1	42.7166	0.00611277	0.99991
Abhd10	848.723	0.00874996	0.99991
Abhd11	691.697	0.0276634	0.99991
Abhd12	1350.21	-0.156155	0.566455
Abhd12b	0.763883	-0.00894362	NA
Abhd13	1253.48	0.0147421	0.99991
Abhd14a	182.655	-0.0156911	0.99991
Abhd14b	164.532	-0.0335308	0.99991
Abhd15	8.50991	0.00632111	0.99991
Abhd16a	666.654	0.0608233	0.99991
Abhd2	245.096	-0.032732	0.99991
Abhd3	792.161	0.0308377	0.99991
Abhd4	10708.6	-0.0351353	0.99991
Abhd5	1080.62	-0.0161884	0.99991
Abhd6	992.05	-0.0126377	0.99991
Abhd8	253.898	-0.0110774	0.99991
Abi1	4661.75	0.0734149	0.99991
Abi2	1365.71	0.060251	0.99991
Abi3	26.3063	0.00547826	0.99991
Abi3bp	510.834	0.000761677	0.99991
Abl1	1448.27	0.041467	0.99991
Abl2	1515.69	0.115089	0.99991
Ablim1	288.378	-0.00744769	0.99991
Ablim2	46.0444	0.037894	0.99991
Ablim3	32.8127	0.00166709	0.99991
Abo	10.4881	-0.0233579	0.99991
Abp1	1.73176	-0.00894441	NA
Abr	689.687	0.0401486	0.99991
Abra	1.04967	-0.0122648	NA
Abracl	957.89	-0.0470546	0.99991
Abt1	618.104	-0.0225912	0.99991
Abtb1	486.187	0.00810031	0.99991
Abtb2	1134.16	-0.119266	0.99991
Acaa1a	421.89	0.026779	0.99991
Acaa1b	103.734	0.0939229	0.99991
Acaa2	3983.51	0.0184515	0.99991
Acaca	641.306	-0.0929456	0.99991
Acacb	218.051	0.0576033	0.99991
Acad10	93.8302	0.00924072	0.99991
Acad11	746.493	-0.0814827	0.99991
Acad12	99.2646	0.0104522	0.99991
Acad8	984.66	0.0241549	0.99991
Acad9	736.839	0.0693123	0.99991
Acadl	2174.77	-0.0512215	0.99991
Acadm	1778.19	0.0875745	0.99991
Acads	461.389	0.0207832	0.99991
Acadsb	2286.24	-0.117456	0.919703
Acadvl	1313.77	0.107872	0.99991
Acan	86.8694	0.0295982	0.99991
Acap1	26.186	0.0212962	0.99991
Acap2	1730.21	0.0238865	0.99991
Acap3	403.313	0.0681026	0.99991
Acat1	2903.88	0.0363608	0.99991
Acat2	907.963	-0.0405963	0.99991
Acat3	129.424	-0.0516415	0.99991
Acbd3	1721.83	-0.118999	0.99991
Acbd4	166.619	0.0612817	0.99991
Acbd5	2229.55	-0.0274272	0.99991
Acbd6	639.735	-0.136704	0.99991
Acbd7	26.9	0.0254176	0.99991
Accs	98.7291	0.108054	0.99991
Accsl	1.731	0.00247603	NA
Acd	436.814	-0.00434579	0.99991
Ace	707.459	0.0247614	0.99991
Ace2	133.451	-0.091372	0.99991
Acer1	2.72809	-0.0162052	NA
Acer2	186.854	-0.0581998	0.99991
Acer3	1029.76	-0.428095	1.0364e-06
Ache	2.24339	-0.00440458	NA
Acin1	4638.98	-0.118189	0.878763
Acly	7947.17	-0.00453858	0.99991
Acn9	331.119	-0.0144457	0.99991
Acnat1	1.42692	-0.000283444	NA
Aco1	1292.46	0.0541022	0.99991
Aco2	2748.28	-0.00788242	0.99991
Acot1	521.861	0.0753477	0.99991
Acot10	150.889	0.00138603	0.99991
Acot11	116.127	0.00707284	0.99991
Acot12	4.32875	-0.00618081	NA
Acot13	538.995	0.0712642	0.99991
Acot2	136.791	0.0677579	0.99991
Acot3	11.1196	0.00515527	0.99991
Acot4	6.8676	0.0149752	0.99991
Acot5	6.16519	-0.0112916	0.99991
Acot6	55.1272	0.00820928	0.99991
Acot7	604.205	-0.130115	0.99991
Acot8	180.479	0.0525816	0.99991
Acot9	512.763	0.0439071	0.99991
Acox1	1109.7	0.0703502	0.99991
Acox2	5.70662	-0.00376889	NA
Acox3	314.883	0.0737753	0.99991
Acoxl	20.6373	-0.0358958	0.99991
Acp1	449.845	0.0180027	0.99991
Acp2	744.73	0.104917	0.99991
Acp5	171.042	0.0894161	0.99991
Acp6	569.155	0.0495757	0.99991
Acpl2	247.157	0.0868566	0.99991
Acpp	60.9515	-0.0364304	0.99991
Acr	2.78651	-0.00449547	NA
Acrbp	69.2069	0.0210587	0.99991
Acrv1	1.81863	-0.00456943	NA
Acsbg1	8037.04	-0.0298674	0.99991
Acsbg2	1.06135	-0.00077303	NA
Acsf2	185.391	0.00297206	0.99991
Acsf3	157.693	-0.0193388	0.99991
Acsl1	1070.4	-0.03972	0.99991
Acsl3	2581.25	0.127542	0.846989
Acsl4	2219.72	0.0556853	0.99991
Acsl5	274.042	-0.0322224	0.99991
Acsl6	547.118	-0.119529	0.99991
Acsm3	71.4774	0.0413917	0.99991
Acsm4	1.71855	0.00242108	NA
Acsm5	1.432	0.0164338	NA
Acss1	1065.09	0.101463	0.99991
Acss2	1474.5	-0.464493	1.16418e-09
Acss3	68.3083	0.0224293	0.99991
Acta1	5.67388	0.00637724	NA
Acta2	7402.6	-0.0119844	0.99991
Actb	19404.1	-0.0588702	0.99991
Actbl2	1.81863	-0.00456943	NA
Actc1	10.1568	-0.0242095	0.99991
Actg1	269.582	0.0485848	0.99991
Actg2	130.891	-0.0290976	0.99991
Actl6a	2198.03	0.029206	0.99991
Actl6b	3.23895	0.00122152	NA
Actl7b	2.75501	0.00124373	NA
Actl9	0.530676	-0.00028853	NA
Actn1	372.098	-0.0375441	0.99991
Actn2	176.139	0.170056	0.834262
Actn3	267.611	0.0164613	0.99991
Actn4	2782.9	0.0417822	0.99991
Actr10	2213.5	-0.102085	0.99991
Actr1a	1330.43	-0.036259	0.99991
Actr1b	1004.45	0.0725542	0.99991
Actr2	2006.45	0.123536	0.99991
Actr3	1783.69	0.086962	0.99991
Actr3b	414.636	0.10091	0.99991
Actr5	278.429	0.0672105	0.99991
Actr6	1666.41	-0.0357309	0.99991
Actr8	906.757	-0.0204383	0.99991
Actrt3	4.18854	-0.00506024	NA
Acvr1	282.438	-0.0332099	0.99991
Acvr1b	520.804	0.0917723	0.99991
Acvr1c	17.5376	0.00506012	0.99991
Acvr2a	909.282	0.00309918	0.99991
Acvr2b	150.37	0.0422909	0.99991
Acvrl1	308.607	-0.0458745	0.99991
Acy1	410.822	0.0551958	0.99991
Acy3	107.683	0.0377157	0.99991
Acyp1	340.79	-0.0995551	0.99991
Acyp2	254.155	0.00924264	0.99991
Ada	48.4801	-0.00827256	0.99991
Adad1	441.172	-0.567462	4.80236e-09
Adad2	250.758	-0.0043248	0.99991
Adal	563.215	0.0609532	0.99991
Adam10	3852.27	0.0956695	0.99991
Adam11	57.4005	-0.00699663	0.99991
Adam12	310.171	0.0185411	0.99991
Adam15	505.086	0.208733	0.417703
Adam17	2191.14	0.0384965	0.99991
Adam19	183.579	0.0456091	0.99991
Adam1a	44.2372	0.0553109	0.99991
Adam1b	0.717147	-0.00722609	NA
Adam2	9.4338	-0.0983995	0.144865
Adam21	2.33762	-0.0177172	NA
Adam22	222.628	0.0627109	0.99991
Adam23	275.761	0.00516967	0.99991
Adam28	0.810619	-0.00938034	NA
Adam3	0.763119	0.00254437	NA
Adam30	3.95809	-0.0243504	NA
Adam32	8.63718	-0.0355778	0.99991
Adam33	11.1597	-0.0365795	0.99991
Adam4	5.78565	0.0113803	0.99991
Adam5	18.3388	-0.0354411	0.99991
Adam7	0.995563	0.00541052	NA
Adam8	39.6813	0.00058937	0.99991
Adam9	1758.66	0.00126016	0.99991
Adamdec1	0.477334	0.00530301	NA
Adamts1	542.347	-0.0327158	0.99991
Adamts10	542.597	0.122889	0.99991
Adamts12	113.491	-0.00371954	0.99991
Adamts13	0.471492	-0.000278439	NA
Adamts14	71.6152	0.108773	0.99991
Adamts15	86.7706	-0.1615	0.724285
Adamts16	6.6636	0.00561651	0.99991
Adamts17	53.4025	0.00488941	0.99991
Adamts18	3.23895	0.00122152	NA
Adamts19	123.871	0.0919053	0.99991
Adamts2	439.956	0.0273822	0.99991
Adamts20	39.6158	0.0286839	0.99991
Adamts3	42.5138	0.0646727	0.99991
Adamts4	40.5925	0.0206572	0.99991
Adamts5	3281.32	-0.0105744	0.99991
Adamts6	93.4564	-0.0725912	0.99991
Adamts7	216.21	-0.0059215	0.99991
Adamts8	23.1922	-0.0628149	0.99991
Adamts9	937.35	0.0262479	0.99991
Adamtsl1	19.9807	0.0276028	0.99991
Adamtsl2	43.1091	0.0206194	0.99991
Adamtsl3	12.3662	0.00100234	0.99991
Adamtsl4	100.243	0.00409254	0.99991
Adamtsl5	40.0383	0.0199417	0.99991
Adap1	100.994	0.122868	0.99991
Adap2	21.7724	-0.0360407	0.99991
Adar	1148.92	0.0332119	0.99991
Adarb1	503.967	0.0137836	0.99991
Adat1	157.618	-0.0181444	0.99991
Adat2	99.3176	0.0763276	0.99991
Adat3	37.8794	-0.0394687	0.99991
Adc	148.444	0.0229202	0.99991
Adck1	519.376	-0.0332999	0.99991
Adck2	143.896	0.0756782	0.99991
Adck3	1207.8	0.0473982	0.99991
Adck4	222.901	0.033948	0.99991
Adck5	532.672	0.0602617	0.99991
Adcy1	85.4022	0.0433032	0.99991
Adcy10	81.4302	-0.0214179	0.99991
Adcy2	131.07	-0.102625	0.99991
Adcy3	309.63	0.00589766	0.99991
Adcy4	29.9594	0.0224181	0.99991
Adcy5	161.125	0.0648099	0.99991
Adcy6	283.96	0.0606703	0.99991
Adcy7	967.079	0.049625	0.99991
Adcy8	1.25367	-0.00340887	NA
Adcy9	296.613	-0.0115049	0.99991
Adcyap1	4.42682	0.00394011	NA
Adcyap1r1	101.73	0.115172	0.99991
Add1	3922.73	-0.0101136	0.99991
Add2	82.6414	0.0185532	0.99991
Add3	6526.28	-0.0358295	0.99991
Adgb	13.4433	-0.0344659	0.99991
Adh1	848.082	0.133714	0.99991
Adh4	97.0483	0.0100803	0.99991
Adh5	3733.73	0.12093	0.635703
Adh6-ps1	0.489783	0.00467692	NA
Adh6a	1.00217	-0.000627813	NA
Adh7	6.34353	0.00932503	0.99991
Adhfe1	127.923	0.0204166	0.99991
Adi1	387.35	0.0141658	0.99991
Adipoq	1.20032	0.00276648	NA
Adipor1	4633.81	0.0557099	0.99991
Adipor2	1959.15	-0.0522887	0.99991
Adk	2612.16	-0.047574	0.99991
Adm	15.7151	0.00158141	0.99991
Adnp	3400.42	-0.0158184	0.99991
Adnp2	823.225	-0.0161112	0.99991
Ado	722.913	-0.0330332	0.99991
Adora1	4090.09	-0.0264942	0.99991
Adora2a	16.1632	0.0534955	0.99991
Adora2b	65.5632	0.0430235	0.99991
Adora3	1.26535	0.00732028	NA
Adpgk	835.429	-0.00244035	0.99991
Adprh	1317.9	-0.0326405	0.99991
Adprhl1	2.24262	0.00808764	NA
Adprhl2	347.249	0.101464	0.99991
Adprm	328.691	0.125539	0.99991
Adra1a	0.942221	0.0106623	NA
Adra1b	4.48216	-0.0179771	NA
Adra2a	4.18193	0.000896983	NA
Adra2b	17.7393	0.0157893	0.99991
Adra2c	29.7571	-0.0658186	0.99991
Adrb1	8.77386	0.00374275	0.99991
Adrb2	10.8844	-0.016286	0.99991
Adrb3	2.96561	0.00487948	NA
Adrbk1	1092.61	0.0504	0.99991
Adrbk2	102.983	0.0400907	0.99991
Adrm1	148.79	0.0317293	0.99991
Adsl	825.286	0.00718103	0.99991
Adss	2793.56	-0.218575	0.014247
Adssl1	35.5726	0.0793096	0.99991
Adtrp	5.47649	-0.00910677	NA
Aebp1	932.948	-0.0617596	0.99991
Aebp2	2012.61	0.0864137	0.99991
Aen	492.096	-0.0148582	0.99991
Aes	5209.01	-0.0642166	0.99991
Afap1	362.301	0.0913325	0.99991
Afap1l1	178.381	0.0712796	0.99991
Afap1l2	329.569	-0.038038	0.99991
Aff1	558.967	0.0725416	0.99991
Aff2	165.068	-0.0047356	0.99991
Aff3	486.97	-0.0258064	0.99991
Aff4	3225.29	-0.144729	0.470139
Afg3l1	994.464	0.0246062	0.99991
Afg3l2	2187.73	-0.102427	0.99991
Afm	0.942984	-0.000234738	NA
Afmid	191.129	-0.0225948	0.99991
Afp	217.223	0.0478477	0.99991
Aftph	1790.03	-0.0754996	0.99991
Aga	730.032	-0.124877	0.99991
Agap1	831.037	0.0577952	0.99991
Agap2	45.8353	-0.0257313	0.99991
Agap3	1479.74	-0.0359134	0.99991
Agbl1	4.72506	0.00058455	NA
Agbl2	80.6493	-0.0563722	0.99991
Agbl3	224.423	-0.211235	0.464701
Agbl4	14.6497	-0.0429873	0.99991
Agbl5	587.309	0.0328183	0.99991
Ager	17.4258	0.0141736	0.99991
Agfg1	1978	0.0893573	0.99991
Agfg2	1449.5	0.000953569	0.99991
Aggf1	2429.01	-0.0179528	0.99991
Agk	210.407	-0.0439273	0.99991
Agl	809.987	0.0615054	0.99991
Agmat	1.66521	0.00835517	NA
Agmo	48.434	0.00660378	0.99991
Ago1	835.392	0.192243	0.396734
Ago2	374.443	0.052393	0.99991
Ago3	680.72	-0.0875058	0.99991
Ago4	388.734	0.0637459	0.99991
Agpat1	1280.28	0.00659556	0.99991
Agpat2	132.109	-0.105071	0.99991
Agpat3	1354.84	-0.0161935	0.99991
Agpat4	932.567	-0.0360865	0.99991
Agpat5	1406.53	-0.0202681	0.99991
Agpat6	1020.64	0.0438543	0.99991
Agpat9	8.27545	-0.0132021	0.99991
Agphd1	90.7642	-0.0589804	0.99991
Agps	2656.29	0.0664504	0.99991
Agrn	1045.08	0.169956	0.516908
Agrp	3.07584	-0.0131986	NA
Agt	554.448	-0.0473958	0.99991
Agtpbp1	994.859	0.0979718	0.99991
Agtr1a	37.3099	-0.0326353	0.99991
Agtr2	190.447	0.13206	0.99991
Agtrap	1280.54	-0.0424748	0.99991
Agxt2	0.728831	0.00270369	NA
Agxt2l2	206.075	0.0707766	0.99991
Ahctf1	4634.81	0.00427437	0.99991
Ahcy	324.488	-0.00311908	0.99991
Ahcyl1	2997.24	-0.00580746	0.99991
Ahcyl2	1513.06	0.000249921	0.99991
Ahdc1	860.065	0.0260395	0.99991
Ahi1	780.99	-0.0701436	0.99991
Ahnak	1683.78	0.102107	0.99991
Ahr	259.005	0.0292639	0.99991
Ahrr	23.874	0.0256974	0.99991
Ahsa1	1456.66	0.00678341	0.99991
Ahsa2	661.562	0.0606048	0.99991
Ahsg	314.276	-0.00264683	0.99991
Aicda	0.471492	-0.000278439	NA
Aif1	60.6182	0.051494	0.99991
Aif1l	198.783	0.228261	0.330907
Aifm1	1701.35	-0.0583915	0.99991
Aifm2	432.921	0.022716	0.99991
Aifm3	275.309	0.0692617	0.99991
Aig1	123.309	0.0700115	0.99991
Aim1	176.782	0.0254905	0.99991
Aim1l	151.884	0.0253118	0.99991
Aim2	25.7239	-0.0101015	0.99991
Aimp1	2065.45	-0.0336462	0.99991
Aimp2	793.08	-0.0570486	0.99991
Aip	582.769	-0.0438995	0.99991
Aipl1	22.24	0.0298058	0.99991
Aire	1.34714	-0.00368238	NA
Airn	37.0864	0.0124497	0.99991
Ajap1	9.75419	0.00376646	0.99991
Ajuba	980.51	0.0706431	0.99991
Ak1	124.787	0.0333597	0.99991
Ak2	1950.78	-0.00955044	0.99991
Ak3	1809.42	0.0452388	0.99991
Ak4	604.084	0.146363	0.99991
Ak5	17.7809	-0.00135544	0.99991
Ak7	134.517	0.0205058	0.99991
Ak8	48.3622	-0.00191423	0.99991
Akap1	732.042	0.0689529	0.99991
Akap10	672.815	0.0817847	0.99991
Akap11	3624.51	0.0244456	0.99991
Akap12	6600.88	-0.0531679	0.99991
Akap13	1919.83	0.000768356	0.99991
Akap14	0.530676	-0.00028853	NA
Akap17b	905.808	-0.0717791	0.99991
Akap2	510.448	-0.03071	0.99991
Akap3	14.4307	-0.0773692	0.870309
Akap4	6.47637	-0.00575333	0.99991
Akap5	124.608	0.0494942	0.99991
Akap6	16.3469	-0.00215023	0.99991
Akap7	885.149	-0.0884112	0.99991
Akap8	2855.95	0.00252756	0.99991
Akap8l	1460.76	-0.0616599	0.99991
Akap9	3271.76	0.0583263	0.99991
Akip1	415.631	0.0800522	0.99991
Akirin1	2163.02	-0.00132124	0.99991
Akirin2	1900.01	0.0055548	0.99991
Akna	83.6393	0.0533302	0.99991
Aknad1	2.01678	-0.00107106	NA
Akp3	1.22216	0.00210663	NA
Akr1a1	6301.16	0.00863592	0.99991
Akr1b10	353.29	0.061659	0.99991
Akr1b3	32.1032	-0.0229616	0.99991
Akr1b7	154.072	-0.00205842	0.99991
Akr1b8	3810.17	-0.060734	0.99991
Akr1c12	3.51228	-0.00237589	NA
Akr1c13	27.5818	-0.0417401	0.99991
Akr1c14	298.037	0.00918881	0.99991
Akr1c19	4.18117	0.012994	NA
Akr1c21	0.804013	-0.00366014	NA
Akr1c6	0.471492	-0.000278439	NA
Akr1cl	4024.36	0.118849	0.73811
Akr1d1	1.29456	-0.0101162	NA
Akr1e1	646.045	-0.0358241	0.99991
Akr7a5	978.31	-0.0259178	0.99991
Akt1	2211.64	-0.00196575	0.99991
Akt1s1	900.621	0.0204748	0.99991
Akt2	855.425	-0.131654	0.99991
Akt3	1300.88	0.0370162	0.99991
Aktip	1011.59	0.0515363	0.99991
Alad	1811.16	0.0350355	0.99991
Alas1	1812.28	-0.173672	0.802729
Alas2	113.534	-0.0706188	0.99991
Alb	3.00727	-0.0141751	NA
Alcam	1687.1	-0.210835	0.0737721
Aldh16a1	473.293	0.0398248	0.99991
Aldh18a1	687.606	-0.0447378	0.99991
Aldh1a1	21820.5	-0.0312992	0.99991
Aldh1a2	2253.82	-0.0144933	0.99991
Aldh1a3	291.454	0.0110924	0.99991
Aldh1a7	630.794	-0.04683	0.99991
Aldh1b1	914.37	-0.0546735	0.99991
Aldh1l1	238.71	-0.0557401	0.99991
Aldh1l2	21.5599	-0.00130418	0.99991
Aldh2	6124.84	-0.0746022	0.99991
Aldh3a1	197.907	0.0139214	0.99991
Aldh3a2	2586.05	0.0120246	0.99991
Aldh3b1	215.734	0.0372716	0.99991
Aldh3b2	2.14254	0.0139813	NA
Aldh4a1	364.611	0.0209737	0.99991
Aldh5a1	549.439	0.0262018	0.99991
Aldh6a1	2432.88	-0.0777382	0.99991
Aldh7a1	1391.15	-0.0343433	0.99991
Aldh9a1	2036.5	0.0221832	0.99991
Aldoa	4754.68	0.0420038	0.99991
Aldoart1	195.203	0.109555	0.99991
Aldoart2	17.1801	0.0225768	0.99991
Aldob	3.03724	0.00431725	NA
Aldoc	297.226	-0.0420608	0.99991
Alg1	687.463	0.0122499	0.99991
Alg10b	1476.74	0.0544509	0.99991
Alg11	765.073	-0.0108985	0.99991
Alg12	163.492	-0.0231281	0.99991
Alg13	1363.34	-0.176489	0.420515
Alg14	432.812	-0.0688483	0.99991
Alg2	998.278	0.0156387	0.99991
Alg3	358.311	-0.0543147	0.99991
Alg5	749.866	0.0431825	0.99991
Alg6	412.211	0.320957	0.0155639
Alg8	474.773	0.00939833	0.99991
Alg9	519.452	0.102244	0.99991
Alk	1.04306	-0.00714151	NA
Alkbh1	302.907	0.0223523	0.99991
Alkbh2	200.654	0.0425849	0.99991
Alkbh3	330.255	0.0765536	0.99991
Alkbh4	135.291	0.0574397	0.99991
Alkbh5	1701.95	-0.142611	0.737635
Alkbh6	494.85	0.0668554	0.99991
Alkbh7	222.328	0.0602406	0.99991
Alkbh8	332.271	0.0411213	0.99991
Alms1	1263.81	-0.196115	0.257854
Alms1-ps2	0.489783	0.00467692	NA
Alox12	52.2177	-0.0361065	0.99991
Alox12b	56.1984	-0.0529663	0.99991
Alox12e	3.85602	-0.00109194	NA
Alox15	4.79669	0.000385111	NA
Alox5	21.6412	-0.0514504	0.99991
Alox5ap	79.1629	-0.0297685	0.99991
Alox8	14.0565	0.049637	0.99991
Aloxe3	46.6782	-0.0199786	0.99991
Alpk1	159.974	-0.0214387	0.99991
Alpk2	3.81052	-0.00577586	NA
Alpk3	3.42466	0.00453563	NA
Alpl	423.769	-0.0612641	0.99991
Alppl2	0.996326	-0.00672727	NA
Als2	1033.48	0.0810192	0.99991
Als2cl	316.278	0.196493	0.584113
Als2cr11	116.713	-0.145243	0.981538
Als2cr12	2.04523	-0.00793165	NA
Alx1	8.81981	-0.0659925	0.788957
Alx3	2.86753	-0.00526223	NA
Alx4	12.589	-0.0234752	0.99991
Alyref	2104.76	-0.0119725	0.99991
Alyref2	198.758	-0.0413782	0.99991
Amacr	318.675	0.00950785	0.99991
Ambra1	786.615	-0.048294	0.99991
Amd1	11.2776	0.00324882	0.99991
Amdhd1	1.70687	-0.00918678	NA
Amdhd2	221.063	-0.00820022	0.99991
Amer1	488.117	0.0742038	0.99991
Amer2	0.955432	-0.000168403	NA
Amfr	4066.42	-0.00525033	0.99991
Amh	1362.26	-0.116646	0.99991
Amhr2	3380.14	-0.0268966	0.99991
Amica1	7.80272	-0.00732403	0.99991
Amigo1	157.441	0.0783187	0.99991
Amigo2	255.785	0.00879255	0.99991
Amigo3	26.8701	0.0091737	0.99991
Ammecr1	1023.06	-0.0196423	0.99991
Ammecr1l	776.05	-0.0860408	0.99991
Amn	14.241	-0.00430558	0.99991
Amn1	428.28	-0.1274	0.99991
Amot	704.848	0.0098843	0.99991
Amotl1	194.46	0.100579	0.99991
Amotl2	1439.83	-0.0119261	0.99991
Ampd1	3.21127	-0.00425023	NA
Ampd2	1123.08	0.0437575	0.99991
Ampd3	108.484	0.0424719	0.99991
Amph	15.0313	-0.00341151	0.99991
Amt	32.2114	0.0179339	0.99991
Amy1	45.062	-0.0868514	0.99991
Amz1	9.03935	0.0105036	0.99991
Amz2	875.572	-0.0715272	0.99991
Anapc1	4047.11	-0.0142653	0.99991
Anapc10	734.334	-0.100987	0.99991
Anapc11	941.074	-0.0566684	0.99991
Anapc13	912.109	-0.0328267	0.99991
Anapc15	609.222	-0.208666	0.396734
Anapc16	929.886	-0.0654793	0.99991
Anapc2	1679.31	0.00611606	0.99991
Anapc4	3422.43	0.000803551	0.99991
Anapc5	5828.52	-0.13467	0.33238
Anapc7	1111.51	-0.0184064	0.99991
Ang	24.4179	0.0145782	0.99991
Ang4	0.471492	-0.000278439	NA
Angel1	586.238	-0.0708423	0.99991
Angel2	2187.63	-0.0338447	0.99991
Angpt1	27.1937	-0.000568609	0.99991
Angpt2	115.493	0.0638391	0.99991
Angpt4	6.80381	0.00425725	0.99991
Angptl1	56.4157	0.0258474	0.99991
Angptl2	617.516	0.0603606	0.99991
Angptl4	656.786	0.0124285	0.99991
Angptl6	78.2894	0.0921013	0.99991
Angptl7	2.55101	-0.00740754	NA
Ank	724.436	-0.0582104	0.99991
Ank1	19.7197	-0.000655603	0.99991
Ank2	166.878	-0.0841739	0.99991
Ank3	483.421	-0.0894047	0.99991
Ankar	1.71347	-0.0149894	NA
Ankdd1b	19.5348	-0.0142735	0.99991
Ankef1	34.3966	0.013063	0.99991
Ankfy1	1775.01	0.0799324	0.99991
Ankhd1	2899.28	-0.296281	4.93204e-05
Ankib1	2815.75	-0.0237631	0.99991
Ankk1	1.6995	0.00828117	NA
Ankle1	65.9313	0.126964	0.99991
Ankle2	1449.35	-0.024199	0.99991
Ankmy1	14.9228	-0.0291657	0.99991
Ankmy2	498.069	-0.0485745	0.99991
Ankra2	1558.24	0.0116457	0.99991
Ankrd10	2462.24	0.0313617	0.99991
Ankrd11	3029.96	0.0535283	0.99991
Ankrd12	1994.73	0.011523	0.99991
Ankrd13a	5981.79	-0.0759039	0.99991
Ankrd13b	155.265	0.147975	0.99991
Ankrd13c	1269.02	0.0669625	0.99991
Ankrd13d	49.8857	0.133983	0.78906
Ankrd16	342.848	0.0499765	0.99991
Ankrd17	4053.42	-0.0257967	0.99991
Ankrd2	2.57743	-0.0300916	NA
Ankrd23	71.4708	0.0197413	0.99991
Ankrd24	215.817	-0.0116375	0.99991
Ankrd26	865.374	0.0261957	0.99991
Ankrd27	824.791	0.100661	0.99991
Ankrd28	2417.31	0.0832301	0.99991
Ankrd29	77.2128	-0.0528756	0.99991
Ankrd32	983.8	-0.0532547	0.99991
Ankrd33b	6.19872	-0.000142469	0.99991
Ankrd34a	7.40383	-0.00802498	0.99991
Ankrd34b	119.048	-0.0563587	0.99991
Ankrd34c	0.530676	-0.00028853	NA
Ankrd35	90.1808	0.117911	0.99991
Ankrd36	9.28114	-0.05185	0.99991
Ankrd37	94.8746	-0.0505135	0.99991
Ankrd39	219.694	-0.047905	0.99991
Ankrd40	1022.59	-0.0559149	0.99991
Ankrd42	278.616	-0.183561	0.73701
Ankrd44	414.683	0.038147	0.99991
Ankrd45	173.481	-0.0272854	0.99991
Ankrd46	1273.6	0.0464421	0.99991
Ankrd49	961.846	-0.121094	0.99991
Ankrd50	502.376	-0.0101182	0.99991
Ankrd52	597.446	0.188588	0.579342
Ankrd53	2.22078	0.00826695	NA
Ankrd54	651.583	-0.0240764	0.99991
Ankrd55	14.3235	0.004396	0.99991
Ankrd6	205.029	0.0638051	0.99991
Ankrd60	2.9138	-0.0122915	NA
Ankrd61	3.27324	0.000662584	NA
Ankrd63	48.2174	0.0583149	0.99991
Ankrd66	7.42672	0.00805451	0.99991
Ankrd7	1.96344	0.00553128	NA
Ankrd9	64.4747	0.0552937	0.99991
Anks1	580.77	0.00380433	0.99991
Anks1b	61.4087	-0.0293743	0.99991
Anks3	665.633	-0.0121759	0.99991
Anks6	108.716	0.119369	0.99991
Ankzf1	495.771	-0.0908177	0.99991
Anln	2515.74	0.0823981	0.99991
Ano1	321.625	-0.0456865	0.99991
Ano10	665.494	-0.0878296	0.99991
Ano2	1.99849	-0.00754079	NA
Ano3	13.1504	0.0142236	0.99991
Ano4	191.499	-0.122055	0.99991
Ano5	9.5954	-0.0285334	0.99991
Ano6	882.443	-0.0605219	0.99991
Ano7	3.7112	-0.0109979	NA
Ano8	109.509	0.156174	0.870309
Ano9	0.955432	-0.000168403	NA
Anp32a	2491.18	-0.0428176	0.99991
Anp32b	6485.79	-0.0904429	0.99991
Anp32e	3800.32	-0.0420335	0.99991
Anpep	178.628	0.161212	0.932031
Antxr1	1098.22	0.0543366	0.99991
Antxr2	351.896	0.0142805	0.99991
Anxa1	600.764	0.010647	0.99991
Anxa11	415.677	0.0820389	0.99991
[truncated: 18,150 more rows]
