# Supplementary material for: The conserved RNA helicase YTHDC2 regulates the transition from proliferation to differentiation in the germline
Source: eLife. 2017 Oct 31;6:e26116. doi: 10.7554/eLife.26116 (PMC5703642; doi:10.7554/eLife.26116)
Supplement: Figure 6—source data 2. [file elife-26116-fig6-data2.xlsx]

## Sheet: P14 - Diff exp transcripts
Figure 6 - Source Data 2. Differentially expressed transcripts in P14 Ythdc2-/- testes compared to wild type.
										Soumillon et al., 2013
Gene ID	baseMean	log2FoldChange	padj	wild type #1	wild type #2	Ythdc2 -/-	Ythdc2 -/-	Spermatogonia	Spermatocytes	Spermatids	Spermatozoa	Sertoli
17-qA3.3-26735	501.475	-3.83054	4.75751e-150	854.997	1139.35	4.85372	6.69841	0.610757	7598.47	2434.61	3.71094	0
Kctd19	456.332	-3.69865	1.27663e-142	804.981	1001.54	8.08954	10.7175	0.610757	57686.2	47550.1	21.0287	0
Ldhc	456.799	-3.52454	2.36995e-125	753.077	1053.95	12.1343	8.03809	22.598	680129	805811	1124.41	13.2373
Meiob	682.288	-2.97578	3.54377e-125	1170.19	1373.24	90.6028	95.1174	16.4904	1491.43	1257.97	94.0104	4.41243
Ythdc2	1403.69	-2.22104	3.10867e-118	2299.81	2462.12	421.465	431.377	1609.96	2485.33	1664.6	1270.38	781.001
Fabp9	309.72	-3.17783	1.03403e-98	537.912	683.221	9.70745	8.03809	4.88606	56812.1	88846.7	329.037	11.0311
1700102P08Rik	383.16	-3.02605	1.10692e-92	619.071	867.613	21.8418	24.1143	73.9016	22092.1	3955.58	131.12	42.6535
Setx	7312.09	-1.74731	1.98699e-92	10490.2	12573.6	3037.62	3146.91	10254.6	172959	60754.4	11533.6	3068.85
Pdcl2	279.62	-3.12189	4.75523e-92	475.628	633.727	2.42686	6.69841	0.610757	127505	193059	282.031	11.0311
Hfm1	1765.12	-1.83793	2.03128e-89	2716.93	2955.13	715.924	672.52	136.199	7866.45	4723.86	14.8438	0
Rad51ap2	745.132	-2.47633	1.54698e-87	1173.97	1494.55	147.23	164.781	10.3829	336.956	759.625	0	14.7081
Sycp2	7623.41	-1.55971	2.76951e-85	11250.9	11959.3	3398.41	3885.08	920.411	69454.8	27498.8	181.836	7.35406
Mroh4	208.1	-2.99266	1.84309e-82	385.975	446.423	0	0	0	62274.7	49148.9	42.0573	0
Gml	355.491	-2.78094	1.52041e-81	592.647	758.919	31.5492	38.8508	7.93984	2938.75	2585.15	1.23698	147.081
Cntd1	700.206	-2.31675	3.16064e-78	1124.9	1344.12	184.441	147.365	27.4841	18332.4	7819.46	1756.51	0
Spo11	336.128	-2.46246	1.43862e-66	579.435	658.959	44.4925	61.6253	32.3701	11070.9	5912.61	13.6068	0
Spata22	398.149	-2.32527	3.19881e-66	677.58	749.214	76.0417	89.7587	17.712	1216.66	481.038	0	0
Ptchd3	231.198	-2.58424	1.27013e-61	369.933	529.885	8.89849	16.0762	6.71833	8056.41	4410.67	7.42188	0
17-qA3.3-27363	183.44	-2.58876	1.02449e-60	313.31	410.515	3.23582	6.69841	0	2674.16	1129.92	0	0
Zfp541	384.066	-2.23721	3.88754e-59	631.339	741.45	89.7939	73.6825	49.4713	32589.7	36693.8	64.3229	3.67703
8-qC5-8200	157.762	-2.52762	4.09641e-57	272.731	356.168	0.808954	1.33968	0.610757	10670.6	1872.24	8.65886	0
Sycp3	7256.59	-1.24913	9.65499e-57	9745.65	11046.1	4068.23	4166.41	632.134	25090.8	12157.5	17.3177	58.8324
2610020H08Rik	1745.16	-1.64418	1.64844e-56	2446.08	3038.59	772.551	723.428	232.699	14518.5	13870.5	526.953	203.707
Adam2	159.344	-2.48626	1.54575e-55	279.337	351.315	4.04477	2.67936	1.83227	93981.3	73084.9	154.622	0
8-qC5-2209	150.752	-2.47023	1.60702e-54	263.294	336.758	1.61791	1.33968	0	9507.13	1605.77	6.1849	0
1700006A11Rik	143.819	-2.43572	8.6212e-53	247.251	328.024	0	0	0	20552.1	2031.43	2.47396	0
Hormad1	2020.48	-1.42491	9.9844e-53	2826.4	3221.04	978.834	1055.67	86.7275	6949.43	2931.22	1.23698	0
Trim52	844.03	-1.73428	1.01032e-51	1233.42	1485.81	321.964	334.92	71.4586	1183.87	2920.83	7.42188	9.56027
Ybx2	683.12	-1.82748	3.80134e-50	1004.1	1249.98	230.552	247.841	99.5534	146001	169099	860.938	2.20622
Piwil1	364.742	-2.10871	5.92344e-49	553.955	742.421	76.8506	85.7396	72.0694	62600.3	6312.32	11.1328	0
Tktl2	653.095	-1.92542	7.94226e-48	922	1296.57	202.238	191.574	173.455	10437.7	6468.06	0	0
Morc2b	126.804	-2.27903	3.65312e-46	232.152	270.765	1.61791	2.67936	3.66454	54442.1	58994.6	27.2136	1.47081
Tsga10	481.368	-1.79534	4.32146e-46	759.683	829.764	173.925	162.101	445.242	43445.8	71472.2	3691.15	174.291
7-qB5-6255	120.741	-2.26764	1.20259e-45	217.052	265.913	0	0	0	19970.9	4517.95	27.2136	0.735406
Clgn	810.353	-1.74492	2.36062e-45	1152.26	1487.75	275.853	325.543	221.705	210261	223290	194.206	2.20622
Spdya	733.325	-1.57774	1.34882e-43	1084.32	1213.11	304.976	330.901	28.7056	25728.5	17891.8	59.375	19.856
Hemt1	228.726	-2.12492	3.74539e-43	358.608	487.183	39.6387	29.473	13.4367	1185	1392.93	2.47396	21.3268
Gm11837	658.102	-1.69912	1.00822e-41	937.099	1197.58	237.832	259.898	160.018	51607.4	66641.1	54.4271	32.3578
Spata4	122.432	-2.14498	8.11083e-41	201.009	286.293	2.42686	0	3.05379	127403	152200	330.274	30.887
Psma8	764.197	-1.62489	1.08734e-40	1067.33	1369.35	310.638	309.466	588.159	32348.9	7945.78	7.42188	223.563
4-qB3-3994	116.319	-2.12592	3.65323e-40	190.628	274.647	0	0	1.22151	24363.7	5653.06	4.94792	0
Atr	5848.41	-0.982205	9.92387e-40	7773.3	7976.41	3955.78	3688.14	4788.34	67949.8	21200.3	5965.95	1625.98
Mtl5	968.856	-2.08219	4.83266e-39	1559.94	2085.57	129.433	100.476	21.3765	16634.1	5903.96	16.0807	56.6262
Sycp1	9631.19	-1.12077	1.2099e-38	12353.1	14573.8	5521.11	6076.8	3166.78	50292.4	39382.8	56.9011	27.9454
9-qC-31469	121.58	-2.07448	3.44889e-38	210.446	265.913	7.28058	2.67936	0.610757	5799.49	1219.9	2.47396	0
6-qC3-6258	102.954	-2.07171	3.79674e-38	187.797	223.211	0.808954	0	3.66454	28516.9	5744.77	39.5833	0.735406
14-qA3-19970	118.465	-2.03289	1.04013e-36	234.983	225.152	9.70745	4.01904	0	10521.4	1481.18	8.65886	0
Pdha2	510.892	-1.69203	8.20755e-36	712.498	969.514	186.059	175.498	251.021	17568.1	13595.4	7.42188	0
7-qD2-11976	98.5735	-1.98056	7.21132e-35	178.36	213.507	2.42686	0	3.66454	26711.1	2768.56	12.3698	0
13-qB1-1517	144.936	-1.97509	8.36787e-35	232.152	318.319	10.5164	18.7555	15.2689	13056.5	5338.14	18.5547	2.20622
Glipr1l2	153.674	-1.97532	9.49927e-35	229.32	357.138	16.1791	12.0571	6.71833	8395.63	2232.15	3.71094	0
Tex101	5605.17	-1.1143	1.44761e-34	7043.82	8646.05	3366.87	3363.94	548.46	23170.8	11827	4.94792	0
Ccnb3	673.175	-1.48152	2.12456e-34	1001.27	1091.8	335.716	263.917	90.3921	110.811	519.106	1.23698	1.47081
Ccdc79	458.294	-1.54685	3.63191e-34	710.61	738.539	180.397	203.632	74.5124	8490.61	4163.23	395.833	154.435
Msh4	313.784	-1.71043	8.23324e-34	488.839	558.029	97.0745	111.194	40.9207	1869.09	2450.18	154.622	0.735406
Fhl4	267.706	-1.83306	1.52133e-33	386.919	552.206	64.7163	66.9841	15.2689	116967	180993	2769.6	79.4238
Hsf5	310.239	-1.69437	6.82287e-33	483.177	553.176	110.827	93.7777	21.9873	35356.6	28905.5	86.5886	12.5019
Stk33	287.325	-1.74185	1.00131e-32	432.217	543.471	82.5133	91.0983	101.996	52076.7	51993.6	89.0625	3.67703
6-qF3-8009	88.6183	-1.90961	1.15849e-32	162.317	192.156	0	0	0.610757	27214.3	3341.31	14.8438	0
uc009fks.1	947.431	-1.24704	2.72123e-32	1403.29	1352.86	486.99	546.59	48.8606	329.041	619.466	14.8438	0
Tcam1	377.215	-1.60031	3.06866e-32	596.422	623.051	128.624	160.762	84.8953	34785.6	7930.2	165.755	12.5019
Brdt	1413.63	-1.22281	1.3854e-31	1846.83	2244.73	772.551	790.412	456.236	34111.7	37816.8	304.297	396.384
5-qG3-23659	101.274	-1.87597	3.02294e-31	174.585	220.3	4.85372	5.35873	0	2937.62	489.69	1.23698	0
Mlc1	282.747	-1.69908	3.60131e-31	423.724	529.885	84.9401	92.438	40.31	6950.56	1550.4	1.23698	3.67703
Phf7	758.234	-1.36065	4.50995e-31	1053.18	1236.4	396.387	346.977	500.21	202140	277580	1168.95	583.912
Adad1	568.472	-1.41713	6.60092e-31	816.305	926.813	250.776	279.993	138.642	19866.8	37709.6	12.3698	1.47081
10-qA3-2592	81.8113	-1.82399	6.55984e-30	158.543	167.894	0.808954	0	7.32909	29090.2	3870.8	7.42188	0
14-qA3-3095	87.8951	-1.8284	6.55984e-30	157.599	190.215	2.42686	1.33968	0	16144.5	1571.16	1.23698	1.47081
Cers3	372.39	-1.78846	8.00792e-29	626.62	825.883	12.9433	24.1143	288.888	21000.9	4021.34	388.412	33.0933
4922502D21Rik	87.3955	-1.78646	8.04746e-29	142.5	205.743	0	1.33968	0	146871	220355	272.136	0
17-qA3.3-352	83.292	-1.78739	1.23702e-28	156.655	172.746	2.42686	1.33968	3.05379	23402.6	2154.29	6.1849	0
Ccdc152	284.704	-1.57364	1.49178e-27	429.386	504.652	96.2655	108.514	183.838	866.135	1361.79	18.5547	35.2995
Crisp2	91.9428	-1.72316	1.05525e-26	141.556	220.3	3.23582	2.67936	1.22151	168187	278978	5003.58	80.8946
Cox8c	178.566	-1.67639	4.7704e-26	263.294	366.843	41.2566	42.8698	20.155	51437.8	29696.3	45.7682	13.2373
Spesp1	139.873	-1.69833	8.42141e-26	211.39	298.909	25.0776	24.1143	3.66454	27861.1	47806.2	28.4505	0
9-qC-10667	84.6304	-1.68992	1.20312e-25	140.612	191.185	4.04477	2.67936	1.83227	5107.48	1131.65	4.94792	0
15-qD1-17920	80.1669	-1.68744	1.42483e-25	144.387	169.835	2.42686	4.01904	0	16109.4	1550.4	8.65886	4.41243
Cox7b2	844.165	-1.15438	3.14611e-25	1127.73	1291.72	486.99	470.228	470.894	37896.2	26600.7	23.5026	7.35406
Iqcb1	2570.7	-0.896974	7.52164e-25	3228.42	3582.06	1709.32	1763.02	1641.1	7215.15	4047.29	1604.36	2017.95
Rad21l	370.284	-1.35688	2.58534e-24	561.505	577.438	174.734	167.46	156.965	217.099	399.711	0	13.9727
Ly6k	1445.57	-1.0215	5.94947e-24	1836.45	2144.77	883.378	917.682	8.5506	6479.05	5743.04	11.1328	847.923
Mdc1	3006.92	-0.8858	1.20452e-23	3796.53	4147.85	1927.74	2155.55	3371.99	39705.4	16812.1	10844.6	1663.49
Fbxo47	310.57	-1.42344	1.31276e-23	487.896	497.859	143.994	112.533	43.9745	230.668	749.242	284.505	30.887
1700019A02Rik	104.228	-1.63136	1.53427e-23	171.754	216.418	11.3254	17.4159	22.598	33315.7	54987.1	38.3464	4.41243
4930524B15Rik	388.371	-1.45345	2.10609e-23	542.631	707.483	178.779	124.59	7.32909	7487.66	3526.46	7.42188	0
Rnls	238.752	-1.4995	6.63065e-23	351.058	435.748	74.4237	93.7777	10.3829	10705.7	2524.58	22.2656	30.1516
Cox6b2	324.006	-1.39697	1.87172e-22	454.866	566.763	131.051	143.346	92.8351	8414.85	9020.33	128.646	47.066
Stag3	3860.44	-0.754572	3.14154e-22	4911.99	4900.95	2743.16	2885.67	3373.21	74626.7	70302.5	65.5599	63.2449
Cdkl2	858.927	-1.14575	4.15329e-22	1150.38	1316.95	431.172	537.212	568.615	18756.5	16737.7	3266.86	708.196
BC049730	103.821	-1.57815	4.74226e-22	186.854	192.156	16.1791	20.0952	1.83227	10727.2	1226.82	2.47396	0
Ccdc39	415.209	-1.301	8.16742e-22	581.323	681.28	181.206	217.028	1024.24	102197	62451.9	86.5886	101.486
10-qC1-117	66.772	-1.53982	9.84942e-22	125.513	137.809	2.42686	1.33968	0	1057.23	489.69	0	0
Nol8	3213.43	-0.901083	1.27273e-20	3905.05	4654.44	2020.77	2273.44	4197.12	66149.7	46681.4	2182.03	3131.36
Wdr35	924.585	-1.01795	1.5417e-20	1194.73	1365.47	580.829	557.307	1537.89	33345.1	29042.2	2426.95	1272.99
Sdk1	504.392	-1.20044	3.73018e-20	668.143	821.03	256.438	271.955	602.207	228.406	771.737	1055.14	178.704
Dmrtc2	321.443	-1.30093	4.2913e-20	486.952	504.652	164.218	129.949	9.16136	8522.27	6608.21	9.89584	0
Tdrd9	1682.2	-0.830373	4.2913e-20	2173.35	2211.73	1148.71	1195	748.178	17078.5	9705.55	34.6354	0.735406
Zmynd10	74.004	-1.48757	4.38055e-20	119.851	165.953	4.85372	5.35873	168.569	48200.5	19750.2	123.698	3.67703
Sox30	206.133	-1.39731	1.08094e-19	308.592	360.05	76.8506	79.0412	25.041	7629	18388.5	34.6354	8.82487
Stk31	3005.58	-0.749826	1.13549e-19	3692.72	3952.78	2205.21	2171.62	2632.36	24499.4	7284.78	13.6068	10.2957
1700020N01Rik	418.016	-1.46423	1.659e-19	620.014	964.662	48.5372	38.8508	58.6327	10397	7300.36	11.1328	7.35406
Ankrd36	70.9909	-1.45591	1.99235e-19	117.963	158.189	6.47163	1.33968	3.05379	52716.6	72879	116.276	0.735406
Ccdc155	258.129	-1.37948	2.45007e-19	349.171	482.331	93.8386	107.175	40.9207	10590.4	8117.08	115.039	2.20622
Hspa5	25962.2	-0.671924	2.45007e-19	30483.6	33978.6	19856.6	19529.9	55613.7	78689.4	70442.6	49689.5	85764.5
Pet2	977.535	-1.08199	3.02672e-19	1200.39	1573.16	548.471	588.12	456.846	237.452	1505.41	2.47396	2.94162
Hspa2	1954.89	-1.3642	3.78277e-19	2665.02	3585.94	774.169	794.431	1412.68	184178	166629	1397.79	3567.45
Ropn1l	308.761	-1.30446	3.86183e-19	435.048	526.003	152.083	121.911	156.354	205271	299270	989.584	565.527
Cep290	1397.51	-0.886695	3.94159e-19	1789.27	1922.53	888.231	990.025	3165.55	35401.9	104847	10741.9	1235.48
Ccdc108	77.2027	-1.45535	5.33318e-19	138.725	152.366	5.66268	12.0571	469.062	61955.8	33042.8	72.9818	0
11-qE1-9443	74.146	-1.43363	8.78431e-19	121.738	163.041	2.42686	9.37777	4.2753	6508.45	825.378	13.6068	4.41243
15-qD3-14639	79.7156	-1.42845	2.32445e-18	134.006	167.894	12.9433	4.01904	0	6071.99	714.635	2.47396	0
Ccdc18	725.687	-1.00171	3.11912e-18	946.536	1061.71	441.689	452.812	854.449	5807.4	11043.1	614.779	307.4
A330021E22Rik	229.795	-1.32256	3.59267e-18	332.184	396.928	100.31	89.7587	1451.16	42667.9	83640	315.43	1723.79
Tdrd5	721.093	-1.01204	4.83072e-18	930.494	1073.36	434.408	446.114	841.623	17275.2	1934.53	3.71094	72.0697
Inca1	376.295	-1.15577	4.98341e-18	556.786	547.353	201.429	199.613	81.2307	1070.8	863.446	466.341	127.225
Tex12	931.282	-0.912896	1.00822e-17	1201.34	1302.39	613.187	608.215	142.917	1472.2	648.882	1.23698	0
11-qE1-3997	52.2152	-1.34053	2.03552e-17	95.3142	113.547	0	0	0	3837.68	1188.75	4.94792	0
Hdgfl1	81.3651	-1.38464	3.33247e-17	123.625	179.54	8.89849	13.3968	16.4904	30347.5	30914.5	24.7396	0
Urb1	1598.73	-0.794588	3.33247e-17	1983.67	2152.54	1137.39	1121.31	2996.99	11801.4	4941.89	1235.74	187.528
H2-K1	2637.64	-0.710915	4.12542e-17	3224.64	3418.05	1982.75	1925.12	7422.53	5507.76	3457.24	10683.8	7189.32
Hsf2bp	508.138	-1.08307	4.39605e-17	667.2	789.004	297.695	278.654	421.423	11545.8	7125.59	80.4037	11.0311
Dnahc8	424.144	-1.11687	4.55157e-17	611.521	617.228	211.946	255.879	381.723	206060	84119.3	117.513	9.56027
14-qA3-284	53.3863	-1.32822	7.62935e-17	102.864	107.724	1.61791	1.33968	0.610757	8004.4	7443.97	86.5886	1.47081
Tmem194	995.818	-0.904655	9.01574e-17	1266.45	1411.08	686.802	618.933	789.098	15325.8	11191.9	984.636	219.886
Dopey1	1431.97	-0.811401	1.12075e-16	1780.77	1948.73	1025.75	972.609	1951.98	4318.24	2507.28	5013.48	613.328
Pabpc1	5290.62	-0.694503	1.39392e-16	6199.2	7057.36	3905.63	4000.29	80461.2	381946	427222	21582.8	105133
Pbx3	513.331	-1.03792	1.39475e-16	697.398	752.126	317.11	286.692	487.995	521.264	657.534	523.242	833.95
Rpl10l	786.827	-0.919844	1.41936e-16	1043.74	1080.15	490.226	533.193	1004.08	38590.5	40265.3	44.5313	0
Sycp1-ps1	1100.54	-0.964604	1.47946e-16	1359.88	1657.59	631.793	752.901	180.784	3919.09	3713.34	6.1849	0
Meig1	736.446	-1.0694	6.16057e-16	882.365	1225.72	399.623	438.076	185.67	218465	346541	372.331	294.162
Beta-s	3399.99	-0.827766	7.72332e-16	4436.36	4483.64	2643.66	2036.32	700.539	1.13072	0	127.409	0
Dnajc3	2319.42	-0.743151	9.53831e-16	2779.21	3133.7	1730.35	1634.41	5269	9065.02	4403.75	8128.19	10133.2
Arhgap33	416.877	-1.06251	1.9382e-15	555.842	638.579	238.641	234.444	174.677	3878.39	5050.9	305.534	37.5057
Mov10l1	2768.06	-0.706538	2.54977e-15	3275.6	3697.55	2054.74	2044.35	2370.96	7872.1	4327.61	4.94792	0
Efcab2	639.567	-1.02981	2.82155e-15	791.769	1015.13	349.468	401.904	306.6	19031.2	24641.9	1157.81	303.722
Gk2	49.2161	-1.23788	5.40374e-15	90.5957	103.842	2.42686	0	15.8797	70969.9	99735.8	199.154	5.88324
Ccdc96	99.1648	-1.30248	5.58227e-15	139.668	211.566	22.6507	22.7746	402.489	68869	105712	127.409	154.435
Abca5	1077.39	-0.791972	9.0165e-15	1402.35	1394.59	775.787	736.825	1550.71	6968.66	3929.63	25371.7	635.39
Ttc26	214.857	-1.18604	9.59957e-15	318.972	339.67	100.31	100.476	494.713	4995.54	2725.3	486.133	255.921
Spata1	525.134	-0.957132	1.18097e-14	715.329	730.775	315.492	338.939	319.426	54792.7	86969.2	1145.44	295.633
7-qD2-24830	54.9053	-1.24431	1.29927e-14	97.2017	113.547	4.85372	4.01904	0	10331.4	1079.74	1.23698	0.735406
Rnf32	212.104	-1.21298	1.51963e-14	288.774	376.548	98.6924	84.3999	42.753	26252	26069.5	324.089	15.4435
6-qF3-3040	306.67	-1.09799	1.60566e-14	425.611	472.626	160.982	167.46	92.2243	2760.1	991.492	33.3984	9.56027
10-qB4-6488	96.4842	-1.27965	1.85811e-14	157.599	175.658	25.8865	26.7936	6.10757	25467.3	2112.76	28.4505	27.21
Syce3	342.244	-1.10583	2.1747e-14	451.091	555.117	165.836	196.933	51.3036	2762.36	7478.58	4.94792	0
5-qF-14224	54.4655	-1.22777	3.47385e-14	103.808	103.842	4.85372	5.35873	1.22151	20449.2	3635.47	4.94792	0.735406
Efcab7	420.527	-1.03959	3.93018e-14	539.799	663.812	246.731	231.765	484.331	4752.44	1759.77	434.18	320.637
4933416C03Rik	718.912	-0.999773	4.43771e-14	858.772	1160.7	398.005	458.171	84.8953	40710.6	30385	42.0573	0
Tex16	1224.19	-0.745878	4.47744e-14	1591.09	1539.19	880.951	885.529	374.394	271.374	1053.78	0	0
Dmc1	2010.73	-0.71589	4.75052e-14	2449.86	2635.84	1393.83	1563.41	352.407	751.932	1827.25	40.8203	23.533
Zbtbd6	326.27	-1.05635	6.48317e-14	449.204	493.006	182.015	180.857	78.1769	4128.28	1209.52	44.5313	57.3616
Tbc1d1	1106.01	-0.763394	8.81415e-14	1380.64	1466.4	787.921	789.072	16462.4	17259.4	11288.8	37511.4	2688.64
1700052N19Rik	802.956	-0.885984	1.20091e-13	976.735	1185.93	534.718	514.438	556.4	25548.7	13782.3	878.255	1550.97
2-qF1-2536	43.1362	-1.15117	1.29832e-13	75.4964	97.0485	0	0	0	15244.4	896.322	2.47396	0
Ddx4	5613.85	-0.566864	1.39317e-13	6577.63	6951.58	4451.67	4474.54	3920.45	65689.4	73567.7	85.3516	117.665
Nup210l	124.757	-1.22388	1.50006e-13	197.234	212.536	47.7283	41.5301	311.486	13585.7	15104.2	353.776	32.3578
Sugp2	920.045	-0.819589	1.56208e-13	1130.56	1286.86	627.748	635.009	942.398	36950.9	33729.8	5659.18	545.671
Cbwd1	1446.13	-0.733887	1.69045e-13	1753.4	1931.26	1016.05	1083.8	2772.23	9327.35	9574.04	1464.58	5107.39
Smpd5	96.1558	-1.23628	1.72338e-13	144.387	187.304	23.4597	29.473	19.5442	18659.2	8072.09	59.375	44.8597
Ccdc158	297.789	-1.0755	1.87504e-13	398.244	473.597	158.555	160.762	162.461	22204	35261.1	168.229	91.1903
Dkkl1	87.8339	-1.23289	2.01424e-13	142.5	162.071	22.6507	24.1143	122.151	152875	202469	1697.14	2.20622
Lrrc6	77.6502	-1.22421	2.07238e-13	117.963	160.13	13.7522	18.7555	133.145	14629.3	23345.9	30.9245	26.4746
Lrrc48	199.008	-1.18762	2.17473e-13	296.323	329.965	63.9073	105.835	677.33	30198.3	23664.3	311.719	72.8052
Fbxo15	181.803	-1.17965	3.32098e-13	242.532	330.935	76.0417	77.7015	50.6929	1079.84	1069.36	3.71094	19.856
Hormad2	436.645	-0.956304	5.70416e-13	575.66	636.638	255.629	278.654	53.7466	1162.38	785.58	70.5078	1.47081
Cep72	721.911	-0.816913	6.58265e-13	949.368	949.134	493.462	495.682	293.774	23493.1	25339.3	481.185	114.723
Smc1b	6448.59	-0.636901	7.50342e-13	7446.78	8467.48	4666.05	5214.04	3462.99	41176.5	66128.9	103.906	66.1865
Dnahc7a	41.0115	-1.10829	1.12376e-12	80.215	82.4912	0	1.33968	26.2626	10399.3	7063.3	30.9245	2.20622
Kdm3a	2593.02	-0.644838	1.13461e-12	3083.09	3340.41	2063.64	1884.93	7122.04	47733.5	30054.5	8536.4	6875.31
Mcmdc2	104.235	-1.19399	1.19332e-12	165.148	182.451	33.1671	36.1714	20.7657	902.318	306.272	21.0287	8.82487
Mpp5	1846.9	-0.657285	1.42168e-12	2209.21	2382.54	1378.46	1417.38	4562.97	6508.45	11790.6	12371	3156.36
Fam216a	926.402	-0.848098	1.49575e-12	1104.14	1366.44	649.59	585.441	520.365	14437.1	8899.2	275.846	940.584
Msh5	231.242	-1.10025	2.36248e-12	342.565	353.256	93.8386	135.308	130.702	1041.4	1247.58	212.76	22.7976
Cenpq	1010.66	-0.755768	4.74735e-12	1245.69	1356.74	681.948	758.26	731.687	4008.42	1176.64	231.315	1295.05
Gm364	3995.54	-0.553561	4.89607e-12	4711.92	4889.3	3248.76	3132.18	295.607	720.272	2396.54	0	0
Ptbp2	2153.06	-0.613012	5.74224e-12	2586.7	2693.1	1702.04	1630.39	4867.12	19121.7	6109.87	4168.62	2243.72
Urb2	870.178	-0.768226	6.40753e-12	1091.87	1164.58	641.5	582.761	2787.5	12112.3	5827.83	1786.2	562.585
Dnpep	1446.03	-0.679786	7.23847e-12	1726.04	1902.15	1073.48	1082.46	1780.97	12727.4	7921.55	6324.68	5723.66
Slc2a3	591.827	-0.86139	7.98251e-12	731.372	858.879	385.871	391.187	985.762	235191	49621.3	24482.3	765.557
Uggt2	366.299	-0.964868	8.66372e-12	473.74	556.088	206.283	229.086	818.415	7272.82	2654.36	1149.15	1145.76
Pbx4	70.2483	-1.14255	1.03098e-11	119.851	128.104	12.9433	20.0952	70.8478	8798.17	6300.21	37.1094	100.015
Spag17	47.3735	-1.07352	1.26887e-11	72.6653	110.635	4.85372	1.33968	240.638	55170.3	70745.4	529.427	25.0038
Senp2	1545.24	-0.657275	1.86916e-11	1835.51	2014.73	1174.6	1156.15	6592.51	47845.5	27704.7	8833.27	4170.48
Fnip1	2214.66	-0.635846	1.93705e-11	2657.47	2823.14	1791.83	1586.18	2909.04	11121.8	10937.6	4716.6	3159.3
Grk4	265.029	-1.00654	1.93705e-11	357.664	407.604	144.803	150.044	161.24	21877.3	26072.9	665.495	237.536
Pde1c	121.286	-1.12867	2.5322e-11	166.092	229.034	40.4477	49.5682	182.616	36736.1	32528.9	7194.27	5.14784
Tc2n	501.881	-0.845187	2.59453e-11	670.031	672.546	326.008	338.939	102.607	490.734	1448.3	337.695	3.67703
Syngr4	197.928	-1.08922	2.95411e-11	252.913	358.109	100.31	80.3809	17.1012	12180.2	10416.7	9.89584	5.14784
Piwil2	4142.95	-0.578533	3.12593e-11	4879.9	5171.71	3446.95	3073.23	3070.89	19388.5	6433.45	679.102	65.4511
Ube2t	1204.46	-0.737121	3.12593e-11	1425.94	1667.29	910.073	814.526	177.73	5573.34	1003.6	60.612	119.136
Diablo	2940.85	-0.585574	3.49489e-11	3395.45	3754.81	2333.02	2280.14	766.5	28746.4	9376.78	734.766	1306.82
Asb1	688.419	-0.814512	4.01463e-11	840.841	982.131	488.608	442.095	1130.51	7809.91	9494.44	737.24	638.332
D1Pas1	696.712	-0.816719	4.15359e-11	841.785	1004.45	487.799	452.812	649.235	40654.1	40391.6	833.724	5.88324
1700010I14Rik	148.046	-1.10413	4.41515e-11	193.46	275.618	61.4805	61.6253	50.0821	107239	115176	632.097	498.605
12-qE-7089	47.2248	-1.03466	4.45465e-11	65.1157	118.399	4.04477	1.33968	0.610757	9472.08	792.501	2.47396	0
Parp12	1845.32	-0.604398	4.5565e-11	2246.96	2270.93	1467.44	1395.95	1481.7	1832.9	1503.68	1672.4	856.747
Ccp110	2756.29	-0.559913	4.83041e-11	3246.35	3397.67	2210.87	2170.28	1886.02	45348.8	6632.44	4315.82	255.186
7-qF3-3125	47.9979	-1.02577	9.51461e-11	66.0594	118.399	4.85372	2.67936	3.05379	6274.39	1207.79	9.89584	0.735406
4933415F23Rik	44.4939	-1.03448	1.00524e-10	75.4964	94.137	5.66268	2.67936	1.22151	58365.7	96937.8	8169.01	8.08946
Ube2u	55.2923	-1.06485	1.01547e-10	84.9335	117.429	8.08954	10.7175	23.8195	21583.3	26886.2	12.3698	37.5057
Ccdc60	56.6052	-1.03992	1.12804e-10	78.3275	134.897	10.5164	2.67936	160.629	66966	92504.6	97.7214	0
2210404O07Rik	108.336	-1.09007	1.60672e-10	130.231	237.769	37.2119	28.1333	133.756	96454.2	131752	1000.72	304.458
4932438A13Rik	6283.59	-0.546399	2.04777e-10	7838.42	7241.76	4743.71	5310.5	6787.35	33417.4	20194.9	47440.6	2918.82
Pomt1	615.248	-0.784339	2.25566e-10	758.739	854.997	427.937	419.32	503.875	43336.2	28966.1	2324.28	1717.91
Zfp654	1046.79	-0.711601	2.50933e-10	1262.68	1408.17	808.954	707.352	1491.47	31768.8	55328	3316.34	1106.79
9-qA1-178	78.0605	-1.07879	2.55044e-10	117.963	147.514	22.6507	24.1143	6.10757	5123.31	832.299	1.23698	5.88324
4930404A10Rik	50.8168	-1.03536	2.98325e-10	83.9898	102.871	9.70745	6.69841	0.610757	1970.85	1264.89	0	0
Zfy2	81.3391	-1.07419	3.04558e-10	125.513	150.425	18.6059	30.8127	12.8259	202.4	1316.8	0	0
Mael	5070.48	-0.534865	3.14827e-10	5713.19	6414.9	4085.22	4068.61	1814.56	89629.1	114061	71.7448	5.88324
2-qE1-35981	59.3543	-1.03893	4.02906e-10	83.9898	130.045	11.3254	12.0571	23.2088	4533.07	659.264	12.3698	47.8014
Bub1	3668.25	-0.537429	4.02906e-10	4202.32	4582.63	3011.73	2876.3	1117.08	6070.86	9606.91	70.5078	268.423
Rfx2	175.457	-1.03423	4.02906e-10	235.926	298.909	94.6476	72.3428	326.144	28875.3	35629.7	930.209	38.9765
Rfx4	38.724	-0.974884	4.13352e-10	62.2846	88.3141	1.61791	2.67936	2.44303	8321	9864.74	16.0807	0
Ipo5	2719.53	-0.567616	4.24399e-10	3249.18	3335.56	2269.12	2024.26	24732	73764	190186	13359.4	18489.6
Morn5	58.2495	-1.04455	4.25594e-10	91.5394	116.458	12.9433	12.0571	47.6391	16362.7	18545.9	27.2136	0.735406
AA467197	242.373	-0.96234	4.3506e-10	322.747	373.637	139.14	133.968	72.6801	12356.6	9084.35	8.65886	642.009
Lrrc46	130.156	-1.05972	4.81737e-10	169.867	244.562	56.6268	49.5682	156.354	101693	149932	231.315	60.3033
Trpd52l3	91.9041	-1.06496	5.15602e-10	138.725	163.041	32.3582	33.492	5.49682	11574.1	9653.63	16.0807	0
Spa17	418.923	-0.93162	1.21649e-09	469.965	718.159	241.068	246.501	826.355	116884	362178	3839.58	1294.31
Rnpc3	2260.04	-0.534156	1.30634e-09	2693.34	2715.42	1820.15	1811.25	3166.78	3724.61	2638.79	8860.48	4069.73
4-qB3-639	34.9161	-0.93355	1.31892e-09	63.2283	73.7568	0	2.67936	3.05379	3873.86	560.634	201.628	0
Boll	520.183	-0.797081	1.42231e-09	633.226	744.362	349.468	353.676	139.253	7900.37	5858.97	8.65886	8.08946
Als2cr12	32.8037	-0.91265	1.90329e-09	55.6786	74.7273	0.808954	0	58.0219	31329	33691.7	189.258	47.8014
Agbl2	180.535	-0.996232	2.17728e-09	226.489	316.378	88.176	91.0983	126.427	27234.6	10581.1	22.2656	289.75
Wdr65	66.5399	-1.01315	2.17728e-09	97.2017	135.868	21.0328	12.0571	259.572	62042.9	54348.6	119.987	0
Lca5l	204.996	-0.963092	2.43962e-09	272.731	327.053	119.725	100.476	166.126	43933.2	48787.3	706.315	90.4549
Cetn1	62.0338	-1.00671	2.97044e-09	96.2579	119.37	13.7522	18.7555	14.0474	90687.5	112229	150.912	2.94162
uc007xer.1	34.1225	-0.904319	3.38548e-09	53.7912	80.5502	0.808954	1.33968	3.66454	15761.2	9432.15	13.6068	7.35406
Zcwpw1	2906.21	-0.539474	3.97046e-09	3344.49	3624.76	2221.39	2434.2	1946.48	2662.86	2380.96	2972.46	208.12
Stxbp5l	162.957	-0.978972	4.69824e-09	215.165	272.706	80.8954	83.0603	76.3447	139.079	744.051	79.1667	2.94162
Ift122	957.243	-0.69553	4.92405e-09	1097.53	1338.3	696.509	696.634	1302.13	35248.1	31648.1	2998.44	826.596
1700003M02Rik	59.6951	-0.989259	5.30037e-09	95.3142	112.576	12.1343	18.7555	651.678	86489.1	149437	128.646	77.2176
Trmt10a	860.681	-0.690818	5.30037e-09	1031.47	1151.97	588.109	671.18	1917.78	22513.9	21587.9	3384.38	1912.79
Iqcg	260.232	-0.920892	5.41439e-09	322.747	418.279	139.14	160.762	563.729	34776.6	26747.8	628.386	305.929
Mak	90.832	-1.00797	5.65965e-09	123.625	174.687	27.5044	37.5111	401.268	9751.37	26119.7	14.8438	0
4930432K21Rik	249.348	-0.9014	5.68005e-09	340.678	360.05	135.904	160.762	153.911	8732.59	10150.2	696.419	38.9765
Ero1lb	605.774	-0.769603	6.01378e-09	729.484	864.702	449.778	379.13	356.682	16198.8	18367.7	864.649	227.24
Maoa	590.851	-0.729776	6.01378e-09	726.653	799.679	427.128	409.943	1437.72	225.014	1072.82	907.943	13004.9
Mroh2b	35.4423	-0.91044	6.91539e-09	68.8905	66.9634	3.23582	2.67936	0	63947	82565.5	211.524	1.47081
Rimklb	1533.44	-0.568267	6.91998e-09	1802.48	1915.74	1192.4	1223.13	1040.12	13165	10809.5	53.1901	5.14784
Ccdc176	191.084	-0.957115	7.23443e-09	242.532	320.26	93.0297	108.514	282.17	103816	118576	520.768	529.492
Lrriq3	153.76	-0.978232	7.44846e-09	198.178	266.883	73.6148	76.3618	32.3701	15330.4	16627	231.315	38.2411
Odf2l	1025.18	-0.630196	7.90642e-09	1246.63	1295.6	742.62	815.866	3113.64	14183.8	14931.2	11899.7	2604.81
Ccdc111	768.918	-0.668972	8.1378e-09	948.424	987.953	552.515	586.78	415.926	455.682	853.064	7582.68	876.603
Gpat2	1405.55	-0.576134	8.46861e-09	1711.88	1705.14	1063.77	1141.41	610.146	5281.61	1979.52	17.3177	0.735406
Ndufaf3	226.992	-0.91892	8.82313e-09	291.605	359.079	136.713	120.571	139.863	24563.9	12025.9	473.763	508.165
Pacrg	91.356	-0.995671	9.41849e-09	138.725	156.248	39.6387	30.8127	264.458	27452.9	63836.2	498.503	37.5057
AK129341	646.317	-0.776538	1.08774e-08	735.146	970.485	421.465	458.171	882.544	31329	38737.4	1089.78	130.902
Acss2	1497.8	-0.553029	1.35289e-08	1795.87	1819.66	1202.11	1173.56	668.168	6672.41	5242.97	2816.6	516.99
Spag6	48.4733	-0.933624	1.47904e-08	69.8342	105.783	8.89849	9.37777	439.745	62555.1	43225.9	80.4037	0.735406
Phyhipl	345.604	-0.850759	1.51044e-08	422.78	528.914	233.788	196.933	80.0092	16962	74152.5	61.849	62.5095
13-qA5-703	64.5433	-0.959917	2.16321e-08	100.976	120.34	23.4597	13.3968	22.598	12822.4	1505.41	2.47396	0.735406
Kdm4d	72.9665	-0.963017	2.35203e-08	112.301	134.897	29.9313	14.7365	24.4303	16212.3	12922.3	43.2943	25.0038
BC051142	382.305	-0.831415	2.41246e-08	450.147	591.025	232.17	255.879	76.3447	77615.2	141664	298.112	55.8908
Pabpc6	76.4545	-0.968933	2.4856e-08	112.301	139.75	28.3134	25.4539	20.7657	98783.5	47749.1	42.0573	5.88324
Mtmr6	1934.17	-0.516275	2.52546e-08	2268.67	2340.81	1579.89	1547.33	4058.48	34242.9	33797.2	3080.08	5239.76
Fam227b	33.8914	-0.860434	3.02093e-08	53.7912	76.6683	2.42686	2.67936	1.83227	14330.8	15266.9	17.3177	0
Gtf2a1l	33.8914	-0.860434	3.02093e-08	53.7912	76.6683	2.42686	2.67936	3.05379	30257.1	47641.8	19.7917	0
Ints6	4272.25	-0.457319	3.03615e-08	4835.55	5135.81	3567.49	3550.16	4511.05	24380.7	35051.7	5860.81	1684.81
Ptpn20	244.054	-0.861964	3.08601e-08	321.804	357.138	147.23	150.044	32.9809	24442.9	7942.32	8.65886	0
Fam229b	113.932	-0.962054	3.24298e-08	149.105	207.684	53.391	45.5492	19.5442	23399.2	37484.6	113.802	52.9492
Dync2h1	1852.04	-0.543313	3.91641e-08	2313.97	2140.89	1410.01	1543.31	3186.32	26758.6	18398.8	7376.11	354.465
Lypd4	46.6624	-0.903819	4.12079e-08	67.0031	101.901	9.70745	8.03809	0	22607.7	37465.6	18.5547	0
Rbmxl2	822.025	-0.64117	4.44472e-08	971.073	1083.06	608.333	625.631	127.038	2596.14	3602.59	2.47396	0
Brca2	2547.02	-0.514878	5.28955e-08	3104.79	2959.98	1942.3	2181	2148.64	8617.25	5462.72	1504.17	374.321
1700029P11Rik	110.27	-0.950267	5.478e-08	125.513	231.946	46.1104	37.5111	48.2498	17613.3	8440.66	11.1328	0
Tekt1	47.9745	-0.896948	5.66195e-08	66.0594	106.753	9.70745	9.37777	406.154	48674.3	88183.9	108.854	0
Taf9	2353.04	-0.509173	5.69126e-08	2703.72	2889.13	1833.9	1985.41	4611.83	71493.5	71224.8	1157.81	7707.05
Ccdc104	1657.64	-0.641728	6.06366e-08	1829.84	2313.64	1152.76	1334.32	3500.25	138724	172464	2586.52	38393.3
15-qD1-4001	49.6053	-0.902698	8.46494e-08	93.4268	80.5502	9.70745	14.7365	3.66454	4006.16	887.671	21.0287	0
Cenpp	636.087	-0.6642	8.71844e-08	771.007	835.587	459.486	478.266	381.723	4422.26	4033.45	54.4271	205.178
Glt8d1	1437.52	-0.535629	8.95504e-08	1692.06	1762.4	1168.94	1126.67	1425.51	34215.7	30163.5	4533.53	3028.4
Phtf1	1769.08	-0.553201	9.15955e-08	1981.78	2295.2	1379.27	1420.06	1650.27	20315.7	17037	2685.48	4699.24
Acot7	709.641	-0.672184	1.07071e-07	821.967	977.278	504.787	534.533	977.822	35236.8	48154	355.013	3132.09
Gm4763	29.8584	-0.803337	1.1635e-07	49.0727	67.9339	2.42686	0	0	4068.35	460.274	2.47396	0
Gbf1	1593.31	-0.527449	1.1673e-07	1887.41	1932.24	1329.11	1224.47	3011.03	24713.1	22671.1	17124.7	2585.69
Dis3l	394.282	-0.79898	1.1698e-07	453.922	610.435	243.495	269.276	686.491	57928.2	33951.2	1140.5	1172.97
Fignl1	1560.4	-0.559729	1.26651e-07	1767.56	2018.61	1272.48	1182.94	870.329	11176.1	2796.25	206.576	160.318
Zmym6	1213.56	-0.55217	1.31376e-07	1434.43	1501.34	978.025	940.456	484.941	1931.28	3086.95	7141.08	1004.56
Ift80	1265.21	-0.591366	1.35312e-07	1422.16	1684.76	989.35	964.571	1283.81	20530.6	7246.71	1411.39	796.444
4933411G11Rik	37.7402	-0.839097	1.45821e-07	58.5097	82.4912	7.28058	2.67936	1.22151	5243.17	1642.1	3.71094	0
4732415M23Rik	293.506	-0.832917	1.53995e-07	345.396	465.833	169.88	192.914	42.1423	32765	58534.4	139.779	56.6262
Psd	90.6112	-0.921542	1.68656e-07	131.175	153.337	36.4029	41.5301	82.4522	703.311	2996.97	465.104	18.3851
Hyou1	3383.04	-0.475475	1.70263e-07	3799.36	4158.53	2885.54	2688.74	11408.3	35431.3	10771.4	22989.3	7768.82
Nphp1	2011.95	-0.603062	1.83064e-07	2258.29	2701.83	1388.97	1698.72	1887.24	103995	122040	538.086	1776
Mllt10	2097.7	-0.51246	1.91663e-07	2406.45	2597.02	1779.7	1607.62	2210.94	41821	5659.98	5420.44	1056.04
Rnf17	3038.48	-0.443434	2.1789e-07	3506.81	3557.8	2546.59	2542.72	1513.46	24104.8	33882	107.617	141.198
guttman:linc1293.3	146.196	-0.897026	2.44657e-07	186.854	247.474	64.7163	85.7396	25.6518	1872.48	1951.84	178.125	26.4746
Pfn4	121.943	-0.903386	2.5511e-07	162.317	207.684	65.5253	52.2476	12.2151	13067.8	16990.3	22.2656	30.1516
Ccna2	2629.91	0.460815	2.84063e-07	2193.17	2174.86	3169.48	2982.13	1247.17	232.929	411.824	106.38	592.001
Ccdc136	553.213	-0.664382	2.88027e-07	672.862	728.834	397.196	413.962	1793.79	159964	276370	6814.52	878.074
H2afx	788.125	-0.62155	2.88027e-07	918.225	1044.24	609.951	580.082	927.13	2884.48	1725.16	283.268	830.273
Pcbp3	234.905	-0.839999	2.88027e-07	294.436	361.991	123.77	159.422	633.355	24866.9	20329.9	3208.72	536.111
3-qA3-2052	26.1511	-0.752503	2.89357e-07	41.523	63.0815	0	0	0.610757	9626.99	2145.64	0	0
5-qF-14508	34.7742	-0.802465	3.01074e-07	49.0727	82.4912	4.85372	2.67936	0.610757	2671.9	410.093	1.23698	0
Asf1b	1555.4	-0.554315	3.21431e-07	1726.98	2041.9	1229.61	1223.13	284.613	3063.13	1472.53	49.4792	105.898
Dtl	1344.83	-0.520756	3.50587e-07	1572.21	1644.97	1078.34	1083.8	987.594	7747.72	3910.6	404.492	112.517
Cyct	393.294	-0.718276	3.53351e-07	491.671	531.826	275.044	274.635	94.0566	7505.75	3465.9	48.2422	0
Rsph1	922.884	-0.883548	3.53351e-07	1140.94	1932.24	331.671	286.692	713.975	273263	143766	696.419	343.434
Acer3	1102.2	-0.558242	4.22263e-07	1290.05	1387.79	900.366	830.603	1835.94	881.965	1027.83	26282.1	3064.43
Cetn4	95.158	-0.891057	5.17248e-07	125.513	171.776	44.4925	38.8508	159.408	35518.3	47193.6	209.05	869.249
Adam5	61.216	-0.869259	5.64684e-07	82.1024	123.252	19.4149	20.0952	133.756	242417	329682	776.823	77.953
Ttll13	125.605	-0.880043	5.75197e-07	161.374	214.477	58.2447	68.3238	45.196	29428.2	70224.6	1282.75	72.0697
10-qC1-12816	104.16	-0.883412	5.95811e-07	152.88	164.012	54.1999	45.5492	34.2024	5283.88	1169.72	23.5026	38.2411
Slc8a2	76.862	-0.88378	6.21034e-07	108.526	136.838	29.9313	32.1524	86.7275	4844.02	4419.32	9.89584	6.61865
Clec2d	181.671	0.827756	6.70342e-07	106.639	110.635	262.91	246.501	669.39	120.988	22.4946	1126.89	4130.77
Strbp	4375.62	-0.501271	7.66556e-07	4773.26	5622.99	3333.7	3772.54	3715.85	27720.8	25382.5	16407.3	1440.66
Gm960	203.608	-0.813924	7.73818e-07	266.125	298.909	118.107	131.289	20.155	137.948	212.833	2566.73	17.6497
Hectd2	1295.77	-0.513064	7.75323e-07	1526.92	1565.39	1021.71	1069.07	1500.02	5237.52	5082.04	27.2136	336.08
4930447C04Rik	3014.35	-0.496104	8.17789e-07	3638.93	3506.36	2240.8	2671.32	704.203	4104.53	3725.45	1.23698	385.353
Dnaic1	79.5507	-0.865855	1.08939e-06	100.033	155.278	30.7402	32.1524	53.7466	13832.2	14860.3	16.0807	5.14784
Shcbp1l	292.952	-0.740392	1.18148e-06	400.131	376.548	198.194	196.933	135.588	80511	34965.2	69.2709	1.47081
Pih1d2	109.932	-0.864101	1.18763e-06	145.331	186.333	55.8178	52.2476	270.565	10097.4	8404.32	220.182	113.988
Tdrd12	439.458	-0.676119	1.19108e-06	585.097	541.53	328.435	302.768	290.11	5991.71	3545.49	19.7917	2.20622
10-qB5.1-5404	26.2915	-0.731946	1.21759e-06	57.566	44.6423	1.61791	1.33968	1.22151	11468.9	725.018	6.1849	11.0311
Fbp1	30.942	-0.759907	1.21773e-06	57.566	59.1996	5.66268	1.33968	13.4367	42505.1	42490.5	32.1615	0.735406
Smpd3	106.297	-0.862211	1.21773e-06	152.88	166.923	55.8178	49.5682	119.098	796.03	5952.41	29.6875	52.2138
4930579G24Rik	330.705	-0.723158	1.41981e-06	416.174	454.187	239.45	213.009	263.847	7110	801.153	56.9011	421.387
Fmr1	4644.05	-0.391999	1.54495e-06	5349.87	5264.88	4002.7	3958.76	8371.04	862.743	2758.18	6734.12	6709.84
Ldhal6b	119.092	-0.719059	1.837e-06	165.148	289.204	7.28058	14.7365	8.5506	68854.3	63386.3	137.305	16.1789
Zpbp	164.475	-0.825507	1.8528e-06	203.84	265.913	93.0297	95.1174	34.8132	15842.6	24295.9	121.224	76.4822
Adgb	40.1386	-0.787471	1.88048e-06	62.2846	80.5502	5.66268	12.0571	385.388	4646.15	33584.4	69.2709	21.3268
Ccdc92	534.208	-0.676079	2.21055e-06	628.508	746.303	423.083	338.939	395.16	59504.4	70579.3	275.846	192.676
Catsperg2	37.0306	-0.765896	2.31533e-06	50.9601	83.4617	5.66268	8.03809	9.16136	22587.4	13008.8	17.3177	0
Ccdc36	530.285	-0.62172	2.34732e-06	651.157	675.457	393.96	400.565	273.008	3754.01	1934.53	27.2136	5.88324
Mdh1b	30.4876	-0.73312	2.36783e-06	43.4104	71.8159	4.04477	2.67936	59.8542	27330.7	21627.7	24.7396	19.856
Ptpdc1	480.628	-0.651311	2.43933e-06	584.154	633.727	330.862	373.771	692.599	39815.1	40775.7	877.019	900.872
Mroh8	39.6572	-0.775571	2.67126e-06	59.4534	82.4912	11.3254	5.35873	21.3765	23793.8	21428.7	63.086	1.47081
Kif9	196.095	-0.788243	2.91829e-06	256.688	285.323	108.4	133.968	231.477	44521.2	54158.3	938.867	216.945
Nek4	537.77	-0.635583	2.91829e-06	627.564	726.893	386.68	409.943	302.325	7063.64	6277.72	1166.47	255.921
Atxn2l	2524.08	-0.431701	2.96353e-06	2934.92	2916.31	2050.7	2194.4	11242.2	59337	70759.3	17628.2	3607.16
Fam213a	2018.78	0.477508	3.26856e-06	1605.24	1709.99	2527.98	2231.91	2527.92	12196	4362.22	891.862	8181.39
Fank1	65.2385	-0.825909	3.26856e-06	85.8772	126.163	23.4597	25.4539	200.939	49854.8	68047.8	2817.84	55.1554
Nell2	199.636	-0.779062	3.26856e-06	259.519	291.145	132.668	115.213	833.073	5756.52	1512.33	2.47396	177.968
1700003E16Rik	48.2438	-0.801051	3.29393e-06	79.2713	84.4322	10.5164	18.7555	11.6044	17063.8	35629.7	192.969	2.20622
Dzip3	1817.32	-0.460504	3.32961e-06	2052.56	2208.82	1520.83	1487.05	2686.11	2399.4	2761.64	3265.63	917.051
1-qC1.3-637	85.1083	-0.837298	3.35136e-06	117.963	145.573	42.0656	34.8317	14.6582	4296.75	1237.2	91.5365	27.21
Cpeb2	1091.22	-0.507928	3.58424e-06	1295.71	1311.12	901.983	856.056	2973.17	20422	63490.1	26319.2	1509.05
Trim37	3467.59	-0.413246	3.60803e-06	3840.88	4149.79	2963.2	2916.49	6621.83	176105	156893	3472.2	1495.81
Dpep3	2203.01	-0.455924	4.16324e-06	2431.93	2725.12	1825	1830	184.449	41609.5	35709.3	48.2422	41.1827
Kansl1l	824.506	-0.542275	4.26966e-06	982.397	1015.13	664.151	636.349	2680	9230.1	7390.33	1408.92	633.184
Ccdc62	294.659	-0.740746	4.50398e-06	420.893	366.843	165.836	225.066	202.771	37948.2	38770.3	21570.4	359.613
Ccdc41	3028.59	-0.442245	4.65149e-06	3466.23	3583.03	2367	2698.12	8092.53	36191.1	102252	6171.29	5743.52
Dmrta1	2999.76	0.416136	4.82509e-06	2598.96	2481.53	3566.68	3351.88	302.936	49.7519	44.9892	2.47396	24.2684
Ccdc173	169.166	-0.802258	4.90327e-06	217.996	262.031	80.0864	116.552	357.293	28072.5	70029.1	973.503	661.13
Arid2	2224.43	-0.423753	5.04396e-06	2575.37	2571.78	1893.76	1856.8	5397.26	36273.6	21785.1	6859.05	1984.86
Rpl39l	1204.92	-0.49709	5.13184e-06	1409.9	1458.64	1016.05	935.098	1162.27	41778	49970.8	174.414	14.7081
Syce2	2009.79	-0.495987	5.43834e-06	2285.65	2488.32	1490.09	1775.08	1063.94	5149.32	25764.9	5608.47	668.484
Prps1l1	22.3228	-0.65149	5.72306e-06	33.9734	55.3176	0	0	0	29457.6	28147.6	27.2136	0
Emc7	2240.72	-0.474639	5.89609e-06	2452.69	2834.79	1912.37	1763.02	1936.1	4124.88	3578.37	1598.18	7121.67
Ccdc73	375.774	-0.673832	6.0532e-06	444.485	525.032	271	262.578	100.164	6255.17	3640.66	7.42188	0
Odf4	21.0293	-0.645996	6.88765e-06	45.2979	38.8194	0	0	1.22151	12613.2	14881	24.7396	0
Xist	115.839	-0.804537	7.25841e-06	170.811	165.953	62.2894	64.3047	9.16136	12.438	148.81	81.6407	0
Ttc16	60.325	-0.798294	7.34565e-06	83.0461	112.576	20.2238	25.4539	96.4996	11409	16201.3	101.432	15.4435
17-qE1.1-7037	26.2884	-0.673067	8.27968e-06	36.8045	64.052	1.61791	2.67936	9.16136	1912.06	205.912	374.805	0.735406
7-qD1-9417	22.3976	-0.656029	8.34071e-06	46.2416	41.7308	1.61791	0	0	3374.08	224.946	1.23698	0
Dnajc5g	104.334	-0.805027	8.59658e-06	151.937	156.248	58.2447	50.9079	16.4904	9409.89	10847.6	7.42188	0
A830018L16Rik	27.8769	-0.669613	9.06583e-06	36.8045	69.8749	0.808954	4.01904	43.9745	149.256	102.091	42.0573	0
Pigf	504.013	-0.626241	9.6728e-06	610.577	662.841	407.713	334.92	316.983	3276.84	11624.5	1223.37	791.296
Aasdhppt	1371.82	-0.474894	1.011e-05	1546.73	1692.53	1145.48	1102.56	1171.43	3781.14	2244.27	1185.03	2190.04
Ift81	908.192	-0.515781	1.07692e-05	1080.54	1096.65	697.318	758.26	1930.6	23774.6	50450.1	1347.07	1510.52
Tcea2	333.51	-0.710488	1.07998e-05	385.032	500.77	249.967	198.273	149.636	35351	32987.4	1050.2	252.98
Cep70	1007.44	-0.535303	1.14863e-05	1133.39	1301.42	748.282	846.679	1010.8	12060.3	6917.95	3705.99	539.052
9230110C19Rik	492.592	-0.604128	1.22027e-05	632.283	598.789	388.298	350.997	298.05	5911.43	3898.48	28.4505	153.7
Prss50	1731.6	-0.444059	1.22161e-05	1941.2	2098.19	1429.42	1457.57	18.3227	556.317	1273.54	1.23698	6.61865
4933427G17Rik	72.8613	-0.795882	1.23528e-05	112.301	113.547	34.785	30.8127	3.05379	2494.38	11413.4	267.188	25.7392
Alms1	1295.95	-0.476068	1.23528e-05	1598.64	1461.55	1045.17	1078.44	1691.19	8005.53	19587.6	936.394	280.925
Lrrc27	193.106	-0.74802	1.27357e-05	241.589	286.293	113.254	131.289	175.287	38745.4	71127.9	794.141	1749.53
Wdr62	826.789	-0.519896	1.33297e-05	987.116	999.599	639.882	680.558	686.491	61685.5	58318.1	650.651	212.532
Stk25	3490.79	-0.384506	1.36817e-05	3884.29	4081.86	2959.96	3037.06	4880.56	32896.2	14351.5	11249.1	7071.66
2-qG3-1029	21.7099	-0.637924	1.37348e-05	40.5793	44.6423	1.61791	0	0	12337.3	2820.47	12.3698	0
Rdh11	315.952	-0.712378	1.37496e-05	364.27	478.449	236.215	184.876	4104.9	30519.4	26464	1412.63	1428.89
Dnaaf1	179.09	-0.760958	1.3759e-05	214.221	283.382	103.546	115.213	70.2371	142187	166661	811.459	29.4162
Tmprss12	32.6209	-0.700148	1.38799e-05	52.8475	65.0225	3.23582	9.37777	0.610757	3002.07	1245.85	0	0
Nup205	3369.5	-0.392677	1.46756e-05	3738.02	3978.02	2948.64	2813.33	7345.58	93621.7	61553.8	8360.74	3543.18
Tmem255a	3008.46	0.400254	1.48926e-05	2560.27	2569.84	3593.37	3310.35	660.839	204.661	223.215	11.1328	240.478
Cox7b	1071.7	0.521466	1.4903e-05	899.351	805.502	1198.06	1383.89	815.361	226.145	48.4499	854.753	2774.69
Hspa4l	2875.74	-0.417316	1.52392e-05	3148.2	3497.63	2485.92	2371.24	3044.62	112515	208847	3707.23	1323.73
Elavl3	209.122	-0.749235	1.55229e-05	238.757	336.758	127.006	133.968	34.8132	167.347	372.026	1.23698	0.735406
Ap4b1	755.282	-0.539424	1.56698e-05	864.434	967.573	592.963	596.158	979.655	7868.71	7886.94	5333.86	2770.27
Styxl1	62.8666	-0.7785	1.68106e-05	89.652	109.665	26.6955	25.4539	49.4713	5332.5	9657.1	96.4844	31.6224
uc009otz.1	39.0441	-0.719728	1.74689e-05	60.3971	76.6683	13.7522	5.35873	0.610757	2342.86	4490.26	22.2656	0
Pcbp2	4543.56	-0.361881	1.78926e-05	5146.03	5143.57	4015.65	3869	16644.4	55034.6	42957.7	6606.71	21285.6
4933425L06Rik	80.8123	-0.784559	1.79025e-05	110.414	137.809	42.8746	32.1524	44.5853	2786.11	851.333	0	0
Fam228b	127.003	-0.772528	1.90664e-05	161.374	202.831	72.8058	71.0031	24.4303	699.919	5177.21	230.078	61.0387
Sephs2	583.131	-0.56634	2.02228e-05	693.623	740.48	468.384	430.038	1060.89	27273.1	24837.5	787.956	2116.5
1700025E21Rik	42.7789	-0.735308	2.0444e-05	68.8905	76.6683	16.1791	9.37777	8.5506	24548	32890.5	19.7917	8.08946
Pcm1	4799.52	-0.358097	2.12476e-05	5460.28	5391.04	4089.26	4257.51	20079.3	70597.9	47674.7	28069.5	11110.5
Fmr1nb	1017.44	-0.572133	2.1582e-05	1075.82	1429.52	745.855	818.545	105.05	372.008	1694.01	0	30.887
Eaf2	175.706	-0.731983	2.25833e-05	238.757	240.68	114.871	108.514	131.924	366.355	747.512	456.445	199.295
Rplp0	6266.07	-0.341757	2.35688e-05	7106.1	6981.67	5471.76	5504.75	16665.1	25045.5	25515.8	6604.23	38419.1
Ppp4r4	539.535	-0.609676	2.55148e-05	670.031	681.28	348.659	458.171	235.752	9494.69	15251.3	317.904	256.657
Larp7	1811.98	-0.46568	2.5669e-05	1999.71	2264.14	1397.87	1586.18	4555.03	75444.2	87965.9	825.065	2996.78
Zfand4	496.681	-0.585393	2.57841e-05	582.266	650.225	377.781	376.45	277.284	25292	55300.3	166.992	200.03
10-qA3-143	87.9875	-0.773444	2.61336e-05	114.188	150.425	40.4477	46.8889	19.5442	2104.28	399.711	153.385	64.7157
18-qE1-36451	27.2193	-0.662523	2.65768e-05	48.129	52.4062	5.66268	2.67936	0	12467.4	1169.72	7.42188	6.61865
Sgpl1	3462.4	0.384854	3.00775e-05	3072.7	2870.69	4074.7	3831.49	6525.94	468.12	519.106	7369.92	7301.11
18-qE1-1295	18.8993	-0.590533	3.07288e-05	37.7482	37.8489	0	0	0.610757	16466.7	1195.67	6.1849	0
Dak	434.578	-0.59219	3.14141e-05	533.194	549.294	323.582	332.241	289.499	24302.7	8177.64	1871.55	881.751
1700011I03Rik	20.422	-0.587487	3.19778e-05	28.3112	53.3767	0	0	36.6454	15403.9	24109	23.5026	0
Spryd7	902.838	-0.498616	3.22559e-05	1096.59	1061.71	764.461	688.596	710.921	3543.69	3168.27	505.925	1128.85
Ankrd42	376.355	-0.652393	3.38146e-05	446.373	521.15	233.788	304.108	1114.02	50855.5	100819	930.209	1220.04
4-qB3-277	18.6634	-0.583863	3.66658e-05	36.8045	37.8489	0	0	0.610757	2237.7	531.218	6.1849	0
Topaz1	622.614	-0.545296	3.7346e-05	722.878	793.857	470.002	503.72	395.771	6282.31	2533.24	7.42188	14.7081
Phc1	1114.16	-0.4666	3.77698e-05	1261.73	1365.47	923.825	905.625	2973.17	16921.3	28147.6	1980.4	730.258
Lig3	2242.97	-0.399729	4.26374e-05	2503.65	2651.36	1956.05	1860.82	2767.95	25411.9	29094.1	6361.79	1263.43
11-qE1-252	32.69	-0.668419	4.29052e-05	48.129	68.9044	9.70745	4.01904	4.88606	2790.63	1643.83	0	14.7081
Bbs7	530.356	-0.581367	4.43563e-05	637.001	676.428	363.22	444.774	384.166	8595.77	11572.6	319.141	792.032
Ift88	1020.71	-0.47927	4.54187e-05	1166.42	1250.95	796.011	869.453	1131.73	11038.1	13285.6	4039.98	978.825
7-qD1-19431	25.6821	-0.629659	4.59327e-05	36.8045	59.1996	4.04477	2.67936	0	16564	1671.52	4.94792	0
Ddx25	1044.18	-0.492532	4.82825e-05	1155.1	1332.48	812.999	876.152	509.372	70394.4	83679.8	69.2709	41.9181
Bbs1	241.695	-0.675016	4.93253e-05	293.492	341.611	164.218	167.46	438.524	3236.13	1399.85	604.883	68.3927
Clptm1l	1970.27	-0.401526	5.25362e-05	2219.6	2312.67	1711.75	1637.09	3588.2	14060.6	11050	7350.13	7737.94
uc009mlj.1	59.0336	-0.735017	5.31372e-05	80.215	106.753	21.0328	28.1333	10.9936	3083.49	1837.63	286.979	3.67703
Armc3	20.8585	-0.597794	5.43196e-05	36.8045	43.6718	1.61791	1.33968	101.386	19673.5	30263.9	22.2656	4.41243
Tex30	5053.22	-0.341926	5.48198e-05	5664.12	5705.48	4514.77	4328.51	1529.95	9003.96	7670.65	213.997	514.784
Ttc21b	1639.35	-0.427164	5.58103e-05	1834.56	1974.94	1422.95	1324.94	1018.13	26942.9	16926.3	1812.18	1071.49
Zswim4	788.808	-0.501253	5.65257e-05	981.454	905.462	617.232	651.085	7907.47	1666.69	2720.11	1403.97	1382.56
Fam178b	386.836	-0.601833	5.70304e-05	463.359	509.504	298.504	275.974	202.771	31577.7	32338.6	51.9531	8.82487
Zfp318	2470.16	-0.386612	5.8819e-05	2820.74	2825.08	2037.75	2197.08	7663.17	47293.7	23484.3	5875.65	2340.8
Sdf2l1	154.57	-0.71656	6.01316e-05	208.559	216.418	103.546	89.7587	81.8415	5585.78	1325.45	304.297	822.183
15-qE1-8387	37.6336	-0.68683	6.09061e-05	54.7349	73.7568	11.3254	10.7175	19.5442	3029.21	368.565	4.94792	24.2684
Spata6	925.58	-0.480581	6.09061e-05	1072.99	1125.76	785.494	718.069	2315.99	44119.7	184054	1928.45	3028.4
Eid3	32.6311	-0.644086	6.12919e-05	43.4104	74.7273	9.70745	2.67936	178.341	54093.9	59363.2	577.669	65.4511
Sec61a2	1408.98	-0.442194	6.40319e-05	1593.92	1701.26	1228.8	1111.94	1426.73	3291.54	4521.41	2854.95	2023.1
Efcab5	116.257	-0.734186	6.58328e-05	157.599	172.746	70.379	64.3047	107.493	85026	65038.7	458.919	20.5914
2610301G19Rik	1073.61	-0.4577	6.6596e-05	1214.55	1310.15	888.231	881.51	3310.92	15282.9	5914.34	7027.28	2420.22
7-qD1-654	18.6029	-0.569369	6.72243e-05	39.6356	33.967	0.808954	0	0	4580.57	394.52	0	0
Pmaip1	236.132	-0.664611	7.7391e-05	286.886	331.906	156.937	168.8	5178.61	561.97	294.16	372.331	2144.44
Pmel	114.125	-0.729504	7.80225e-05	158.543	165.953	70.379	61.6253	21.3765	525.787	828.839	64.3229	13.9727
Leng8	2330.76	-0.396871	7.86099e-05	2702.77	2645.54	1880.82	2093.92	6891.78	23916	15744.5	52085.5	2613.63
Gbas	2635.94	0.368564	8.22974e-05	2325.29	2229.2	3004.45	2984.81	1818.84	585.715	237.058	2570.44	2253.28
Rad9b	424.562	-0.570594	8.477e-05	538.856	512.416	322.773	324.203	144.139	1925.62	984.57	1814.65	55.8908
Alx1	20.2472	-0.575576	8.69094e-05	35.8608	42.7013	2.42686	0	27.4841	7177.84	5312.18	8.65886	4.41243
Wfdc15a	217.045	-0.706597	8.75051e-05	244.42	348.404	113.254	162.101	66.5725	10818.8	9942.6	23.5026	0
Tmem67	529.068	-0.571148	8.86984e-05	594.534	718.159	427.128	376.45	762.836	5932.91	3817.16	1810.94	755.997
Znrd1as	257.695	-0.676553	9.35696e-05	313.31	368.784	142.376	206.311	87.949	10994	18438.6	285.742	441.979
Ezr	961.011	0.47492	9.43762e-05	826.686	738.539	1098.56	1180.26	52152	2559.96	626.387	61659.7	9836.78
Top2a	7691.02	-0.356063	9.49685e-05	8174.38	9224.46	6788.74	6576.5	11509.7	40214.2	28533.5	2480.14	3266.67
1700012B09Rik	19.4245	-0.552639	9.86394e-05	26.4238	50.4652	0.808954	0	203.993	15979.4	33020.3	32.1615	3.67703
1700125H20Rik	48.2354	-0.703303	9.92581e-05	76.4401	78.6093	17.797	20.0952	21.3765	3406.87	7765.82	9.89584	12.5019
4930528A17Rik	44.7269	-0.688314	0.000101503	61.3408	86.3731	17.797	13.3968	8.5506	1771.85	567.555	6.1849	168.408
4930503L19Rik	379.569	-0.580949	0.00010194	468.078	478.449	290.414	281.333	646.181	9874.62	15554.1	87.8255	428.741
1700008K24Rik	17.7531	-0.542073	0.000104563	28.3112	42.7013	0	0	0	192.223	143.619	0	0
Mbtd1	2976.47	-0.359163	0.000104563	3300.14	3442.31	2619.39	2544.06	5561.56	12911.7	6985.43	6219.53	1823.07
Stard6	34.2001	-0.649383	0.000105598	45.2979	73.7568	9.70745	8.03809	4.88606	2396.01	3841.38	207.813	13.2373
Psmc3ip	560.258	-0.60106	0.000109416	653.044	756.008	342.996	488.984	611.979	27906.3	30584	129.883	705.989
Crem	466.686	-0.570489	0.000112371	567.167	592.966	389.107	317.505	1782.19	16582.1	38147.3	49306	1132.52
1700029J07Rik	195.155	-0.670001	0.00011411	250.082	266.883	127.006	136.648	177.73	2939.88	20951.1	3912.57	141.933
Wdr93	84.471	-0.723683	0.00011411	114.188	136.838	49.3462	37.5111	40.31	9626.99	6973.32	331.511	3.67703
Txnip	6813.43	0.331033	0.000117798	6140.69	5841.35	7856.56	7415.14	10506.2	4287.71	991.492	48420.3	12715.9
Dnahc7b	238.054	-0.642015	0.00012541	302.929	315.408	173.116	160.762	415.926	13676.1	6097.76	23.5026	110.311
Pcgf6	729.933	-0.503444	0.000130059	812.53	940.4	580.02	586.78	792.152	9686.92	2590.34	2492.51	726.581
Ccdc117	1441.87	-0.424237	0.000135976	1634.5	1717.76	1272.48	1142.75	2806.43	14754.8	8056.52	2024.94	1228.13
Rabgap1l	1278.41	-0.436371	0.000138177	1427.83	1558.6	1109.08	1018.16	1485.97	9018.66	4471.23	8123.24	2252.55
Dnajc27	508.299	-0.540812	0.000156462	579.435	663.812	390.725	399.225	771.997	20391.5	23076	220.182	268.423
Stxbp3a	1122.16	0.428875	0.000156462	930.494	947.193	1331.54	1279.4	3827.62	798.292	399.711	3714.65	7713.67
Dnajb11	3159.76	-0.385428	0.000159805	3476.61	3748.98	2534.45	2878.98	8324.62	25772.6	16185.7	8152.93	24455.2
Bcap29	1781.13	-0.422252	0.00016341	1905.34	2230.17	1504.65	1484.37	1578.2	65465.6	59998.2	2122.66	6498.78
Cand1	3160.89	-0.355109	0.00016341	3513.42	3640.29	2838.62	2651.23	14216	46108.7	58755.8	13862.8	10281
4930429F24Rik	26.5969	-0.604783	0.000165542	40.5793	55.3176	6.47163	4.01904	1.22151	1040.27	1167.99	14.8438	0
Ergic3	2320.85	-0.386899	0.000169212	2503.65	2810.52	1985.17	1984.07	3765.93	13277	15789.5	4905.86	9054.31
Gm884	267.879	-0.621343	0.000170778	323.691	362.961	185.25	199.613	115.433	11760.7	21125.9	2.47396	0
1600016N20Rik	131.721	-0.694833	0.000172634	185.91	177.599	73.6148	89.7587	70.2371	3324.33	16761.9	3031.84	23.533
Fam161b	197.921	-0.659156	0.00017675	244.42	278.529	125.388	143.346	145.971	5494.19	2159.48	528.19	69.8635
Smc4	7675.71	-0.397143	0.0001772	7881.83	9764.05	6515.31	6541.66	11214.7	157900	81428.6	7293.23	9586.75
Slit2	275.035	-0.617837	0.000185236	379.37	325.112	197.385	198.273	2881.55	126.641	136.698	60.612	3485.82
Agbl3	266.586	-0.620708	0.000187445	350.115	335.788	206.283	174.159	121.541	4713.99	14137	969.792	252.244
uc007uzm.1	24.5655	-0.570287	0.000191652	32.086	59.1996	1.61791	5.35873	12.2151	10123.4	14856.8	288.216	48.5368
Pdcl3	1236.2	0.414834	0.00019981	1027.7	1055.89	1462.59	1398.63	6587.02	321.126	308.003	2450.46	21984.2
Radil	564.945	-0.509798	0.000202349	656.819	706.513	453.014	443.435	293.163	3225.96	2183.7	0	39.7119
Tmem129	935.628	-0.450761	0.000202349	1061.67	1138.38	793.584	748.882	389.663	2833.6	754.434	655.599	1160.47
Zfy1	110.944	-0.69708	0.000202349	161.374	150.425	66.3342	65.6444	19.5442	109.68	1008.8	1.23698	0
Usp32	3810.35	-0.330968	0.000204519	4340.1	4205.11	3360.39	3335.81	7313.21	34342.4	28592.3	11549.7	3749.1
Aspa	72.4979	-0.701559	0.000204806	105.695	110.635	38.8298	34.8317	12.8259	593.63	243.98	2.47396	11.7665
Pkd2l2	39.4143	-0.656101	0.000208049	70.7779	59.1996	12.9433	14.7365	2.44303	8015.71	7483.77	55.6641	5.88324
Rims2	179.399	-0.6698	0.000212028	221.771	259.119	102.737	133.968	611.979	3861.42	1934.53	2102.87	219.886
Rbm27	2039.54	-0.3752	0.000216144	2244.13	2405.83	1742.49	1765.7	5425.97	20203.8	23536.2	4539.72	3041.64
Acsl4	2568.64	0.370197	0.000220244	2230.92	2201.06	3070.79	2771.8	26501.4	505.434	299.351	124241	19688.3
Sun1	1883.05	-0.37636	0.000226614	2091.25	2203.97	1606.58	1630.39	6310.34	10081.5	12834	7456.51	2714.38
Shank1	46.1324	-0.67043	0.000228048	70.7779	76.6683	16.988	20.0952	36.0347	817.514	287.238	14.8438	10.2957
Nxt1	482.631	-0.524925	0.000232571	570.942	602.671	377.781	379.13	767.111	16132	9908	298.112	433.889
Rps20	3610.62	-0.34339	0.000232571	4226.86	3908.14	3156.54	3150.93	3528.34	4976.32	6891.99	1208.53	5155.93
Cdc14a	335.874	0.576522	0.000233616	262.35	241.651	429.554	409.943	1418.18	5057.73	52808.6	1960.61	175.762
Kctd7	165.579	-0.662325	0.000236618	215.165	228.064	113.254	105.835	221.094	5330.24	972.458	399.544	533.169
Tsnaxip1	29.8869	-0.615219	0.000251106	49.0727	54.3471	8.08954	8.03809	147.192	68596.5	103947	209.05	16.1789
Ap1m1	1423.28	-0.406033	0.000270659	1564.66	1721.64	1215.86	1190.98	1403.52	22978.6	18506.1	1125.65	1178.12
Poln	279.375	-0.622109	0.000275085	314.254	408.574	211.137	183.536	54.9682	1899.62	1790.91	35.8724	65.4511
Topbp1	4067.68	-0.335353	0.000279628	4424.09	4712.67	3479.31	3654.65	4220.33	7290.91	3206.34	4606.51	2581.27
Wdr63	22.9301	-0.562757	0.000279755	33.0297	51.4357	3.23582	4.01904	304.157	22754.7	20746.9	11.1328	11.7665
Itgb3bp	338.222	-0.566883	0.000285226	417.118	425.072	254.82	255.879	59.2435	5714.68	6656.66	166.992	190.47
Canx	9938.99	-0.31912	0.000297902	10544	11653.6	8716.48	8841.9	24913.4	24094.6	19897.3	63084.7	57658.7
Fbxo43	54.5634	-0.672152	0.000298173	84.9335	84.4322	19.4149	29.473	36.6454	10032.9	1237.2	56.9011	2.94162
Ddx19b	1083.6	-0.417889	0.000299079	1236.25	1277.16	901.983	919.021	4171.47	22862.1	12572.7	5850.91	1514.2
Glb1l	422.423	-0.539659	0.00031097	501.108	536.678	339.761	312.146	544.185	13999.5	14256.4	2318.1	685.398
Spag16	40.9886	-0.644826	0.000315735	62.2846	71.8159	17.797	12.0571	257.74	30638.1	29147.8	58.138	2.20622
Ccdc151	44.811	-0.652684	0.000320095	63.2283	80.5502	15.3701	20.0952	165.515	13125.5	10316.4	28.4505	23.533
Ugt8a	1129.05	-0.469644	0.000320095	1307.98	1375.18	1026.56	806.488	53.1359	130.033	288.969	0	0
4930455F23Rik	788.85	-0.524706	0.000343124	832.348	1086.94	566.268	669.841	1221.51	86132.9	114970	1457.16	3005.6
Agbl5	600.003	-0.493442	0.000346856	679.468	759.89	479.71	480.946	1274.65	104384	123876	4607.75	385.353
Ift172	517.26	-0.506547	0.00035276	601.14	647.313	405.286	415.301	1675.31	57157	56042.6	8735.55	830.273
Nucb1	1218.41	-0.411321	0.000363898	1346.67	1473.2	1020.9	1032.89	8875.52	4821.41	3024.66	35235.4	23818.3
Spata16	16.257	-0.500885	0.000365794	28.3112	35.9079	0.808954	0	1.22151	87155.1	85155.8	107.617	2.20622
Stk30	172.478	-0.652812	0.000368183	205.728	255.237	104.355	124.59	445.853	18192.2	26005.5	160.807	182.381
Stk17b	1586.25	-0.400488	0.000375125	1713.77	1942.91	1364.71	1323.61	1106.69	3009.99	3711.61	2117.71	1179.59
Dync2li1	455.232	-0.559533	0.000387359	491.671	638.579	327.626	363.054	477.001	5039.64	6106.41	199.154	1745.12
Pdia6	6682.84	-0.309831	0.000403666	7182.54	7696.91	5985.45	5866.47	17119.5	29705.3	26005.5	22735.7	35177.4
Tdrd6	30.916	-0.603953	0.000403713	48.129	57.2586	8.89849	9.37777	20.7657	126100	106841	116.276	18.3851
Map10	248.299	-0.610414	0.000417774	295.38	342.581	160.982	194.254	256.518	4570.39	5390.05	517.057	247.832
Oscp1	196.995	-0.623967	0.000421044	259.519	254.267	141.567	132.628	265.069	28576.8	45989.3	175.651	311.077
Stip1	3167.88	-0.397984	0.000444205	3269	4027.51	2731.84	2643.19	12822.2	13027.1	18847	6191.08	10444.2
Ccdc65	43.4759	-0.636928	0.000449866	58.5097	81.5207	17.797	16.0762	172.844	51341.7	86197.5	107.617	150.758
Nme5	40.1232	-0.609503	0.000479914	67.9468	66.9634	20.2238	5.35873	431.805	12435.7	30080.4	55.6641	63.9803
6-qD1-2831	97.3536	-0.668887	0.00050865	131.175	145.573	63.0984	49.5682	8.5506	6209.94	1173.18	2.47396	0.735406
Taf1b	1003.53	-0.439003	0.000510742	1089.04	1263.57	846.975	814.526	913.082	9388.41	3943.47	1063.8	1000.89
Ddx39	1872.49	-0.364468	0.000516764	2055.39	2200.09	1596.07	1638.43	6543.65	13243	4087.09	2090.5	3582.16
Wdr17	65.6829	-0.664286	0.000520712	92.4831	103.842	35.594	30.8127	15.2689	2756.71	1046.86	2.47396	2.94162
Mybl1	712.033	-0.4586	0.000531454	806.868	877.318	594.581	569.365	464.786	8951.95	5414.27	933.92	222.092
4930430A15Rik	15.1044	-0.474894	0.000538289	25.48	34.9375	0	0	0	10997.4	14733.9	8.65886	0
Wdr47	993.599	-0.413635	0.000539432	1140	1164.58	848.593	821.225	2009.39	2631.2	4896.9	5180.47	1416.39
Fam228a	45.4153	-0.630818	0.000556295	59.4534	85.4027	15.3701	21.4349	1.22151	6571.77	2297.91	40.8203	0
4933433G15Rik	53.842	-0.648755	0.000560128	78.3275	87.3436	20.2238	29.473	24.4303	4223.26	2085.07	121.224	21.3268
Nptn	4126.54	0.326274	0.000562555	3562.49	3701.43	4813.28	4428.99	6199.19	884.227	3349.96	3560.03	23046.9
1700123I01Rik	225.116	-0.615259	0.000590167	256.688	328.024	145.612	170.14	12.2151	1685.91	513.915	1.23698	0
Mrgbp	488.032	-0.534628	0.000596789	557.73	638.579	332.48	423.339	606.482	6860.11	2092	608.594	629.507
Atp6v0b	1241.85	-0.425845	0.000605964	1342.89	1554.72	1090.47	979.307	1142.73	694.265	963.806	2544.47	2048.84
Tcp1	8128.53	-0.337119	0.000608138	8606.59	9685.44	7463.41	6758.69	29763.4	367479	384225	12213.9	44247.1
4933406J08Rik	262.599	-0.595372	0.000613609	294.436	377.519	186.868	191.574	22.598	801.684	235.328	0	0
B9d1	198.702	-0.612144	0.000635094	245.363	271.736	146.421	131.289	111.158	3413.66	5052.63	115.039	101.486
9-qA5.3-24188	18.5554	-0.499615	0.000657634	29.2549	41.7308	3.23582	0	0	25181.2	1123	11.1328	1.47081
Hyls1	548.323	-0.508486	0.000667539	595.478	734.657	442.498	420.66	302.936	12095.4	12351.3	322.852	211.797
March10	25.3718	-0.533712	0.000667539	29.2549	63.0815	6.47163	2.67936	18.9335	76107.9	149125	687.761	0
Cdc42ep3	291.404	-0.571487	0.00069576	333.128	400.81	215.991	215.689	3061.73	32792.1	6352.12	351.302	3297.56
Gapvd1	1365.02	-0.395166	0.00074994	1500.49	1644.97	1209.39	1105.24	9913.2	5946.48	6936.98	17020.8	3756.45
Zfp672	565.548	-0.47642	0.000750336	650.213	700.69	469.193	442.095	997.367	5416.17	3144.05	2209.25	661.13
Abca16	86.4717	-0.654562	0.000762243	117.963	130.045	55.0089	42.8698	6.71833	12286.5	11332.1	7.42188	0
2410089E03Rik	1396.14	-0.390004	0.000764223	1675.08	1530.45	1143.86	1235.19	3094.71	9945.85	10162.4	1789.91	737.612
Upf1	1187.17	-0.395437	0.000771132	1318.36	1416.91	1031.42	981.987	7923.35	19493.7	4666.76	8096.03	3624.08
8-qE1-3748	18.7469	-0.508088	0.000790204	33.9734	35.9079	2.42686	2.67936	0.610757	11288	2254.65	6.1849	0
4933408B17Rik	37.7961	-0.604511	0.000799606	53.7912	68.9044	13.7522	14.7365	62.908	5405.99	1043.4	701.367	58.8324
Hs6st2	2216.67	0.345134	0.000830853	1854.38	2008.9	2522.32	2481.09	1878.69	41.8368	36.3374	0	51179.8
Gm3925	15.3991	-0.470176	0.000832943	31.1423	29.1145	0	1.33968	1.83227	38881.1	35479.1	50.7162	0
Gdpd4	42.7867	-0.614487	0.000833674	72.6653	64.052	21.0328	13.3968	6.10757	7151.83	2631.87	2.47396	0
Ms4a13	16.7607	-0.487666	0.000836851	33.0297	31.0555	1.61791	1.33968	1.22151	13403.6	25562.5	724.87	0
Egr1	785.669	-0.507407	0.000841834	795.544	1110.23	605.906	630.99	20199	5199.07	1761.5	13134.2	3807.93
Nqo2	760.227	0.439422	0.000841899	648.326	609.464	927.061	856.056	384.777	442.113	3398.41	1069.99	2034.87
Rabl2	474.918	-0.491033	0.000845966	555.842	587.143	384.253	372.431	1537.89	4948.05	16005.8	2242.64	669.954
4933434I20Rik	15.1378	-0.454199	0.000851823	20.7615	39.7899	0	0	0.610757	6631.7	4367.41	0	0
1700028K03Rik	114.804	-0.644095	0.000855477	141.556	174.687	67.9521	75.0222	3.66454	1183.87	1005.33	9.89584	0
Rad21	7493.83	0.282837	0.000868352	6739.94	6705.08	8125.13	8405.16	22085.6	3948.49	11219.6	18946.8	7465.84
Atp6v1h	2781.99	-0.349069	0.000879106	3000.04	3293.83	2527.17	2306.93	6337.83	11329.9	4152.85	4872.46	27549
Catsper2	144.042	-0.630029	0.00088519	174.585	211.566	92.2207	97.7967	198.496	81471	97036.4	4157.49	678.044
Prdm9	602.09	-0.460488	0.000908205	704.004	722.041	473.238	509.079	107.493	329.041	683.489	3255.73	167.672
Stra8	5215.4	0.556099	0.000913356	3689.89	4134.26	5805.86	7231.6	580.83	698.788	721.557	1.23698	1.47081
Rpl35	321.935	-0.553468	0.00094927	440.71	363.932	254.011	229.086	406.764	534.833	1567.7	160.807	942.79
Ttbk2	1072.42	-0.392758	0.000957174	1260.79	1207.28	913.309	908.304	2492.5	24057.3	50370.6	5925.13	916.315
Fbrs	513.689	-0.474068	0.00100485	610.577	616.258	420.656	407.263	1353.44	4593	2277.14	1997.72	1639.95
Swt1	2541.69	-0.333584	0.00101377	2757.51	2958.04	2271.54	2179.66	1810.28	2860.73	11539.7	3185.22	989.856
Nsun7	28.5234	-0.56322	0.00102616	49.0727	47.5538	8.08954	9.37777	14.0474	15913.8	30758.7	1902.47	209.591
Sav1	1104.77	-0.389429	0.00103225	1243.8	1296.57	956.992	921.701	4493.34	21750.6	5338.14	2028.65	4968.4
Rb1cc1	2066.32	-0.343475	0.00103721	2246.96	2415.54	1786.17	1816.61	9496.05	106883	100667	11333.2	7297.43
Cog6	1933.42	-0.358849	0.00103937	2072.38	2317.52	1678.58	1665.22	1116.46	30413.1	25557.3	3120.9	1870.87
Scml2	5566.22	-0.287887	0.00104417	6117.1	6185.87	5060.01	4901.89	3077.61	660.343	2834.32	19.7917	14.7081
Slc30a1	1900.25	0.345882	0.00104734	1672.25	1638.18	2210.06	2080.53	4938.58	2699.04	7487.23	3388.09	1681.14
bartel:linc878	1796.85	0.343619	0.00104985	1575.04	1556.66	2012.68	2043.01	827.576	704.441	2348.09	3.71094	0
Iqub	33.1563	-0.577876	0.00112283	49.0727	60.1701	11.3254	12.0571	208.268	17664.2	41530.2	29.6875	0.735406
Fbxo30	1153.25	-0.385319	0.0011359	1298.54	1349.94	1012	952.514	4528.15	23376.6	45589.6	1801.04	1618.63
Asz1	1393.94	-0.384163	0.0011978	1526.92	1668.26	1129.3	1251.26	1299.69	6725.55	5088.97	3.71094	0
Tcfl5	1341.3	-0.373759	0.0011978	1469.35	1594.51	1143.86	1157.48	672.444	62726.9	50920.8	294.401	2315.06
Fmnl3	705.754	-0.433966	0.00120276	842.729	810.355	567.077	602.857	3187.54	2773.67	1546.93	3837.11	2263.58
BC004004	1732.93	-0.359048	0.00121293	1893.07	2044.81	1548.34	1445.52	746.956	1175.95	1405.05	2535.81	2929.12
Mum1	1362.51	-0.368993	0.00122066	1539.18	1565.39	1131.73	1213.75	1421.23	62143.5	54694.7	1950.72	776.588
Pih1d3	14.316	-0.449224	0.00122453	28.3112	28.1441	0.808954	0	1.22151	5343.8	1960.49	6.1849	0
Rnf19b	1338.07	-0.364057	0.00123654	1509.93	1535.31	1157.61	1149.45	4772.46	28537.2	51232.3	857.227	1715.7
Acss1	1178.49	0.376331	0.00124629	1028.64	989.894	1343.67	1351.74	291.942	253.282	173.035	998.243	59.5679
Zufsp	349.788	-0.521844	0.00126428	403.906	454.187	267.764	273.295	768.333	4839.5	723.287	2496.22	742.024
6-qF3-28913	22.9322	-0.51098	0.00127684	31.1423	51.4357	6.47163	2.67936	0	5528.11	768.276	8.65886	2.20622
Tagap1	255.793	-0.566513	0.00128196	311.423	337.729	207.901	166.121	622.362	1697.22	2434.61	1425	358.878
Ncoa5	1127.74	-0.420202	0.0012864	1190.01	1439.23	966.7	915.002	4019.39	11549.2	8046.14	3691.15	1993.68
H2-D1	347.256	-0.529577	0.00129456	422.78	435.748	292.032	238.463	2482.12	334.694	311.463	5079.04	1751
Syce1	1446.36	-0.367499	0.0013063	1575.04	1720.67	1230.42	1259.3	903.31	118422	127091	227.604	36.7703
4930511M11Rik	13.662	-0.435043	0.00132313	23.5926	31.0555	0	0	0	26408.1	19405.9	22.2656	0
Sprtn	437.1	-0.517415	0.00133236	469.022	600.73	331.671	346.977	2139.48	30795.3	6693	1734.25	623.624
Pnma1	21.5492	-0.508788	0.00136365	45.2979	32.026	4.85372	4.01904	67.7941	7820.09	6203.31	7.42188	43.3889
Abca3	597.432	0.45649	0.0013669	518.094	455.157	699.745	716.73	2044.2	360.701	174.766	48998	1632.6
Efhc1	125.942	-0.629056	0.0013669	137.781	213.507	88.176	64.3047	200.939	49210.3	67938.8	176.888	181.645
Akap3	30.9759	-0.54414	0.00144591	40.5793	65.0225	12.9433	5.35873	4.2753	15096.3	122424	293.164	0
F11r	2110.49	0.326641	0.00144591	1848.72	1860.42	2401.78	2331.05	11711.3	391.231	231.867	6677.22	21984.2
Lrriq1	35.5336	-0.576649	0.00145067	51.9038	63.0815	13.7522	13.3968	362.79	9379.36	17021.5	145.964	43.3889
Fam63b	698.788	0.437808	0.00145643	579.435	575.497	871.243	768.977	1749.21	877.442	294.16	4651.04	2706.29
Cluap1	681.251	-0.452121	0.00146441	745.527	864.702	530.674	584.101	1605.68	11967.6	23031	2339.13	3623.34
Enthd1	57.1138	-0.616914	0.00146528	82.1024	88.3141	25.8865	32.1524	38.4777	3601.36	3415.72	1.23698	0
Rplp1	3986.64	-0.295139	0.0014766	4447.68	4386.59	3481.74	3630.54	3006.15	2926.32	2950.25	2018.75	15409.7
Exd2	1124.59	-0.383174	0.00151055	1240.03	1341.21	973.98	943.136	875.215	5532.64	1633.45	1825.78	462.57
Edc4	1443.35	-0.36056	0.00155623	1652.43	1631.38	1295.94	1193.66	3319.47	15857.3	4727.32	5220.05	1420.07
Ttc18	49.4633	-0.602188	0.00158991	78.3275	72.7864	18.6059	28.1333	208.268	41461.4	27066.2	145.964	3.67703
Q8R0C3-2	41.9086	-0.591689	0.00159337	66.0594	65.0225	17.797	18.7555	11.6044	4018.6	3787.74	211.524	4.41243
Tmem5	1188.61	-0.369596	0.00161478	1345.72	1365.47	1002.29	1040.93	2215.83	762.108	591.78	758.268	9672.05
Cebpg	714.464	-0.423234	0.00163556	814.418	853.056	580.829	609.555	5038.75	10781.5	10453.1	3112.24	2195.19
Prss44	25.0428	-0.528091	0.00166527	40.5793	45.6128	7.28058	6.69841	3.66454	5960.05	1979.52	11.1328	0
Rnf6	1727.24	-0.340826	0.00171352	1894.02	2003.08	1516.79	1495.08	6979.73	23926.1	4282.62	12414.3	8224.04
Atl1	381.393	-0.496179	0.0017439	464.303	460.98	312.256	288.032	144.749	6484.71	5088.97	476.237	511.107
Pole4	1463.97	-0.362799	0.00178598	1609.02	1725.52	1312.93	1208.39	1878.69	1811.42	1112.62	682.813	1864.25
Tuba3b	3524.71	-0.297877	0.00179108	3828.61	3994.52	3178.38	3097.34	1773.64	105678	64177	136.068	2.20622
Ccdc122	789.987	-0.444446	0.0017922	947.48	912.256	576.784	723.428	351.796	1251.71	1048.59	390.886	4843.38
Pcx	1057.66	-0.376767	0.00179305	1212.66	1209.22	916.545	892.228	1365.65	1390.79	617.736	3065.24	658.188
Usp9y	902.29	-0.405024	0.00179355	1083.37	1009.3	794.393	722.088	402.489	149.256	1093.58	0	10.2957
Letm2	234.313	-0.56658	0.00179577	262.35	333.847	164.218	176.838	244.303	16863.6	32942.4	1812.18	358.143
Spata17	44.5232	-0.586206	0.0018073	56.6223	82.4912	20.2238	18.7555	40.9207	10668.4	16099.2	116.276	13.2373
Rabl5	290.879	-0.538718	0.00183306	328.409	396.928	226.507	211.67	335.916	5320.06	6146.21	389.649	381.675
4933406C10Rik	41.9452	-0.579402	0.00185173	75.4964	56.2881	14.5612	21.4349	13.4367	2242.23	1742.46	239.974	5.14784
Acyp1	350.703	-0.503167	0.00187706	413.343	440.6	274.235	274.635	67.7941	13288.3	10643.4	111.328	307.4
Gm595	193.446	-0.58532	0.00187706	228.377	272.706	117.298	155.403	219.873	1958.42	16208.2	8.65886	3.67703
Zfp473	135.121	-0.607854	0.00187706	154.768	209.625	93.0297	83.0603	78.1769	929.456	366.835	24.7396	24.2684
Mag	20.4675	-0.480309	0.00188883	29.2549	45.6128	5.66268	1.33968	6.71833	2451.41	1212.98	13.6068	7.35406
Gtf3c3	725.869	-0.426494	0.00189467	816.305	880.23	571.93	635.009	1004.08	2311.2	1302.96	1224.61	1254.6
Cks2	270.924	-0.554727	0.00194978	329.353	357.138	229.743	167.46	162.461	2258.06	384.138	53.1901	110.311
Uimc1	2234.07	-0.33279	0.00198294	2440.42	2581.49	1868.68	2045.69	2571.9	3302.85	2242.54	9313.22	8832.96
Trim41	1727.91	-0.386802	0.00200394	1834.56	2135.07	1359.85	1582.16	2653.74	9667.7	11956.7	4251.5	2552.59
Ptp4a3	790.965	0.418593	0.00211234	696.455	624.022	965.891	877.491	483.72	352.786	2232.15	178.125	775.853
Adam30	13.6283	-0.422968	0.00215811	22.6489	31.0555	0.808954	0	9.16136	12788.5	17253.3	32.1615	0
Ankrd45	189.006	-0.570311	0.00217183	228.377	256.208	129.433	142.006	247.357	7964.82	11389.2	8.65886	33.8287
uc008kvv.1	45.8698	-0.586953	0.00217183	67.9468	72.7864	22.6507	20.0952	69.0156	530.31	269.935	211.524	52.9492
uc008rvd.1	25.2249	-0.51974	0.00219215	43.4104	42.7013	8.08954	6.69841	3.66454	1450.72	1218.17	71.7448	1.47081
Defb36	2287.45	0.345037	0.00219598	1927.99	2054.52	2758.53	2408.75	185.67	56.5362	167.844	0	2090.76
Dynlrb2	16.9493	-0.457862	0.0022498	29.2549	33.967	3.23582	1.33968	200.328	4476.54	6391.92	3.71094	0
Atp6v1d	2090.07	-0.384274	0.00235398	2154.48	2645.54	1675.34	1884.93	2627.48	24986.8	15305	5419.21	24641.2
Rpl18a	602.539	-0.431838	0.00239793	732.315	682.251	495.889	499.701	2030.77	1467.68	1680.17	714.974	3592.46
Mtbp	1045.14	-0.392047	0.0024006	1142.83	1264.54	838.076	935.098	2263.47	3656.76	4940.16	731.055	891.312
Prss48	28.7914	-0.525309	0.00244194	58.5097	37.8489	8.08954	10.7175	4.2753	520.133	380.677	0	0
Gramd1c	118.087	-0.60181	0.00245451	180.248	139.75	67.9521	84.3999	257.129	20656.1	15623.3	1459.64	193.412
Phf17	2746.71	0.311926	0.00246074	2410.22	2449.5	3194.56	2932.56	6444.71	356.178	638.5	7715.04	8683.67
Cenpa	969.356	0.375884	0.00247155	823.855	833.646	1106.65	1113.28	2281.18	134.556	198.99	226.367	696.429
Ddb2	1248.9	-0.376495	0.0024897	1404.23	1452.82	991.777	1146.77	411.04	477.166	524.297	3766.6	437.566
Dek	3877.27	0.32396	0.00254263	3525.68	3285.09	4049.62	4648.69	7015.16	1502.73	6814.13	2796.81	4516.13
D14Abb1e	2294.22	-0.317907	0.00256615	2659.36	2471.82	1997.31	2048.37	4620.99	8819.65	4784.42	24228.7	1542.88
Cenpc1	1017.87	-0.374981	0.00259589	1140.94	1190.78	893.085	846.679	1994.73	6100.26	1950.11	2767.12	1700.99
Thoc1	2333.88	-0.33241	0.00261361	2548.95	2697.95	1923.69	2164.93	4082.3	16019	15389.8	4736.39	4606.58
Eif2s2	1965.66	-0.317568	0.00264542	2201.66	2194.27	1711.75	1754.98	12258.5	13720.2	10321.6	2565.5	26673.2
Rfk	879.169	0.401101	0.00265246	745.527	737.568	1086.42	947.155	2209.72	636.598	2834.32	1144.21	2462.87
14-qC1-1261	12.4355	-0.40294	0.00265809	25.48	24.2621	0	0	0	4953.7	214.564	12.3698	5.88324
Als2cr11	143.696	-0.584822	0.00268274	175.529	203.802	104.355	91.0983	31.1486	35952.5	53348.5	76.6927	1.47081
Mbtps1	4881.11	0.277397	0.00268671	4462.78	4309.92	5473.38	5278.34	8196.97	1201.96	1237.2	12347.5	4140.33
Rpl41	1988.58	-0.316523	0.00269594	2230.92	2216.59	1777.27	1729.53	7213.65	11886.2	16497.2	7618.56	13256.4
Hif1a	4619.63	0.280196	0.00274485	4245.73	4045.95	5168.41	5018.45	24149.3	803.945	693.871	10900.3	36448.2
Usp15	1949.63	-0.326299	0.00281352	2128.06	2250.55	1762.71	1657.19	6048.94	36966.8	96043.2	12012.3	7211.39
Knstrn	562.028	0.446401	0.00282243	439.767	476.508	620.468	711.371	761.004	4987.63	25328.9	625.912	917.786
Adss	2666.83	-0.338312	0.00286318	2799.97	3212.3	2222.2	2432.86	9414.21	21287	18945.6	5510.74	9627.93
Baz2a	2898.26	-0.306723	0.00291025	3209.54	3243.36	2452.75	2687.4	6290.19	27580.6	27950.4	21168.4	2379.04
Adad2	250.199	-0.528803	0.00292363	297.267	325.112	182.824	195.593	114.212	3564.04	783.85	18.5547	0
Hdgfrp2	1615.64	-0.401059	0.0029634	1697.73	2040.93	1228.8	1495.08	3971.14	23186.6	24302.8	5456.32	6087.69
Smarca2	3010.77	0.328001	0.0029634	2602.74	2672.71	3129.03	3638.57	7347.41	53088.7	55608.3	112218	9950.77
Mro	4234.11	0.300007	0.00302094	3922.98	3607.29	4886.08	4520.09	2065.58	186.57	288.969	241.211	264.746
Naa15	3214.19	-0.289302	0.00302094	3496.43	3617.97	2900.91	2841.46	15476	29081.1	25688.8	10001	9786.04
Ttc39d	32.3343	-0.539078	0.00305209	50.9601	53.3767	12.9433	12.0571	1.83227	11937.1	32238.2	280.794	0.735406
Rhou	1148.27	0.390889	0.0031856	987.116	960.78	1448.84	1196.34	7342.52	433.068	468.925	3880.4	2746.74
Dyx1c1	156.645	-0.580138	0.0031977	170.811	242.621	105.973	107.175	102.607	11714.3	2349.82	352.539	291.221
S100pbp	1123.82	-0.357664	0.00320313	1260.79	1293.66	952.139	988.685	784.212	993.907	1162.8	679.102	322.843
Cmtm2a	16.4842	-0.440873	0.00322526	26.4238	34.9375	3.23582	1.33968	0.610757	49453.4	65724	76.6927	0
Btaf1	3173.06	-0.286747	0.0032533	3540.78	3476.28	2868.55	2806.63	8107.19	30669.8	16209.9	12348.8	2342.27
Lrrc51	204.42	-0.547729	0.00326928	238.757	279.5	148.039	151.384	115.433	13417.2	46006.6	2499.94	50.743
St7	173.828	-0.562516	0.00327878	216.109	232.916	135.095	111.194	674.887	794.899	880.749	413.151	1203.12
Setdb1	3014.84	-0.290525	0.00332343	3320.9	3356.91	2746.4	2635.15	6356.76	11259.8	6163.51	7416.93	2276.82
Mapre3	235.769	-0.529008	0.00339736	284.999	302.791	169.071	186.216	1188.53	12647.2	30483.6	2161	5394.2
Ptbp3	3350.24	0.307255	0.00345029	3116.12	2820.23	3859.52	3605.08	17945.3	3264.4	2123.14	33048.4	13753.6
Nuf2	1143.23	-0.376058	0.00346865	1236.25	1386.82	1024.14	925.72	1377.26	23118.8	18063.1	283.268	845.716
uc009evj.1	31.8129	-0.529598	0.00346865	52.8475	50.4652	14.5612	9.37777	12.2151	466.989	157.462	76.6927	16.9143
Pou6f1	237.862	-0.548461	0.00349352	263.294	339.67	152.892	195.593	1302.75	9333	1564.24	4877.41	816.3
Nipbl	3078.13	-0.29446	0.00361417	3414.33	3409.31	2642.04	2846.82	17254.5	69764.6	68573.9	21852.5	4921.33
Med12	1278.6	-0.365149	0.00367587	1544.85	1370.32	1052.45	1146.77	3138.07	538.225	2114.49	6919.66	810.417
Tmed5	1423.75	0.333131	0.0037199	1264.57	1224.75	1615.48	1590.2	4903.77	4388.34	1751.12	2383.66	7579.83
5-qG2-2301	48.4766	-0.562058	0.00376571	65.1157	81.5207	17.797	29.473	24.4303	6449.65	719.826	608.594	155.906
AU040320	965.689	-0.372826	0.00382736	1058.84	1152.94	836.458	814.526	1041.34	7675.36	7582.4	9450.52	909.697
Recql	1134.49	-0.353064	0.00382736	1261.73	1315.01	996.631	964.571	1051.72	9330.74	10788.7	5602.28	1936.32
Creld2	1483.86	-0.337023	0.00386721	1606.19	1740.08	1278.96	1310.21	1738.83	16679.3	41334.7	2535.81	2985.01
Ypel1	334.705	-0.490471	0.00386799	406.737	405.663	241.068	285.352	183.227	39845.6	29038.8	90.2995	111.782
Osr1	219.577	0.528102	0.00387458	164.205	164.982	271.808	277.314	34.8132	42.9675	17.3035	1.23698	329.462
Stk10	696.418	0.396417	0.00394398	590.76	583.261	802.482	809.168	1547.05	7329.36	10013.5	371.094	1595.83
Gnptg	771.141	-0.404255	0.00394714	834.236	957.868	664.151	628.311	645.57	1387.4	1102.23	4455.6	1565.68
Mcm5	2777.78	-0.289433	0.00394714	3025.52	3123.99	2477.83	2483.77	2212.16	900.057	1299.49	742.188	363.29
6-qC3-2394	46.106	-0.55305	0.00397386	61.3408	79.5797	15.3701	28.1333	4.2753	8588.98	1595.38	21.0287	0
Gsto2	136.158	-0.570749	0.00399443	169.867	189.245	101.119	84.3999	95.2781	22199.5	42340	649.414	78.6884
Nek2	1246.58	-0.353253	0.00400033	1342.89	1487.75	1071.86	1083.8	1534.83	48590.6	26694.1	278.32	237.536
Ppp3r1	3748.92	0.317585	0.00406569	3379.41	3229.77	4522.86	3863.64	7081.12	732.71	2946.79	4889.78	9458.79
Stpg2	46.7796	-0.557292	0.00409858	58.5097	83.4617	21.0328	24.1143	10.3829	2120.11	2078.15	176.888	0.735406
4931428L18Rik	22.9464	-0.481987	0.00410954	33.9734	44.6423	6.47163	6.69841	7.32909	975.815	1159.34	0	0
Heatr5b	1734.5	-0.320119	0.00416772	1944.03	1940	1477.15	1576.81	2064.97	2455.93	2564.38	4632.49	2018.69
Klf6	1379.57	0.342354	0.00423299	1214.55	1186.9	1632.47	1484.37	83993.8	1443.94	479.308	17462.4	9172.71
Pcdh17	42.3958	-0.550594	0.00423299	58.5097	71.8159	21.8418	17.4159	664.504	171.87	1064.17	13.6068	19.856
Pde6d	935.526	-0.387166	0.00423299	1015.43	1143.23	833.222	750.222	450.739	9736.67	9506.55	766.927	1538.47
10-qC1-2617	13.4713	-0.404083	0.00429908	23.5926	28.1441	0.808954	1.33968	1.22151	3619.45	207.642	0	0
Caps2	12.3885	-0.390485	0.00429908	26.4238	22.3211	0.808954	0	70.8478	2676.43	2803.17	1669.92	1.47081
6430531B16Rik	25.4714	-0.481105	0.00432873	33.9734	53.3767	10.5164	4.01904	34.8132	8877.32	4376.06	7.42188	14.7081
Arl13b	742.857	-0.395819	0.00444611	814.418	904.492	618.85	633.669	2066.8	3059.74	18938.7	2008.85	845.716
1-qD-4525	12.4286	-0.388391	0.0044794	20.7615	28.1441	0.808954	0	0	3132.11	539.87	0	0
Klhl7	2079.45	-0.334513	0.00449406	2185.62	2503.85	1884.05	1744.27	3555.22	5687.54	8833.45	1573.44	4935.31
Nrbp1	3992.94	-0.271413	0.00461315	4408.99	4370.09	3524.61	3668.05	8992.79	3895.35	4429.7	7655.67	10428.1
Sccpdh	1958.07	-0.322085	0.00464168	2087.48	2305.87	1764.33	1674.6	2578.01	82122.3	105590	1609.31	4189.61
4930453N24Rik	615.228	-0.404952	0.00468135	722.878	707.483	516.113	514.438	1892.74	50597.7	127752	4793.3	3067.38
Far1	2828.62	-0.291009	0.00468135	3120.83	3149.22	2608.88	2435.54	6234	5424.09	4033.45	15328.7	3991.05
Wdr20b	35.2489	-0.530597	0.00468189	59.4534	51.4357	15.3701	14.7365	1.83227	19862.3	13886.1	33.3984	0
Med26	499.145	-0.431132	0.00469272	566.223	609.464	410.949	409.943	959.5	15489.8	15332.7	718.685	405.944
uc008qgg.1	116.876	-0.570774	0.00470979	160.43	150.425	69.57	87.0793	31.1486	969.031	169.575	337.695	54.42
Synj1	1073.18	-0.353389	0.00472904	1257.96	1180.11	926.252	928.399	2352.03	3041.65	2607.64	14736.1	1325.2
Vezf1	1273.36	0.334023	0.0047932	1122.07	1101.5	1435.08	1434.8	3788.53	687.481	500.072	3634.25	3620.4
4930422G04Rik	736.952	-0.395244	0.00480466	852.166	851.115	584.065	660.463	751.231	2347.38	2581.69	1342.12	244.155
Lancl1	1656.92	-0.320881	0.00480466	1796.82	1918.65	1474.72	1437.48	955.835	32151	43906	4324.48	1336.23
Plk1	854.141	0.37436	0.00490149	720.991	738.539	1015.24	941.796	398.824	6304.92	10960.1	84.1146	288.279
Prss45	27.9508	-0.495447	0.00492663	43.4104	48.5242	6.47163	13.3968	7.93984	4161.07	3144.05	9.89584	0
Stk36	129.148	-0.562454	0.00498101	160.43	179.54	92.2207	84.3999	346.299	6512.97	17284.5	477.474	121.342
Supt20	1305.64	-0.331203	0.0050324	1484.45	1454.76	1136.58	1146.77	3762.26	60517.5	64979.9	8875.33	947.202
Ccdc13	47.7642	-0.552162	0.00512336	74.5527	68.9044	27.5044	20.0952	84.2845	21870.5	24565.8	30.9245	0.735406
Efr3a	3072.06	-0.28552	0.00518186	3336.94	3458.81	2830.53	2661.95	5973.82	9279.86	16142.5	6245.51	5625.85
Fyttd1	4913.58	-0.26621	0.00518186	5399.88	5389.1	4568.97	4296.36	9505.22	58868.9	30180.8	11398.8	6914.28
9-qF4-150	20.7243	-0.460163	0.00526096	32.086	39.7899	5.66268	5.35873	3.66454	974.685	211.103	8.65886	0.735406
Zmynd19	1118.55	-0.378472	0.00528086	1209.83	1356.74	876.097	1031.55	1972.14	4520.64	3599.13	481.185	752.32
Npm3	552.028	-0.414397	0.00529364	636.057	653.136	447.351	471.568	391.495	3017.9	2448.45	197.917	755.262
1700011E24Rik	12.4487	-0.379061	0.00534671	17.9304	31.0555	0.808954	0	0	19636.2	19283	13.6068	1.47081
Aamp	2662.41	-0.321474	0.00546981	2756.56	3213.27	2276.4	2403.39	9693.33	47727.9	50207.9	8506.71	15078.8
Rad18	945.183	-0.360462	0.00546981	1048.46	1105.38	797.628	829.263	3831.28	12947.9	10838.9	1643.95	1607.6
Setd8	1713.83	0.314627	0.00561697	1516.53	1503.28	1850.08	1985.41	6622.44	2381.31	1401.59	3082.55	7316.55
Morn2	163.812	-0.547527	0.00566343	184.023	238.739	113.254	119.232	180.173	25353.1	50640.5	562.826	374.321
Strada	612.716	-0.404437	0.00574166	718.16	705.542	488.608	538.552	305.989	9057.1	7198.26	800.326	384.617
Gm5134	20.4656	-0.44759	0.00591788	31.1423	40.7604	7.28058	2.67936	0	6571.77	1825.52	1.23698	8.08946
Atp11b	3304.21	-0.278834	0.00597403	3605.9	3685.9	3059.46	2865.58	8796.13	5461.4	3498.77	15407.8	4151.36
Ctcf	2445.55	0.292543	0.00608497	2190.34	2166.12	2617.77	2807.97	4329.05	2580.31	3176.93	5273.24	2832.05
Cldn11	16993.3	0.243017	0.006213	15652.3	15336.6	19103.4	17880.7	3945.49	687.481	917.087	0	7572.47
Slc9b1	142.158	-0.546723	0.006213	176.473	192.156	103.546	96.4571	120.93	30250.3	28791.3	11.1328	17.6497
Tmem97	478.616	-0.426069	0.00636159	542.631	584.232	400.432	387.168	176.509	17787.4	15282.5	143.49	528.021
Cox8a	1564.33	0.316318	0.00642383	1361.77	1391.68	1697.99	1805.89	985.151	420.63	231.867	1407.68	4383.75
Tktl1	1923.8	-0.305192	0.00651407	2063.88	2224.35	1706.89	1700.06	518.533	223.883	910.165	1.23698	8.82487
Fam181a	16.0284	-0.412808	0.00658394	25.48	32.9965	1.61791	4.01904	0	4059.3	1102.23	1.23698	0
Pcgf5	1778.35	-0.316761	0.00663313	2084.65	1899.24	1604.96	1524.56	2332.48	5104.09	2098.92	282.031	3073.26
Smim8	628.836	-0.400315	0.0066467	689.849	771.535	531.483	522.476	141.085	4720.78	5282.77	283.268	533.169
Trim28	3225.85	-0.281306	0.00665594	3499.26	3627.67	2997.98	2778.5	9675.62	41389	27277.3	8496.81	3658.64
Spag5	993.369	-0.362757	0.00665624	1069.22	1200.49	878.524	825.244	1607.51	35466.3	27531.6	382.227	706.725
Snrnp200	4284.75	-0.25802	0.00669082	4675.12	4702.97	3853.05	3907.85	12296.4	29327.6	15085.2	20898.8	5975.91
Tmem30c	11.9635	-0.368269	0.0067513	17.9304	29.1145	0.808954	0	4.2753	9395.19	3490.12	12.3698	0
Ano10	662.915	-0.389774	0.00698988	733.259	799.679	561.414	557.307	1365.04	7173.32	3912.33	4169.86	2715.85
Anp32e	3161.81	0.284298	0.00724033	2705.6	2949.3	3415.4	3576.95	9635.92	682.958	614.275	6239.32	9957.39
Lpar3	2124.88	0.307885	0.00729105	1786.43	1973	2447.89	2292.19	437.913	152.648	195.53	1.23698	154.435
Osbpl8	1635.32	-0.319898	0.00729105	1828.9	1841.98	1515.98	1354.42	9147.92	7289.78	3881.18	12153.3	4588.2
Pabpc2	20.333	-0.43571	0.00729105	24.5363	46.5833	4.85372	5.35873	4.88606	157615	204239	178.125	6.61865
Cep44	529.178	-0.408832	0.00751678	608.69	627.904	455.441	424.679	1267.93	7796.35	5050.9	3696.09	1937.79
Tfam	1144.56	0.333721	0.00752255	989.947	1005.42	1257.92	1324.94	3913.73	2865.26	30577.1	2402.21	3713.8
Hook1	1970.62	-0.299075	0.00752829	2233.75	2146.71	1698.8	1803.21	3998.63	26923.7	132552	19030.9	249.302
Cep63	774.114	-0.39831	0.00753406	841.785	953.016	592.963	708.691	3952.82	194530	245445	7299.42	5616.29
Pms1	630.435	0.392609	0.00753406	529.419	530.855	696.509	764.958	511.204	149.256	434.318	566.537	679.515
Foxh1	15.8285	-0.411444	0.00757399	29.2549	28.1441	3.23582	2.67936	3.66454	316.603	403.172	3.71094	0
Tdrkh	1211.02	-0.327113	0.00757399	1369.32	1355.77	1076.72	1042.27	1074.32	5661.54	3438.21	1316.15	1545.82
Crat	653.759	-0.384985	0.00767895	732.315	776.388	551.706	554.628	495.324	69384.7	52305.1	1871.55	986.179
Tmx4	2307.41	-0.299892	0.0077418	2453.63	2682.42	2112.18	1981.39	2698.33	3885.17	10596.7	4853.91	2270.93
Ccdc103	45.5983	-0.53208	0.0078067	67.9468	67.9339	25.0776	21.4349	31.7594	2830.2	4665.03	44.5313	52.2138
3830403N18Rik	174.304	-0.525208	0.00790739	200.066	242.621	124.579	129.949	103.829	350.525	2912.18	2.47396	255.186
Rbpms2	467.47	-0.4377	0.0079223	506.77	603.642	400.432	359.035	999.81	289.465	342.61	28.4505	3064.43
Klhdc1	316.207	-0.468894	0.00799001	353.89	411.486	255.629	243.822	72.0694	1216.66	1604.04	482.422	127.961
Ccdc172	504.83	-0.439643	0.00816763	557.73	638.579	364.838	458.171	424.476	7319.18	3484.93	1.23698	0
Swi5	4148.06	-0.30258	0.00855727	4240.07	4998	3556.16	3798	3655.99	24053.9	13202.6	4252.74	14458.1
Jarid2	2136.5	-0.286626	0.00860785	2331.9	2396.13	1876.77	1941.2	4932.48	1708.52	3334.39	4257.68	661.13
Gm5878	14.9319	-0.3977	0.00876126	24.5363	30.085	2.42686	2.67936	1.22151	9152.08	813.265	0	0
Gm1564	5134.4	-0.300299	0.00890539	5334.77	6097.56	4846.44	4258.85	200.939	28178.8	11527.6	12.3698	0.735406
Copg2	3409.79	-0.263263	0.00919038	3675.73	3806.24	3120.13	3037.06	2001.45	10609.6	6274.26	11569.5	2409.92
Myo9a	3571.37	-0.268037	0.00925788	4065.48	3782.95	3185.66	3251.41	7818.91	22155.4	19748.5	9739.98	1286.22
Alg6	354.695	0.449994	0.00927564	306.704	263.001	419.038	430.038	191.167	296.25	41.5285	799.089	330.933
BC049762	79.5983	-0.544279	0.00931279	86.8209	135.868	50.1551	45.5492	14.6582	2799.67	22020.5	59.375	12.5019
Cmas	2335.98	0.279307	0.00935292	2052.56	2135.07	2589.46	2566.83	4348.59	1312.77	1140.3	2804.23	6171.52
Hhex	174.712	0.512485	0.00939642	129.288	130.045	226.507	213.009	791.541	340.348	148.81	48.2422	1677.46
Ttc30a2	15.2013	-0.39243	0.00942436	20.7615	34.9375	2.42686	2.67936	1.22151	10735.1	8444.12	25.9766	4.41243
Lztfl1	913.228	-0.34512	0.00955301	1014.48	1056.86	791.157	790.412	1648.43	23425.2	29694.6	4235.42	2300.35
Hspb11	765.137	-0.363448	0.00973327	876.702	871.495	631.793	680.558	189.946	1475.6	1187.02	74.2188	1320.79
8-qA2-343	11.4916	-0.349936	0.00987256	16.043	29.1145	0.808954	0	0	4674.42	705.984	2.47396	0
Syncrip	4840.19	0.253482	0.00995405	4349.54	4428.32	5130.38	5452.5	21957.9	4306.93	4787.88	11737.7	21327.5
Zpbp2	42.922	-0.515879	0.00996381	57.566	70.8454	21.8418	21.4349	7.93984	43059.1	48752.7	44.5313	14.7081
1700010B08Rik	13.6265	-0.38097	0.00998653	24.5363	26.2031	2.42686	1.33968	0	27526.4	16426.2	9.89584	0
Ncapg	2262.83	-0.285059	0.0100792	2417.77	2590.22	2045.84	1997.47	2292.17	17147.4	11795.8	453.972	561.114
Adam10	3601.68	0.26604	0.0100956	3270.88	3227.83	4104.63	3803.36	12067.3	770.023	536.409	16756.1	9046.22
Dpp8	1276.72	-0.314311	0.0101683	1432.54	1426.61	1135.77	1111.94	3940	19969.7	13842.8	12964.8	3302.71
Ulk2	1552.79	-0.313128	0.0101741	1711.88	1766.28	1437.51	1295.47	2741.08	19385.1	31656.8	8879.04	3361.54
Gm6402	596.261	-0.399745	0.0101852	725.709	659.93	463.531	535.873	707.257	852.566	844.412	311.719	1404.62
Sord	335.908	-0.452602	0.0101852	381.257	426.043	283.134	253.2	173.455	66531.8	104174	6584.44	316.96
4921536K21Rik	29.3736	-0.4757	0.0102716	53.7912	39.7899	10.5164	13.3968	75.7339	14059.4	15343	392.123	60.3033
Rps5	10156.8	-0.235223	0.0103295	10970.6	11078.1	9027.92	9550.59	12974.9	7530.63	6014.7	5358.6	15324.4
1700040L02Rik	199.964	-0.504283	0.0103892	224.602	276.588	155.319	143.346	180.173	33144.9	24522.6	460.156	78.6884
Cep85	3371.96	-0.293076	0.0104955	3571.92	3909.11	2814.35	3192.46	6077.65	29050.6	6192.93	4383.86	1011.92
Sp3	3076.74	0.266904	0.0105411	2729.2	2819.26	3465.56	3292.94	4386.46	1433.76	1848.02	2711.46	3464.5
Ppp5c	1063.07	-0.359551	0.0106353	1110.74	1318.89	950.521	872.133	1850.59	7633.52	1903.39	3363.35	1870.87
Gm19583	31.1518	-0.471994	0.0108356	37.7482	62.111	15.3701	9.37777	10.3829	383.316	102.091	0	0
Zfp800	1632.57	-0.302403	0.0109395	1762.84	1876.92	1481.19	1409.34	2721.53	8828.7	3618.17	3125.85	729.522
Fam170a	11.249	-0.344555	0.0109579	16.043	28.1441	0.808954	0	0	13127.7	15898.5	7.42188	11.7665
10-qB5.1-221	14.2939	-0.3831	0.0109834	27.3675	25.2326	3.23582	1.33968	0	2974.94	351.261	0	0
4930568E12Rik	11.3549	-0.348514	0.0111066	19.8178	24.2621	0	1.33968	1.22151	3082.36	2265.03	1.23698	0
Rpl7	1266.3	-0.314586	0.0111919	1449.53	1385.85	1101.8	1128.01	10260.7	6782.09	6784.71	3705.99	23513.9
Nek1	1737.98	-0.30788	0.011259	1826.07	2056.46	1547.53	1521.88	2610.99	5851.5	9572.31	4228	1200.18
Syt11	321.208	-0.446351	0.0113552	371.82	396.928	258.865	257.219	463.565	7708.15	4564.67	1220.9	1925.29
Gpr19	162.23	-0.51339	0.0114101	190.628	222.241	126.197	109.854	109.936	4047.99	2927.76	284.505	130.167
4930452G13Rik	16.8256	-0.392881	0.0114454	19.8178	40.7604	4.04477	2.67936	3.05379	8259.94	7314.2	7.42188	0
Atad5	1449.1	-0.304143	0.0115098	1626.95	1603.24	1250.64	1315.57	1688.13	344.871	1022.64	1227.08	261.804
Ccdc157	469.024	-0.405664	0.0115324	559.617	535.708	380.208	400.565	1145.78	5453.48	8278	2095.44	588.324
4930525D18Rik	14.4534	-0.383734	0.0115828	23.5926	29.1145	2.42686	2.67936	2.44303	2780.45	257.822	2.47396	0
Kit	3090.1	0.267947	0.0117427	2803.75	2765.88	3524.61	3266.14	2975.61	1122.81	605.623	810.222	2.94162
Smg9	332.819	-0.446671	0.0117427	380.313	415.367	251.585	284.012	683.437	17577.1	4289.54	1300.07	561.85
Abcd3	4209.34	0.263193	0.011786	3642.7	3959.58	4736.42	4498.65	5930.45	604.938	467.195	22511.8	12990.2
Dnaja4	254.714	-0.478638	0.0119237	281.224	342.581	186.059	208.99	1511.01	5720.34	44480.4	1838.15	1875.28
Gins1	439.963	-0.424603	0.0119237	475.628	562.881	346.232	375.111	255.907	3323.2	1538.28	138.542	90.4549
Mtap	887.179	0.350302	0.0119237	751.189	781.24	1063.77	952.514	3685.31	162.824	166.114	779.297	9636.75
Paip2b	2153.04	-0.277076	0.0119237	2338.5	2412.63	1947.96	1913.07	2391.73	1942.58	7322.85	2648.37	2632.02
Tcp11l2	545.321	-0.400685	0.0119237	594.534	678.369	475.665	432.717	950.949	939.632	681.759	1703.32	605.239
Ccdc38	20.4841	-0.42596	0.0120495	35.8608	33.967	8.08954	4.01904	3.66454	111990	100302	96.4844	0
Gm5136	35.4641	-0.487588	0.0121145	46.2416	63.0815	17.797	14.7365	4.88606	3648.85	3578.37	2.47396	0.735406
Spcs3	2226.02	-0.289033	0.0121145	2464.96	2473.77	2091.15	1874.21	5958.55	4944.66	1811.68	5827.41	9125.65
Mif4gd	1050.42	-0.33423	0.0121252	1137.16	1237.37	941.622	885.529	1231.9	34974.4	16478.1	5134.7	1678.93
2700049A03Rik	564.112	-0.391158	0.0121459	631.339	679.339	498.316	447.454	713.364	25484.3	21779.9	1303.78	607.445
Glyctk	87.8645	-0.532476	0.0121459	116.076	120.34	57.4357	57.6063	45.8068	2512.47	733.669	211.524	41.1827
Gm13718	477.261	-0.399584	0.0121465	550.18	561.911	396.387	400.565	431.805	281.55	571.016	16.0807	4.41243
Pdhb	2026.11	-0.2802	0.0122897	2228.09	2249.58	1851.7	1775.08	4475.02	15211.6	11145.2	3519.21	4925.01
Wdr31	200.313	-0.492225	0.0124407	242.532	254.267	138.331	166.121	246.135	12640.4	27159.6	352.539	45.5951
8030411F24Rik	1369.69	0.34567	0.0124732	1060.72	1309.18	1597.68	1511.16	235.752	76.8893	96.8997	0	1267.84
Acr	13.0985	-0.36334	0.0124901	20.7615	28.1441	0.808954	2.67936	4.88606	16095.9	26093.7	17.3177	0
Ankar	11.6805	-0.346279	0.0127424	17.9304	27.1736	1.61791	0	0.610757	26605.9	12043.3	12.3698	0
Ndufa1	1508.86	-0.305298	0.0127751	1611.85	1754.64	1310.51	1358.44	551.514	607.199	474.116	1156.58	2575.39
Ppp3cc	1185.1	-0.325457	0.0127948	1260.79	1406.23	1025.75	1047.63	844.677	22123.8	28073.2	341.406	2001.04
Zfp395	761.87	0.354774	0.0130805	679.468	629.845	852.637	885.529	1494.52	240.844	129.776	2627.34	761.88
Nup107	1637.05	-0.305422	0.0131291	1737.36	1918.65	1490.9	1401.31	3954.04	12199.4	5085.5	3127.08	5357.43
Ttc30a1	236.51	-0.474826	0.0132553	287.83	293.086	199.003	166.121	99.5534	4027.64	659.264	186.784	183.116
Sh3glb1	2397.9	-0.29403	0.0132701	2480.06	2848.37	2155.86	2107.32	14274	129895	214133	7929.04	23249.8
Zc3h8	472.98	-0.403306	0.0133409	547.349	556.088	370.501	417.981	578.998	1257.37	1804.76	1055.14	578.029
Mdh2	3202.99	0.294398	0.0134135	2930.21	2768.79	3844.15	3268.82	12289	2371.13	2522.85	6557.23	20933.3
Slc2a5	32.1594	-0.475564	0.0135041	46.2416	53.3767	12.9433	16.0762	16.4904	54832.2	75832.7	94.0104	5.14784
Arl6	652.972	-0.369303	0.0135718	718.16	782.211	566.268	545.25	610.146	3360.51	5068.2	842.383	1278.13
Ggh	876.745	-0.34039	0.0138269	987.116	1001.54	789.539	728.787	988.816	1966.33	2145.64	2610.03	9155.8
Fam186b	23.9082	-0.437426	0.0138817	31.1423	47.5538	8.89849	8.03809	6.10757	14467.6	13796.1	12.3698	30.1516
Ankef1	42.6657	-0.497906	0.0138844	60.3971	66.9634	25.8865	17.4159	26.8733	7648.22	48311.4	1072.46	0
Rarres1	875.675	0.35164	0.0139469	779.501	730.775	1061.35	931.079	370.73	264.59	22.4946	19.7917	450.068
Zc3h7a	1469.9	-0.299085	0.0140514	1634.5	1636.24	1261.16	1347.72	6652.98	8934.99	4601.01	25800.9	10657.5
Eno3	285.466	-0.453633	0.0141199	330.297	357.138	211.946	242.482	548.46	14694.9	5445.42	6401.37	685.398
Coro2a	625.594	0.386474	0.0141982	475.628	577.438	723.205	726.107	1288.09	3280.23	24455.1	25720.5	243.419
Zfp438	292.168	-0.455907	0.0141982	323.691	381.4	218.418	245.162	100.164	3576.48	7182.69	383.464	131.638
Tsacc	132.473	-0.511064	0.0142699	173.642	165.953	93.8386	96.4571	33.5916	3287.02	6992.35	118.75	50.743
Kif24	322.437	-0.434937	0.0143002	379.37	389.164	265.337	255.879	480.666	2925.18	1470.8	405.729	48.5368
Rnf130	2322.38	0.278087	0.0144088	2069.55	2095.28	2678.45	2446.26	1417.57	820.906	403.172	1338.41	3048.26
Cacng5	545.679	0.407748	0.0145784	450.147	456.128	715.115	561.327	11.6044	174.132	1422.35	0	0
Hrasls5	10.8764	-0.333893	0.0146185	18.8741	23.2916	0	1.33968	3.66454	72105.2	133491	1161.52	0
Ccdc144b	9.83366	-0.318348	0.014681	16.043	23.2916	0	0	0	10305.4	7816	1.23698	6.61865
Klf11	1145.97	0.33166	0.014681	1027.7	971.455	1381.69	1203.03	1826.77	222.753	190.339	588.802	506.694
Cpe	17247.7	0.220757	0.0147636	16303.5	15428.8	18587.3	18671.1	33119.5	4845.15	924.008	185.547	101197
Nt5dc2	798.696	0.35332	0.0153431	643.607	730.775	933.533	886.869	655.953	350.525	598.702	17.3177	1300.2
Ddx43	848.764	-0.355052	0.0154786	972.017	961.75	668.196	793.091	338.36	4897.17	1685.36	300.586	92.6611
Ubxn2b	571.297	-0.379581	0.0156058	630.395	688.074	464.339	502.381	277.284	436.46	378.947	2353.97	269.158
Apbb3	245.223	-0.464054	0.0156494	317.085	279.5	182.015	202.292	409.207	693.134	287.238	2488.8	166.937
March11	12.6065	-0.352235	0.0156648	21.7052	25.2326	0.808954	2.67936	9.16136	41711.3	48527.7	47.0052	0.735406
Spata5	4016.46	-0.2515	0.0156648	4225.91	4552.54	3674.27	3613.12	5988.47	15689.9	12799.4	1391.6	1604.65
Papolb	143.313	-0.50283	0.0158907	169.867	195.067	105.164	103.155	101.996	44049.6	87761.7	95.2474	155.906
5430417L22Rik	392.423	-0.412585	0.0159022	467.134	457.098	337.334	308.127	966.218	4902.82	4936.69	815.17	2056.19
Abcc12	12.5168	-0.341839	0.0159841	31.1423	16.4982	2.42686	0	14.0474	26739.4	13559	59.375	10.2957
Dlg1	2378.18	0.271219	0.0159841	2215.82	2058.4	2580.56	2657.93	9048.37	2112.19	3246.14	17206.4	8899.88
Hbb-b2	90.3876	-0.518133	0.0161106	111.357	130.045	59.8626	60.2857	8.5506	0	0	0	0
4933402E13Rik	7035.71	0.267155	0.0161523	6058.59	6609.97	7227.19	8247.08	676.719	221.622	413.554	1.23698	20.5914
H2-Ab1	88.1824	-0.518275	0.0161642	133.062	103.842	54.1999	61.6253	544.795	353.917	771.737	2558.07	340.493
1700028J19Rik	32.1391	-0.466799	0.0162408	50.0164	49.4947	16.988	12.0571	6.10757	25855.1	21520.4	105.143	1.47081
Trim23	1431.42	-0.304479	0.0162408	1513.7	1681.85	1266.82	1263.32	2068.63	6313.97	2097.19	3762.89	1956.91
Gdpd1	894.011	0.33138	0.0162493	804.037	753.096	1012.81	1006.1	823.912	6490.36	16891.7	1468.29	1378.89
Ccdc19	23.1535	-0.431455	0.016309	34.9171	40.7604	8.89849	8.03809	445.853	46116.6	103664	81.6407	408.15
Ankrd32	1094.64	-0.318417	0.0164761	1202.28	1253.87	923.016	999.402	1438.94	6233.68	5249.89	3605.8	1471.55
Timp3	2897.78	0.28666	0.016659	2526.3	2647.48	3452.61	2964.72	18415.6	1032.35	150.541	58.138	292850
Ormdl1	557.499	0.38538	0.0166608	501.108	437.689	676.285	614.914	384.777	178.654	88.248	460.156	1242.1
Xpo6	1973.61	-0.28085	0.0167485	2258.29	2106.92	1810.44	1718.81	6688.4	22997.8	30049.3	8870.38	2742.33
Trove2	649.005	0.361639	0.0168243	571.885	538.619	770.124	715.39	4089.02	68.9742	136.698	2407.16	2195.19
Atf7ip2	378.616	-0.417311	0.0171962	469.022	426.043	326.008	293.39	158.186	6221.25	4703.1	9.89584	25.0038
Sympk	1131.96	-0.312883	0.0173268	1223.04	1314.04	1008.77	981.987	4810.32	10651.4	15170	7120.05	3151.95
Pcnxl3	1006.76	-0.317031	0.0174518	1138.11	1120.91	870.434	897.587	2521.21	4024.25	3234.03	6089.65	1514.94
Casc4	2136.34	0.269195	0.0175379	1973.29	1870.12	2346.77	2355.16	6958.97	6367.11	11238.6	169.466	8418.92
2610301B20Rik	783.529	-0.345383	0.0175617	855.941	926.813	698.936	652.425	946.674	15849.4	7303.82	1421.29	1928.23
Dazap2	5768.54	-0.242233	0.017635	6159.56	6408.11	5461.25	5045.24	4024.28	6242.73	5691.13	4127.8	8228.45
Cul9	331.107	-0.422505	0.0177358	391.638	393.046	271.808	267.936	757.339	6756.08	3661.43	6771.23	1759.09
Rbl1	830.115	-0.334716	0.0178044	932.381	944.282	698.936	744.863	897.813	3319.81	1228.55	2532.1	359.613
Fam199x	776.46	0.353819	0.017823	719.103	614.317	888.231	884.19	1403.52	62.1899	103.821	6974.09	1053.84
Shc4	1140.37	0.318598	0.017823	964.467	1037.45	1340.44	1219.11	177.12	352.786	385.869	29.6875	1370.06
Rras2	4322.12	0.241019	0.0178239	4035.28	3845.06	4772.83	4635.3	19047.1	194.485	228.406	2822.79	38798.5
Cbfb	3057.66	0.273529	0.0178646	2846.22	2646.51	3556.16	3181.74	8925.61	2018.34	1552.13	2208.01	5477.3
Dock3	1187.28	-0.332131	0.0178646	1461.8	1220.87	1028.18	1038.25	1142.12	1217.79	2252.92	35.8724	67.6573
Carm1	604.9	-0.364251	0.0178873	669.087	719.129	520.966	510.419	1410.85	1699.48	5448.88	1676.11	788.355
Atrx	3797.76	0.28001	0.0179321	3612.5	3180.28	3967.92	4430.33	22593.1	807.337	506.993	68228.1	11658.4
Zdhhc13	1240.4	-0.332658	0.0179321	1328.74	1479.02	1166.51	987.345	2636.03	1895.09	872.097	4558.27	2585.69
Marcks	5550.45	0.234476	0.0181185	5045.05	5105.72	6200.63	5850.39	4183.69	435.329	275.126	2375	10333.9
Nfyb	1385.76	0.304503	0.0181185	1159.81	1287.83	1507.89	1587.52	4116.5	1321.82	821.917	6896.16	3621.87
Pikfyve	1973.79	-0.281303	0.0181185	2264.89	2098.19	1710.13	1821.97	3584.53	1756.02	1958.76	8895.12	2175.33
Atxn3	1003.19	0.324851	0.0181696	874.815	880.23	1189.97	1067.73	2159.64	6594.39	28988.6	7812.76	1381.83
Trmt1	958.281	-0.319994	0.0182698	1068.27	1086.94	856.682	821.225	2575.56	8884.1	9189.9	5077.8	2384.18
uc009uxy.1	455.104	-0.402215	0.0184507	554.899	508.534	347.041	409.943	142.306	122.118	1058.98	223.893	24.2684
AI846148	695.267	-0.357473	0.0186462	754.964	833.646	569.503	622.952	1962.36	1429.24	5727.47	943.815	1528.91
B230118H07Rik	600.429	-0.371526	0.0187051	647.382	736.598	523.393	494.342	481.277	23216	28606.2	1014.32	2971.77
1700003G18Rik	13.0715	-0.349364	0.0189269	18.8741	29.1145	1.61791	2.67936	3.66454	943.024	1610.96	189.258	0
Cdc20	1294.11	-0.307536	0.0189269	1395.74	1495.52	1088.85	1196.34	848.953	10563.2	6447.29	115.039	347.111
Vapb	3166.12	0.264227	0.0189269	2842.44	2862.93	3284.35	3674.75	1839.6	2791.76	2027.97	3506.84	7088.57
9-qA5.3-1495	10.0359	-0.315232	0.0190821	16.043	23.2916	0.808954	0	0	10682	842.681	2.47396	0
Plat	1955.69	0.267508	0.0190821	1757.18	1763.37	2141.3	2160.91	17603.2	79.1507	89.9783	0	6566.44
5830418K08Rik	1972.1	-0.268049	0.0192647	2188.45	2149.62	1753.81	1796.51	3603.47	7448.08	11039.6	4820.51	1102.37
Tmod3	2828.78	0.257208	0.0193776	2508.37	2611.57	3192.94	3002.23	10078.7	2132.55	1157.61	6323.44	6001.64
Rhov	106.303	-0.507721	0.019421	119.851	161.1	59.8626	84.3999	118.487	1587.54	1711.32	247.396	14.7081
Slc35f2	1359.31	0.292283	0.0194265	1206.06	1212.14	1546.72	1472.31	1436.5	143.602	147.08	14986	352.995
Chpt1	2017.32	0.285227	0.0200184	1759.07	1843.92	2367	2099.28	801.314	2765.75	6919.68	1688.48	1189.89
Nab1	974.778	0.32315	0.0202361	898.408	805.502	1095.32	1099.88	16897.8	676.173	328.767	15437.5	14794.9
Map3k10	484.866	-0.379657	0.0203425	548.293	574.527	417.42	399.225	1399.24	4577.17	3995.38	1562.31	1317.85
Man2a2	1533.99	0.315811	0.0206118	1468.41	1222.81	1669.68	1775.08	3193.65	4609.96	1522.71	12298.1	2584.95
Taf9b	2605.55	-0.25232	0.0210178	2842.44	2857.11	2400.97	2321.67	1118.3	637.729	3369	341.406	804.534
Dpy19l2	41.327	-0.473527	0.021412	51.9038	69.8749	19.4149	24.1143	18.3227	27878	30078.7	22.2656	0
uc009liy.1	13.31	-0.346995	0.0214689	29.2549	19.4097	3.23582	1.33968	4.2753	45040.2	43873.1	39.5833	0.735406
Hbb-b1	156.759	-0.486883	0.0216432	204.784	193.126	132.668	96.4571	22.598	0	0	12.3698	0
Uap1	1204.78	-0.311358	0.0217958	1263.62	1436.32	1066.2	1052.99	4396.23	1957.28	1237.2	3782.68	1725.26
Ccdc150	103.507	-0.500617	0.0218838	144.387	126.163	63.0984	80.3809	90.3921	10579.1	62154.2	2342.84	5.88324
Ift74	1966.66	-0.323319	0.0220009	2053.5	2371.86	1544.29	1896.99	3659.05	58836.1	81326.5	2441.8	7863.69
Pkd1	1437.91	-0.290922	0.0220009	1623.17	1568.3	1227.18	1332.98	4486.01	1286.76	1176.64	6709.38	2384.18
Pard6b	1621.04	0.284746	0.0222423	1514.65	1378.09	1809.63	1781.78	12856.4	130.033	129.776	1355.73	906.755
Adam32	23.5128	-0.408166	0.0222424	27.3675	49.4947	6.47163	10.7175	17.712	91490.3	116968	145.964	63.2449
Kdm5b	2595.66	-0.25606	0.0222424	2936.81	2748.41	2351.63	2345.78	9712.26	33433.3	23634.9	8663.8	4018.99
Ddt	579.714	-0.360037	0.0224708	638.889	690.015	494.271	495.682	613.2	38781.6	19869.6	1018.03	2204.01
Apbb2	342.774	0.412299	0.0227506	296.323	265.913	414.993	393.866	4509.83	59.9284	67.4837	112.565	2735.71
Dazl	20935.7	-0.234049	0.0227573	21602.4	23870	19848.5	18422	5193.88	7572.46	8194.95	8.65886	3.67703
Q8C9J1	165.91	-0.473633	0.0227573	200.066	212.536	123.77	127.27	99.5534	370.878	221.485	277.083	221.357
Rnf115	2286.85	0.258375	0.0227573	2026.14	2108.86	2547.4	2465.01	4078.64	2708.09	2014.13	3393.03	4902.21
Mgarp	3609.78	0.243863	0.0227635	3386.01	3185.13	4008.37	3859.62	1408.41	2068.1	321.845	7.42188	22775.5
Itgav	1303.6	0.299024	0.0230457	1154.15	1156.82	1528.92	1374.51	50131.6	261.197	200.721	9237.76	22232.8
Tmsb4x	22987.4	0.201834	0.0230599	21155	21467.1	24760.5	24567.1	70711	1757.15	6961.21	52126.3	515923
E130317F20Rik	86.3032	-0.49921	0.0231979	104.751	125.193	50.9641	64.3047	83.063	1831.77	610.814	476.237	386.823
Sept6	3848.61	0.242247	0.0232207	3373.75	3636.41	4217.89	4166.41	1512.85	759.847	531.218	294.401	981.031
Npm3-ps1	453.933	-0.392022	0.0234404	495.445	561.911	355.131	403.244	372.562	3005.47	2810.09	178.125	719.227
Lrrc56	164.197	-0.478302	0.0236581	181.191	230.975	125.388	119.232	295.607	17865.4	16083.6	1535.09	177.233
Usp47	5097.69	-0.237602	0.0236687	5366.85	5717.13	4510.73	4796.06	25505.8	79509.2	116486	41044.2	24570.6
Plekhg4	561.232	-0.361138	0.0237071	618.127	669.634	478.901	478.266	179.563	2230.92	735.4	50.7162	16.1789
Zfp574	338.639	-0.408405	0.0240323	386.919	411.486	281.516	274.635	756.117	16489.4	20918.2	857.227	361.084
Mcfd2	3248.7	0.246268	0.0240462	2982.11	2926.01	3667.8	3418.87	8798.57	5150.45	1353.14	4491.47	27041.6
Tjp2	1325.36	0.290519	0.0240962	1220.21	1136.44	1457.73	1487.05	20572.7	1024.44	6699.92	12582.6	2723.21
Mt2	2475.78	0.274895	0.0241103	2165.8	2276.76	2909.81	2550.75	5578.05	13136.8	7296.89	2388.61	9242.58
Gstt2	113.909	-0.491238	0.0243221	135.894	158.189	82.5133	79.0412	113.601	3626.23	1372.17	632.097	196.353
Taf4b	2102.34	-0.271194	0.0244765	2374.36	2262.2	1976.27	1796.51	2260.41	541.617	1012.26	335.221	247.096
Lancl2	815.061	-0.326865	0.0244839	892.745	948.164	728.058	691.276	2624.42	46210.5	50285.8	2502.41	1166.35
Nsmce4a	2145.07	0.257185	0.0247307	1969.51	1908.94	2330.6	2371.24	3044.01	5502.11	1403.32	3509.31	4138.13
Slc31a2	284.239	0.422696	0.0247307	225.546	234.857	338.952	337.6	693.82	248.759	825.378	3647.85	1797.33
Pcsk7	608.178	-0.348575	0.0247726	690.792	696.808	530.674	514.438	950.949	1509.52	1174.91	2195.64	475.807
uc008rph.1	68.0804	-0.493267	0.0248736	97.2017	88.3141	41.2566	45.5492	59.2435	335.825	328.767	239.974	29.4162
Sypl	2473.79	-0.301123	0.0249701	2624.44	2901.75	2400.97	1967.99	4209.95	3905.52	9961.64	4700.52	3038.7
Tex15	9902.82	-0.237474	0.0249701	11317.9	10216.3	8722.14	9355	2523.65	3180.73	18530.3	42.0573	69.8635
Epas1	2054.79	0.258568	0.0250679	1885.52	1827.42	2244.85	2261.38	7703.48	205.792	512.184	1293.88	1367.12
Lyrm1	210.819	-0.459285	0.0250679	236.87	282.411	177.97	146.025	54.3574	3288.15	3021.19	129.883	204.443
4930558K02Rik	17.5141	-0.378332	0.0251474	30.1986	29.1145	4.04477	6.69841	0	370.878	2093.73	0	1.47081
Stra6	646.495	0.345299	0.0251757	551.124	563.852	763.652	707.352	781.769	71.2356	60.5623	0	358.878
Cytip	1359.55	0.290616	0.0252009	1218.32	1201.46	1578.27	1440.16	723.137	88.1965	138.428	341.406	99.2798
uc009lkg.1	13.4535	-0.334711	0.025217	17.9304	31.0555	0.808954	4.01904	0	3681.64	4334.53	9.89584	0
Cftr	169.906	-0.466758	0.0252295	218.94	201.861	126.197	132.628	3528.34	1312.77	3721.99	11.1328	21.3268
Fbxl5	3336.57	-0.247713	0.0252846	3589.86	3699.49	3156.54	2900.41	4856.13	17775	12095.2	6067.38	3196.07
Rgs12	689.593	-0.337573	0.0253134	787.05	776.388	580.02	614.914	2138.26	5722.6	5822.63	154.622	1182.53
Zfp42	83.2108	-0.493774	0.0254212	108.526	113.547	59.8626	50.9079	86.7275	3366.17	1406.78	6.1849	0
Lrrc34	76.564	-0.338646	0.0254605	114.188	161.1	24.2686	6.69841	267.512	39469.1	89075.1	51.9531	1.47081
4932414N04Rik	8.87656	-0.288292	0.025469	14.1556	21.3507	0	0	0.610757	29325.3	27971.1	30.9245	3.67703
Cpeb1	833.02	-0.332059	0.0255853	1000.33	886.053	745.046	700.653	491.66	558.578	501.802	3216.15	2098.85
Tctex1d2	358.21	-0.411206	0.0255853	388.807	459.039	309.02	275.974	171.623	8834.35	10290.4	298.112	573.616
Mgst1	5055.51	0.225674	0.0263343	4748.73	4527.31	5516.26	5429.73	1425.51	1456.37	114.203	101.432	11334.8
Gm773	377.809	0.410651	0.0266314	308.592	307.644	393.96	501.041	250.41	151.517	436.049	0	0
AU015836	5180.98	0.225279	0.0267652	4699.65	4809.72	5741.95	5472.6	7252.74	262.328	442.97	3.71094	6951.79
Gsk3a	1219.09	-0.293864	0.0267652	1304.2	1409.14	1091.28	1071.75	2430.81	6140.97	4479.88	3078.84	2967.36
Q8BN46	83.6156	-0.490984	0.0267735	107.582	114.517	57.4357	54.9269	15.8797	179.785	155.732	0	0
Lpxn	50.4811	-0.473316	0.0269711	59.4534	84.4322	25.8865	32.1524	28.7056	6514.1	1451.77	1219.66	239.007
Tmeff1	3717.51	0.232465	0.0269711	3331.28	3468.51	4043.15	4027.08	3971.14	1183.87	5931.65	13.6068	19292.6
Fbxo3	2520.29	-0.278294	0.0270304	2644.26	2931.83	2397.74	2107.32	2040.54	9458.51	1965.68	5655.47	3438.02
Nadkd1	1104.26	0.297702	0.0270508	971.073	986.012	1267.63	1192.32	2266.52	6044.85	11242.1	8813.48	1904.7
Sh2b3	370.816	-0.392916	0.0271983	443.542	423.131	305.785	310.806	1159.22	6907.6	6147.94	398.307	351.524
Zfp871	1022.18	0.309884	0.0271983	948.424	849.174	1134.96	1156.15	4072.53	232.929	138.428	13030.3	1517.88
Lin54	753.421	0.330482	0.0276964	657.763	653.136	892.276	810.507	2235.37	3672.59	4130.35	2288.41	1361.24
AA414768	622.301	0.346596	0.0277047	525.644	543.471	677.903	742.184	2171.85	117.595	143.619	648.177	19526.5
Orc5	928.544	-0.309917	0.0277047	1033.36	1049.09	841.312	790.412	930.794	6367.11	2804.9	1543.75	2801.16
Rbp1	1136.36	0.295167	0.0278287	986.172	1027.74	1232.04	1299.49	3701.19	764.37	216.294	528.19	83578.8
Spata13	542.754	0.354704	0.0278287	466.19	462.921	635.029	606.876	4422.49	217.099	103.821	14475.1	1782.62
Daw1	14.9236	-0.350308	0.0278772	33.0297	19.4097	3.23582	4.01904	56.1897	5791.57	5428.11	12.3698	0
Fstl3	1251.77	0.296691	0.0278772	1072.99	1147.11	1459.35	1327.62	549.071	119.857	245.71	6.1849	3827.05
Zfp653	307.783	-0.421098	0.0279282	355.777	375.578	222.462	277.314	542.352	1916.58	1989.9	672.917	316.96
E2f6	1015.58	0.300289	0.0279504	914.451	881.2	1129.3	1137.39	3486.2	361.832	190.339	765.69	7898.99
Ncoa7	1062.94	0.297644	0.0280582	943.705	937.488	1156.8	1213.75	1925.11	299.642	1688.82	1079.88	1360.5
Tex40	22.5019	-0.402287	0.0280644	33.9734	38.8194	10.5164	6.69841	18.3227	49733.8	55596.2	89.0625	9.56027
4930451G09Rik	85.8966	-0.487633	0.0282582	107.582	119.37	55.0089	61.6253	73.2909	12413.1	12664.4	885.677	72.0697
Tomm70a	4492.33	-0.228698	0.0282582	4735.51	5004.79	4156.4	4072.63	15049.7	34670.3	37119.5	8323.64	13911.7
Senp1	950.952	-0.318541	0.0283284	998.44	1141.29	830.796	833.282	2041.15	10921.7	9496.17	4369.01	903.813
uc007gqp.1	315.266	-0.414306	0.0284308	404.85	342.581	252.394	261.238	133.756	480.558	299.351	0	0
Dmd	996.582	0.315611	0.02846	935.212	811.325	1113.12	1126.67	2701.99	278.158	332.228	4335.61	5068.42
Tesk1	1058.62	-0.320293	0.0286636	1089.04	1294.63	915.736	935.098	2135.21	59150.5	91831.5	3550.13	1503.17
Ccdc25	1554.35	0.278145	0.0287581	1370.26	1408.17	1643.79	1795.17	5425.36	1761.67	3775.63	4851.43	10664.1
Alas2	134.971	-0.473659	0.02897	159.486	181.481	101.119	97.7967	270.565	74.6278	190.339	163.281	34.5641
Wwtr1	1579.39	0.278423	0.0289949	1479.73	1346.06	1775.65	1716.13	19044	682.958	4109.59	1843.1	12683.5
Cep95	800.965	-0.351518	0.0290023	900.295	926.813	605.097	771.657	1257.55	20627.8	21966.8	6490.43	2429.04
Fgfr1op	2080.1	-0.252268	0.0294884	2254.51	2297.14	1890.53	1878.23	3795.25	15327	17057.8	4038.74	2740.86
Nmd3	2534.57	-0.253995	0.0294884	2648.98	2900.78	2295	2293.53	10092.8	12071.6	11211	2306.97	14208.8
Slc25a46	1308.22	0.285195	0.0294884	1193.79	1139.35	1495.76	1403.99	3116.08	2883.35	12546.8	2409.64	5460.39
Zbtb44	1353.49	-0.27832	0.0294884	1497.66	1496.49	1232.85	1186.96	3092.87	15929.6	14680.3	5248.5	2101.79
Utp20	3467.34	-0.23137	0.0296558	3824.84	3700.46	3178.38	3165.67	9215.11	3236.13	2242.54	4884.83	2902.65
Susd5	22.7405	-0.402834	0.0298883	37.7482	34.9375	8.89849	9.37777	48.2498	3331.11	465.465	45.7682	0
Them4	306.226	-0.408121	0.0302174	345.396	378.489	249.158	251.86	580.83	9975.25	3064.45	2512.31	1685.55
Phactr2	1679.57	0.264233	0.0303399	1537.3	1488.72	1866.26	1825.99	4032.83	834.475	584.859	2272.33	3551.27
Gpc2	448.227	-0.37538	0.030468	505.826	530.855	354.322	401.904	418.979	954.332	614.275	39.5833	331.668
Rpgr	755.317	-0.327916	0.0305316	817.249	888.964	635.838	679.218	2159.64	3233.87	26997	3519.21	1352.41
Agpat4	1023.13	0.310917	0.0305848	886.139	914.197	1223.14	1069.07	4378.52	123.249	147.08	12.3698	2846.75
Echdc1	1021.88	-0.317919	0.0305848	1060.72	1237.37	866.39	923.041	545.406	6217.85	1488.1	1820.83	1887.79
Sptlc2	1771.13	-0.260472	0.0308899	1936.48	1950.67	1570.99	1626.37	8518.84	2616.5	1522.71	4284.9	15270.7
Immp1l	406.763	-0.383764	0.0309685	494.502	451.275	323.582	357.695	189.335	1075.32	2344.63	308.008	555.967
1700074P13Rik	8.37123	-0.277217	0.0310187	16.9867	16.4982	0	0	0	21261	41391.8	64.3229	0
Abca8a	68.4874	-0.476492	0.0310892	84.9335	104.812	53.391	30.8127	87.949	120.988	212.833	2.47396	30.887
uc009jdo.1	26.868	-0.418964	0.0310892	40.5793	42.7013	12.1343	12.0571	3.05379	3069.92	3737.56	48.2422	12.5019
Srgap1	74.5606	-0.481474	0.0311981	104.751	95.1075	50.1551	48.2285	5915.79	361.832	2716.65	53.1901	2668.05
Hnrnph3	2000.81	-0.297643	0.0313602	2000.66	2460.18	1731.16	1811.25	2681.84	17595.2	9120.69	8536.4	3073.26
Wdr67	674.05	-0.339535	0.0313602	719.103	814.237	592.154	570.704	1935.49	5326.84	9487.52	1057.62	1497.29
Napepld	946.096	0.303717	0.0315267	822.911	847.233	1088.04	1026.2	313.318	7762.42	6038.93	1206.06	722.904
Slc23a2	863.824	0.32348	0.0319256	810.643	695.838	986.924	961.891	3171.66	171.87	164.383	2231.51	1217.83
Hnrpll	2200.28	-0.248828	0.0321526	2414.94	2395.16	2037.75	1953.26	6480.13	16594.5	10783.6	4631.25	4581.58
1700088E04Rik	67.3107	-0.476445	0.0324973	82.1024	101.901	47.7283	37.5111	103.829	5358.5	6045.85	144.727	63.2449
Eid1	5732.92	0.243139	0.0324973	5572.58	4857.28	6181.22	6320.62	9088.68	811.86	526.027	2076.89	25108.2
Cct3	5484.43	-0.253725	0.0325146	5770.76	6244.1	5323.72	4599.13	15750.2	60721	54165.2	8813.48	18138.8
Dnajb1	1246.66	-0.281982	0.032758	1348.55	1414	1126.87	1097.2	5106.54	44154.8	58702.2	2126.37	2356.24
Tspan17	1633.38	0.267829	0.0328644	1417.45	1519.78	1822.57	1773.74	125.205	78.02	119.394	173.177	1467.13
Atp1b1	5424.63	0.227794	0.0333601	4956.34	4987.32	6145.62	5609.25	17628.9	329.041	410.093	4642.38	5453.03
Rab5a	1474.25	0.27152	0.0333706	1362.71	1282.01	1613.86	1638.43	5946.94	737.232	968.997	3365.82	4366.84
Trafd1	537.743	-0.35213	0.0333706	611.521	621.11	482.945	435.396	2145.59	35441.4	32868	2518.49	1825.28
Dlat	1263.3	-0.283684	0.0336096	1354.22	1447.96	1151.14	1099.88	2291.56	11867	7925.01	2758.46	3440.96
Mxi1	4047.14	0.235048	0.0336096	3553.05	3840.21	4512.34	4282.96	2138.26	8804.95	10544.8	4173.57	2954.86
Tchh	132.768	0.472452	0.0336785	78.3275	112.576	151.274	188.895	692.599	254.413	686.95	1895.05	1740.7
Sun2	1256.54	0.280288	0.0337202	1133.39	1112.18	1426.19	1354.42	4413.94	1687.04	638.5	8444.86	2287.85
Tm2d2	976.04	-0.311623	0.033942	1025.81	1166.52	882.569	829.263	895.37	6490.36	5123.57	734.766	3545.39
Cct8	7203.22	-0.237876	0.0339483	7513.78	8166.63	6927.07	6205.4	22833.2	39313	26718.4	7236.33	27593.9
Hirip3	737.635	-0.349531	0.0340068	760.627	923.901	592.154	673.86	950.338	18860.5	16566.4	963.607	808.211
Scmh1	750.144	-0.321156	0.0340708	821.024	871.495	673.05	635.009	1967.86	9717.45	12261.3	3521.68	756.732
1700030J22Rik	195.574	-0.443476	0.0342018	221.771	255.237	143.185	162.101	176.509	10856.1	54099.5	183.073	44.1243
Lrrc49	633.814	-0.332644	0.0345489	703.061	734.657	558.987	538.552	583.273	8072.24	9338.71	494.792	524.344
Myof	596.104	0.339338	0.0346059	518.094	511.445	703.79	651.085	27557.4	42.9675	160.923	39128.1	21523.8
Lrrc71	22.1493	-0.392276	0.0350136	33.9734	36.8784	9.70745	8.03809	140.474	20840.4	8653.49	14.8438	17.6497
Mtch2	1806.03	-0.275354	0.0350256	1925.16	2069.07	1713.36	1516.52	3149.68	30072.8	46089.7	2784.44	8327
Pias2	2745.89	-0.24401	0.0350256	3071.76	2921.16	2580.56	2410.09	8049.17	93077.9	156766	10930	9525.71
Zswim8	2523.1	-0.246252	0.0352601	2710.32	2795.97	2206.83	2379.27	6754.36	7822.35	5467.91	13065	4512.45
Lrrc28	541.191	-0.34781	0.0355768	623.789	614.317	484.563	442.095	335.916	6352.41	19347.1	491.081	955.292
Mad2l1	1326.42	-0.273416	0.0356524	1450.48	1477.08	1169.75	1208.39	1222.74	1169.17	442.97	267.188	894.253
Chchd6	743.534	-0.323559	0.0358225	799.318	878.289	629.366	667.161	260.793	9065.02	13268.3	162.044	409.621
Esyt3	1791.98	0.265686	0.0365691	1659.03	1567.33	2057.98	1883.59	3550.33	482.819	2792.79	9072.01	2326.09
Usp26	1979.83	0.250063	0.0366678	1761.9	1828.39	2188.22	2140.81	2070.47	241.975	1574.62	0	0
Cul1	4496.03	-0.228157	0.0367337	4770.43	4981.5	4272.08	3960.1	15951.8	20693.4	24230.1	16855.1	28269.7
Rhbdd3	400.876	-0.371981	0.0367929	451.091	477.478	337.334	337.6	360.347	12480.9	12835.8	1996.49	822.183
uc009pao.1	188.419	0.439583	0.0369557	154.768	139.75	239.45	219.708	411.65	195.615	27.6856	7310.55	120.607
2610015P09Rik	510.238	-0.363882	0.0371745	536.968	638.579	416.611	448.793	853.228	9275.33	9449.45	4725.26	1341.38
Gm5918	293.884	-0.400922	0.0374173	335.959	357.138	234.597	247.841	172.234	11969.9	16787.9	598.698	241.948
Ireb2	5268.81	0.229166	0.0374281	4936.52	4713.64	5980.6	5444.47	8810.78	4155.41	20951.1	12228.8	6721.61
Nbeal1	1530.56	-0.269639	0.0375246	1743.02	1629.44	1336.39	1413.36	3852.05	940.763	631.579	9074.48	1144.29
Kifap3	942.564	-0.296399	0.0378244	1049.4	1053.95	855.064	811.847	1889.68	13878.5	62142.1	4409.83	5290.51
Pramel1	611.193	-0.339864	0.0383279	719.103	674.487	558.178	493.003	955.224	1024.44	1285.65	1.23698	0
Vamp3	2631.99	-0.236299	0.0385314	2813.19	2913.4	2438.19	2363.2	5368.56	7963.69	1998.56	2328	4836.76
1700034P13Rik	17.5499	-0.361882	0.0386401	29.2549	29.1145	6.47163	5.35873	3.66454	381.054	571.016	28.4505	19.856
Nid1	3429.53	0.226014	0.0386401	3072.7	3215.22	3713.91	3716.28	15534.6	135.687	385.869	9.89584	83344.2
Sclt1	607.995	-0.337846	0.0386824	651.157	731.745	522.584	526.495	1737.6	20736.4	80698.4	4660.94	1641.43
Mageb3	24.7092	-0.393705	0.0392297	44.3542	32.9965	8.08954	13.3968	6.10757	436.46	228.406	1.23698	4.41243
Ltv1	1739.5	-0.266879	0.0395972	1821.35	2007.93	1518.41	1610.3	8615.34	9195.05	11861.6	2819.08	14186
Nap1l1	1741.37	-0.266793	0.0396182	1875.14	1956.5	1482	1651.83	5451.62	8422.77	3786.01	1930.93	17906.4
Atp7a	2314.34	0.242956	0.040111	2145.04	2066.16	2587.84	2458.32	3448.34	186.57	171.305	6533.73	2985.75
Mllt6	1587.69	0.271435	0.0401675	1505.21	1341.21	1727.93	1776.42	4058.48	295.119	283.778	5455.08	2904.12
Nr0b1	2905.25	0.229758	0.0401675	2651.81	2663.98	3096.68	3208.54	147.803	127.772	164.383	0	11.7665
Gatm	23057.3	0.205311	0.0402659	21224.9	21443.8	25873.6	23686.9	10324.9	669.389	1405.05	248.633	14926.5
Trip12	9832.55	-0.197481	0.0402659	10621.4	10453.1	9121.76	9133.95	37284.3	145205	136089	42609	21391.5
Rec8	862.972	0.302054	0.0403686	735.146	787.063	969.127	960.552	244.303	2997.55	23283.6	3161.72	90.4549
Mir17hg	314.399	-0.395163	0.0403946	345.396	394.017	251.585	266.597	368.897	214.838	138.428	164.518	18.3851
Terf2ip	499.004	0.348183	0.0406319	430.33	425.072	591.345	549.269	2293.39	1040.27	517.375	2248.83	3085.76
Spg7	1397.86	-0.28871	0.0407291	1488.22	1615.86	1154.38	1332.98	3036.69	15144.9	13110.9	9602.67	6840.01
Prkacb	1890.03	0.257831	0.0407653	1668.47	1746.87	2160.72	1984.07	8603.13	450.028	408.363	6463.22	7982.09
Prr14	814.074	-0.316576	0.0408708	853.11	980.19	714.306	708.691	1379.7	4478.8	2420.76	3405.4	2029.72
Decr1	812.018	0.304839	0.0408985	713.441	717.188	931.915	885.529	629.691	1044.79	442.97	1525.2	4124.15
Hist1h2ba	50.502	-0.454087	0.0409082	67.9468	72.7864	29.1223	32.1524	1.22151	53.1441	117.664	0	0
U2af2	1618.79	-0.274584	0.0409082	1820.41	1752.7	1353.38	1548.67	5941.45	4194.99	1588.46	6325.91	5814.85
uc007kit.1	14.7343	-0.335225	0.0409082	19.8178	31.0555	4.04477	4.01904	0.610757	4084.18	2598.99	9.89584	2.94162
Lyst	1128.11	-0.295807	0.0409221	1345.72	1169.43	984.497	1012.8	2039.93	675.043	1848.02	3540.24	535.375
Mtap7d3	897.256	0.304649	0.0409221	795.544	782.211	948.903	1062.37	579.609	820.906	5706.7	4.94792	731.729
Arhgef33	134.334	-0.454369	0.0410287	170.811	164.982	93.0297	108.514	54.9682	2538.48	2071.23	257.292	37.5057
Poteg	7.88599	-0.261178	0.0411142	16.9867	14.5573	0	0	0	4734.34	6244.84	8.65886	0
Ppil6	46.1081	-0.439442	0.0414686	48.129	84.4322	25.0776	26.7936	186.281	1316.16	6211.96	38.3464	60.3033
Snx5	4555.37	0.214871	0.0418688	4110.78	4281.78	4878.8	4950.12	6075.81	1900.75	2799.71	13342.1	10459.7
Ppp1r9a	2397.9	0.258389	0.0419286	2310.19	2016.67	2577.33	2687.4	5087.61	993.907	591.78	4988.74	1531.11
Ostm1	627.979	0.323425	0.0421061	548.293	544.442	703.79	715.39	612.59	330.172	103.821	1985.35	5525.1
Slc35g1	1234.48	0.287669	0.0421381	1171.14	1023.86	1397.87	1345.04	1314.35	188.831	195.53	2528.39	339.022
Hdhd1a	7.8793	-0.259724	0.042167	17.9304	13.5868	0	0	0	6319.62	13540	13.6068	0
Mapk15	15.0292	-0.334792	0.0425256	31.1423	20.3802	3.23582	5.35873	273.619	6574.03	1751.12	77.9297	0
Igf2	719.249	0.314575	0.0428841	609.634	648.284	791.157	827.923	5283.66	280.42	247.44	1.23698	249.302
Smg1	5330.1	-0.247752	0.0428841	6251.1	5394.92	4630.45	5043.9	12911.4	18599.3	13829	17857	2421.69
Amn1	479.208	-0.353575	0.0432174	522.813	578.409	423.083	392.527	451.96	12720.7	16023.1	931.446	516.99
Spata24	245.524	-0.416765	0.0432364	284.055	302.791	175.543	219.708	143.528	16853.5	43277.8	431.706	541.994
Ankrd54	756.868	-0.311991	0.0436771	812.53	888.964	668.196	657.784	1267.32	58867.8	24636.8	2100.39	2037.81
Ldha	855.657	-0.298774	0.0436771	971.073	941.37	773.36	736.825	5229.3	61263.8	56234.7	5380.86	40995.9
Anapc15	531.023	-0.358661	0.043732	589.816	629.845	402.05	502.381	1207.47	3093.66	1713.05	1517.77	10478.8
Ces2g	437.888	0.363343	0.0438132	355.777	386.253	537.954	471.568	96.4996	12.438	58.832	12.3698	572.146
Epcam	1307.98	-0.270731	0.0439802	1412.73	1475.14	1205.34	1138.73	27217.2	4962.75	6696.46	30374	339.022
Abi1	4577.97	0.217748	0.0442763	4279.7	4145.91	5091.56	4794.72	8935.99	1195.18	764.816	5580.01	12974
Ccdc163	310.196	-0.395264	0.0442763	346.34	383.341	233.788	277.314	179.563	6088.95	4801.73	435.417	255.921
Tmem66	2818.69	-0.256028	0.0442763	2884.91	3299.65	2645.28	2444.92	10504.4	18584.6	19177.5	25271.5	34053
Nr2c2	953.842	-0.297575	0.0442875	1109.8	1018.04	811.381	876.152	2983.55	6621.52	3144.05	4147.59	861.16
Rangrf	48.6056	-0.447629	0.0442875	69.8342	65.993	29.1223	29.473	25.041	2290.85	2311.75	38.3464	19.1205
Catsperg1	87.2338	-0.461237	0.0445628	103.808	124.222	52.582	68.3238	53.7466	20881.1	15654.5	1209.77	15.4435
Rps28	336.155	-0.385495	0.0445628	400.131	385.282	256.438	302.768	318.815	412.714	496.611	126.172	783.942
Zfa-ps	34.5014	-0.418997	0.0449847	49.0727	52.4062	13.7522	22.7746	87.949	2017.21	576.207	39.5833	20.5914
Casp6	1287.73	0.275606	0.045479	1180.58	1124.79	1488.47	1357.1	717.64	143.602	321.845	1034.11	3311.53
Rnf144a	2091.61	0.246562	0.045479	1959.13	1839.07	2344.35	2223.87	698.706	175.262	750.973	7.42188	200.03
Trpc4ap	2602.02	-0.243035	0.0457013	2764.11	2916.31	2472.97	2254.68	5197.54	15805.3	9279.88	9836.46	4584.52
Diap2	1873.56	0.247067	0.0457291	1735.47	1663.41	2013.49	2081.86	2904.15	225.014	190.339	4579.3	2466.55
12-qE-23911	96.0667	-0.253146	0.0460913	177.417	202.831	0	4.01904	0.610757	25226.5	3057.53	8.65886	8.82487
Dnali1	20.8841	-0.369299	0.0464661	28.3112	38.8194	9.70745	6.69841	111.769	19473.3	25782.2	86.5886	43.3889
E130102H24Rik	156.557	0.442899	0.0465311	123.625	113.547	170.689	218.368	41.5315	22.6145	1.73035	916.602	100.015
Hat1	4299.38	-0.214651	0.0465311	4529.79	4747.61	3992.19	3927.95	7712.64	4313.71	12380.7	3212.44	5622.18
Tmx3	2442.08	0.234685	0.0466605	2243.19	2216.59	2726.98	2581.57	3736	1341.04	1192.21	4630.01	7205.5
1700007L15Rik	70.174	-0.457028	0.0467983	89.652	98.019	50.1551	42.8698	26.8733	1752.62	1346.21	89.0625	107.369
Gmfb	3554.18	-0.217115	0.0470509	3792.75	3883.88	3290.02	3250.07	11763.2	22238	19404.2	13405.1	13919
Mettl9	1177.83	0.285348	0.0471391	1103.19	993.776	1363.09	1251.26	3061.73	624.16	1633.45	2394.79	8591.01
Gm16432	15.5905	-0.3385	0.0471948	24.5363	28.1441	5.66268	4.01904	5.49682	938.501	280.317	137.305	7.35406
Lekr1	137.145	-0.455293	0.0475632	161.374	192.156	125.388	69.6634	241.86	8371.88	15955.6	1068.75	796.444
Tm7sf3	1988.08	0.245911	0.0477392	1837.39	1774.05	2241.61	2099.28	1044.39	424.022	605.623	1676.11	3439.49
3-qA2-617	29.9292	-0.39578	0.0477601	51.9038	38.8194	8.89849	20.0952	0	8172.88	1465.61	17.3177	1.47081
Capn6	2850.82	0.23614	0.0477601	2658.42	2544.61	3234.2	2966.05	3946.1	87.0658	89.9783	0	700.842
Ccni	1593.25	-0.273724	0.0477601	1804.36	1720.67	1529.73	1318.25	7337.03	19476.7	20175.9	6736.59	8709.41
Psmd2	4954.94	-0.212308	0.0477601	5182.83	5499.74	4599.71	4537.5	13124.6	35949.1	35489.5	11226.8	21506.9
Peg10	3820.51	0.221719	0.0477827	3637.04	3379.23	4159.64	4106.12	9160.14	485.081	654.073	40.8203	25176.6
4930549G23Rik	15.2984	-0.333903	0.0479802	21.7052	30.085	4.04477	5.35873	1.83227	2913.88	5073.39	4.94792	0
Rassf2	1309.13	0.285187	0.0485931	1230.59	1100.53	1540.25	1365.14	721.304	124.38	198.99	220.182	162.525
Arhgap12	2372.21	0.232683	0.0486177	2208.27	2126.33	2600.79	2553.43	4858.57	1242.67	6564.96	8637.83	3679.97
Bet1	974.666	-0.303115	0.0486177	1068.27	1118	928.679	783.714	408.597	1092.28	1937.99	748.373	1570.09
Lrrc23	10.2111	-0.280619	0.0486177	14.1556	24.2621	2.42686	0	1021.19	35271.8	29068.2	47.0052	1.47081
Tmem47	748.614	0.304017	0.0486177	674.749	642.461	837.267	839.98	2204.83	211.446	48.4499	3.71094	1070.02
Lrrc73	24.0911	-0.384742	0.0487007	38.6919	35.9079	9.70745	12.0571	89.7813	3126.45	7663.73	29.6875	315.489
Ptk2	3080.19	-0.220023	0.0492233	3304.86	3354.97	2816.78	2844.14	9354.36	4504.81	6866.04	7726.17	6604.68
Smarca5-ps	177.098	-0.429428	0.0492233	221.771	211.566	150.465	124.59	570.447	833.344	785.58	578.906	696.429
Izumo4	67.6203	-0.452256	0.04953	94.3705	86.3731	38.8298	50.9079	42.753	8144.61	7400.72	2058.33	537.581
Suco	4129.78	-0.223783	0.0496979	4354.26	4592.33	3937.99	3634.56	10330.3	32386.2	36313.2	16594.1	4792.64
Dhx40	3551.06	-0.225925	0.0498038	3707.82	3990.63	3332.08	3173.71	5590.26	26215.8	33714.2	4393.75	12483.5

## Sheet: P14 - all transcripts
Figure 6 - Source Data 1. DESEQ2 results for P12 Ythdc2-/- testes compared to wild type.
Gene ID	baseMean	log2FoldChange	padj
0610005C13Rik	4.98172	0.0256445	NA
0610007N19Rik	45.0255	0.0696174	0.955561
0610007P14Rik	1032.11	0.129061	0.659112
0610009B14Rik	0.577542	0.00160495	NA
0610009B22Rik	768.526	0.0748791	0.898669
0610009D07Rik	1800.18	0.0027345	0.999068
0610009L18Rik	43.7228	-0.110244	0.895859
0610009O20Rik	652.515	-0.0428214	0.964602
0610010F05Rik	1138.5	0.0349373	0.969848
0610010K14Rik	1143.04	-0.0323359	0.972334
0610011F06Rik	215.196	0.108641	0.892068
0610012G03Rik	446.509	-0.0526557	0.961174
0610012H03Rik	1.6628	0.00925032	NA
0610030E20Rik	597.136	-0.0473261	0.961174
0610031J06Rik	447.476	-0.0311148	0.982253
0610031O16Rik	0.404477	0.0124042	NA
0610037L13Rik	576.642	-0.309997	0.0697776
0610038B21Rik	16.6848	-0.0334961	0.977781
0610039K10Rik	5.17024	-0.0556497	0.898236
0610040B10Rik	60.4143	-0.359277	0.174368
0610040J01Rik	6.84458	0.00546035	0.996789
0610043K17Rik	11.8333	0.0231349	0.98422
1-qC1.3-637	85.1083	-0.837298	3.35136e-06
1-qD-2017	46.457	-0.0913307	0.472578
1-qD-4525	12.4286	-0.388391	0.0044794
1-qE2.3-2	5.2195	-0.0323935	0.961066
1-qE3-706	6.22781	-0.207729	0.0978825
10-qA3-143	87.9875	-0.773444	2.61336e-05
10-qA3-2592	81.8113	-1.82399	6.55984e-30
10-qB4-6488	96.4842	-1.27965	1.85811e-14
10-qB5.1-221	14.2939	-0.3831	0.0109834
10-qB5.1-5404	26.2915	-0.731946	1.21759e-06
10-qC1-117	66.772	-1.53982	9.84942e-22
10-qC1-12816	104.16	-0.883412	5.95811e-07
10-qC1-1527	5.30292	-0.0514042	0.911792
10-qC1-2617	13.4713	-0.404083	0.00429908
10-qC1-875	6.39026	-0.111888	0.642082
11-qB1.3-590	6.63691	-0.126525	0.529336
11-qE1-252	32.69	-0.668419	4.29052e-05
11-qE1-3997	52.2152	-1.34053	2.03552e-17
11-qE1-9443	74.146	-1.43363	8.78431e-19
1110001A16Rik	296.969	-0.13853	0.794722
1110001J03Rik	206.835	0.0372814	0.980092
1110002L01Rik	320.619	-0.0322888	0.983246
1110004E09Rik	719.05	-0.206488	0.651415
1110004F10Rik	1248.39	-0.211033	0.209401
1110006O24Rik	33.5612	-0.104868	0.896128
1110007C09Rik	257.085	0.0581051	0.961174
1110008F13Rik	1074.48	0.163015	0.457449
1110008J03Rik	171.563	-0.0859426	0.937026
1110008L16Rik	414.302	0.0606178	0.948587
1110008P14Rik	421.262	-0.162282	0.647758
1110012L19Rik	238.418	-0.00547338	0.998233
1110017D15Rik	5.24856	-0.118257	0.527528
1110018G07Rik	1050.8	-0.0534828	0.944026
1110020A21Rik	14.8988	0.0582448	0.945822
1110028F11Rik	0.485242	-0.0130512	NA
1110032A03Rik	431.169	-0.101676	0.887528
1110032F04Rik	20.2978	0.0115467	0.995419
1110034G24Rik	104.84	-0.145348	0.83312
1110035M17Rik	3.08299	0.0265424	NA
1110036E04Rik	0.773085	0.0111477	NA
1110037F02Rik	2663.51	-0.0441506	0.943197
1110038B12Rik	2.93267	0.0564815	NA
1110038F14Rik	314.122	-0.095296	0.900702
1110046J04Rik	41.0139	0.0227568	0.990759
1110051M20Rik	308.931	-0.351413	0.0957172
1110054M08Rik	39.575	-0.00945279	0.996789
1110057K04Rik	500.176	-0.0548991	0.955734
1110058L19Rik	543.139	0.0130438	0.994891
1110059E24Rik	697.504	0.132336	0.700803
1110059G10Rik	820.053	-0.0167346	0.990171
1110059M19Rik	0.537159	0.0184381	NA
1110065P20Rik	646.123	0.0082878	0.995866
1190002N15Rik	1104.26	0.120301	0.699401
1190003J15Rik	4.02244	0.0240718	NA
1190005I06Rik	16.0163	-0.0851817	0.895193
1190007I07Rik	160.007	-0.102666	0.910114
12-qE-23911	96.0667	-0.253146	0.0460913
12-qE-7089	47.2248	-1.03466	4.45465e-11
1200011I18Rik	851.254	0.13222	0.663778
1200014J11Rik	1181.37	0.0760919	0.874416
13-qA3.1-213	30.8613	-0.39593	0.0600508
13-qA3.1-355	2.20873	-0.043414	NA
13-qA5-156	69.5202	-0.115989	0.893107
13-qA5-208	25.1855	-0.348226	0.100077
13-qA5-464	70.1131	-0.40735	0.0965822
13-qA5-703	64.5433	-0.959917	2.16321e-08
13-qA5-967	3.10721	-0.104954	NA
13-qB1-1517	144.936	-1.97509	8.36787e-35
1300002E11Rik	2.40672	-0.00187433	NA
1300002K09Rik	7.01971	-0.0723352	0.866071
1300015D01Rik	37.3968	0.0712151	0.949771
1300017J02Rik	30.1334	-0.378617	0.0781305
1300018J18Rik	282.78	-0.122717	0.839454
14-qA3-19970	118.465	-2.03289	1.04013e-36
14-qA3-2286	2.8376	-0.0856222	NA
14-qA3-284	53.3863	-1.32822	7.62935e-17
14-qA3-3095	87.8951	-1.8284	6.55984e-30
14-qC1-1010	5.85495	-0.174338	0.199687
14-qC1-1261	12.4355	-0.40294	0.00265809
15-qD1-17920	80.1669	-1.68744	1.42483e-25
15-qD1-4001	49.6053	-0.902698	8.46494e-08
15-qD3-14639	79.7156	-1.42845	2.32445e-18
15-qE1-1119	5.48263	-0.0701888	0.839907
15-qE1-8387	37.6336	-0.68683	6.09061e-05
1500002O10Rik	4.03524	-0.0580628	NA
1500004A13Rik	6.90308	-0.0572985	0.907812
1500009L16Rik	1382.37	0.181737	0.383258
1500011B03Rik	613.573	0.0334828	0.975595
1500011K16Rik	448.199	0.121243	0.804224
1500012F01Rik	505.066	0.0772105	0.915875
1500015A07Rik	250.075	-0.0697874	0.94825
1500015O10Rik	39.6775	-0.0615345	0.961174
1500016L03Rik	1.7618	0.0280589	NA
1500017E21Rik	3.98413	-0.0272989	NA
1500032L24Rik	808.313	-0.168443	0.495448
1600002H07Rik	325.053	0.131399	0.818991
1600002K03Rik	123.905	-0.0650529	0.961174
1600010M07Rik	1.05609	-0.0151506	NA
1600012H06Rik	1655.37	0.171081	0.308082
1600014C10Rik	243.755	0.152208	0.771974
1600014C23Rik	3.25605	0.0132507	NA
1600014K23Rik	2.91651	-0.0672976	NA
1600016N20Rik	131.721	-0.694833	0.000172634
1600019K03Rik	0.471853	-0.0126354	NA
1600023N17Rik	42.5968	-0.162712	0.774662
1600029D21Rik	5.61813	0.0549533	0.899753
1600029I14Rik	0.44486	9.11659e-05	NA
1600029O15Rik	5.67186	0.0314751	0.964374
17-qA3.3-26735	501.475	-3.83054	4.75751e-150
17-qA3.3-27363	183.44	-2.58876	1.02449e-60
17-qA3.3-352	83.292	-1.78739	1.23702e-28
17-qC-59	1.92758	-0.0633014	NA
17-qE1.1-7037	26.2884	-0.673067	8.27968e-06
1700001C02Rik	0.714474	-0.0244123	NA
1700001C19Rik	12.9859	-0.000448572	0.999417
1700001G11Rik	15.665	-0.270728	0.163867
1700001G17Rik	11.3294	-0.0996091	0.825558
1700001J03Rik	1.95516	-0.000439674	NA
1700001J11Rik	2.30528	-0.0502766	NA
1700001L05Rik	2.55034	-0.0311935	NA
1700001L19Rik	9.87347	-0.0390326	0.966009
1700001O22Rik	6.92567	0.0593031	0.907812
1700001P01Rik	3.90766	-0.0169739	NA
1700003D09Rik	0.721169	-0.0245996	NA
1700003E16Rik	48.2438	-0.801051	3.29393e-06
1700003F12Rik	3.24909	0.0148609	NA
1700003G18Rik	13.0715	-0.349364	0.0189269
1700003H04Rik	1.19302	-0.0405366	NA
1700003M02Rik	59.6951	-0.989259	5.30037e-09
1700003M07Rik	14.2464	0.0256417	0.98422
1700006A11Rik	143.819	-2.43572	8.6212e-53
1700006H21Rik	1.0224	0.00161155	NA
1700007B14Rik	4.82497	0.0481487	NA
1700007F19Rik	0.478548	-0.0150979	NA
1700007G11Rik	11.504	-0.248657	0.149792
1700007J10Rik	0.44486	9.11659e-05	NA
1700007K09Rik	0.640403	0.00647681	NA
1700007K13Rik	17.2464	0.0332749	0.978072
1700007L15Rik	70.174	-0.457028	0.0467983
1700008I05Rik	4.86083	0.0708574	NA
1700008J07Rik	145.918	-0.336064	0.207882
1700008K24Rik	17.7531	-0.542073	0.000104563
1700008O03Rik	12.3834	-0.0501017	0.955951
1700009P17Rik	61.408	-0.114512	0.893081
1700010B08Rik	13.6265	-0.38097	0.00998653
1700010D01Rik	2.19778	-0.0085111	NA
1700010I14Rik	148.046	-1.10413	4.41515e-11
1700011E24Rik	12.4487	-0.379061	0.00534671
1700011I03Rik	20.422	-0.587487	3.19778e-05
1700011J10Rik	172.392	0.00963719	0.996789
1700011M02Rik	1768.92	-0.0157407	0.994891
1700012B07Rik	22.6672	-0.123628	0.824321
1700012B09Rik	19.4245	-0.552639	9.86394e-05
1700012B15Rik	139.33	-0.130531	0.85868
1700012D01Rik	36.0888	-0.201742	0.614206
1700012D14Rik	39.5425	-0.161887	0.771341
1700012I11Rik	0.570847	0.00173947	NA
1700012P22Rik	0.471853	-0.0126354	NA
1700013F07Rik	3.62891	-0.0243554	NA
1700013G23Rik	36.8476	-0.313413	0.229543
1700013H16Rik	1796.35	0.238407	0.0695141
1700015F17Rik	7.40204	0.00811364	0.995419
1700016G22Rik	1.35063	0.0141519	NA
1700016H13Rik	1.71472	0.0459073	NA
1700016K19Rik	95.4718	-0.176187	0.76027
1700016L04Rik	9.32717	-0.0842275	0.855202
1700017B05Rik	1186.24	0.0588846	0.922779
1700017D01Rik	3.67115	-0.0896416	NA
1700017N19Rik	1.86711	-0.0513295	NA
1700018A04Rik	0.721169	-0.0245996	NA
1700018B08Rik	13.8704	-0.137922	0.704596
1700018B24Rik	332.244	-0.269575	0.261501
1700018F24Rik	2.39274	-0.0810125	NA
1700018G05Rik	959.488	0.0981252	0.826176
1700018L02Rik	7.21319	0.000411767	0.999417
1700019A02Rik	104.228	-1.63136	1.53427e-23
1700019B03Rik	5.76416	0.0493641	0.924677
1700019B21Rik	303.695	0.177373	0.659516
1700019D03Rik	2.25129	-0.0191756	NA
1700019E08Rik	9.53855	-0.0496278	0.948216
1700019G17Rik	162.598	0.122621	0.872972
1700019G24Rik	2.11643	-0.0609269	NA
1700019L03Rik	1.57051	-0.0107079	NA
1700019N19Rik	0.471853	-0.0126354	NA
1700020D05Rik	18.9182	-0.0196079	0.990637
1700020I14Rik	0.570847	0.00173947	NA
1700020L24Rik	2.0718	-0.0137018	NA
1700020M21Rik	1.69649	-0.00825888	NA
1700020N01Rik	418.016	-1.46423	1.659e-19
1700020N15Rik	0.669841	0.0190668	NA
1700021F05Rik	375.895	-0.112479	0.845035
1700021F07Rik	4.40385	-0.0652835	NA
1700021K19Rik	771.53	0.137319	0.653122
1700021N21Rik	4.41842	0.0924237	NA
1700022E09Rik	0.570847	0.00173947	NA
1700023A16Rik	17.1584	0.000114216	0.999717
1700023E05Rik	3.08022	-0.093556	NA
1700023F02Rik	0.923407	-0.0185878	NA
1700023F06Rik	7.32552	0.00835773	0.994891
1700023L04Rik	15.478	0.0204117	0.989518
1700024F13Rik	8.84231	0.0240903	0.981869
1700024P16Rik	758.478	0.0806669	0.888445
1700025E21Rik	42.7789	-0.735308	2.0444e-05
1700025F24Rik	4.44907	-0.0303994	NA
1700025G04Rik	695.186	0.140258	0.653122
1700025M24Rik	0.478548	-0.0150979	NA
1700026D08Rik	79.6234	0.064637	0.962116
1700026D11Rik	3.13399	-0.100245	NA
1700026L06Rik	13.9071	-0.0480416	0.961174
1700028B04Rik	5.58625	0.0124095	0.990759
1700028D13Rik	0.537159	0.0184381	NA
1700028E10Rik	53.7773	-0.224274	0.57373
1700028I16Rik	24.338	-0.0787358	0.933454
1700028J19Rik	32.1391	-0.466799	0.0162408
1700028K03Rik	114.804	-0.644095	0.000855477
1700028P14Rik	0.687481	-0.00886028	NA
1700028P15Rik	2.51421	-0.0428819	NA
1700029F12Rik	3.81292	-0.0691741	NA
1700029H14Rik	1.01571	0.00195237	NA
1700029I15Rik	14.1215	-0.188545	0.436956
1700029J03Rik	0.537159	0.0184381	NA
1700029J07Rik	195.155	-0.670001	0.00011411
1700029M20Rik	6.47713	-0.213686	0.0893871
1700029P11Rik	110.27	-0.950267	5.478e-08
1700030A11Rik	0.478548	-0.0150979	NA
1700030C10Rik	100.767	-0.0959963	0.928102
1700030F18Rik	1.20641	-0.039684	NA
1700030J22Rik	195.574	-0.443476	0.0342018
1700030K09Rik	287.373	-0.106264	0.88097
1700030M09Rik	0.714474	-0.0244123	NA
1700030O20Rik	1.40195	-0.035761	NA
1700031F05Rik	23.8181	0.232273	0.415377
1700031M16Rik	1.21125	0.00973876	NA
1700034F02Rik	43.8145	-0.42439	0.0574681
1700034H15Rik	47.9732	-0.00888064	0.997057
1700034I23Rik	1.39526	-0.0355866	NA
1700034J05Rik	7.22508	-0.221992	0.0780892
1700034O15Rik	1.17756	0.0266267	NA
1700034P13Rik	17.5499	-0.361882	0.0386401
1700036G14Rik	0.478548	-0.0150979	NA
1700037C18Rik	42.0342	-0.26905	0.386926
1700037H04Rik	649.924	-0.271183	0.181058
1700039E15Rik	2.59498	-0.0774482	NA
1700040L02Rik	199.964	-0.504283	0.0103892
1700042G15Rik	0.957095	-0.0327096	NA
1700042O10Rik	1.65611	0.00944045	NA
1700045H11Rik	1.44234	-0.0484809	NA
1700045I19Rik	675.795	0.17878	0.47704
1700046C09Rik	3.59915	-0.120432	NA
1700047E10Rik	1.5975	-0.0271193	NA
1700047G03Rik	0.970485	-0.027552	NA
1700047M11Rik	1.9728	-0.0348519	NA
1700048O20Rik	362.974	-0.257368	0.280809
1700049E22Rik	0.478548	-0.0150979	NA
1700049G17Rik	188.095	-0.133465	0.84088
1700049L16Rik	1.40195	-0.035761	NA
1700051A21Rik	1.20641	-0.039684	NA
1700052I22Rik	0.404477	0.0124042	NA
1700052K11Rik	244.058	0.0308376	0.98422
1700052N19Rik	802.956	-0.885984	1.20091e-13
1700056E22Rik	6.20232	0.0475412	0.934004
1700057G04Rik	7.28944	0.00454706	0.997062
1700058G18Rik	1.66487	-0.0555127	NA
1700060C20Rik	1.10801	0.0226174	NA
1700061G19Rik	6.72736	-0.0644834	0.892068
1700063D05Rik	0.647098	0.00630127	NA
1700063O14Rik	0.923407	-0.0185878	NA
1700064M15Rik	15.1533	-0.182178	0.509825
1700065D16Rik	11.6255	-0.113907	0.775354
1700066B17Rik	0.773085	0.0111477	NA
1700066B19Rik	6.62651	-0.0298762	0.969372
1700066M21Rik	623.969	0.0219551	0.985925
1700066O22Rik	0.721169	-0.0245996	NA
1700067G17Rik	3.32284	-0.101255	NA
1700067K01Rik	40.4731	0.0863532	0.935714
1700073E17Rik	6.86467	0.0046938	0.997057
1700074P13Rik	8.37123	-0.277217	0.0310187
1700080O16Rik	122.697	-0.345651	0.204579
1700081H04Rik	0.438165	0.000258372	NA
1700084C01Rik	3.09845	-0.0438488	NA
1700084E18Rik	17.8048	-0.153835	0.683608
1700084J12Rik	9.64365	-0.106857	0.771974
1700086L19Rik	3.88917	-0.0575348	NA
1700086O06Rik	96.4821	0.123868	0.88097
1700088E04Rik	67.3107	-0.476445	0.0324973
1700092C10Rik	0.537159	0.0184381	NA
1700092K14Rik	1.25833	-0.00765918	NA
1700092M07Rik	5.9792	-0.0238603	0.976626
1700093K21Rik	9.47808	-0.0329084	0.973326
1700094D03Rik	101.115	0.037051	0.983246
1700094J05Rik	0.485242	-0.0130512	NA
1700095A21Rik	1.73688	-0.0259617	NA
1700095B22Rik	25.8662	-0.102323	0.888185
1700096K18Rik	115.458	-0.0119123	0.995866
1700097N02Rik	13.1128	-0.211187	0.33469
1700101E01Rik	14.6884	-0.0859123	0.892068
1700101I11Rik	20.3088	-0.00526101	0.997947
1700102H20Rik	28.2777	-0.211974	0.527823
1700102P08Rik	383.16	-3.02605	1.10692e-92
1700105P06Rik	7.74817	-0.0160481	0.988514
1700106J16Rik	0.485242	-0.0130512	NA
1700108F19Rik	14.2667	0.0120851	0.994891
1700108J01Rik	5.49325	-0.183586	0.13956
1700109F18Rik	7.90226	-0.0488284	0.941416
1700109G14Rik	2.46958	0.00295932	NA
1700109H08Rik	13.0694	0.0659769	0.92983
1700110C19Rik	3.17736	-0.0228027	NA
1700110K17Rik	0.714474	-0.0244123	NA
1700111N16Rik	0.910017	-0.0158613	NA
1700112E06Rik	7.76592	0.0515931	0.937778
1700112H15Rik	16.3209	0.0327673	0.976811
1700113A16Rik	70.2182	-0.141895	0.841603
1700113H08Rik	5.10313	-0.0237258	0.9725
1700120C14Rik	14.6166	-0.0190544	0.989518
1700120E14Rik	1.04488	0.0196665	NA
1700123I01Rik	225.116	-0.615259	0.000590167
1700123L14Rik	10.7604	-0.151853	0.561116
1700123M08Rik	41.2989	0.0413344	0.97846
1700123O20Rik	670.419	0.00544486	0.997062
1700125G22Rik	4.59515	-0.0258311	NA
1700125H20Rik	48.2354	-0.703303	9.92581e-05
1700128A07Rik	0.640403	0.00647681	NA
1700129C05Rik	2.62866	-0.0888796	NA
18-qE1-1295	18.8993	-0.590533	3.07288e-05
18-qE1-36451	27.2193	-0.662523	2.65768e-05
1810006J02Rik	1.54617	0.0209137	NA
1810008I18Rik	0.680786	-0.0098401	NA
1810009A15Rik	620.479	-0.0883461	0.892211
1810010D01Rik	1.25163	-0.0074754	NA
1810010H24Rik	28.4393	0.0522092	0.968522
1810011H11Rik	0.923407	-0.0185878	NA
1810011O10Rik	44.9164	0.0571466	0.968522
1810012K16Rik	1.78879	0.0131419	NA
1810013D10Rik	489.225	0.03412	0.977466
1810013L24Rik	2362.12	-0.179503	0.247233
1810014B01Rik	90.0305	-0.100845	0.919999
1810019D21Rik	11.1965	-0.0869651	0.866071
1810019J16Rik	96.1336	-0.264699	0.44494
1810020O05Rik	2.98399	0.00624786	NA
1810021B22Rik	12.7846	-0.220475	0.286529
1810022K09Rik	313.375	0.0439411	0.973349
1810024B03Rik	20.1644	0.116995	0.828071
1810026B05Rik	649.929	0.056393	0.948425
1810026J23Rik	1205.79	-0.133031	0.586378
1810030O07Rik	496.103	0.239045	0.27211
1810032O08Rik	136.846	0.0257191	0.989518
1810033B17Rik	1.18426	0.0264412	NA
1810034E14Rik	59.2242	0.035897	0.984021
1810037I17Rik	1347.62	0.0387516	0.961174
1810041L15Rik	14.1182	-0.0176885	0.990693
1810043G02Rik	202.83	-0.221742	0.536513
1810043H04Rik	426.093	-0.0845559	0.907812
1810044D09Rik	88.2605	-0.166249	0.786642
1810046K07Rik	1.10801	0.0226174	NA
1810053B23Rik	1.93242	-0.0172339	NA
1810055G02Rik	609.968	-0.15529	0.605618
1810058I24Rik	2122.21	0.168524	0.308959
1810062G17Rik	17.3411	-0.00213058	0.999417
1810062O18Rik	30.1471	-0.311173	0.208111
1810064F22Rik	31.4042	0.189716	0.636958
19-qC2-1361	2.72766	-0.073206	NA
2-qE1-35981	59.3543	-1.03893	4.02906e-10
2-qE5-4	368.342	0.0780521	0.933454
2-qF1-2536	43.1362	-1.15117	1.29832e-13
2-qG3-1029	21.7099	-0.637924	1.37348e-05
2010001M06Rik	5.23555	-0.0194563	0.981182
2010002M12Rik	3.63561	-0.0245168	NA
2010003K11Rik	4.55232	-0.0418561	NA
2010003O02Rik	121.342	-0.03034	0.987001
2010005H15Rik	1.67157	-0.0566545	NA
2010012O05Rik	309.662	0.0694732	0.944026
2010015L04Rik	61.6061	-0.300164	0.327194
2010107E04Rik	3047.11	-0.0943028	0.702828
2010107G12Rik	7.89578	-0.0623196	0.902398
2010107G23Rik	349.38	0.156907	0.701963
2010109A12Rik	8.30297	-0.0289574	0.974994
2010109I03Rik	0.478548	-0.0150979	NA
2010111I01Rik	123.792	-0.0646324	0.961174
2010204K13Rik	38.6173	0.106008	0.898669
2010300C02Rik	106.306	0.0505225	0.974012
2010310C07Rik	0.404477	0.0124042	NA
2010320M18Rik	263.473	0.147807	0.784077
2200002D01Rik	11.0944	0.0755029	0.895237
2200002J24Rik	68.0038	0.101585	0.918296
2210013O21Rik	435.793	0.11781	0.816702
2210015D19Rik	175.699	-0.22242	0.547128
2210016F16Rik	895.218	0.00610572	0.99689
2210016L21Rik	449.175	0.12961	0.786642
2210018M11Rik	985.188	-0.133007	0.625417
2210019I11Rik	0.916712	-0.018406	NA
2210039B01Rik	2.62659	-0.0262203	NA
2210404J11Rik	158.729	-0.0193468	0.994276
2210404O07Rik	108.336	-1.09007	1.60672e-10
2210404O09Rik	112.79	-0.0642948	0.962103
2210408F21Rik	17.9589	0.0786273	0.919673
2210408I21Rik	233.83	-0.23353	0.453139
2210409E12Rik	1.14169	0.00494021	NA
2210416O15Rik	3.2721	0.0284809	NA
2210417A02Rik	4.18212	0.0104073	NA
2210417K05Rik	9.11218	-0.00431306	0.997274
2300002M23Rik	0.669841	0.0190668	NA
2300005B03Rik	0.982018	0.0189047	NA
2300009A05Rik	255.654	-0.0345647	0.981839
2310001H17Rik	8.59458	-0.0118144	0.99428
2310001K24Rik	1.3798	0.0338435	NA
2310002D06Rik	0.674091	-0.00851858	NA
2310002F09Rik	0.537159	0.0184381	NA
2310002J15Rik	7.82442	-0.0127871	0.992508
2310002L09Rik	0.404477	0.0124042	NA
2310003H01Rik	293.043	0.0224687	0.989518
2310005G13Rik	16.85	-0.189004	0.5019
2310008H04Rik	756.173	-0.157511	0.563737
2310008H09Rik	1766.11	0.0780195	0.863535
2310009A05Rik	287.694	0.0645315	0.955561
2310009B15Rik	150.025	0.0494359	0.973791
2310010J17Rik	217.083	-0.0602912	0.961174
2310010M20Rik	0.438165	0.000258372	NA
2310011J03Rik	540.432	0.0523344	0.958866
2310014F07Rik	1.39101	-0.00344087	NA
2310014L17Rik	14.9775	0.0907254	0.882267
2310015A10Rik	167.325	0.0589647	0.965867
2310015B20Rik	3.16131	-0.0347545	NA
2310022A10Rik	329.205	-0.0961848	0.893081
2310022B05Rik	994.304	0.0476593	0.949929
2310030A07Rik	2.17504	-0.0263536	NA
2310030G06Rik	63.3162	-0.0739199	0.953416
2310033P09Rik	558.659	-0.038092	0.974994
2310034G01Rik	20.0928	-0.0860493	0.910288
2310035C23Rik	2306.65	0.0020053	0.999302
2310036O22Rik	1233.26	-0.0113167	0.994891
2310039H08Rik	273.614	0.0313033	0.984021
2310039L15Rik	8.04212	-0.0701549	0.888445
2310040G24Rik	1.21794	0.0106187	NA
2310042D19Rik	0.773085	0.0111477	NA
2310044G17Rik	1022.99	0.00391287	0.998881
2310045N01Rik	180.663	0.0797649	0.943635
2310047M10Rik	294.423	-0.0277708	0.985925
2310050B05Rik	6.3545	-0.0291455	0.971776
2310057M21Rik	440.49	-0.134344	0.780269
2310061I04Rik	538.735	-0.3185	0.0658318
2310061J03Rik	78.3275	-0.0648023	0.962103
2310065F04Rik	0.537159	0.0184381	NA
2310067B10Rik	423.804	-0.0131335	0.994891
2310068J16Rik	34.296	-0.133769	0.834037
2310069B03Rik	3.59097	0.0244787	NA
2410002F23Rik	2100.28	0.0014728	0.999417
2410004B18Rik	933.958	0.124319	0.723516
2410004I01Rik	2.98399	0.00624786	NA
2410004N09Rik	196.53	-0.0561406	0.967049
2410004P03Rik	7.93739	0.0845585	0.828547
2410006H16Rik	425.012	0.0205228	0.989778
2410012E07Rik	0.842642	0.0132209	NA
2410012M07Rik	104.059	0.128983	0.869725
2410015M20Rik	965.918	0.0243266	0.982106
2410016O06Rik	430.21	0.17783	0.569518
2410018L13Rik	5.89625	-0.0283933	0.971776
2410018M08Rik	590.713	0.0215527	0.987926
2410057H14Rik	0.9504	-0.0319221	NA
2410066E13Rik	98.9054	0.193398	0.698278
2410076I21Rik	257.449	0.221962	0.485015
2410088K16Rik	1.27656	0.0441839	NA
2410089E03Rik	1396.14	-0.390004	0.000764223
2410124H12Rik	0.687481	-0.00886028	NA
2410127L17Rik	51.6193	-0.0300504	0.987001
2410131K14Rik	269.579	0.124187	0.843934
2410133F24Rik	22.7855	-0.0197382	0.991119
2410137F16Rik	9.41581	0.0392743	0.962116
2410137M14Rik	0.485242	-0.0130512	NA
2410141K09Rik	2.74589	-0.0232715	NA
2500004C02Rik	162.253	-0.0814034	0.943635
2510002D24Rik	52.5742	0.122549	0.877412
2510003D18Rik	2.86922	-0.0343738	NA
2510003E04Rik	1330.66	-0.052159	0.939098
2510009E07Rik	190.792	0.0856782	0.936809
2510039O18Rik	1184.15	-0.249743	0.111712
2510049J12Rik	2.78845	-0.00162658	NA
2600006L11Rik	2.63536	-0.0890291	NA
2610001J05Rik	9.26889	-0.031324	0.972654
2610002J02Rik	341.971	-0.079238	0.931787
2610002M06Rik	1011.06	0.185246	0.354439
2610005L07Rik	22.942	-0.0319442	0.982106
2610008E11Rik	824.249	0.0887223	0.854753
2610015P09Rik	510.238	-0.363882	0.0371745
2610016A17Rik	4.17069	0.0546617	NA
2610017I09Rik	0.883024	-0.00163986	NA
2610018G03Rik	306.146	0.306422	0.184877
2610019E17Rik	152.905	0.0701666	0.955561
2610019F03Rik	2696.16	0.160643	0.338655
2610020C07Rik	175.769	-0.0255702	0.989518
2610020H08Rik	1745.16	-1.64418	1.64844e-56
2610027K06Rik	2.40645	0.00313735	NA
2610028E06Rik	1.50095	-0.0167146	NA
2610028H24Rik	7.25139	-0.0475704	0.94119
2610034B18Rik	87.6103	-0.0479451	0.974994
2610034M16Rik	3.03107	-0.0100967	NA
2610035D17Rik	207.285	-0.0621703	0.961174
2610035F20Rik	0.640403	0.00647681	NA
2610044O15Rik8	128.867	0.0142047	0.995419
2610100L16Rik	3.11391	-0.105093	NA
2610203C20Rik	267.292	0.293977	0.23443
2610203C22Rik	10.4802	-0.0169598	0.989518
2610204G22Rik	32.2762	-0.0243757	0.989518
2610206C17Rik	34.9143	-0.0784404	0.943476
2610301B20Rik	783.529	-0.345383	0.0175617
2610301G19Rik	1073.61	-0.4577	6.6596e-05
2610305D13Rik	309.694	-0.015119	0.994891
2610306M01Rik	95.4347	-0.0865962	0.94201
2610307P16Rik	74.7171	0.179599	0.747147
2610316D01Rik	2.73712	0.0486626	NA
2610318N02Rik	36.3128	-0.0265781	0.988514
2610507B11Rik	5053.4	0.0501979	0.910288
2610507I01Rik	363.462	0.00945794	0.995866
2610524H06Rik	592.388	0.0507005	0.957826
2610528A11Rik	1.13234	-0.00926119	NA
2700029M09Rik	1392.44	0.0825332	0.842859
2700038G22Rik	2.16835	-0.0258716	NA
2700046A07Rik	82.6559	0.0903717	0.937778
2700046G09Rik	151.782	-0.341132	0.192289
2700049A03Rik	564.112	-0.391158	0.0121459
2700050L05Rik	1811.99	-0.0360229	0.961174
2700054A10Rik	24.0944	-0.115728	0.854169
2700060E02Rik	1190.61	-0.195221	0.307417
2700062C07Rik	227.07	-0.143757	0.802415
2700070H01Rik	18.6739	0.129321	0.793837
2700081L22Rik	7.5031	-0.0365327	0.961174
2700081O15Rik	385.459	-0.00645047	0.997062
2700086A05Rik	0.647098	0.00630127	NA
2700089E24Rik	1557.38	0.0925206	0.784214
2700094K13Rik	1347.34	0.0885227	0.826291
2700097O09Rik	287.979	-0.0529556	0.964479
2700099C18Rik	409.04	-0.0081461	0.996789
2810001G20Rik	252.451	0.088687	0.918806
2810002D19Rik	164.593	-0.0600405	0.964374
2810004N23Rik	1288.41	0.0143679	0.995419
2810006K23Rik	318.113	0.0196876	0.991895
2810008D09Rik	0.680786	-0.0098401	NA
2810011L19Rik	16.9005	-0.0279752	0.983648
2810013P06Rik	382.179	-0.112561	0.843934
2810021J22Rik	554.963	0.163742	0.578035
2810025M15Rik	561.04	-0.0171377	0.991119
2810029C07Rik	87.3761	-0.348232	0.206799
2810032G03Rik	10.8603	0.0269329	0.980092
2810055G20Rik	28.3355	-0.00152985	0.999417
2810403A07Rik	2214.32	0.00372012	0.99745
2810403D21Rik	45.0473	-0.0375142	0.982054
2810407C02Rik	3124.88	0.123352	0.520765
2810408A11Rik	93.1698	-0.0322866	0.985925
2810408M09Rik	279.318	0.0956563	0.905266
2810410L24Rik	25.4705	-0.00694322	0.997062
2810417H13Rik	155.618	0.201106	0.64171
2810428I15Rik	472.815	-0.117483	0.814466
2810433D01Rik	8.60877	0.048946	0.944026
2810442I21Rik	23.9173	-0.0952021	0.901397
2810442N19Rik	0.640403	0.00647681	NA
2810454H06Rik	51.9117	-0.0358368	0.983803
2810459M11Rik	11.222	0.0358378	0.9725
2810468N07Rik	153.003	0.235986	0.510311
2810474O19Rik	1197.94	0.123671	0.644898
2900002K06Rik	22.7903	-0.0492482	0.966925
2900005J15Rik	12.71	0.19092	0.397153
2900008C10Rik	2.84706	0.0346198	NA
2900009J06Rik	19.9634	-0.00554879	0.997274
2900011O08Rik	9.15714	0.0343247	0.970749
2900026A02Rik	136.712	0.111398	0.8977
2900041M22Rik	25.5715	-0.116472	0.854753
2900052N01Rik	1.38431	-0.003269	NA
2900055J20Rik	0.813468	-0.00641072	NA
2900056M20Rik	337.456	0.177369	0.643371
2900060B14Rik	21.436	-0.0480812	0.967086
2900076A07Rik	50.7345	0.00966656	0.996789
2900092C05Rik	1.52794	-0.0319665	NA
2900093L17Rik	13.833	-0.0274195	0.982106
2900097C17Rik	500.695	-0.147782	0.703016
3-qA2-617	29.9292	-0.39578	0.0477601
3-qA3-2052	26.1511	-0.752503	2.89357e-07
3000002C10Rik	64.8254	-0.280545	0.385876
3010001F23Rik	4.67161	-0.0377625	NA
3010026O09Rik	299.9	0.0504235	0.968522
3010033K07Rik	5.5641	0.0786646	0.806499
3110001D03Rik	563.052	-0.0213792	0.987926
3110001I22Rik	163.512	-0.0672887	0.959574
3110002H16Rik	764.258	-0.016899	0.989935
3110007F17Rik	2.62474	0.0245669	NA
3110009E18Rik	92.6788	0.0169698	0.994891
3110021A11Rik	9.37463	-0.00786056	0.995866
3110021N24Rik	18.8101	-0.054441	0.961066
3110035E14Rik	1012.88	0.139335	0.576567
3110040N11Rik	132.678	0.13689	0.845035
3110043O21Rik	1653.49	-0.0271392	0.974994
3110045C21Rik	63.2625	-0.00776217	0.997062
3110047P20Rik	2.48297	0.00249738	NA
3110052M02Rik	168.977	0.0706168	0.953416
3110056K07Rik	6.39063	-0.0137551	0.989518
3110057O12Rik	187.965	-0.188047	0.667158
3110062M04Rik	109.495	0.0549678	0.971722
3110070M22Rik	11.351	-0.242966	0.171052
3110082I17Rik	315.208	0.106249	0.888981
3110082J24Rik	8.68252	-0.0637652	0.911446
3110099E03Rik	4.51863	-0.0253089	NA
3230401D17Rik	94.9616	-0.0611626	0.966009
3300002I08Rik	15.9608	-0.0217062	0.988514
3425401B19Rik	0.640403	0.00647681	NA
3632451O06Rik	54.4345	0.159306	0.793837
3632454L22Rik	100.939	-0.0524109	0.973327
3830403N18Rik	174.304	-0.525208	0.00790739
3830406C13Rik	726.638	-0.248987	0.180973
3830408C21Rik	55.3852	-0.0960696	0.923823
3830417A13Rik	49.8972	-0.220944	0.571947
3930402G23Rik	26.5036	-0.0701256	0.943194
4-qB3-277	18.6634	-0.583863	3.66658e-05
4-qB3-3994	116.319	-2.12592	3.65323e-40
4-qB3-639	34.9161	-0.93355	1.31892e-09
4-qC5-17839	24.6819	-0.265271	0.289319
4-qD2.2-2182	4.71869	-0.0550212	NA
4-qD2.2-349	58.4732	-0.0160866	0.994891
4430402I18Rik	34.7407	0.00751996	0.997062
4632415K11Rik	120.529	0.0901834	0.935981
4632415L05Rik	217.401	0.118721	0.866911
4632427E13Rik	25.2524	-0.0297915	0.98422
4632428C04Rik	16.231	0.0372047	0.974994
4632428N05Rik	140.301	0.182266	0.719839
4632434I11Rik	801.155	-0.121951	0.732121
4732415M23Rik	293.506	-0.832917	1.53995e-07
4732416N19Rik	15.8377	-0.00621528	0.997057
4732456N10Rik	0.739397	0.0258539	NA
4732471J01Rik	33.2213	-0.292672	0.266993
4732490B19Rik	5.96825	0.00690121	0.995866
4732491K20Rik	105.064	0.0483487	0.974994
4831440E17Rik	158.687	-0.24621	0.469774
4833403I15Rik	74.9737	-0.0139871	0.995866
4833411C07Rik	0.471853	-0.0126354	NA
4833412C05Rik	2.84913	-0.0348129	NA
4833417C18Rik	44.2722	0.0542678	0.969568
4833418N02Rik	34.5656	-0.151018	0.792398
4833419F23Rik	20.7956	0.0217283	0.988514
4833420G17Rik	1508.22	0.115863	0.680099
4833422C13Rik	5.67186	0.0314751	0.964374
4833424O15Rik	147.812	0.182167	0.73173
4833427G06Rik	9.78472	-0.264243	0.0799573
4833439L19Rik	1717.2	0.0710663	0.877412
4921501E09Rik	3.87823	-0.0330661	NA
4921504E06Rik	0.485242	-0.0130512	NA
4921506M07Rik	16.3129	-0.206908	0.410461
4921507L20Rik	0.44486	9.11659e-05	NA
4921507P07Rik	224.822	-0.109604	0.88588
4921508A21Rik	1.08526	0.0060128	NA
4921508D12Rik	0.44486	9.11659e-05	NA
4921509O07Rik	1.01571	0.00195237	NA
4921511C20Rik	0.739397	0.0258539	NA
4921511H03Rik	0.478548	-0.0150979	NA
4921511I17Rik	0.883024	-0.00163986	NA
4921517D22Rik	0.77978	0.0109642	NA
4921524J17Rik	832.449	-0.241347	0.26017
4921524L21Rik	1.52794	-0.0319665	NA
4921525O09Rik	1.19972	-0.0407156	NA
4921530D09Rik	5.08703	-0.0499819	0.910906
4921530L18Rik	35.1714	-0.257443	0.396967
4921531C22Rik	193.125	-0.278967	0.340146
4921531P14Rik	28.3063	-0.110964	0.874918
4921533I20Rik	12.6756	0.0406148	0.968522
4921536K21Rik	29.3736	-0.4757	0.0102716
4921539E11Rik	3.47375	-0.0492911	NA
4922501C03Rik	772.562	-0.050715	0.954673
4922501L14Rik	3.68997	0.0429168	NA
4922502D21Rik	87.3955	-1.78646	8.04746e-29
4922502N22Rik	3.04042	0.00559648	NA
4930401C15Rik	1.17272	-0.0234707	NA
4930402F11Rik	1.52125	-0.0307321	NA
4930402H24Rik	1083.54	0.0607213	0.924373
4930404A10Rik	50.8168	-1.03536	2.98325e-10
4930404H11Rik	1.25833	-0.00765918	NA
4930404I05Rik	2.82214	-0.0182006	NA
4930404N11Rik	0.77978	0.0109642	NA
4930405A21Rik	16.6683	-0.0297876	0.982054
4930405J17Rik	0.77978	0.0109642	NA
4930407I10Rik	0.640403	0.00647681	NA
4930412C18Rik	31.583	0.0466212	0.973663
4930412O13Rik	0.923407	-0.0185878	NA
4930413F20Rik	1.76387	-0.039852	NA
4930413G21Rik	16.7839	0.0724559	0.931787
4930414L22Rik	78.1483	-0.0550905	0.971776
4930414N06Rik	0.606715	0.0185374	NA
4930415F15Rik	5.92994	-0.0442039	0.943476
4930415O20Rik	1.58655	0.00467359	NA
4930417O13Rik	0.471853	-0.0126354	NA
4930417O22Rik	10.7868	-0.244102	0.150968
4930422G04Rik	736.952	-0.395244	0.00480466
4930423M02Rik	1.69165	-0.0537126	NA
4930425O10Rik	14.3829	-0.160524	0.574735
4930426D05Rik	29.9294	0.13573	0.819011
4930426L09Rik	11.359	0.0105487	0.994891
4930427A07Rik	275.73	-0.070447	0.944026
4930428E07Rik	0.404477	0.0124042	NA
4930428G15Rik	0.44486	9.11659e-05	NA
4930429B21Rik	4.30359	0.0437664	NA
4930429D17Rik	2.05575	-0.026108	NA
4930429F24Rik	26.5969	-0.604783	0.000165542
4930430A15Rik	15.1044	-0.474894	0.000538289
4930430D24Rik	6.88289	0.0537057	0.923823
4930430F08Rik	525.557	0.247045	0.246926
4930431F12Rik	2.02238	0.0127585	NA
4930431P03Rik	0.438165	0.000258372	NA
4930432J09Rik	0.820163	-0.00569115	NA
4930432K21Rik	249.348	-0.9014	5.68005e-09
4930433I11Rik	0.577542	0.00160495	NA
4930441O14Rik	7.99297	0.0102658	0.994891
4930442J19Rik	0.714474	-0.0244123	NA
4930442L01Rik	1.40865	-0.0348331	NA
4930443O20Rik	1.55712	-0.0103741	NA
4930444A02Rik	264.381	0.141262	0.804196
4930444M15Rik	0.478548	-0.0150979	NA
4930444P10Rik	9.1644	-0.272893	0.0523815
4930447C04Rik	3014.35	-0.496104	8.17789e-07
4930447K03Rik	0.404477	0.0124042	NA
4930447N08Rik	1.0427	-0.0127074	NA
4930448I18Rik	0.640403	0.00647681	NA
4930448K20Rik	1.17756	0.0266267	NA
4930451C15Rik	9.99309	0.0458094	0.955561
4930451G09Rik	85.8966	-0.487633	0.0282582
4930452B06Rik	243.122	-0.0994337	0.900128
4930452G13Rik	16.8256	-0.392881	0.0114454
4930453N24Rik	615.228	-0.404952	0.00468135
4930455B14Rik	6.2412	-0.204946	0.101805
4930455D15Rik	4.52256	-0.140897	NA
4930455F23Rik	788.85	-0.524706	0.000343124
4930455J16Rik	0.813468	-0.00641072	NA
4930465K10Rik	6.10018	-0.161833	0.246926
4930467D21Rik	31.949	-0.360297	0.110561
4930467K11Rik	1.15933	-0.0272651	NA
4930469G21Rik	0.577542	0.00160495	NA
4930470P17Rik	6.28043	0.0026686	0.999068
4930471M09Rik	9.47846	0.0601465	0.928752
4930473A02Rik	1.91419	-0.064909	NA
4930474G06Rik	0.485242	-0.0130512	NA
4930474N09Rik	1.10801	0.0226174	NA
4930478L05Rik	0.714474	-0.0244123	NA
4930479D17Rik	3.6244	0.0125472	NA
4930479M11Rik	54.0166	0.330216	0.230595
4930481A15Rik	45.6705	0.0409303	0.978339
4930483J18Rik	2.94143	-0.0145384	NA
4930486L24Rik	394.839	-0.222049	0.490528
4930487H11Rik	0.96379	-0.0322812	NA
4930488L21Rik	2.88467	-0.0956972	NA
4930500J02Rik	1.45387	0.00114752	NA
4930500L23Rik	1.62694	-0.0117423	NA
4930502E09Rik	3.23113	-0.040876	NA
4930502E18Rik	450.403	0.117634	0.842642
4930503B20Rik	3.61068	-0.0779576	NA
4930503E14Rik	13.2322	-0.109606	0.809333
4930503E24Rik	125.266	-0.0573427	0.968522
4930503L19Rik	379.569	-0.580949	0.00010194
4930504O13Rik	29.4234	-0.287232	0.260922
4930505A04Rik	1.92147	0.0162119	NA
4930506C21Rik	8.37008	-0.0531875	0.938231
4930506M07Rik	2092.52	0.234846	0.058338
4930507D05Rik	19.6634	-0.143305	0.751806
4930509E16Rik	17.0903	-0.133104	0.767317
4930511A02Rik	1.54617	0.0209137	NA
4930511E03Rik	3.40637	-0.0154994	NA
4930511M06Rik	27.4936	0.0312859	0.984021
4930511M11Rik	13.662	-0.435043	0.00132313
4930513N10Rik	50.5561	-0.405431	0.0890468
4930515G01Rik	15.9343	0.0651317	0.94233
4930515G16Rik	1.32788	-0.00249308	NA
4930518P08Rik	0.438165	0.000258372	NA
4930519F09Rik	19.1589	0.116926	0.831559
4930519G04Rik	1.44903	-0.0468163	NA
4930520O04Rik	20.8523	-0.0626498	0.948977
4930522O17Rik	0.813468	-0.00641072	NA
4930523C07Rik	114.304	0.200044	0.672258
4930524B15Rik	388.371	-1.45345	2.10609e-23
4930524C18Rik	0.640403	0.00647681	NA
4930524L23Rik	24.1284	-0.058504	0.960751
4930524O08Rik	2.35235	-0.0690247	NA
4930525D18Rik	14.4534	-0.383734	0.0115828
4930525G20Rik	9.70019	-0.0112867	0.994891
4930526D03Rik	0.687481	-0.00886028	NA
4930526L06Rik	2.65603	-0.0101205	NA
4930528A17Rik	44.7269	-0.688314	0.000101503
4930529C04Rik	0.640403	0.00647681	NA
4930529M08Rik	20.0626	-0.142867	0.739127
4930538K18Rik	8.42141	-0.0940289	0.800107
4930539C22Rik	3.46924	-0.0107232	NA
4930539E08Rik	96.7917	0.0971527	0.927795
4930539J05Rik	26.7277	-0.129619	0.823176
4930540M03Rik	0.485242	-0.0130512	NA
4930542D17Rik	0.537159	0.0184381	NA
4930543E12Rik	1.51248	0.0384662	NA
4930544G11Rik	7.78068	-0.19403	0.229297
4930546K05Rik	4.61762	-0.00588274	NA
4930547C10Rik	3.27428	0.0677555	NA
4930547E08Rik	2.38397	-0.017735	NA
4930547E14Rik	0.930102	-0.0163571	NA
4930548H24Rik	2.37303	0.0149464	NA
4930549G23Rik	15.2984	-0.333903	0.0479802
4930550C14Rik	39.6266	-0.0459541	0.974994
4930550L24Rik	3747.72	0.0944585	0.679475
4930552N02Rik	0.570847	0.00173947	NA
4930552P12Rik	10.6034	-0.12599	0.699401
4930553E22Rik	2.64205	-0.0883294	NA
4930556C24Rik	1.48756	-0.0163624	NA
4930556M19Rik	79.1716	-0.0887455	0.939764
4930558K02Rik	17.5141	-0.378332	0.0251474
4930562C15Rik	1.48756	-0.0163624	NA
4930562F07Rik	0.44486	9.11659e-05	NA
4930563D23Rik	0.577542	0.00160495	NA
4930563E18Rik	2.49901	0.0182085	NA
4930563E22Rik	145.006	-0.113834	0.893081
4930563F08Rik	0.912462	0.0129615	NA
4930563M20Rik	6.02165	-0.107796	0.654023
4930564G21Rik	0.806773	-0.00535528	NA
4930564K09Rik	12.8477	-0.217421	0.29097
4930565N06Rik	0.606715	0.0185374	NA
4930567H12Rik	0.485242	-0.0130512	NA
4930567K20Rik	0.478548	-0.0150979	NA
4930568D16Rik	3.00004	0.0220698	NA
4930568E12Rik	11.3549	-0.348514	0.0111066
4930570G19Rik	17.6561	0.184154	0.534788
4930572O03Rik	0.680786	-0.0098401	NA
4930577N17Rik	91.0551	-0.0825002	0.944026
4930578C19Rik	5.45809	-0.0279717	0.971068
4930578E11Rik	0.970485	-0.027552	NA
4930578M01Rik	11.1601	0.195742	0.348041
4930579F01Rik	0.537159	0.0184381	NA
4930579G18Rik	2.7055	-0.00594715	NA
4930579G24Rik	330.705	-0.723158	1.41981e-06
4930579K19Rik	55.1081	-0.245208	0.483046
4930581F22Rik	55.8986	0.0203998	0.994234
4930583K01Rik	6.90674	-0.171389	0.293734
4930584F24Rik	2.62718	0.0620454	NA
4930590J08Rik	5.80454	0.0346387	0.961066
4930590L20Rik	1.38857	-0.0343266	NA
4930591A17Rik	4.79249	-0.0708815	NA
4930592A05Rik	1.21794	0.0106187	NA
4930593A02Rik	1.89389	-0.049645	NA
4930593C16Rik	0.813468	-0.00641072	NA
4930594C11Rik	70.7164	0.198759	0.679283
4930595M18Rik	160.849	0.139797	0.83548
4930599N23Rik	11.6641	-0.0734459	0.90382
4931402G19Rik	0.478548	-0.0150979	NA
4931406B18Rik	2.76193	-0.00500109	NA
4931406C07Rik	906.694	0.0573769	0.941416
4931406H21Rik	2.57282	-0.00917905	NA
4931406P16Rik	3483.78	0.0199531	0.979773
4931408C20Rik	0.577542	0.00160495	NA
4931409K22Rik	4.55901	-0.0417905	NA
4931414P19Rik	160.02	0.194717	0.663696
4931417E11Rik	7.21918	-0.162319	0.31071
4931419H13Rik	1.05609	-0.0151506	NA
4931423N10Rik	4.68016	-0.0894674	NA
4931428F04Rik	209.965	0.10107	0.902791
4931428L18Rik	22.9464	-0.481987	0.00410954
4931429I11Rik	11.4341	-0.247429	0.154091
4931429P17Rik	0.883024	-0.00163986	NA
4931431C16Rik	2.60226	0.00638713	NA
4931440F15Rik	1.14169	0.00494021	NA
4931440J10Rik	2.9952	-0.0320774	NA
4931440L10Rik	4.49578	-0.140459	NA
4931440P22Rik	26.3076	-0.182185	0.642752
4932411E22Rik	0.478548	-0.0150979	NA
4932411N23Rik	0.485242	-0.0130512	NA
4932412D23Rik	12.8277	-0.125	0.747908
4932413F04Rik	6.2479	-0.20241	0.106113
4932414N04Rik	8.87656	-0.288292	0.025469
4932415G12Rik	21.2107	-0.331154	0.100875
4932415M13Rik	0.9504	-0.0319221	NA
4932416H05Rik	122.673	-0.431333	0.0640626
4932416K20Rik	0.674091	-0.00851858	NA
4932418E24Rik	6.24212	-0.0478872	0.937778
4932429P05Rik	1.59325	0.00448645	NA
4932435O22Rik	4.55742	0.00527755	NA
4932438A13Rik	6283.59	-0.546399	2.04777e-10
4932438H23Rik	2.39769	0.0660384	NA
4932441J04Rik	1.3865	0.0336547	NA
4932443I19Rik	0.478548	-0.0150979	NA
4933400C23Rik	6.41577	0.0209875	0.981182
4933400F21Rik	0.478548	-0.0150979	NA
4933401D09Rik	21.9845	0.175763	0.630694
4933401H06Rik	2.31197	-0.0516814	NA
4933402E13Rik	7035.71	0.267155	0.0161523
4933402J07Rik	4.58394	0.0102359	NA
4933402J15Rik	0.44486	9.11659e-05	NA
4933403O08Rik	60.0213	0.210111	0.63552
4933405D12Rik	6.11373	-0.0680281	0.860727
4933405L10Rik	4.99559	0.00457783	NA
4933405O20Rik	1.84012	-0.0356587	NA
4933406C10Rik	41.9452	-0.579402	0.00185173
4933406F09Rik	0.714474	-0.0244123	NA
4933406I18Rik	7.27084	-0.133791	0.51885
4933406J08Rik	262.599	-0.595372	0.000613609
4933406K04Rik	2.58828	-0.0768808	NA
4933406M09Rik	3.05381	0.00523232	NA
4933407K13Rik	45.25	0.00832513	0.997057
4933408B17Rik	37.7961	-0.604511	0.000799606
4933408J17Rik	5.36372	0.0199254	0.980236
4933409G03Rik	5.50664	-0.184542	0.137621
4933411E08Rik	5.42924	0.039004	0.946536
4933411G06Rik	0.9504	-0.0319221	NA
4933411G11Rik	37.7402	-0.839097	1.45821e-07
4933411K16Rik	3.90766	-0.0169739	NA
4933411K20Rik	914.719	-0.285342	0.0591512
4933412E12Rik	50.2721	-0.157262	0.796923
4933412E24Rik	16.2082	-0.32051	0.06685
4933413G19Rik	0.883024	-0.00163986	NA
4933413J09Rik	66.5791	0.209702	0.637288
4933415F23Rik	44.4939	-1.03448	1.00524e-10
4933416C03Rik	718.912	-0.999773	4.43771e-14
4933416M07Rik	25.9393	-0.16985	0.678644
4933417D19Rik	8.0105	-0.116414	0.665368
4933417E11Rik	1.06278	-0.0131905	NA
4933417G07Rik	12.8735	-0.017822	0.989822
4933417O13Rik	0.478548	-0.0150979	NA
4933421I07Rik	1.77056	-0.0404782	NA
4933421O10Rik	189.428	-0.117827	0.877379
4933422A05Rik	1.17756	0.0266267	NA
4933422H20Rik	2.66087	0.0441819	NA
4933424G05Rik	5.64879	-0.0722197	0.842336
4933424G06Rik	1.45387	0.00114752	NA
4933425L06Rik	80.8123	-0.784559	1.79025e-05
4933426M11Rik	1395.47	-0.0403784	0.961174
4933427D06Rik	951.887	0.229605	0.167377
4933427D14Rik	341.28	-0.10739	0.869066
4933427E11Rik	10.4677	-0.205286	0.231048
4933427G17Rik	72.8613	-0.795882	1.23528e-05
4933428C19Rik	0.577542	0.00160495	NA
4933430H16Rik	7.20591	-0.0805625	0.840507
4933430I17Rik	49.5634	-0.242388	0.490619
4933430M04Rik	0.537159	0.0184381	NA
4933431E20Rik	377.459	0.114463	0.841071
4933431G14Rik	2.41282	-0.0771672	NA
4933432I03Rik	0.570847	0.00173947	NA
4933432K03Rik	4.10321	-0.00955973	NA
4933433C11Rik	3.73885	-0.0352835	NA
4933433G15Rik	53.842	-0.648755	0.000560128
4933434E20Rik	795.532	0.068567	0.914602
4933434I20Rik	15.1378	-0.454199	0.000851823
4933438B17Rik	5.54348	0.00677947	0.995866
4933439C10Rik	128.715	-0.271167	0.408368
4933440J02Rik	1.49425	-0.0169153	NA
4933440M02Rik	0.478548	-0.0150979	NA
5-qF-14224	54.4655	-1.22777	3.47385e-14
5-qF-14508	34.7742	-0.802465	3.01074e-07
5-qF-4633	87.8726	-0.0279189	0.988846
5-qG2-2301	48.4766	-0.562058	0.00376571
5-qG2-950	2.12982	-0.0593821	NA
5-qG3-23659	101.274	-1.87597	3.02294e-31
5031410I06Rik	2.67851	0.0109291	NA
5031414D18Rik	269.332	0.119389	0.854753
5031425E22Rik	247.93	-0.140106	0.804196
5031425F14Rik	0.680786	-0.0098401	NA
5031426D15Rik	16.3886	0.0762829	0.919476
5031434C07Rik	8.35063	0.0344876	0.968522
5031434O11Rik	6.00678	0.0420938	0.944026
5031439G07Rik	435.766	0.0227188	0.988145
5033403H07Rik	28.3846	-0.00141972	0.999417
5033404E19Rik	0.872079	0.0295419	NA
5033406O09Rik	2.99095	0.000659162	NA
5033411D12Rik	72.9278	0.185777	0.725162
5330413P13Rik	0.820163	-0.00569115	NA
5330417C22Rik	48.2424	-0.200335	0.651415
5330426P16Rik	49.9383	-0.06864	0.958866
5330439B14Rik	0.537159	0.0184381	NA
5430402O13Rik	43.0814	-0.0270152	0.988514
5430405H02Rik	45.3085	0.109914	0.897696
5430416O09Rik	185.019	0.0717454	0.950307
5430417L22Rik	392.423	-0.412585	0.0159022
5430419D17Rik	0.714474	-0.0244123	NA
5430421F17Rik	0.773085	0.0111477	NA
5430427O19Rik	5.11015	0.0597759	0.880802
5430435G22Rik	1246.33	0.125328	0.661427
5430437J10Rik	0.537159	0.0184381	NA
5530601H04Rik	64.468	-0.00876818	0.997057
5730403I07Rik	11.1181	-0.0374923	0.969065
5730405O15Rik	17.3523	0.0471122	0.966486
5730408K05Rik	169.711	0.000433515	0.999552
5730409E04Rik	218.182	0.277983	0.311973
5730412P04Rik	1.79549	0.0129474	NA
5730416F02Rik	1.58873	0.0405917	NA
5730420D15Rik	0.606715	0.0185374	NA
5730422E09Rik	7.11845	-0.0475278	0.943197
5730435O14Rik	1.21794	0.0106187	NA
5730455P16Rik	634.78	-0.112299	0.802415
5730457N03Rik	3.31614	-0.101926	NA
5730480H06Rik	49.1261	-0.028094	0.988458
5730488B01Rik	0.570847	0.00173947	NA
5730507C01Rik	61.0279	-0.0455182	0.97677
5730508B09Rik	816.463	-0.129098	0.738576
5730522E02Rik	3.12396	0.0945677	NA
5730559C18Rik	14.2178	0.0811657	0.89976
5730577I03Rik	17.3136	0.0205267	0.989518
5830403L16Rik	1.2942	0.0114053	NA
5830403M04Rik	1.42225	-0.0461695	NA
5830411N06Rik	0.438165	0.000258372	NA
5830415F09Rik	263.446	-0.143494	0.787802
5830416P10Rik	5.58174	0.0469803	0.932324
5830417I10Rik	201.053	-0.0521127	0.969065
5830418K08Rik	1972.1	-0.268049	0.0192647
5830418P13Rik	3.1416	0.0636006	NA
5830428M24Rik	1.21125	0.00973876	NA
5830432E09Rik	0.883024	-0.00163986	NA
5830444B04Rik	4.93464	0.0413646	NA
5830454E08Rik	24.2881	-0.0692166	0.944026
5830473C10Rik	0.721169	-0.0245996	NA
5930403L14Rik	24.0712	0.0409631	0.974994
5930412G12Rik	18.6281	0.0180111	0.991895
5930438M14Rik	0.820163	-0.00569115	NA
6-qC3-100	20.7055	-0.219471	0.414327
6-qC3-2394	46.106	-0.55305	0.00397386
6-qC3-6258	102.954	-2.07171	3.79674e-38
6-qD1-2831	97.3536	-0.668887	0.00050865
6-qF3-1063	72.5761	-0.367978	0.1619
6-qF3-28913	22.9322	-0.51098	0.00127684
6-qF3-3040	306.67	-1.09799	1.60566e-14
6-qF3-8009	88.6183	-1.90961	1.15849e-32
6030408B16Rik	526.254	-0.114316	0.808624
6030419C18Rik	35.7639	-0.0731024	0.948216
6030440G07Rik	1.57051	-0.0107079	NA
6030458C11Rik	706.404	-0.0727441	0.907812
6030466F02Rik	2.47627	0.00277554	NA
6030498E09Rik	15.256	0.101854	0.853435
6230400D17Rik	28.423	-0.122389	0.847844
6330403A02Rik	13.7449	0.028792	0.979773
6330403K07Rik	52.6591	0.0158709	0.994891
6330403M23Rik	200.204	0.053395	0.968522
6330408A02Rik	214.847	-0.0561169	0.968522
6330409D20Rik	0.773085	0.0111477	NA
6330410L21Rik	0.680786	-0.0098401	NA
6330415B21Rik	1.79549	0.0129474	NA
6330416G13Rik	156.819	0.0682147	0.95699
6330418K02Rik	47.555	0.00712327	0.997274
6330549D23Rik	133.409	-0.14079	0.837648
6430411K18Rik	3.07629	0.0267437	NA
6430531B16Rik	25.4714	-0.481105	0.00432873
6430548M08Rik	265.526	-0.0805436	0.934004
6430550D23Rik	27.6305	-0.307533	0.201687
6430562O15Rik	7.55698	0.0460221	0.944385
6430571L13Rik	28.3654	0.0665828	0.95298
6430573F11Rik	55.0944	0.158818	0.796923
6430584L05Rik	4.64037	0.00947063	NA
6530402F18Rik	30.9353	0.0495229	0.971776
6530411M01Rik	2.41825	0.0499201	NA
6720401G13Rik	399.57	0.188364	0.563002
6720456H20Rik	589.734	-1.4976e-05	0.99994
6720468P15Rik	9.85291	-0.0177282	0.988514
6720483E21Rik	23.1078	0.146722	0.759741
6720489N17Rik	98.6401	-0.0728943	0.955561
6820408C15Rik	57.7976	-0.166323	0.780269
6820431F20Rik	52.5314	0.115301	0.892068
6820431F20Rik.2	167.493	-0.0300549	0.985925
7-qB5-6255	120.741	-2.26764	1.20259e-45
7-qD1-16444	36.8079	-0.173579	0.320057
7-qD1-19431	25.6821	-0.629659	4.59327e-05
7-qD1-654	18.6029	-0.569369	6.72243e-05
7-qD1-9417	22.3976	-0.656029	8.34071e-06
7-qD2-11976	98.5735	-1.98056	7.21132e-35
7-qD2-24830	54.9053	-1.24431	1.29927e-14
7-qD2-40	12.6351	-0.0379654	0.971776
7-qF3-246	4.00363	-0.108333	NA
7-qF3-3125	47.9979	-1.02577	9.51461e-11
7420426K07Rik	0.537159	0.0184381	NA
7420700N18Rik	1.29202	-0.0237479	NA
7630403G23Rik	0.404477	0.0124042	NA
8-qA2-343	11.4916	-0.349936	0.00987256
8-qA4-155	0.916712	-0.018406	NA
8-qA4-332	0.721169	-0.0245996	NA
8-qC5-2209	150.752	-2.47023	1.60702e-54
8-qC5-8200	157.762	-2.52762	4.09641e-57
8-qE1-3748	18.7469	-0.508088	0.000790204
8030411F24Rik	1369.69	0.34567	0.0124732
8030423F21Rik	6.48533	0.025479	0.974994
8030423J24Rik	0.44486	9.11659e-05	NA
8030443G20Rik	0.889719	-0.00172122	NA
8030462N17Rik	823.549	-0.0382835	0.968522
8430403D17Rik	0.739397	0.0258539	NA
8430408G22Rik	24.1421	0.0108387	0.995866
8430410A17Rik	446.513	-0.284933	0.157721
8430419L09Rik	132.862	-0.146016	0.825101
8430423G03Rik	0.674091	-0.00851858	NA
8430426J06Rik	15.6866	-0.0504593	0.961174
8430427H17Rik	734.515	-0.260409	0.135186
8430429K09Rik	162.84	-0.207217	0.610248
8430431K14Rik	0.537159	0.0184381	NA
9-qA1-178	78.0605	-1.07879	2.55044e-10
9-qA5.3-1495	10.0359	-0.315232	0.0190821
9-qA5.3-24188	18.5554	-0.499615	0.000657634
9-qC-10667	84.6304	-1.68992	1.20312e-25
9-qC-31469	121.58	-2.07448	3.44889e-38
9-qF4-150	20.7243	-0.460163	0.00526096
9030025P20Rik	13.0616	-0.0697719	0.921792
9030612E09Rik	47.6882	0.106757	0.902398
9030617O03Rik	42.7891	-0.0141701	0.995079
9030624G23Rik	16.5335	-0.0648038	0.943635
9030624J02Rik	2540.96	0.0965648	0.707766
9130008F23Rik	9.87347	-0.0390326	0.966009
9130011E15Rik	524.15	-0.0565796	0.954872
9130015L21Rik	0.577542	0.00160495	NA
9130017N09Rik	12.6732	0.0124193	0.994891
9130019O22Rik	46.395	-0.163196	0.771341
9130019P16Rik	17.0939	0.0366052	0.974994
9130023H24Rik	295.362	-0.364897	0.0718618
9130024F11Rik	3.25387	-0.0206347	NA
9130206I24Rik	16.5361	-0.0513677	0.961174
9130221H12Rik	76.978	0.1158	0.894386
9130227L01Rik	0.478548	-0.0150979	NA
9130401M01Rik	1024.14	0.205912	0.280809
9130409I23Rik	0.537159	0.0184381	NA
9230102K24Rik	2.70125	0.0267307	NA
9230104L09Rik	21.2838	-0.0634738	0.948587
9230105E05Rik	2.60837	-0.0760168	NA
9230110C19Rik	492.592	-0.604128	1.22027e-05
9230112J17Rik	0.577542	0.00160495	NA
9230115E21Rik	2.53244	0.00716238	NA
9230116N13Rik	56.056	0.0678219	0.960751
9330020H09Rik	108.661	-0.15265	0.814466
9330102E08Rik	3.59729	-0.0761986	NA
9330111N05Rik	3.62015	0.0458309	NA
9330117O12Rik	0.957095	-0.0327096	NA
9330133O14Rik	76.153	0.305729	0.31849
9330151L19Rik	314.196	0.0289661	0.98422
9330159F19Rik	26.148	0.154275	0.754693
9330159M07Rik	20.716	-0.0660818	0.944026
9330179D12Rik	7.36894	0.0940257	0.76027
9330182L06Rik	143.67	0.258613	0.443641
9430008C03Rik	3.20679	-0.00701116	NA
9430015G10Rik	523.887	-0.258992	0.202453
9430016H08Rik	575.575	0.0313037	0.978679
9430018G01Rik	28.6546	-0.0166172	0.994891
9430020K01Rik	2936.31	0.18592	0.144619
9430021M05Rik	8.26317	0.0644443	0.902329
9430023L20Rik	726.864	0.00295444	0.999302
9430037G07Rik	23.7381	-0.0173752	0.994234
9430038I01Rik	236.372	0.14221	0.802415
9430041J12Rik	75.0113	0.146319	0.83312
9430060I03Rik	8.53682	0.0279527	0.975781
9430069I07Rik	0.570847	0.00173947	NA
9430076C15Rik	7.74525	-0.0255071	0.977781
9430076G02Rik	2.84488	-0.00268079	NA
9430083A17Rik	108.193	0.072547	0.955561
9430091E24Rik	33.0604	-0.120142	0.866169
9530002B09Rik	41.0262	-0.024766	0.989518
9530026P05Rik	5.48763	0.0768392	0.784077
9530027J09Rik	1.70988	-0.00745125	NA
9530036O11Rik	1.82917	-0.00465081	NA
9530048J24Rik	0.647098	0.00630127	NA
9530051G07Rik	7.89031	0.100802	0.759741
9530052E02Rik	0.537159	0.0184381	NA
9530059O14Rik	0.674091	-0.00851858	NA
9530068E07Rik	4112.52	0.179804	0.232379
9530077C05Rik	343.272	-0.162078	0.682071
9530080O11Rik	25.7923	-0.237291	0.407613
9530082P21Rik	9.96609	0.0620582	0.926869
9530091C08Rik	5.75507	0.0298931	0.968522
9630028B13Rik	9.88235	-0.00445791	0.997274
9630028H03Rik	0.739397	0.0258539	NA
9630033F20Rik	591.074	0.0309615	0.97846
9830001H06Rik	505.153	0.182082	0.517884
9830132P13Rik	1.35732	0.0127143	NA
9830147E19Rik	406.42	0.0678004	0.94233
9830166K06Rik	4.8696	0.00114031	NA
9930012K11Rik	51.2323	0.0619134	0.963027
9930013L23Rik	62.9745	-0.0623924	0.964004
9930014A18Rik	25.2278	-0.0742207	0.94201
9930021J03Rik	2072.68	-0.200801	0.133096
9930104L06Rik	347.961	0.00428571	0.999068
9930111J21Rik1	0.640403	0.00647681	NA
A030009H04Rik	893.508	0.0875806	0.851663
A130010J15Rik	228.725	-0.146998	0.800107
A130049A11Rik	149.156	-0.0597864	0.964611
A130077B15Rik	0.537159	0.0184381	NA
A1cf	4.0777	-0.136396	NA
A230009B12Rik	2.50996	-0.0145116	NA
A230028O05Rik	1.87381	-0.0524073	NA
A230046K03Rik	1647.87	0.153243	0.424017
A230050P20Rik	69.8965	0.201506	0.671004
A230056J06Rik	6.32533	-0.048454	0.934044
A230056P14Rik	28.1286	-0.0667768	0.951842
A230057D06Rik	18.4438	0.0661443	0.943635
A230065H16Rik	21.2009	0.0184437	0.991895
A230070E04Rik	1.25163	-0.0074754	NA
A230072C01Rik	50.2036	-0.0645809	0.961174
A230072E10Rik	5.09133	-0.072111	0.818991
A230073K19Rik	2.06059	0.0249153	NA
A230077H06Rik	1.11895	-0.0101427	NA
A2AKI0	121.541	0.145786	0.827033
A2ASR7	96.4725	-0.0818075	0.944026
A2BHQ5	1.17272	-0.0234707	NA
A2J011	0.537159	0.0184381	NA
A2NTU7	0.680786	-0.0098401	NA
A2m	11.4898	0.0618067	0.934765
A330009N23Rik	15.01	-0.0708392	0.928951
A330021E22Rik	229.795	-1.32256	3.59267e-18
A330023F24Rik	46.8691	0.0367715	0.982311
A330032B11Rik	4.38436	0.0180192	NA
A330035P11Rik	65.6741	-0.239764	0.523407
A330040F15Rik	2.47627	0.00277554	NA
A330041J22Rik	133.715	0.0722194	0.955561
A330048O09Rik	1.59994	0.00393762	NA
A330049N07Rik	1.87174	0.0149681	NA
A330050B17Rik	7.82235	0.0525106	0.937319
A330050F15Rik	0.404477	0.0124042	NA
A330069E16Rik	51.7268	-0.18748	0.702213
A330076C08Rik	3.36806	-0.0693986	NA
A330076H08Rik	19.1319	0.128434	0.795205
A330102I10Rik	6.8288	-0.0147279	0.989518
A3KML5	388.48	-0.0394958	0.974994
A3galt2	3.25361	-0.0182352	NA
A430005L14Rik	390.022	-0.1788	0.580159
A430033K04Rik	165.859	0.180247	0.71735
A430035B10Rik	54.0003	-0.24075	0.51446
A430071A18Rik	7.21319	0.000411767	0.999417
A430078G23Rik	41.4841	0.124947	0.866429
A430088P11Rik	0.77978	0.0109642	NA
A430092G05Rik	1.42688	0.0167984	NA
A430105I19Rik	47.4588	-0.124727	0.869903
A4galt	93.3593	-0.0670085	0.961174
A530013C23Rik	1.00476	0.0283898	NA
A530016L24Rik	0.674091	-0.00851858	NA
A530046M15Rik	0.471853	-0.0126354	NA
A530053G22Rik	0.478548	-0.0150979	NA
A530054K11Rik	419.265	0.109107	0.850125
A530064D06Rik	3.06051	0.00485659	NA
A530065N20Rik	0.438165	0.000258372	NA
A530072M11Rik	28.3473	0.0325139	0.983246
A530088E08Rik	2.47834	-0.0638949	NA
A530099J19Rik	1.27863	-0.0196236	NA
A630001G21Rik	7.86002	0.0112036	0.994418
A630007B06Rik	921.441	0.0783529	0.899154
A630019I02Rik	0.916712	-0.018406	NA
A630020A06	7.54693	-0.142551	0.474516
A630023A22Rik	6.31045	0.100146	0.707755
A630023P12Rik	0.438165	0.000258372	NA
A630033H20Rik	21.8238	0.128492	0.806499
A630066F11Rik	60.4248	-0.125871	0.875425
A630072M18Rik	172.128	-0.0721394	0.950635
A630073D07Rik	14.2841	-0.00249499	0.999302
A630075F10Rik	3.4449	0.0215327	NA
A630077J23Rik	46.0016	-0.0822161	0.942
A630089N07Rik	32.2313	0.0809194	0.936919
A630095N17Rik	1.17963	-0.0330246	NA
A6NAV6	3.26966	-0.00272278	NA
A730008H23Rik	17.5242	0.155572	0.658738
A730017C20Rik	413.117	0.0786018	0.933636
A730017L22Rik	35.9403	0.0623238	0.961174
A730020E08Rik	3.64012	-0.054121	NA
A730020M07Rik	1.46057	0.000961105	NA
A730043L09Rik	0.570847	0.00173947	NA
A730046J19Rik	44.8958	0.137571	0.840507
A730056A06Rik	41.3969	0.148924	0.807509
A730085A09Rik	49.5125	0.0198601	0.994234
A730090H04Rik	3.08809	0.0697156	NA
A730090N16Rik	5.31653	-0.0640865	0.861744
A730098P11Rik	103.534	-0.0708997	0.95773
A830009L08Rik	2.98851	-0.0321978	NA
A830010M20Rik	345.416	-0.188031	0.574735
A830018L16Rik	27.8769	-0.669613	9.06583e-06
A830019L24Rik	0.577542	0.00160495	NA
A830052D11Rik	3.59522	-0.00760653	NA
A830080D01Rik	1302.46	0.025192	0.980058
A830082K12Rik	2.87612	-0.0497886	NA
A830082N09Rik	30.4474	0.0490612	0.971776
A930001C03Rik	1.99103	0.0214054	NA
A930003A15Rik	0.727864	-0.021088	NA
A930003O13Rik	0.44486	9.11659e-05	NA
A930004D18Rik	19.8702	-0.0848782	0.91075
A930005H10Rik	61.5665	-0.291827	0.346794
A930006K02Rik	27.3571	0.03446	0.979867
A930007I19Rik	7.97692	-0.00458429	0.997062
A930009A15Rik	0.674091	-0.00851858	NA
A930011G23Rik	1.91478	0.0148137	NA
A930011O12Rik	1.49425	-0.0169153	NA
A930012L18Rik	3.35989	0.0830472	NA
A930013F10Rik	41.9229	-0.0865029	0.937026
A930015D03Rik	5.92994	-0.0442039	0.943476
A930016O22Rik	1.51248	0.0384662	NA
A930017M01Rik	0.640403	0.00647681	NA
A930018P22Rik	13.9184	0.00252451	0.999302
A930024E05Rik	63.4116	0.0021289	0.999417
A930041C12Rik	11.1279	0.0674214	0.919476
AA387883	0.537159	0.0184381	NA
AA388235	12.116	0.00565685	0.997062
AA414768	622.301	0.346596	0.0277047
AA415398	77.1892	-0.0340533	0.98422
AA465934	40.7258	-0.0489618	0.973596
AA467197	242.373	-0.96234	4.3506e-10
AA474331	79.7758	0.0104036	0.996789
AA543186	28.5416	-0.0950782	0.908614
AA986860	24.4663	0.0321568	0.982639
AA987161	617.766	0.104324	0.835376
AB124611	10.1055	0.0663265	0.915511
AF251705	34.2231	0.00880629	0.996796
AF357355	76.5742	0.0984592	0.925786
AF357399	8.92248	-0.0844626	0.848318
AF357425	25.1931	-0.0343932	0.979773
AF357426	0.537159	0.0184381	NA
AF529169	7.14337	0.00157469	0.999417
AI118078	45.5286	-0.028972	0.987001
AI182371	28.6966	-0.15649	0.759575
AI197445	0.674091	-0.00851858	NA
AI314180	3647.69	0.00366402	0.997153
AI314278	0.889719	-0.00172122	NA
AI314831	102.725	0.138121	0.849408
AI316807	560.644	0.14503	0.674349
AI317395	1.72349	-0.0247526	NA
AI413582	74.248	-0.125593	0.878247
AI414108	199.593	0.243538	0.470605
AI427809	46.0166	0.0956494	0.923497
AI429214	97.531	-0.298186	0.339435
AI450353	48.0368	0.113262	0.893081
AI462493	446.426	0.0983391	0.879879
AI464131	33.1131	0.0497241	0.972063
AI467606	24.6464	0.101605	0.892068
AI480653	400.65	0.232426	0.367488
AI504432	325.726	0.139455	0.782303
AI506816	1.92817	0.0160178	NA
AI593442	4.09444	0.0581828	NA
AI597468	769.985	0.0842866	0.878247
AI597479	1095.65	-0.0333132	0.9725
AI607873	78.4072	-0.0202685	0.99428
AI661453	76.1338	0.0305495	0.987001
AI662270	73.462	0.240915	0.528385
AI836003	22.6229	-0.0174756	0.99388
AI837181	290.47	-0.0459645	0.973197
AI839979	7.27631	-0.000487932	0.999417
AI846148	695.267	-0.357473	0.0186462
AI847159	0.537159	0.0184381	NA
AI848285	738.521	0.00917611	0.995866
AI854517	157.659	0.0321054	0.98503
AI854703	23.7175	-0.000520861	0.999417
AI987944	410.582	-0.207727	0.453825
AK010878	108.398	0.0480496	0.974994
AK129341	646.317	-0.776538	1.08774e-08
AU015228	15.201	-0.0361088	0.974059
AU015836	5180.98	0.225279	0.0267652
AU018091	7.78377	0.00792058	0.995866
AU019823	1090.85	-0.00952555	0.994891
AU021063	1.04939	-0.014974	NA
AU021092	314.663	0.129988	0.818835
AU022252	237.804	0.0223004	0.990693
AU022751	265.77	0.0706925	0.944026
AU022754	0.905767	0.0131352	NA
AU023871	13.0463	-0.0241543	0.98422
AU040320	965.689	-0.372826	0.00382736
AU041133	167.422	0.25464	0.431838
AV039307	14.035	-0.0858646	0.882549
AV051173	10.6192	-0.105107	0.799259
AW011738	2.43807	0.0498351	NA
AW046200	23.3673	-0.0425479	0.974354
AW112010	23.2073	-0.105064	0.880802
AW146154	185.024	-0.0414351	0.977781
AW209491	639.068	0.101755	0.833785
AW495222	1.1147	0.0224277	NA
AW549542	6.16135	-0.0155004	0.987926
AW549877	2652.56	0.0388554	0.948425
AW551984	26.9698	0.0173889	0.994418
AW554918	465.156	-0.214217	0.393433
AY074887	6.18388	0.0134707	0.989518
AY358078	9.82857	0.0109579	0.994891
Aaas	985.184	-0.135466	0.635601
Aacs	311.548	0.0275479	0.985865
Aadacl3	1.29871	-0.0233943	NA
Aadat	3.31222	0.0177786	NA
Aaed1	462.97	-0.0159081	0.994019
Aagab	2349.22	0.0840076	0.794805
Aak1	967.862	0.0427101	0.961174
Aamdc	426.59	0.140911	0.739127
Aamp	2662.41	-0.321474	0.00546981
Aanat	1.42225	-0.0461695	NA
Aar2	698.751	-0.0309184	0.977466
Aard	29093.2	0.191488	0.0523071
Aars	1878.16	0.0421484	0.948044
Aars2	220.735	-0.0256321	0.988514
Aarsd1	549.206	0.0329223	0.977466
Aasdh	301.961	-0.312793	0.158465
Aasdhppt	1371.82	-0.474894	1.011e-05
Aass	538.544	0.150175	0.70824
Aatf	923.967	-0.0979102	0.828793
Aatk	12.5564	-0.0668658	0.926869
Abat	2552.63	0.080211	0.824321
Abca1	3964.27	0.132764	0.466798
Abca12	38.1458	0.0273224	0.988251
Abca13	17.4719	0.0434288	0.969031
Abca14	1.61089	-0.0265866	NA
Abca15	1.5823	0.031902	NA
Abca16	86.4717	-0.654562	0.000762243
Abca17	61.0448	0.104518	0.910288
Abca2	1471.41	0.174398	0.316462
Abca3	597.432	0.45649	0.0013669
Abca4	44.3078	0.0164024	0.994891
Abca5	1077.39	-0.791972	9.0165e-15
Abca6	193.634	0.0749146	0.944026
Abca7	220.281	-0.0335745	0.983246
Abca8a	68.4874	-0.476492	0.0310892
Abca8b	68.9155	0.00100664	0.999417
Abca9	120.562	-0.0173434	0.994891
Abcb10	746.429	0.0409099	0.968522
Abcb11	0.471853	-0.0126354	NA
Abcb1a	151.817	0.172212	0.747048
Abcb1b	35.251	-0.109311	0.888981
Abcb4	5.48242	-0.0581058	0.893081
Abcb5	23.0894	0.0143221	0.994891
Abcb6	451.763	-0.119747	0.808506
Abcb7	697.367	0.0740958	0.907812
Abcb8	389.965	0.049177	0.965481
Abcb9	44.7189	-0.117804	0.882418
Abcc1	3288.64	0.150687	0.293426
Abcc10	222.255	0.108436	0.888981
Abcc12	12.5168	-0.341839	0.0159841
Abcc2	19.9242	-0.109068	0.853435
Abcc3	39.9644	0.0501836	0.973016
Abcc4	313.209	0.215083	0.498711
Abcc5	1065.15	0.146865	0.544539
Abcc6	3.24936	0.0136226	NA
Abcc8	144.91	0.199706	0.652436
Abcc9	91.9998	-0.0124766	0.995866
Abcd1	161.145	-0.424768	0.0573127
Abcd2	422.653	0.259531	0.284621
Abcd3	4209.34	0.263193	0.011786
Abcd4	71.6823	0.0743233	0.954202
Abce1	4363.24	0.124916	0.459784
Abcf1	3049.9	-0.0151747	0.994891
Abcf2	2233.52	-0.15635	0.445454
Abcf3	1359.53	0.0496389	0.943635
Abcg1	324.064	-0.0456491	0.971776
Abcg2	555.081	0.164008	0.592871
Abcg3	12.6737	0.00336316	0.999288
Abcg4	28.8085	0.111068	0.877379
Abcg5	2.36633	0.0154809	NA
Abcg8	0.883024	-0.00163986	NA
Abhd1	38.5238	0.0350947	0.983106
Abhd10	783.121	-0.0871707	0.874416
Abhd11	652.294	0.131733	0.70745
Abhd12	1542.33	-0.0107294	0.994891
Abhd12b	1.0224	0.00161155	NA
Abhd13	1187.42	0.0347219	0.970749
Abhd14a	187.79	-0.306756	0.266899
Abhd14b	146.389	-0.107914	0.902398
Abhd15	9.07856	0.0959362	0.804708
Abhd16a	669.373	0.0083191	0.995866
Abhd16b	0.813468	-0.00641072	NA
Abhd2	216.694	-0.0580992	0.964611
Abhd3	752.16	0.113895	0.773497
Abhd4	11574.9	0.0787037	0.757463
Abhd5	1072.75	0.0616515	0.926869
Abhd6	989.54	0.100521	0.808627
Abhd8	256.19	-0.268608	0.3131
Abi1	4577.97	0.217748	0.0442763
Abi2	1391.46	0.0254543	0.97846
Abi3	28.3837	0.106618	0.888445
Abi3bp	470.977	0.148528	0.683937
Abl1	1294.06	-0.0966926	0.784077
Abl2	1420.43	0.00040435	0.999417
Ablim1	240.063	0.109915	0.88097
Ablim2	40.5489	0.112221	0.892068
Ablim3	28.3606	0.0185887	0.993961
Abo	21.5162	-0.328162	0.109634
Abp1	1.36827	-0.0186354	NA
Abr	578.194	0.174039	0.53484
Abra	0.570847	0.00173947	NA
Abracl	876.922	0.186157	0.359474
Abt1	593.259	-0.181953	0.496331
Abtb1	421.891	-0.00804644	0.996789
Abtb2	1146.22	-0.0194107	0.987001
Acaa1a	380.809	0.0219306	0.989518
Acaa1b	91.2631	-0.0128718	0.995866
Acaa2	3819.43	0.134252	0.378646
Acaca	649.545	-0.129273	0.730341
Acacb	234.47	0.211069	0.554222
Acad10	77.0399	0.0782391	0.948425
Acad11	833.451	-0.260696	0.108152
Acad12	123.754	0.114291	0.893081
Acad8	966.289	0.154691	0.53031
Acad9	692.386	-0.0627424	0.934004
Acadl	2293.54	0.189162	0.27689
Acadm	1566.71	0.132575	0.537293
Acads	434.839	0.0049479	0.997993
Acadsb	2290.47	0.0404676	0.954458
Acadvl	1220.04	0.0165181	0.988846
Acan	84.0763	0.137207	0.853435
Acap1	32.549	-0.0392194	0.978701
Acap2	1557.66	0.0854844	0.824684
Acap3	357.908	-0.0861688	0.910288
Acat1	2414.82	0.039968	0.948425
Acat2	813.382	-0.0418129	0.963027
Acat3	132.544	-0.0542989	0.97169
Acbd3	1654.4	-0.0587536	0.911715
Acbd4	199.609	0.129953	0.843934
Acbd5	2429.96	0.105767	0.674349
Acbd6	591.533	0.0476875	0.961327
Acbd7	17.7746	0.119422	0.813061
Accs	90.0023	0.122265	0.88588
Accsl	0.813468	-0.00641072	NA
Acd	397.593	-0.0617931	0.948587
Ace	609.522	-0.0796197	0.899876
Ace2	95.8471	0.0401559	0.980778
Acer1	1.77726	-0.040178	NA
Acer2	264.525	0.105721	0.892068
Acer3	1102.2	-0.558242	4.22263e-07
Ache	2.9773	0.0063133	NA
Acin1	4030.82	-0.0936055	0.929441
Acly	7096.34	0.0594414	0.864375
Acmsd	0.44486	9.11659e-05	NA
Acn9	347.45	0.0938597	0.900081
Acnat1	1.72349	-0.0247526	NA
Aco1	1363.97	0.123116	0.637288
Aco2	2694.39	-0.12851	0.462498
Acot1	387.012	0.142799	0.755985
Acot10	125.061	0.0265911	0.989518
Acot11	93.6621	-0.0317943	0.985925
Acot12	5.56861	0.0435074	0.942
Acot13	502.228	0.292643	0.131677
Acot2	110.376	0.296966	0.336551
Acot3	6.48803	0.0439441	0.938231
Acot4	4.43085	-0.0828387	NA
Acot5	14.2326	-0.0605893	0.944026
Acot6	55.7264	-0.107486	0.906175
Acot7	709.641	-0.672184	1.07071e-07
Acot8	168.552	0.00834071	0.997057
Acot9	424.035	-0.0142124	0.994891
Acox1	1061.18	0.0883358	0.845035
Acox2	1.32788	-0.00249308	NA
Acox3	271.604	0.0334543	0.982253
Acoxl	27.3983	-0.0641808	0.955561
Acp1	414.996	-0.0556099	0.958248
Acp2	728.789	0.0583281	0.943635
Acp5	155.784	0.277966	0.365399
Acp6	555.764	0.00141278	0.999417
Acpl2	256.224	0.191112	0.617988
Acpp	44.8646	0.0169888	0.994891
Acr	13.0985	-0.36334	0.0124901
Acrbp	72.258	-0.157576	0.806499
Acrv1	0.9504	-0.0319221	NA
Acsbg1	8166.77	0.00668576	0.995079
Acsbg2	1.46057	0.000961105	NA
Acsf2	183.323	0.138895	0.824995
Acsf3	146.368	-0.1455	0.82121
Acsl1	1059.53	0.0143517	0.991119
Acsl3	2109.09	0.151869	0.363986
Acsl4	2568.64	0.370197	0.000220244
Acsl5	256.118	0.108718	0.882626
Acsl6	707.482	0.0510722	0.957168
Acsm1	0.404477	0.0124042	NA
Acsm3	43.806	-0.0525191	0.971776
Acsm4	1.77056	-0.0404782	NA
Acsm5	5.66436	-0.0322759	0.961174
Acss1	1178.49	0.376331	0.00124629
Acss2	1497.8	-0.553029	1.35289e-08
Acss3	58.5147	0.143697	0.835422
Acta1	11.0429	0.127696	0.701215
Acta2	6015.44	-0.100168	0.715444
Actb	18096.4	0.0638956	0.954053
Actbl2	0.674091	-0.00851858	NA
Actc1	15.3386	0.0175204	0.991119
Actg1	269.438	-0.140664	0.809333
Actg2	126.497	-0.139078	0.842929
Actl10	0.721169	-0.0245996	NA
Actl6a	1974.18	-0.111698	0.645162
Actl6b	2.34359	-0.000725619	NA
Actl7b	9.93749	-0.261691	0.0878802
Actl9	2.85099	-0.0833211	NA
Actn1	307.215	0.0564663	0.961174
Actn2	138.784	0.184735	0.708029
Actn3	357.496	0.0111033	0.995866
Actn4	2636.06	-0.00590164	0.995866
Actr10	2285.32	-0.21089	0.122209
Actr1a	1457.32	-0.264073	0.0653163
Actr1b	910.287	0.0207702	0.985925
Actr2	2003.85	0.204423	0.189703
Actr3	1584.79	0.230127	0.123711
Actr3b	366.119	0.0616324	0.955734
Actr5	281.672	-0.35177	0.0949511
Actr6	1558.75	-0.0487672	0.944026
Actr8	889.431	-0.0707913	0.910907
Actrt2	0.44486	9.11659e-05	NA
Actrt3	2.56857	0.0238182	NA
Acvr1	260.774	0.0194529	0.993422
Acvr1b	424.2	0.0436192	0.970432
Acvr1c	13.4064	0.0271634	0.982253
Acvr2a	844.988	-0.0369696	0.969954
Acvr2b	138.445	0.00584821	0.998233
Acvrl1	240.874	-0.123321	0.855544
Acy1	323.277	0.0816423	0.92441
Acy3	97.9951	0.13171	0.865164
Acyp1	350.703	-0.503167	0.00187706
Acyp2	224.983	0.0740424	0.944026
Ada	46.9989	0.100636	0.912208
Adad1	568.472	-1.41713	6.60092e-31
Adad2	250.199	-0.528803	0.00292363
Adal	512.549	-0.00281176	0.999302
Adam10	3601.68	0.26604	0.0100956
Adam11	55.9475	-0.0209775	0.99388
Adam12	236.931	0.0747031	0.944026
Adam15	482.433	0.109574	0.83548
Adam17	1970.38	0.0672042	0.882859
Adam18	1.9795	-0.0346144	NA
Adam19	167.863	0.0810035	0.943805
Adam1a	51.6341	0.0630315	0.962116
Adam1b	2.61527	-0.0859368	NA
Adam2	159.344	-2.48626	1.54575e-55
Adam21	1.85165	0.0155101	NA
Adam22	174.804	0.0846185	0.939466
Adam23	288.475	-0.0223681	0.989518
Adam28	1.25833	-0.00765918	NA
Adam29	0.438165	0.000258372	NA
Adam3	5.57009	-0.106634	0.635156
Adam30	13.6283	-0.422968	0.00215811
Adam32	23.5128	-0.408166	0.0222424
Adam33	11.361	-0.0522718	0.948425
Adam4	5.32747	-0.0977047	0.680099
Adam5	61.216	-0.869259	5.64684e-07
Adam7	2.30321	0.0160981	NA
Adam8	49.8842	-0.114908	0.892068
Adam9	2016.52	0.171492	0.309943
Adamts1	454.15	0.0842142	0.904965
Adamts10	397.92	0.174731	0.624677
Adamts12	92.3393	0.024461	0.990759
Adamts13	1.29202	-0.0237479	NA
Adamts14	61.8187	0.104953	0.910288
Adamts15	88.1062	-0.105099	0.911792
Adamts16	4.37049	0.0380599	NA
Adamts17	43.6827	-0.102074	0.910073
Adamts18	3.21349	-0.00739603	NA
Adamts19	90.7165	0.0136739	0.995866
Adamts2	381.182	-0.0783512	0.928016
Adamts20	26.7537	0.0279095	0.985925
Adamts3	36.8059	0.0126053	0.995866
Adamts4	27.5486	-0.0858976	0.927464
Adamts5	2651.24	0.0770939	0.834037
Adamts6	82.4633	-0.220553	0.602342
Adamts7	140.307	-0.0662333	0.961066
Adamts8	14.8323	-0.119848	0.794805
Adamts9	832.807	0.158105	0.547744
Adamtsl1	15.9634	-0.00782592	0.996789
Adamtsl2	29.9928	-0.269092	0.324832
Adamtsl3	6.64659	-0.0320891	0.968522
Adamtsl4	106.967	0.0350449	0.98422
Adamtsl5	33.3741	0.0601757	0.961174
Adap1	72.8072	0.0387365	0.982164
Adap2	19.7309	-0.0814499	0.918847
Adar	1127.1	0.0678015	0.899876
Adarb1	482.121	0.0101813	0.995866
Adarb2	0.77978	0.0109642	NA
Adat1	147.151	-0.0472357	0.974994
Adat2	79.9143	0.0224278	0.991895
Adat3	35.3479	-0.113057	0.883554
Adc	118.287	0.00181064	0.999417
Adck1	484.765	-0.0507505	0.961174
Adck2	155.801	-0.0554309	0.968522
Adck3	1118.65	0.0561506	0.939764
Adck4	237.566	-0.248743	0.396974
Adck5	473.325	-0.00296282	0.999302
Adcy1	86.2017	-0.0685607	0.961066
Adcy10	54.8601	-0.040121	0.979977
Adcy2	82.0662	0.0582364	0.968522
Adcy3	258.544	0.115936	0.866911
Adcy4	31.2037	0.0674312	0.951407
Adcy5	148.248	0.0733351	0.951407
Adcy6	227.588	0.0437101	0.974994
Adcy7	721.381	-0.0442887	0.961174
Adcy8	1.7551	0.0310166	NA
Adcy9	301.443	0.183696	0.612345
Adcyap1	2.37728	-0.0177771	NA
Adcyap1r1	67.8619	-0.039045	0.982054
Add1	3706.9	0.138647	0.36416
Add2	57.6126	0.0669333	0.961174
Add3	6591.86	0.0247416	0.969511
Adgb	40.1386	-0.787471	1.88048e-06
Adh1	589.839	0.13496	0.782837
Adh4	128.156	0.149845	0.815991
Adh5	3449.47	0.167047	0.21062
Adh7	5.7818	0.0198781	0.982106
Adhfe1	115.489	-0.058227	0.968522
Adi1	325.926	0.0722858	0.943635
Adig	1.00901	0.00197049	NA
Adipoq	1.11895	-0.0101427	NA
Adipor1	4590.41	0.210112	0.0523815
Adipor2	1973.58	-0.00501336	0.997057
Adk	2752.98	0.0659884	0.892068
Adm	23.2134	0.0764636	0.934004
Adnp	3112.43	-0.0389403	0.948977
Adnp2	807.083	0.0478356	0.959906
Ado	651.235	0.00583177	0.997062
Adora1	3725.33	0.0876064	0.738576
Adora2a	11.7455	0.0578309	0.943476
Adora2b	54.4901	0.167631	0.774852
Adora3	1.70319	-0.00825371	NA
Adpgk	877.338	0.0527486	0.944026
Adprh	1178.96	0.0042492	0.997274
Adprhl1	2.24242	-0.0563433	NA
Adprhl2	332.989	-0.0952207	0.894322
Adprm	297.689	0.0253979	0.987771
Adra1a	0.773085	0.0111477	NA
Adra1b	4.8442	-0.0267988	NA
Adra1d	0.916712	-0.018406	NA
Adra2a	4.55934	0.0440475	NA
Adra2b	12.8051	0.11968	0.74823
Adra2c	31.0277	0.0696336	0.948425
Adrb1	4.07377	-0.0248904	NA
Adrb2	13.3296	-0.0511097	0.955734
Adrb3	4.09592	-0.0943446	NA
Adrbk1	1001.41	-0.0434399	0.958557
Adrbk2	111.984	-0.0543781	0.971776
Adrm1	139.789	0.0373735	0.982253
Adsl	764.016	-0.0123336	0.994891
Adss	2666.83	-0.338312	0.00286318
Adssl1	29.4207	0.00288746	0.999302
Adtrp	3.53454	0.0233796	NA
Aebp1	857.849	0.0659208	0.926869
Aebp2	1755.39	0.0929647	0.780269
Aen	480.865	-0.134654	0.760636
Aes	4711.77	0.134963	0.360566
Afap1	266.649	0.144827	0.787981
Afap1l1	152.447	0.0380344	0.981724
Afap1l2	213.679	-0.0472015	0.974994
Aff1	466.263	0.165978	0.605033
Aff2	134.537	-0.0716133	0.955561
Aff3	350.499	0.127978	0.823176
Aff4	3527.85	-0.119897	0.545144
Afg3l1	911.152	0.0339855	0.9725
Afg3l2	2189.21	-0.0791612	0.823176
Afm	2.13466	-0.00873949	NA
Afmid	186.045	0.171949	0.738332
Afp	165.43	-0.11763	0.884289
Aftph	1803.77	-0.0747436	0.866626
Aga	746.061	0.149276	0.589703
Agap1	710.631	0.0911829	0.864061
Agap2	32.7159	0.0994346	0.905266
Agap3	1280.97	-0.0305806	0.974994
Agbl1	2.37728	-0.0177771	NA
Agbl2	180.535	-0.996232	2.17728e-09
Agbl3	266.586	-0.620708	0.000187445
Agbl4	23.0649	-0.198249	0.543723
Agbl5	600.003	-0.493442	0.000346856
Ager	13.3845	0.0800586	0.894322
Agfg1	1962.43	0.00184902	0.999302
Agfg2	1572.9	0.108488	0.70824
Aggf1	2295.16	0.133907	0.463147
Agk	209.764	-0.112253	0.883494
Agl	768.115	-0.00255576	0.999302
Agmat	1.6628	0.00925032	NA
Agmo	90.8043	0.0422664	0.979509
Ago1	730.364	0.258325	0.164172
Ago2	397.735	-0.218424	0.40574
Ago3	627.607	-0.0546347	0.953042
Ago4	432.479	0.111021	0.846207
Agpat1	1383.14	-0.211306	0.225243
Agpat2	105.035	0.131701	0.864915
Agpat3	1434.86	0.010869	0.994891
Agpat4	1023.13	0.310917	0.0305848
Agpat5	1399.34	0.090798	0.82824
Agpat6	1021.77	-0.0455984	0.957826
Agpat9	9.0803	-0.048395	0.94825
Agphd1	78.9931	-0.000149121	0.999717
Agps	2406.63	-0.00366969	0.997274
Agrn	933.927	0.0345184	0.9725
Agrp	1.84012	-0.0356587	NA
Agt	668.691	0.0231288	0.985925
Agtpbp1	1063.22	-0.121781	0.707514
Agtr1a	30.8894	0.186083	0.651983
Agtr2	140.167	0.0837003	0.94233
Agtrap	1300.13	0.183347	0.324832
Agxt2	0.570847	0.00173947	NA
Agxt2l2	184.217	0.194492	0.645351
Ahctf1	4601.07	-0.011158	0.990759
Ahcy	293.565	-0.100929	0.893081
Ahcyl1	2899.93	-0.128093	0.4676
Ahcyl2	1605.78	0.133852	0.555735
Ahdc1	733.007	-0.0526255	0.948425
Ahi1	707.54	-0.188847	0.403925
Ahnak	1483.34	0.10505	0.759456
Ahr	205.832	0.0730158	0.946299
Ahrr	24.3256	0.0690091	0.944026
Ahsa1	1344.67	-0.0837799	0.843934
Ahsa2	611.165	-0.00811161	0.995866
Ahsg	347.473	0.170196	0.659516
Aicda	0.404477	0.0124042	NA
Aif1	64.4513	0.00144774	0.999417
Aif1l	180.292	0.246753	0.447542
Aifm1	1494.67	0.0861136	0.845885
Aifm2	377.452	0.116584	0.842463
Aifm3	262.92	0.131504	0.821605
Aig1	107.533	0.0974306	0.926869
Aim1	155.294	-0.130148	0.854753
Aim1l	127.758	-0.0158818	0.994891
Aim2	20.1912	0.116849	0.828922
Aimp1	1779.97	-0.000546301	0.999417
Aimp2	771.53	-0.128931	0.715444
Aip	529.437	-0.144688	0.703959
Aipl1	16.3091	-0.0124815	0.994891
Aire	2.35719	-0.0143447	NA
Airn	26.5627	0.0635017	0.954872
Ajap1	9.93023	0.0431818	0.961066
Ajuba	858.39	0.143195	0.591962
Ak1	139.598	0.258841	0.436956
Ak2	1550.29	0.0502522	0.943635
Ak3	1743.72	0.148906	0.503741
Ak4	456.111	0.212207	0.407117
Ak5	18.066	-0.0322908	0.979773
Ak7	135.725	-0.0483032	0.974994
Ak8	50.3479	-0.275372	0.384423
Akap1	685.496	0.112337	0.794805
Akap10	662.845	0.0399975	0.969065
Akap11	3384.05	0.0606893	0.880987
Akap12	7030.27	0.152872	0.266616
Akap13	1659.41	0.0822287	0.85868
Akap14	1.1147	0.0224277	NA
Akap17b	928.151	0.106417	0.782303
Akap2	399.268	-0.0079033	0.996789
Akap3	30.9759	-0.54414	0.00144591
Akap4	4.54323	-0.0591037	NA
Akap5	95.9602	0.0322092	0.985925
Akap6	18.2482	-0.0258817	0.985811
Akap7	853.597	0.223244	0.275403
Akap8	2563.4	-0.0644283	0.887293
Akap8l	1406.04	-0.173126	0.437294
Akap9	3178.44	0.0786772	0.841323
Akip1	380.102	0.0726018	0.939764
Akirin1	2104.53	-0.0276437	0.973327
Akirin2	1751.92	0.0444557	0.944026
Akna	76.425	0.150084	0.82384
Aknad1	1.90543	-3.16299e-07	NA
Akp3	2.08274	-0.0439524	NA
Akr1a1	5861.46	0.0699319	0.807509
Akr1b10	313.701	0.0409616	0.974994
Akr1b3	22.4838	-0.0248814	0.987926
Akr1b7	121.583	-0.0245024	0.990693
Akr1b8	4228.78	0.0986341	0.682376
Akr1c12	3.75926	0.0483843	NA
Akr1c13	68.0178	0.123374	0.878247
Akr1c14	214.137	0.0458667	0.974176
Akr1c19	3.60702	0.0387626	NA
Akr1c21	0.680786	-0.0098401	NA
Akr1cl	3327.5	0.0050587	0.996789
Akr1d1	0.982018	0.0189047	NA
Akr1e1	563.182	0.0423159	0.969065
Akr7a5	880.047	-0.0491667	0.954673
Akt1	2006.32	0.0248115	0.975781
Akt1s1	847.055	0.0392818	0.968522
Akt2	787.082	-0.0874641	0.861744
Akt3	1215.06	0.00813318	0.995866
Aktip	945.214	0.00353682	0.998958
Alad	1682.07	0.163116	0.338897
Alas1	2046.9	-0.192457	0.686592
Alas2	134.971	-0.473659	0.02897
Alb	3.75708	0.0167469	NA
Alcam	1594.35	-0.0732541	0.863944
Aldh16a1	432.922	-0.0941698	0.884413
Aldh18a1	623.539	0.170363	0.536513
Aldh1a1	21772.3	0.0259306	0.964611
Aldh1a2	2072.39	0.0170773	0.985925
Aldh1a3	346.83	0.245914	0.330144
Aldh1a7	686.943	-0.0881323	0.87002
Aldh1b1	1089.21	0.24496	0.116928
Aldh1l1	249.427	0.09165	0.917168
Aldh1l2	18.7407	0.0302468	0.982311
Aldh2	6211.8	0.137828	0.475502
Aldh3a1	153.668	0.0397759	0.979773
Aldh3a2	2385.98	0.126413	0.539969
Aldh3b1	141.777	0.00909588	0.997057
Aldh3b2	0.438165	0.000258372	NA
Aldh4a1	384.992	0.0285162	0.98434
Aldh5a1	469.16	0.227399	0.337035
Aldh6a1	2936.7	0.0450136	0.948425
Aldh7a1	1461.5	0.0539058	0.939323
Aldh8a1	1.57051	-0.0107079	NA
Aldh9a1	1874.54	0.124119	0.590917
Aldoa	4257.83	0.0241573	0.974994
Aldoart1	151.584	0.0371888	0.982106
Aldoart2	16.6036	0.0112557	0.995294
Aldob	2.64907	-0.00460639	NA
Aldoc	234.39	0.17627	0.689567
Alg1	742.968	-0.0525451	0.955561
Alg10b	1369.05	0.124019	0.655609
Alg11	702.118	-0.0395207	0.970749
Alg12	165.961	-0.0393331	0.979773
Alg13	1320.34	-0.12635	0.604965
Alg14	417.696	0.118465	0.816792
Alg2	917.241	0.0860885	0.866911
Alg3	365.624	-0.0174382	0.994418
Alg5	695.3	0.143947	0.6434
Alg6	354.695	0.449994	0.00927564
Alg8	560.246	-0.287223	0.112598
Alg9	438.827	-0.0907759	0.894212
Alk	1.36827	-0.0186354	NA
Alkbh1	277.648	0.0479887	0.9725
Alkbh2	163.138	0.111428	0.892641
Alkbh3	311.225	-0.0243487	0.988484
Alkbh4	112.884	0.0523544	0.973197
Alkbh5	1668.11	-0.022664	0.982054
Alkbh6	477.541	-0.023926	0.985925
Alkbh7	175.722	0.109925	0.893081
Alkbh8	309.724	0.220805	0.4676
Alms1	1295.95	-0.476068	1.23528e-05
Alox12	55.7766	0.128096	0.866515
Alox12b	51.8481	0.0381982	0.982015
Alox12e	1.58655	0.00467359	NA
Alox15	5.09617	-0.022901	0.975476
Alox5	26.1807	0.00510823	0.998361
Alox5ap	91.5984	-0.0080187	0.997062
Alox8	15.7765	0.0198032	0.989518
Aloxe3	49.8962	0.0461235	0.974994
Alpk1	167.87	-0.00840204	0.997057
Alpk2	1.76605	-0.00316596	NA
Alpk3	3.77498	-0.0209281	NA
Alpl	342.959	-0.0898398	0.911372
Alppl2	1.29202	-0.0237479	NA
Als2	917.933	0.151443	0.558302
Als2cl	291.467	0.186778	0.618198
Als2cr11	143.696	-0.584822	0.00268274
Als2cr12	32.8037	-0.91265	1.90329e-09
Alx1	20.2472	-0.575576	8.69094e-05
Alx3	5.1949	0.00155002	0.999302
Alx4	10.1749	-0.0261705	0.979773
Alyref	1956.82	-0.0807206	0.817152
Alyref2	180.099	-0.23377	0.496199
Amacr	289.001	0.11022	0.870921
Ambp	0.438165	0.000258372	NA
Ambra1	837.582	-0.159387	0.51117
Amd1	14.8078	-0.0777671	0.910906
Amdhd1	0.537159	0.0184381	NA
Amdhd2	186.364	0.0339074	0.984021
Amelx	0.471853	-0.0126354	NA
Amer1	428.834	0.173426	0.585785
Amer2	3.21349	-0.00739603	NA
Amfr	4341.18	-0.021421	0.978137
Amh	896.887	-0.251574	0.154488
Amhr2	3881.32	0.136624	0.457665
Amica1	7.04278	0.0255942	0.974994
Amigo1	129.229	0.184597	0.714287
Amigo2	284.753	0.206397	0.52931
Amigo3	26.2441	-0.00720596	0.997062
Ammecr1	881.842	0.0830617	0.876481
Ammecr1l	786.584	-0.15657	0.543393
Amn	12.3436	0.04092	0.968522
Amn1	479.208	-0.353575	0.0432174
Amot	609.926	0.0622626	0.939764
Amotl1	174.609	0.0424875	0.977781
Amotl2	1223.73	0.158267	0.485984
Ampd1	3.02703	0.00516481	NA
Ampd2	922.994	-0.00101543	0.999417
Ampd3	144.933	0.00846202	0.997057
Amph	12.5535	0.208923	0.309622
Amt	28.0619	0.102051	0.894889
Amy1	53.7141	-0.28163	0.375073
Amz1	6.59553	0.00829939	0.994891
Amz2	887.98	-0.224551	0.246987
Anapc1	3934.65	-0.0621052	0.870164
Anapc10	693.229	-0.164924	0.528385
Anapc11	817.744	-0.123559	0.715444
Anapc13	875.535	0.00645367	0.996789
Anapc15	531.023	-0.358661	0.043732
Anapc16	890.067	-0.0943088	0.840647
Anapc2	1553.44	-0.0650213	0.892068
Anapc4	3179.37	-0.0380003	0.951407
Anapc5	5982.26	-0.125757	0.395939
Anapc7	1121.42	0.0520548	0.943635
Ang	22.5536	-0.0260939	0.986481
Ang4	1.04939	-0.014974	NA
Angel1	544.118	-0.22011	0.326945
Angel2	2160.8	-0.229194	0.071782
Angpt1	23.7114	0.0646916	0.948977
Angpt2	95.6304	0.0527376	0.973327
Angpt4	6.76626	0.0681133	0.880802
Angptl1	51.6231	0.082231	0.944026
Angptl2	486.177	-0.0396557	0.97375
Angptl3	0.570847	0.00173947	NA
Angptl4	660.114	-0.072395	0.918296
Angptl6	78.5966	0.135678	0.85655
Angptl7	2.18843	-0.025272	NA
Ank	828.819	0.140783	0.637288
Ank1	20.1766	-0.0168273	0.994019
Ank2	295.084	0.0455533	0.974405
Ank3	529.166	0.132164	0.758586
Ankar	11.6805	-0.346279	0.0127424
Ankdd1b	27.3363	0.065794	0.953042
Ankef1	42.6657	-0.497906	0.0138844
Ankfy1	1736.92	0.114463	0.715444
[truncated: 18,453 more rows]
