# Supplementary material for: The conserved RNA helicase YTHDC2 regulates the transition from proliferation to differentiation in the germline
Source: eLife. 2017 Oct 31;6:e26116. doi: 10.7554/eLife.26116 (PMC5703642; doi:10.7554/eLife.26116)
Supplement: Figure 7—source data 1. [file elife-26116-fig7-data1.xlsx]

## Sheet: Sheet1
Figure 7 - Source Data 1.
Figure 7E. Cyclin A2 protein expression in wild type and Ythdc2-/- leptotene spermatocytes.
		Cyclin A2 Expression Level
	No	Low	High
wild type #1	62	29	0
wild type #2	91	0	0
wild type #3	188	15	0
Total WT Leptotene	341	44	0
Percentage (%)	88.5714	11.4286	0
		Cyclin A2 Expression Level
	No	Low	High
Ythdc2-/- #1	0	26	198
Ythdc2-/- #2	0	0	20
Ythdc2-/- #3	0	4	122
Total Ythdc2-/- Leptotene	0	30	340
Percentage (%)	0	8.13008	92.1409
