# Supplementary material for: The conserved RNA helicase YTHDC2 regulates the transition from proliferation to differentiation in the germline
Source: eLife. 2017 Oct 31;6:e26116. doi: 10.7554/eLife.26116 (PMC5703642; doi:10.7554/eLife.26116)
Supplement: Figure 8—source data 1. [file elife-26116-fig8-data1.xlsx]

## Sheet: P12 YTHDC2 fRIP
Figure 8 - Source Data 1.
YTHDC2 fRIP enriched targets
Gene ID	baseMean	log2FoldChange	padj
Cox8a	2410.9	4.48895	1.44259e-114
Cmpk1	2759.93	2.37164	7.11282e-71
Neto2	3401.13	2.54905	4.64733e-69
Tfam	1922.57	2.64977	5.95919e-67
4833439L19Rik	3876.46	2.09571	5.3794e-59
Suz12	13181.8	2.27276	2.0234e-58
Mettl9	1834.36	2.40608	8.82922e-56
Ctcf	6101.03	2.09733	7.94064e-55
Snx5	4367.07	1.89909	1.72871e-54
Zfp119b	463.156	4.15874	8.1517e-54
Ppp2r5a	1607.85	2.39235	8.56975e-54
Cep76	1310.02	2.80492	5.0142e-51
Trim59	4991.49	2.39851	5.93482e-51
Tmed5	1886.84	3.28063	6.63298e-50
Rrm2b	1761.42	2.3287	6.63298e-50
Sp4	3868.12	2.24084	3.14513e-49
Fbxo8	1014.96	2.47403	1.9617e-48
Pex12	714.614	2.79791	8.81332e-48
Dynlrb1	1370.13	2.8425	4.8877e-47
Rad21	11370.4	1.74279	5.75331e-47
Rfk	1217.9	2.59815	5.84196e-47
Foxj3	5466.84	1.7264	2.10629e-46
Dtl	3089.6	2.0937	2.49358e-45
Cep57	1815.65	2.37775	1.04691e-44
Atf2	6776.36	2.14558	6.63493e-44
Rbm18	1898.97	2.10149	8.05615e-44
Rnf103	1899.19	2.05401	2.17541e-43
Zfp367	2027.72	2.15712	2.85648e-43
Lrrc57	856.465	2.83632	6.26994e-43
Hif1a	7262.45	1.84691	8.63378e-43
E2f6	1675.45	2.26913	9.48285e-43
Fam63b	2601.45	2.32566	1.48162e-42
Spty2d1	2296.27	2.2852	3.70313e-42
1110008F13Rik	1287.17	2.40673	6.85671e-42
Cnih	1429.66	2.26123	1.47132e-41
Smc2	5405.81	1.93911	5.26056e-41
Glud1	2781.83	1.89258	1.1187e-40
Mdh2	3826.03	2.21723	1.6444e-40
Fem1b	3908.24	1.90544	2.15243e-40
Scoc	1193.7	2.68748	4.29659e-40
Atg12	2756.75	1.85556	5.57171e-40
Atxn3	2669.24	1.98879	7.98184e-40
Tceanc	1208.35	2.16705	1.40852e-39
Glce	5916.28	1.66117	8.70018e-39
Mcph1	1697.41	1.9307	1.86285e-38
Hs2st1	2642.79	1.79425	3.04259e-38
Tmem251	547.207	2.94089	5.80486e-38
Fam175b	1465.75	1.91405	1.2814e-37
Cdkn2aipnl	936.133	2.19502	4.69212e-37
Grlf1	8736.71	1.50573	1.87907e-36
Cmas	2145.87	1.80938	3.23346e-36
Wee1	3198.95	1.661	5.49321e-36
Fgfr1op2	3635.69	1.91903	7.72392e-35
Rpl4	13223.3	1.70283	1.09052e-34
Pdpk1	7034.34	1.62279	1.4587e-34
Gid4	3571.16	1.70702	1.51712e-34
Mob4	2146.51	2.01173	1.58724e-34
Cdca5	1039.7	2.4937	4.95103e-34
Slc39a9	3197.71	1.54861	5.01541e-34
Eif5a2	4089.87	1.90379	5.02519e-34
Zdhhc6	1646.74	1.72807	5.75522e-34
Slc22a5	1230.06	2.07412	1.18578e-33
Arf2	2301.25	2.00315	1.76073e-33
Bard1	2184.38	1.72463	4.44701e-33
Tgfbr1	8048.48	1.72686	8.11817e-33
Aph1b	808.161	2.35956	2.07299e-32
Stk38	3594.07	1.59795	6.12141e-32
Gdpd1	1496.6	2.17162	6.29608e-32
Zbtb11	3080.32	1.92322	6.60398e-32
Megf9	1808.42	1.75304	1.02203e-31
Casp3	555.917	2.56667	1.18296e-31
Plagl2	2698.93	1.57161	2.08786e-31
Slc25a25	1704.15	2.28723	2.08894e-31
Slc30a9	4303.56	1.50596	4.56222e-31
Ngly1	1325.39	1.8656	4.88478e-31
Trim44	5877.32	1.33513	1.06065e-30
Ippk	1445.06	1.74354	1.64901e-30
Prkrir	3403.23	1.53591	1.8871e-30
Ankrd46	1272.7	1.86905	2.27496e-30
Crk	5928.74	1.47872	3.31379e-30
Akt3	4704.93	1.43211	3.60468e-30
1810026J23Rik	2347.09	1.6686	6.30328e-30
Nr6a1	2841.62	1.60031	6.30328e-30
Kansl1	9269.02	1.31265	6.30328e-30
Sar1b	960.737	2.04255	6.82399e-30
Ccne1	512.167	2.53861	7.38561e-30
Erlin1	1614.09	1.80871	7.81055e-30
Naa40	4195.19	1.67738	2.63117e-29
Clock	10247.6	1.56803	4.09644e-29
Stam	1916.87	1.65675	6.08087e-29
Herpud2	1515.92	1.7872	8.35034e-29
Pbx3	1419.95	2.1996	1.00385e-28
Chchd4	739.859	2.15816	1.02995e-28
Zfp654	3422.34	2.31566	1.19042e-28
Mtmr10	1576.4	1.60936	2.05357e-28
Triap1	498.793	2.67962	2.10275e-28
Phf6	2135.63	1.61112	2.25324e-28
Gdi2	4782.97	1.40162	5.79086e-28
Rnf11	3745.56	1.68869	6.41132e-28
Fbxo22	1595.58	1.65562	7.22875e-28
Dcun1d2	1180.84	1.78345	7.40396e-28
Cnnm2	897.296	2.1619	7.81027e-28
Magi3	3859.71	1.54208	2.10778e-27
Coq10b	1403.49	1.69289	2.36765e-27
Mtap	929.322	1.95669	2.49629e-27
Otud6b	1872.41	1.68017	3.25621e-27
Fchsd2	4298.92	1.46368	3.25621e-27
Gm4636	1537.71	1.82429	3.73769e-27
Cggbp1	5579.79	2.03656	3.93825e-27
Zfp959	481.84	2.79193	4.67881e-27
Taf5l	1742.69	1.71846	4.67881e-27
1110059E24Rik	622.222	2.24842	4.89872e-27
Slc30a4	5645.66	1.55433	5.75427e-27
AI597479	2205.03	1.56075	6.38759e-27
Golt1b	1552.53	1.57364	7.03474e-27
Cpeb4	2233.07	1.54174	1.28529e-26
Vezf1	4609.59	1.79808	1.95465e-26
Ccdc25	2237.83	1.62382	1.9844e-26
Cox7a2l	1365.1	1.83503	3.78889e-26
Bcl10	979.691	1.74932	4.88478e-26
Pigm	2368.08	1.53485	4.98098e-26
A430005L14Rik	560.873	2.2623	6.46572e-26
Cnep1r1	2478.02	1.64384	6.46572e-26
Gle1	1997.69	1.67181	9.70932e-26
Ppp3cb	4521.79	1.3209	1.06759e-25
1700123O20Rik	712.089	1.9949	1.14661e-25
Csgalnact2	1377.82	1.60586	1.3558e-25
Srpr	2778.39	1.547	1.44161e-25
Zhx3	4256.85	1.29808	1.74717e-25
AU019823	1449.97	1.72597	1.86197e-25
Crkl	2573.48	1.36663	2.00925e-25
Nol11	1846.13	1.5641	2.19245e-25
Rab5a	3748.33	1.77377	2.42694e-25
Pign	5282.66	1.21223	3.30247e-25
Smcr7l	2428.62	1.4328	3.56221e-25
Slc35a5	1383.37	1.76169	5.4267e-25
Fignl1	1622.05	1.55323	6.31988e-25
Kbtbd3	464.49	2.54058	6.79441e-25
Avl9	5191.88	1.23835	6.99406e-25
Ftsjd1	681.909	1.93964	7.47036e-25
Mtdh	4375.49	1.58965	7.86647e-25
Slc30a5	2076.53	1.57342	1.05358e-24
Dek	6568.32	1.57131	1.24537e-24
Abce1	5029.61	1.48742	1.4051e-24
Otud1	534.06	2.4711	1.45191e-24
Nlk	4763.97	1.71096	1.98894e-24
Fbxo45	2371.55	1.48007	2.44703e-24
Lsm1	984.739	1.73577	3.30922e-24
Desi2	2295.75	1.43884	3.48556e-24
Zscan29	1469.71	1.66238	3.54371e-24
Esco1	3821.17	1.75492	3.80037e-24
Azi2	2755.69	1.49355	3.89712e-24
B230219D22Rik	4131.22	1.49554	5.28326e-24
Fam49b	4132.73	1.35955	6.62167e-24
Gm16039	536.381	2.11209	9.87621e-24
Ccdc92	768.06	2.00412	1.08132e-23
Hectd2	2849.06	1.83167	1.08132e-23
Trp53bp2	2036.88	1.40237	1.19377e-23
Vps35	4754.68	1.36398	1.43622e-23
Vta1	968.793	1.84321	1.53547e-23
Shroom2	1281.23	1.64824	2.07586e-23
Zhx1	3060.65	1.38125	2.46974e-23
Rnf115	2847.92	1.52826	2.70501e-23
Suv39h2	1569.24	1.55838	4.82091e-23
Cdca4	1195.6	1.55356	6.58776e-23
Pdik1l	2003.62	1.72737	7.23152e-23
Fam126b	4062.84	1.67533	9.50591e-23
Ints12	814.058	1.91908	1.03802e-22
Naa60	1218.08	1.69459	1.08405e-22
Acvr2a	2125.52	1.71119	1.2295e-22
Gtf3c4	3171.65	1.29553	1.24112e-22
Gpbp1l1	6373.39	1.2622	1.3511e-22
Zc3h6	2225.38	1.54196	1.35664e-22
Polh	887.363	1.83367	1.39001e-22
Slc35a3	2803.09	1.6892	1.47838e-22
Prmt3	1457.73	1.495	1.50431e-22
Cox11	901.179	1.73589	1.75153e-22
Paip2	3705.06	1.39437	2.48663e-22
Mapk1	7312.27	1.23257	2.67533e-22
Map2k1	1341.55	1.7266	2.79492e-22
Mapk14	4327.3	1.36678	3.04622e-22
0610010F05Rik	2650.56	1.45496	3.06358e-22
Slc12a2	5177.92	1.36198	3.63101e-22
Rnf111	4196.58	1.25544	3.99991e-22
Rab10	5225.2	1.23228	4.08709e-22
Tmx4	5667.28	1.31312	4.98093e-22
Spred1	3354.62	1.42696	5.03542e-22
Dazap2	3357.96	1.45064	7.63797e-22
Clcn3	4818.96	1.22023	9.42159e-22
Eri1	2010.62	1.40878	9.84278e-22
Kremen1	1792.05	1.61664	1.04457e-21
Sp3	7400.49	1.54439	1.22503e-21
Ndufa4	1174.85	1.91851	1.2491e-21
Asb1	2108.31	1.49904	1.2491e-21
Lin54	2035.7	1.55112	2.16966e-21
Fam122a	461.614	2.15787	2.47398e-21
uc009cng.2	4022.94	1.18395	2.54684e-21
Arpc1a	3816.79	1.25901	3.18289e-21
Ppp2r5e	3037.63	1.27912	3.76362e-21
Zfp39	1233.45	1.75991	3.77849e-21
Sco1	654.799	1.82919	3.857e-21
Erlin2	3248.2	1.25448	4.03755e-21
Galnt11	1297.89	1.44853	6.36431e-21
Ccdc14	1031.71	1.63203	6.94035e-21
Map2k4	4113.45	1.13633	7.5522e-21
2410004B18Rik	573.791	1.92666	7.88743e-21
Mex3c	5985.14	1.20967	7.88743e-21
Rab33b	1246.3	1.53764	1.03747e-20
Cab39l	1240.77	1.45764	1.18612e-20
Atp6v1c1	1425.71	1.46213	1.31359e-20
Zbtb9	1103.92	1.56882	1.48492e-20
Isca1	867.437	1.60931	1.59446e-20
Slc16a1	4191.86	1.2758	1.59871e-20
Calu	6438.57	1.22646	1.61462e-20
Sys1	589.559	2.47332	1.72549e-20
Ercc6l	873.228	1.76089	1.79113e-20
Fbxl3	4382.36	1.42264	2.46882e-20
Phospho2	1019.33	1.72953	2.61914e-20
Mcts2	395.422	2.31791	2.70785e-20
Nfya	2151.33	1.37073	2.88864e-20
Mgat2	1347.46	1.6165	3.50633e-20
Arcn1	6180.32	1.11684	3.96289e-20
Ankrd13c	2308.85	1.32304	4.70991e-20
Dcp1a	2748.54	1.23923	4.83702e-20
Zbtb2	818.409	1.64165	8.17398e-20
Bcl2l13	1945.94	1.29023	9.04327e-20
Pgam5	1475.14	1.57466	9.15601e-20
Nfyb	1409.04	1.62523	9.2734e-20
Inpp5f	2269.97	1.25643	9.2734e-20
Stk38l	1954.32	1.29686	9.68865e-20
Pex3	1210.94	1.43622	9.76284e-20
Sass6	1014.89	1.85251	9.92328e-20
Fbxo28	2174.59	1.2118	1.15631e-19
Med26	1058.03	1.5775	1.18921e-19
Cyb5r4	1011.16	1.70129	1.21924e-19
Zfp397	2413.38	1.50989	1.22829e-19
Cep170	4786.17	1.27031	1.25128e-19
Prkacb	3175.43	1.305	1.48909e-19
Wipf2	3314.9	1.16836	1.66932e-19
Cttnbp2nl	1607	1.31295	2.05429e-19
Ywhah	3206.07	1.31442	2.15328e-19
Atp2c1	4337.19	1.12236	2.3658e-19
Numb	2667.87	1.22574	2.37296e-19
Lipo1	494.81	2.19858	2.42062e-19
Plekhf2	1440.54	1.656	2.78111e-19
Dcaf10	1709.17	1.42143	2.79572e-19
Zfp568	2419.41	1.2577	2.8153e-19
Slc35f5	1736.27	1.34311	2.9993e-19
Cpd	6894.08	1.0725	3.15238e-19
Sgpl1	12678	1.5452	3.172e-19
Klf10	1952.74	1.38152	3.27624e-19
Txndc11	1097.25	1.47542	3.52188e-19
Gtpbp10	1389.15	1.49602	3.55624e-19
Pkn2	7724.15	1.27098	3.66508e-19
Baiap2l1	567.167	2.23713	3.81162e-19
Cdr2	826.941	1.63736	4.41572e-19
Wdr45b	2125.65	1.34377	4.55055e-19
Eri2	1633.83	1.56402	4.5818e-19
Snap23	1402.26	1.47872	6.71774e-19
Etaa1	1353.68	1.40457	8.17247e-19
Srp72	3703.95	1.42204	8.45553e-19
Rbm7	1742.05	1.39802	8.4965e-19
Luzp1	5058.57	1.34936	8.4965e-19
Abhd13	2068.05	1.20945	1.12284e-18
Cdc25a	3338.84	1.2867	1.23516e-18
Clasp2	5614.36	1.04207	1.23516e-18
Pdcl3	908.75	1.76668	1.37203e-18
Wdr20a	1235.6	1.4068	1.47493e-18
4632434I11Rik	1296.33	1.63405	1.62218e-18
Odc1	2440.01	1.53056	1.66413e-18
Sar1a	3704.31	1.16591	1.71427e-18
Nptn	4289.1	1.39864	1.7327e-18
Zmpste24	1954.95	1.3877	1.7721e-18
Fam117b	3093.24	1.14747	1.88223e-18
Ubxn2a	1082.99	1.70679	1.93722e-18
Ubr7	1884.45	1.36831	2.04226e-18
Rrm2	1232.7	1.54193	2.2867e-18
Ado	1481.07	1.40453	2.57029e-18
Ube3c	4529	1.03085	2.68396e-18
Rbm12	3738.29	1.21472	2.85182e-18
Rprd1b	1604.64	1.29677	3.22059e-18
Nudcd2	629.317	1.9065	3.29717e-18
Nol7	983.768	1.53357	3.54808e-18
Txlna	3963.71	1.13622	3.59113e-18
Fam179b	5847.54	1.20562	3.6854e-18
Casp8ap2	5644.19	1.25398	4.78143e-18
Znrf3	3483.62	1.12265	4.79689e-18
Rps3a1	1496.86	1.5911	5.04124e-18
Kbtbd8	1367.15	1.60813	5.74832e-18
Actr3	4130.81	1.17246	5.78536e-18
Rundc1	978.637	1.59525	6.75575e-18
Mrpl30	655.6	1.73372	7.13221e-18
Fez2	931.172	1.70129	7.13221e-18
Fam168a	3493.53	1.2018	7.34462e-18
Traf3	1358.83	1.34941	8.35493e-18
Gm1564	9376.87	2.93881	1.48734e-17
Hiatl1	3047.62	1.1664	1.84194e-17
Dnajc27	1091.75	1.46791	2.04482e-17
Stt3b	4641.65	1.06091	2.09796e-17
Fhl4	306.722	2.85493	2.18351e-17
Spc25	925.061	1.53907	2.70662e-17
Gen1	899.37	1.51479	2.71442e-17
Rfx7	5884.02	1.12591	2.79484e-17
Dnajb1	1215.84	1.35512	2.83896e-17
Rab28	1177.08	1.38177	2.92515e-17
C78339	1265.5	1.54185	2.98195e-17
Nup50	2206.73	1.22088	3.03946e-17
C330018D20Rik	655.871	1.77868	3.30961e-17
Hus1	1247.98	1.31014	4.0938e-17
Zfp644	7887.63	1.16414	4.54065e-17
BC048403	544.834	1.77294	4.86941e-17
Sh3bgrl2	2288.08	1.16758	5.64509e-17
Rbbp5	2294.3	1.12338	5.71913e-17
Arpc5	3133.12	1.11984	8.21827e-17
Tfcp2l1	1634.3	1.41102	9.21869e-17
Tollip	4084.04	1.14942	9.31058e-17
Pdzd8	5092.6	1.06045	9.58477e-17
Terf2ip	866.555	1.45811	1.0525e-16
Mcm6	3481.61	1.23035	1.13301e-16
Mis18bp1	2429.19	1.40365	1.19526e-16
Cox7b	639.313	2.11587	1.22612e-16
Rps20	2032.43	1.38821	1.31157e-16
Pdlim5	3083.99	1.2488	1.33191e-16
Rnf19b	1732.83	1.38649	1.34492e-16
Rbm46	1864.68	1.41212	1.65824e-16
Ttc19	1925.42	1.24346	1.6614e-16
Zfp655	4707.64	1.14989	1.76267e-16
Narf	1283.98	1.38079	1.76618e-16
Ints5	1431.97	1.57683	1.8825e-16
Zfp507	2738.33	1.07958	1.94501e-16
Pde4dip	1453.12	1.20916	1.94784e-16
Rsbn1	3056.17	1.49724	1.96288e-16
Ppfia1	5932.71	1.0036	1.98628e-16
Phf7	700.753	1.6802	2.07936e-16
9130401M01Rik	781.885	1.60577	2.78637e-16
Gm3604	446.026	1.99699	2.84474e-16
Ddx19a	1004.08	1.44597	3.19516e-16
Pbrm1	11843.5	1.10298	3.26227e-16
Fam83g	682.867	1.79439	3.47409e-16
BC026590	1168.13	1.39653	3.47409e-16
Rnf19a	3574.3	1.191	3.60454e-16
Ppp2r2d	1846.13	1.17401	3.77242e-16
1700066M21Rik	787.971	1.80441	3.77582e-16
Agfg1	3102.86	1.24418	3.94796e-16
Cldn12	1746.98	1.16466	3.9683e-16
Clec16a	1910.62	1.18547	4.08245e-16
Agps	4543.53	1.04938	4.14971e-16
Arhgap5	11186.3	1.22171	5.17674e-16
Rundc3b	1626.03	1.21277	5.44832e-16
Ubiad1	906.425	1.47854	6.24447e-16
Ctbp1	2300.73	1.3027	7.21697e-16
Map3k9	2202.41	1.37901	7.31694e-16
Qser1	5404.71	1.08403	7.81932e-16
Rspry1	2585.73	1.21446	8.39327e-16
Cbfa2t2	2947.8	1.11303	9.83618e-16
Zfyve20	2836.57	1.09747	1.10844e-15
Zdbf2	5593.67	1.43373	1.14261e-15
Zfp808	866.776	1.47636	1.34423e-15
Sirt1	3146.43	1.1751	1.4331e-15
Zfp518a	9703.04	1.30018	1.54285e-15
Kpna4	3908.13	1.19721	2.05306e-15
Etv3	2314.14	1.15492	2.06303e-15
Zbed4	1107.41	1.28552	2.09269e-15
Arhgap12	4856.8	1.06243	2.12788e-15
10-qA3-143	173.387	3.29148	2.15804e-15
Rbm44	1756.58	1.27505	2.27499e-15
Pi4k2a	2036.83	1.16829	2.71313e-15
Lcorl	2002.73	1.5791	2.7407e-15
Osbp	3341.9	1.01434	2.82599e-15
Pak2	5911.62	1.04501	2.93609e-15
Zfp672	1302.43	1.41203	3.00748e-15
Trim52	899.9	1.75656	3.69964e-15
Plk4	2753.82	1.27739	3.70539e-15
Stard7	4042.1	1.04258	3.79029e-15
Txnl1	2220.41	1.11179	3.8875e-15
Usp38	2085.49	1.08559	4.00456e-15
Rnf139	2020.44	1.21662	4.02223e-15
Eif4ebp2	1700.25	1.21457	4.81798e-15
Rb1	4242.28	1.10163	4.9121e-15
Smap1	2413.52	1.22732	5.65118e-15
Adarb1	2235.67	1.45787	6.08109e-15
Sqle	1598.01	1.19696	7.3583e-15
Rnf4	4222.33	1.03596	7.46617e-15
Tmem165	1598	1.26627	7.95261e-15
Zfp712	452.271	1.95747	8.24378e-15
Mzt1	1822.38	1.70665	8.63009e-15
Rheb	1678.07	1.22575	9.28245e-15
Kpna1	2762.04	1.07045	9.5926e-15
Timm9	471.638	1.96003	1.00733e-14
Tada2b	1400.7	1.18238	1.05603e-14
Tmem216	159.556	2.71409	1.21355e-14
Mtmr12	1985.41	1.07558	1.245e-14
Azin1	7968.62	1.07278	1.43129e-14
Hiat1	3025.29	1.06339	1.43465e-14
Zfand4	929.75	1.38017	1.479e-14
Sertad2	3714.77	1.16324	1.50374e-14
Yy1	4030.96	1.30267	1.52128e-14
Wrnip1	1271.37	1.23177	1.57507e-14
Raph1	2031.89	1.13105	1.69672e-14
Zfp60	1441.99	1.2415	1.72752e-14
Elmod2	1951.84	1.19539	1.76435e-14
Gsg2	392.741	1.78458	1.80884e-14
Zfp280b	3041.99	1.02527	2.24638e-14
BC003965	951.396	1.45303	2.27888e-14
Zbtb5	1300.06	1.30151	3.07788e-14
Fastkd2	1128.17	1.26806	3.21739e-14
Aste1	688.958	1.47387	3.29219e-14
Mark3	4694.17	1.03869	3.38628e-14
Ube2j1	1899.74	1.1886	3.42017e-14
Slc25a16	1056.66	1.50171	3.4401e-14
Tusc2	1160.62	1.32434	4.41597e-14
Cmc1	327.755	2.28931	4.63019e-14
Hic2	2165.9	1.2131	4.774e-14
Ythdf2	2082.32	1.07887	4.80595e-14
Rab39	171.958	3.11347	5.07395e-14
Map3k3	3153.83	1.02181	6.10452e-14
Stk40	1504.64	1.43267	6.19447e-14
Gm5141	599.934	1.89469	6.92377e-14
Ell2	853.223	1.4477	7.21485e-14
Nudt5	750.115	1.40573	7.77913e-14
Ulk2	3905.34	1.26051	8.42504e-14
Urb2	2693.47	1.20642	9.02762e-14
Tm9sf2	4933.41	1.07746	9.349e-14
Tesk2	747.108	1.39251	9.92184e-14
Zfp472	422.59	1.74134	1.25504e-13
Ckap2l	1321.75	1.27493	1.26989e-13
Spryd7	924.357	1.45471	1.27464e-13
Tmtc3	3538.69	1.15904	1.29448e-13
Smad4	3462.58	1.02361	1.39359e-13
Adh5	1746.95	1.06502	1.60491e-13
Ptpn4	4445.68	1.10001	1.6173e-13
Gabpa	3458.11	1.16611	1.69884e-13
Rbl1	1740.58	1.20671	1.8389e-13
Cept1	1202.96	1.23675	1.93315e-13
Foxm1	2449.37	1.0717	1.93315e-13
Osbpl2	1689.93	1.21794	1.95253e-13
Zfp622	1258.44	1.37522	2.12632e-13
Rps2	1819.43	1.58473	2.24298e-13
Gemin6	308.021	1.93284	2.25867e-13
Pnpla8	4668.57	1.16909	2.47759e-13
Ankrd49	743.556	1.52959	2.51137e-13
Yod1	1178.44	1.59606	2.62095e-13
Brap	2949.42	1.22761	2.64384e-13
Ercc6l2	3008.84	1.02944	2.65375e-13
Mettl4	1273.91	1.22861	2.76077e-13
Csrnp2	1838.42	1.18487	2.78017e-13
Etfa	1697.43	1.25733	3.05875e-13
Slc35e1	1973.69	1.13855	3.12699e-13
Fam199x	3524.35	1.06553	3.31281e-13
Tmem194	2122.71	1.29866	3.32924e-13
4933427D06Rik	1589.83	1.228	3.39294e-13
Vhl	1993.8	1.16775	3.54771e-13
A230046K03Rik	4346.06	1.06045	3.58711e-13
9130023H24Rik	749.992	1.4452	4.26874e-13
Xrcc2	670.25	1.48704	4.38218e-13
Ccna2	2540.77	1.25808	4.74131e-13
Clint1	2547.77	1.13605	4.97355e-13
D230025D16Rik	1356.84	1.15594	5.04952e-13
Tbl2	2493.02	1.08519	5.30336e-13
Lnx2	921.957	1.26834	5.56668e-13
Asnsd1	1339.45	1.10101	5.93945e-13
Bbs4	751.031	1.41278	5.97545e-13
Apaf1	2370.12	1.09443	6.07212e-13
Fpgt	927.334	1.4968	6.48377e-13
Yme1l1	6277.14	1.06327	6.60039e-13
Chic1	1488.99	1.19258	6.8358e-13
Lrr1	294.56	2.13299	6.86451e-13
Dck	1608.54	1.16485	7.32883e-13
Crebl2	1208.75	1.31037	7.34364e-13
Pde3b	1772.57	1.04629	7.57106e-13
Bcl2l1	1603.56	1.14131	7.91147e-13
Lonp1	2901.22	1.00799	7.91147e-13
Mmgt1	1271.1	1.20354	7.95956e-13
Zfp770	1206.57	1.32116	8.90715e-13
Klhl7	1809.18	1.3246	8.95054e-13
Cenpl	598.257	1.48744	1.0324e-12
Mis18a	696.572	1.44237	1.05436e-12
Ccser2	3882.15	1.03637	1.10088e-12
Pex11a	493.54	1.64967	1.15496e-12
Nudcd1	927.473	1.34375	1.22714e-12
Umps	1281.29	1.38213	1.2288e-12
Cbll1	1493.11	1.48066	1.30889e-12
Kctd6	911.002	1.2925	1.31565e-12
Fbxo33	1357.14	1.24766	1.33366e-12
Ddx19b	2492.28	1.38547	1.36691e-12
Sgol2	1653.92	1.35955	1.4663e-12
Lin9	1097.91	1.35526	1.69417e-12
Ube2q2	1493.75	1.22832	1.74753e-12
Nup62	1864.55	1.04221	1.76009e-12
Gins3	564.691	1.8445	1.84604e-12
Cyld	3975.31	1.05158	2.2743e-12
Tmem48	1617.59	1.1025	2.37697e-12
Dnaaf2	495.739	1.66539	2.38631e-12
Mettl15	220.702	2.26321	2.38816e-12
Glcci1	3735.71	1.07628	2.43948e-12
Lclat1	912.416	1.18888	2.85588e-12
Prps1l3	4092.95	1.0762	2.90745e-12
Tmed8	2096.43	1.02496	2.98208e-12
Ticrr	2080.76	1.02067	3.0459e-12
Naa11	424.615	1.73619	3.11233e-12
Pomt2	1729.46	1.10766	3.25822e-12
Usp1	2669.74	1.06331	3.42374e-12
Erbb2ip	7269.6	1.16354	3.76367e-12
Trpc1	731.005	1.58675	3.82536e-12
Hn1l	1935.35	1.05451	4.20199e-12
Zfp958	916.921	1.4323	4.36719e-12
Dcun1d5	1276.65	1.07812	4.37264e-12
Ncapg2	7816.05	1.03221	4.72415e-12
Cldn25	1340.94	1.10094	5.10244e-12
Bloc1s6	923.169	1.18538	5.19743e-12
Tiparp	2640.18	1.00784	5.223e-12
Ccdc126	318.03	1.80935	5.53488e-12
Usp16	1838.08	1.18573	5.57864e-12
Mrps24	419.242	1.56975	5.61405e-12
4933416C03Rik	552.461	2.0684	5.80224e-12
Gm13718	988.27	1.20269	6.52556e-12
Hmgn2	2363.65	1.12025	6.52874e-12
Ston2	948.676	1.24929	7.03596e-12
Dusp18	346.963	1.76432	7.11695e-12
Pde12	983.269	1.29073	8.20388e-12
Hspe1	1572.06	1.16794	8.21959e-12
Eef1e1	696.136	1.35832	8.60629e-12
Zfp120	520.418	1.49238	8.76088e-12
Mpp6	1689.72	1.0536	8.82331e-12
Zfp81	1054.9	1.33779	9.11142e-12
Nrbf2	413.929	1.70939	9.15258e-12
Ctdspl2	4639.94	1.11287	9.17587e-12
1700030J22Rik	551.187	1.54253	9.29881e-12
Twistnb	1050.76	1.36325	9.29881e-12
Zfand6	2282.19	1.03177	9.31284e-12
Tgs1	2516.59	1.04119	9.57203e-12
C1d	1026.7	1.57763	9.76207e-12
Fbxo48	253.722	2.16307	9.88797e-12
Mesdc2	1809.03	1.06243	1.01495e-11
Lin7c	5647.81	1.17644	1.19545e-11
uc009pcd.1	683.458	1.33718	1.19673e-11
Cyb5d2	324.912	1.76794	1.25465e-11
Gas2	407.558	1.69406	1.26538e-11
Ythdf3	6602.32	1.12905	1.4417e-11
Zbtb10	3783.55	1.30314	1.60674e-11
Nfxl1	3276.76	1.00462	1.68171e-11
Unc119b	1883.26	1.30565	1.8372e-11
Mastl	1191.26	1.28766	1.84476e-11
Fam207a	840.608	1.29148	2.03002e-11
Fam108b	1438.18	1.49009	2.13097e-11
Yars2	467.757	1.49566	2.13206e-11
Ska3	671.306	1.47541	2.24011e-11
Fam220a	707.335	1.32197	2.27789e-11
Rngtt	1967.29	1.04957	2.29959e-11
Zfp322a	1912.17	1.19005	2.30628e-11
Mknk2	3931.89	1.11405	2.31834e-11
Agphd1	555.266	1.45033	2.42928e-11
Socs6	1496.32	1.12265	2.4581e-11
Pdcl	1509.56	1.15763	2.61505e-11
Nipa2	2327.16	1.09301	2.81323e-11
uc007iit.1	2559.37	1.09949	2.83092e-11
Arhgap1	2607.07	1.06175	2.98908e-11
5730507C01Rik	420.801	1.78502	3.04234e-11
Zbtbd6	457.47	1.86421	3.15655e-11
Mob1b	4020.71	1.20014	3.23182e-11
Fam69a	495.688	1.49576	3.23963e-11
Dda1	701.917	1.29311	3.37589e-11
Tmem184c	880.622	1.17091	3.41786e-11
Nptx2	638.326	1.53634	4.04841e-11
Ermp1	1747.26	1.16245	4.21479e-11
Stk17b	1267.24	1.20342	4.2209e-11
Snip1	948.38	1.13296	4.24435e-11
Dmwd	2720.13	1.12352	4.28716e-11
Sephs2	849.552	1.35172	4.29402e-11
Katnbl1	1247.28	1.39489	4.74907e-11
Rnf185	1702.01	1.0206	4.7966e-11
0610009B22Rik	410.646	1.61093	5.0708e-11
Inip	869.614	1.16508	5.17809e-11
Sav1	1714.48	1.20954	5.33281e-11
Dennd6a	2863.38	1.01546	5.39974e-11
Trim36	460.05	1.47792	5.70423e-11
Ilk	2148.75	1.10666	5.8443e-11
Zdhhc7	644.123	1.44571	6.45441e-11
Dsn1	1340.92	1.05042	7.30713e-11
Gmds	533.972	1.43479	7.83407e-11
Sept7	4462.4	1.28133	1.03272e-10
Sh2b3	629.939	1.28874	1.03676e-10
Uqcrfs1	886.827	1.31006	1.10009e-10
Mplkip	812.493	1.44444	1.11396e-10
Slx4ip	712.838	1.31472	1.14425e-10
Aar2	856.973	1.16827	1.18673e-10
Trabd	728.688	1.24241	1.28176e-10
Rbm4b	742.955	1.2301	1.30855e-10
Mpv17l	459.354	1.70545	1.38108e-10
Rbm27	5796.64	1.01586	1.38108e-10
Cpeb2	2415.2	1.0389	1.57408e-10
Lpgat1	2594.11	1.01534	1.64416e-10
Trmt10c	699.696	1.29862	1.70951e-10
1190002N15Rik	1578.38	1.03945	1.73138e-10
Zcchc3	961.537	1.2239	1.83898e-10
Nck1	1109.33	1.10486	2.12667e-10
Zfp746	1111.12	1.05854	2.12667e-10
Ccdc91	861.34	1.13557	2.3961e-10
Zbtb41	4896.46	1.05759	2.46246e-10
Txndc17	642.27	1.27775	2.66326e-10
Dync1li1	1322.27	1.04668	2.66326e-10
Nkiras2	705.715	1.2398	2.84125e-10
Kbtbd4	633.93	1.2503	3.03542e-10
Mrpl10	1013.85	1.13839	3.0885e-10
Taf12	802.598	1.357	3.56805e-10
Phyhipl	393.674	1.66633	3.70007e-10
Swap70	1493.38	1.07137	3.94605e-10
Rab35	1960.87	1.08892	3.98541e-10
Zfp473	291.115	1.85048	4.13255e-10
Tmem129	996.75	1.1706	4.40728e-10
Papolg	2483.29	1.03017	4.86688e-10
Tmem222	729.204	1.44324	5.18136e-10
Nr2f6	518.319	1.36254	5.38235e-10
Trmt5	525.71	1.29679	5.55858e-10
Fam72a	186.961	2.23624	6.63246e-10
Rnf130	1515.78	1.06008	7.16705e-10
Nusap1	995.981	1.28561	7.3452e-10
Dnajb9	1490.93	1.1965	7.34638e-10
Ccdc43	459.364	1.36041	7.62952e-10
Ccrn4l	1120.13	1.04831	8.20379e-10
Dclre1b	495.51	1.31474	8.7186e-10
uc009pca.1	237.525	1.86665	9.46177e-10
Manea	1235.78	1.17809	9.50975e-10
Gdap2	748.474	1.25915	9.61692e-10
Zfp944	814.185	1.1612	9.80909e-10
Pus3	502.666	1.29541	1.03353e-09
Ccdc117	1828.99	1.2268	1.03353e-09
Ripk2	697.817	1.22574	1.05032e-09
Mad2l1bp	179.504	2.02661	1.20823e-09
Lcmt1	753.955	1.16306	1.2564e-09
Txn1	1029.13	1.23681	1.35926e-09
Lysmd3	1271.57	1.33979	1.49014e-09
Zfp719	966.703	1.12254	1.60224e-09
Psmf1	815.548	1.07095	1.60224e-09
9-qA1-178	205.563	2.59186	1.60305e-09
Gna12	2755.43	1.14958	1.72914e-09
uc012cgd.1	887.831	1.1128	1.78696e-09
Fgfr1op	2443.42	1.053	1.98755e-09
Mad2l1	1077.71	1.00877	2.04524e-09
Mrps7	986.695	1.03066	2.21107e-09
Ufm1	1234.91	1.17933	2.57428e-09
6-qF3-3040	1163.13	1.37892	2.65032e-09
Ikzf5	1145.13	1.03668	2.86666e-09
Tbc1d19	983.189	1.05249	3.06861e-09
2810013P06Rik	433.943	1.41298	3.24671e-09
Letmd1	828.24	1.0785	3.55343e-09
Mcat	488.491	1.29528	3.56019e-09
uc009pcc.1	195.806	1.93915	3.66184e-09
9430016H08Rik	386.157	1.41974	3.83344e-09
Fbxl4	793.353	1.13523	4.37486e-09
9430038I01Rik	244.861	1.72696	4.38572e-09
Pknox1	980.131	1.00759	4.46051e-09
Dpy30	663.133	1.26541	4.58345e-09
Atf1	1841.16	1.09322	5.33789e-09
4930453N24Rik	847.026	1.22477	5.44286e-09
Zfp667	712.923	1.17493	5.9363e-09
Errfi1	2415.05	1.03741	6.13331e-09
Ormdl1	557.991	1.39856	6.45548e-09
Fen1	1147.38	1.10288	6.53581e-09
Rnf168	1222.25	1.16303	6.55666e-09
Slc25a33	812.672	1.08712	6.79246e-09
Ccdc36	1242.6	1.00377	6.80867e-09
Yipf5	893.419	1.05727	7.11803e-09
Ppp4r4	932.488	1.1535	7.3734e-09
Rab9b	89.7428	2.7906	7.44061e-09
Haus2	1076.77	1.00245	7.66277e-09
uc009cuu.1	1002.88	1.05996	9.24181e-09
Tsga14	654.024	1.17441	9.60014e-09
Gpsm2	1239.02	1.08246	1.11442e-08
Taf9	2086.98	1.03525	1.22389e-08
Exosc1	1022.83	1.00394	1.2877e-08
Krcc1	1620.69	1.11348	1.31986e-08
Fbxo30	2265.48	1.18527	1.34179e-08
Poglut1	1072.11	1.01702	1.39594e-08
Trove2	1892.61	1.07853	1.41863e-08
Syt11	585.116	1.17407	1.5431e-08
Arhgap33	1119.37	1.07428	1.6532e-08
uc009pcb.1	178.009	2.03879	1.78043e-08
Chmp1b	868.842	1.05587	1.98159e-08
Fbxo10	1220.76	1.0398	2.05136e-08
Smim12	363.107	1.38579	2.16118e-08
Jagn1	521.277	1.19429	2.19005e-08
Rdh14	408.001	1.37993	2.21838e-08
guttman:linc1434.3	496.416	1.3383	2.23131e-08
Zswim1	423.937	1.28931	2.36611e-08
Panx1	358.546	1.49773	2.59036e-08
Peli1	1432.44	1.00393	2.59281e-08
Ccne2	2304.55	1.11339	2.67459e-08
Q6NXM5	777.017	1.06792	3.40866e-08
Ccdc96	129.167	2.95249	3.83205e-08
Myt1l	398.283	1.37452	4.48809e-08
Mei4	296.438	1.51967	4.5048e-08
Q8BNK1	604.436	1.07901	4.76722e-08
Rap1a	1001.17	1.24214	4.83938e-08
guttman:linc1394.3	720	1.14625	5.05139e-08
Fbxo47	639.048	1.22272	5.22191e-08
Med30	386.512	1.35768	5.67183e-08
Enpp4	1126.14	1.02752	5.81699e-08
Tmem43	883.745	1.01297	5.8713e-08
Lrp12	713.875	1.13943	6.0125e-08
Mreg	639.282	1.12873	6.19593e-08
Thap6	709.706	1.07091	6.21663e-08
Tgds	634.784	1.06767	6.66155e-08
Cisd1	360.024	1.44117	7.78083e-08
Q9D4F3	862.452	1.08754	8.37822e-08
Thap1	480.864	1.40696	8.87921e-08
Aph1c	202.643	1.77378	9.04918e-08
Mrpl43	713.033	1.09357	9.90399e-08
Tmem56	544.418	1.21857	9.9716e-08
Exosc4	418.123	1.33978	1.03829e-07
Glyctk	232.115	1.6903	1.0391e-07
Fam58b	261.097	1.48291	1.14619e-07
Zbtb26	1159.45	1.12909	1.19312e-07
Tmem243	267.843	1.53271	1.21621e-07
Nrip3	698.762	1.22837	1.23982e-07
LOC106740	487.108	1.20075	1.31895e-07
Slc39a3	798.545	1.02468	1.31895e-07
Cdkl2	1549.33	1.08037	1.33359e-07
Zfp758	827.29	1.36378	1.35372e-07
Tchh	123.85	2.29211	1.37867e-07
D1Pas1	1277.06	1.20374	1.37999e-07
guttman:linc1293.3	306.026	1.52632	1.5069e-07
Jrk	700.595	1.02159	1.57927e-07
Fam103a1	743.425	1.31165	1.58825e-07
Gm11837	252.291	2.2617	1.8961e-07
Tfb2m	386.409	1.27888	1.92109e-07
Fam53b	1081.03	1.05948	1.92109e-07
Zfp41	890.332	1.05965	1.95512e-07
Bid	710.045	1.05612	2.01448e-07
Zfp128	257.354	1.45349	2.08798e-07
Clp1	404.476	1.20281	2.11161e-07
Rbmxl2	290.957	1.41948	2.72657e-07
Isca2	543.358	1.09238	2.76689e-07
Relt	260.441	1.624	2.8084e-07
Slc17a5	362.324	1.25735	2.93268e-07
Ttc32	161.222	1.91566	3.03278e-07
Kctd7	328.756	1.51151	3.48128e-07
Pigh	541.408	1.08781	3.48905e-07
Rab43	1979.11	1.04075	3.65644e-07
Hist1h1t	721.737	1.11661	3.8215e-07
Zfp938	313.324	1.51217	4.04892e-07
Mrpl17	737.758	1.02446	4.15683e-07
uc008rph.1	211.336	1.77177	4.29917e-07
uc011yqk.1	82.629	2.68583	4.72694e-07
Ube2j2	452.224	1.13459	5.39719e-07
Papolb	186.472	1.82048	6.07898e-07
Fam107b	561.504	1.04779	6.1144e-07
Arl6	467.244	1.2403	6.12266e-07
Lin52	544.001	1.10855	6.99953e-07
Zfp235	400.726	1.19206	7.27066e-07
Elovl4	104.356	2.08655	8.20518e-07
Celf4	176.94	1.8426	8.42969e-07
Tmem60	344.408	1.33496	8.55858e-07
uc009mlj.1	357.291	1.37089	9.31191e-07
Mlc1	345.876	1.56053	9.49041e-07
Scamp4	797.838	1.04521	1.02895e-06
Zfp689	208.762	1.56822	1.06169e-06
Slc22a21	767.699	1.1018	1.17498e-06
Loh12cr1	338.565	1.27008	1.18811e-06
Gabarapl2	476.589	1.19032	1.28167e-06
2810408M09Rik	412.992	1.15733	1.35476e-06
Cutc	338.581	1.33195	1.41635e-06
Zfp934	391.577	1.25745	1.43049e-06
Rassf7	273.304	1.59697	1.4933e-06
Ccdc122	448.671	1.15889	1.61664e-06
Wdr89	188.34	1.58492	1.69071e-06
Tigd3	257.541	1.42956	1.7371e-06
Ngrn	531.593	1.04571	1.75846e-06
Cdc34	1089.7	1.05358	1.7756e-06
Gm527	467.235	1.18516	1.82e-06
Slc16a10	575.343	1.12494	1.82e-06
Cep57l1	526.012	1.12224	1.84303e-06
Zfp868	729.389	1.00648	2.09479e-06
Tppp	333.045	1.29213	2.29932e-06
Mkks	540.976	1.01194	2.50132e-06
Ginm1	599.956	1.02658	2.70265e-06
Efnb2	564.1	1.00502	2.85711e-06
Pdha2	178.048	1.90108	3.06463e-06
4921524J17Rik	651.445	1.31089	3.31366e-06
Rmdn3	840.01	1.01887	3.4575e-06
D6Wsu163e	354.801	1.17502	3.77978e-06
Zglp1	191.973	1.758	3.8012e-06
Poc1b	318.996	1.22912	3.81779e-06
Zswim3	557.698	1.03295	3.85299e-06
Zfp708	249.781	1.34415	4.00592e-06
Nsl1	462.529	1.06043	4.59984e-06
Gemin7	337.063	1.23253	4.60021e-06
Exosc3	348.396	1.15469	4.9116e-06
Wbp2nl	170.801	1.63748	5.32484e-06
Ripk4	441.738	1.06674	5.41942e-06
C77080	706.868	1.01532	5.55156e-06
uc009dil.1	71.8543	2.98297	5.83016e-06
Plcxd2	210.497	1.5189	5.96431e-06
D430020J02Rik	371.113	1.16967	6.21363e-06
Spaca1	58.0919	2.83365	6.40436e-06
Samd10	343.581	1.24263	6.87756e-06
Gpr160	167.169	1.79407	7.0654e-06
Tnfaip8	200.68	1.51695	7.51042e-06
Vkorc1l1	531.275	1.20652	7.92846e-06
Mtfp1	151.651	1.73308	8.12675e-06
Rpp25l	262.24	1.36034	8.30709e-06
uc007tos.1	114.636	2.03834	9.23116e-06
Zfp943	740.246	1.00015	9.44788e-06
Ears2	447.25	1.04958	1.06754e-05
Pet2	1106.44	1.07688	1.13187e-05
Spata7	459.471	1.06376	1.15733e-05
E2f2	451.842	1.04981	1.23885e-05
4921507P07Rik	246.871	1.41215	1.2438e-05
Atp5s	280.595	1.24862	1.46543e-05
Nsun3	297.917	1.19211	1.52171e-05
Prkab1	372.446	1.07011	1.54501e-05
Sox30	230.618	1.64016	1.89395e-05
Efcab11	273.712	1.21595	1.99553e-05
Ier5	388.36	1.10735	2.03835e-05
6-qC3-2394	115.875	2.25479	2.05194e-05
1700049G17Rik	643.102	1.11178	2.07038e-05
AI597468	2253.39	1.57009	2.24985e-05
Eif2s3x	353.685	1.10224	2.25337e-05
Usmg5	417.474	1.23814	2.25379e-05
Sac3d1	226.901	1.29996	2.42711e-05
Ccdc73	763.309	1.12357	2.631e-05
Swsap1	308.966	1.13904	2.74423e-05
4930524B15Rik	318.154	1.43806	3.12058e-05
Cdkn2c	317.506	1.15878	3.21676e-05
Gpr155	246.313	1.28389	3.43984e-05
Lyrm4	375.415	1.01819	3.59557e-05
Msra	202.907	1.37185	4.10936e-05
A130010J15Rik	391.785	1.1042	4.21736e-05
Mocs3	118.586	1.77379	4.30273e-05
Pou6f1	686.692	1.07071	5.03264e-05
Gm5801.2	402.589	1.01357	5.347e-05
Fam46d	871.867	1.03769	5.36079e-05
Mrpl32	417.6	1.06468	5.74113e-05
4930579G24Rik	331.615	1.17034	6.26746e-05
Mtl5	687.702	1.23878	7.105e-05
Atp5e	520.454	1.01756	7.17364e-05
Qpctl	272.857	1.13679	7.30177e-05
Map10	384.453	1.24577	7.36504e-05
Magea10	264.727	1.14401	8.00588e-05
Zfp2	257.452	1.13635	8.6726e-05
Setd6	315.565	1.05976	8.73265e-05
Zfp433.2	84.5677	2.02807	0.000106053
Slc10a3	313.23	1.09633	0.000115387
Fos	118.296	1.63683	0.000121377
uc009pbz.1	232.043	1.26241	0.000131911
Zfp119a	340.817	1.06669	0.000132242
Q8C9J1	282.4	1.11204	0.000137131
Pcdh17	252.672	1.37203	0.000137181
Sgtb	373.491	1.03606	0.00014104
Dap	298.037	1.13821	0.00015048
4930524L23Rik	83.9241	2.01519	0.000166947
Nup35	355.109	1.02493	0.000167004
Aqp11	91.0019	1.88097	0.000169347
Nefh	275.204	1.13807	0.000169687
C230052I12Rik	173.202	1.2861	0.00018474
Spdya	551.988	1.09955	0.000195202
Aspa	173.747	1.59868	0.000198388
Mfsd7b	178.051	1.32338	0.000226312
Fam154b	151.494	1.45413	0.000226635
Ficd	188.575	1.30025	0.000227687
Sec1	279.666	1.04873	0.000228124
Syn2	297.043	1.18637	0.000241406
Hexim2	172.695	1.27048	0.000248391
Dusp22	343.649	1.01949	0.000268653
Zfp637	241.929	1.12743	0.000275272
Dapk2	236.308	1.16171	0.000338128
Nubpl	244.921	1.09086	0.00033991
AI987944	589.459	1.97082	0.000351645
Nr4a3	119.558	1.51014	0.000357633
Tmem246	374.669	1.02356	0.000370194
March3	235.182	1.21005	0.000375268
Zfp786	264.595	1.08559	0.000376586
Q8C7B9	251.204	1.20744	0.000377451
Mrp63	323.029	1.03155	0.000415901
Dusp5	108.229	1.60455	0.00043542
Cyb561d2	228.267	1.15651	0.000453582
Sdhaf1	166.799	1.2313	0.000473208
Cenpw	254.686	1.09301	0.000475333
Magea4	177.053	1.34409	0.000481336
Dolk	329.117	1.01474	0.00051788
Zfp42	120.119	1.45317	0.000522551
Lrp11	146.201	1.36183	0.000523381
Znhit2	150.235	1.39124	0.000524568
2610020C07Rik	190.238	1.18059	0.000584355
1810019J16Rik	168.222	1.36098	0.000600028
Srgap1	272.216	1.07273	0.000603293
Rad51ap2	636.23	1.98265	0.000612839
Sord	243.083	1.03054	0.000714355
Spesp1	66.6415	2.54665	0.000715566
Naif1	131.579	1.36255	0.000717321
Apitd1	277.805	1.09146	0.000783528
2310009A05Rik	132.293	1.44635	0.000788082
Gm4890	252.117	1.0401	0.00084242
2610305D13Rik	287.542	1.24657	0.000919482
AI854517	217.405	1.04282	0.000926037
Paqr3	203.321	1.11961	0.00104336
Hist1h2aa	5589.89	1.77201	0.00106415
Zfp97	177.059	1.16173	0.00120574
Rimbp3	95.2007	1.57399	0.00123971
Sec11c	289.542	1.06362	0.00128481
Znrd1as	107.152	1.52182	0.00135976
E130012A19Rik	112.849	1.38782	0.00140751
2810002D19Rik	169.456	1.23125	0.00141316
Mybl1	2137.82	1.43861	0.00144707
Tmem28	73.6311	1.77634	0.0015257
Ap4s1	231.659	1.06269	0.00166071
Slc22a23	105.597	1.40614	0.00166608
Magea5	174.539	1.18487	0.00169978
Zfp433	66.0005	1.92923	0.00183081
Mettl18	123.275	1.29404	0.00193807
Pramel3	268.454	1.04014	0.00197051
Rpp38	143.863	1.25474	0.00201944
Grhl2	214.107	1.04261	0.0020412
Ddx28	216.714	1.05145	0.0020456
Pparg	151.915	1.37048	0.00219583
BC049762	65.0958	1.81703	0.00228586
Pemt	127.839	1.27629	0.0023682
Pars2	297.136	1.02154	0.00241187
Ttc30b	231.669	1.08429	0.00255127
Magea8	207.342	1.02771	0.00256197
1-qC1.3-637	258.947	1.18966	0.00279405
Dnajc30	187.687	1.05044	0.00282292
uc007tlp.1	135.065	5.0626	0.00299916
Disp2	55.8147	2.24831	0.00302039
Lrriq3	141.429	1.40031	0.00312002
Fam160a1	184.703	1.08497	0.00312002
uc011yfx.1	198.424	1.07463	0.0033197
4933425L06Rik	107.581	1.42559	0.00349304
uc009fwf.1	188.683	1.04049	0.00389868
uc009qbc.1	77.9092	1.60088	0.00492279
Coa6	164.185	1.14233	0.00498056
Hist1h2ag	156.002	1.54409	0.00516027
Pabpc6	115.942	1.51252	0.0055022
Zfp781	112.415	1.21064	0.00565781
BC049715	67.8965	1.68644	0.00597299
H2afx	3355.9	1.16965	0.00674796
Cabyr	67.5666	1.55691	0.00693673
Magea3	131.977	1.3018	0.00752465
Abcb9	126.154	1.12954	0.00759262
Ica1l	141.224	1.19775	0.00780038
Opn3	142.642	1.09331	0.00785642
Mesp2	77.2777	1.38075	0.00831406
Kdm4d	139.352	1.20238	0.00837383
Lnp	3267.05	1.05982	0.00839044
H2bfm	101.949	1.33464	0.00844357
Zfp747	161.921	1.06963	0.00871102
Magea6	113.232	1.1643	0.0088633
Elavl4	89.5371	1.34808	0.00889954
Dusp2	90.3927	1.31088	0.00895659
5-qG3-23659	401.827	3.99632	0.0101066
1810043H04Rik	178.22	1.1009	0.0102743
uc009jdo.1	57.9389	1.92047	0.0104465
11-qE1-252	86.5974	1.83546	0.0114666
G630025P09Rik	58.9381	1.55286	0.012676
Q8C1U6	82.545	1.27222	0.0138341
Magea2	62.8429	1.47386	0.016034
uc012eci.1	83.4366	1.25697	0.0161093
Trpd52l3	55.7556	1.73481	0.0163037
Adora2b	69.5716	1.35097	0.0193544
Fbxl15	88.3792	1.30564	0.0210428
Dnajb3	83.2719	1.32738	0.0216032
Lrrc51	134.37	1.00638	0.0229912
Lrrc46	57.9841	1.5096	0.0293396
Hormad1	1214.38	1.05364	0.0299287
Cers3	107.901	1.61409	0.0329088
Lgr6	64.0274	1.41779	0.0337072
Smim3	82.9932	1.07977	0.0352728
Fam167a	93.1042	1.09043	0.0357021
Rbm11	93.1042	1.05283	0.0392368
1700020N01Rik	111.137	1.50225	0.0394796
uc008qis.1	70.316	1.17478	0.0411799
Znf41-ps	80.8757	1.18476	0.0420417
Rtn1	63.0422	1.28546	0.0484362
