# Supplementary material for: The conserved RNA helicase YTHDC2 regulates the transition from proliferation to differentiation in the germline
Source: eLife. 2017 Oct 31;6:e26116. doi: 10.7554/eLife.26116 (PMC5703642; doi:10.7554/eLife.26116)
Supplement: Figure 8—source data 2. [file elife-26116-fig8-data2.xlsx]

## Sheet: Sheet2
Figure 8 - Source Data 2.
Figures 8B and 8E. Validation of YTHDC2-bound RNAs by fRIP-qRT-PCR from P12 testes.
Ccna2	% Input	Standard Deviation
fRIP YTHDC2 wt-1	2.87742	0.100765
fRIP IgG wt-1	0.114727	0.307906
fRIP YTHDC2 wt-2	2.71362	0.0248235
fRIP IgG wt-2	0.0775802	0.161557
fRIP YTHDC2 -/-	0.540045	0.0597989
Meioc	% Input	Standard Deviation
fRIP YTHDC2 wt-1	9.42196	0.244459
fRIP IgG wt-1	0.114896	0.246973
fRIP YTHDC2 wt-2	10.5081	0.0262127
fRIP IgG wt-2	0.0877027	0.10094
fRIP YTHDC2 -/-	0.785235	0.0560206
17-qA3.3-27363.1	% Input	Standard Deviation
fRIP YTHDC2 wt-1	38.3178	0.205813
fRIP IgG wt-1	0.502585	0.44762
fRIP YTHDC2 wt-2	58.6157	0.0649986
fRIP IgG wt-2	0.347738	0.390376
fRIP YTHDC2 null-1	1.91904	1.54763
Rpl7	% Input	Standard Deviation
fRIP YTHDC2 wt-1	1.46324	0.170567
fRIP IgG wt-1	0.241841	0.17566
fRIP YTHDC2 wt-2	1.41203	0.0307846
fRIP IgG wt-2	0.163214	0.0411504
fRIP YTHDC2 -/-	0.360333	0.0190108
Hprt	% Input	Standard Deviation
fRIP YTHDC2 wt-1	1.65075	0.0945714
fRIP IgG wt-1	0.207469	0.11625
fRIP YTHDC2 wt-2	1.42849	0.0915627
fRIP IgG wt-2	0.127261	0.127551
fRIP YTHDC2 -/-	0.426216	0.0775242
