# Supplementary material for: The conserved RNA helicase YTHDC2 regulates the transition from proliferation to differentiation in the germline
Source: eLife. 2017 Oct 31;6:e26116. doi: 10.7554/eLife.26116 (PMC5703642; doi:10.7554/eLife.26116)
Supplement: Figure 8—source data 3. [file elife-26116-fig8-data3.xlsx]

## Sheet: Sheet2
Figure 8 - Source Data 3.
Figure 8C. Analysis of expression levels of YTHDC2-bound RNAs by qRT-PCR in P12 wild type and Ythdc2-/- testes.
	wild type #1	wild type #2	wild type #3	Ythdc2-/- #1	Ythdc2-/- #2	Ythdc2-/- #3
Ccna2	0.973349	0.944373	1.08789	1.54215	1.41798	1.60988
Meioc	0.849456	0.970578	1.21292	0.885318	0.794711	0.970769
17-qA3.3-27363.1	0.687207		1.12618	0.0154147	0.0161465	0.0223338
			SEM	SEM
	Avg. wild type	Avg. Ythdc2 -/-	wild type	Ythdc2 -/-
Ccna2	1.00187	1.52334	0.0438683	0.0562575
Meioc	1.01098	0.883599	0.106976	0.0508912
17-qA3.3-27363.1	0.906695	0.017965	0.220143	0.00219719
