# Supplementary material for: The conserved RNA helicase YTHDC2 regulates the transition from proliferation to differentiation in the germline
Source: eLife. 2017 Oct 31;6:e26116. doi: 10.7554/eLife.26116 (PMC5703642; doi:10.7554/eLife.26116)
Supplement: Supplementary file 1. [file elife-26116-supp1.xlsx]

## Sheet: Sheet1
Supplementary File 1.
Breeding data for Ythdc2 heterozygous (Ythdc2+/-) mice showing that Ythdc2 null mutant mice are born at the expected Mendelian ratio.
			Pups Genotype:
Breeders (Female x Male)	DOB	# pups	Heterozygous	wildtype	Homozygous
ythdc2 +/- #12 x ythdc2 +/- #10	2012-11-13	6	3	2	1
ythdc2 +/- #40 x ythdc2 +/- #30	2012-12-23	7	5	0	2
ythdc2 +/- #25 x ythdc2 +/- #30	2013-01-24	4	3	1	0
ythdc2 +/- #14 x ythdc2 +/- #10	2013-02-02	4	1	2	1
ythdc2 +/- #40 x ythdc2 +/- #30	2013-02-10	9	5	0	4
ythdc2 +/- #25 x ythdc2 +/- #25	2013-03-13	5	2	2	1
ythdc2 +/- #64 x ythdc2 +/- #69	2013-03-23	8	5	2	1
ythdc2 +/- #40 x ythdc2 +/- #68	2013-04-01	7	1	2	4
ythdc2 +/- #84 x ythdc2 +/- #69	2013-05-06	6	3	3	0
ythdc2 +/- #73 x ythdc2 +/- #68	2013-05-12	8	4	2	2
ythdc2 +/- #76 x ythdc2 +/- #87	2013-05-15	8	6	2	0
ythdc2 +/- #64 x ythdc2 +/- #87	2013-05-16	6	1	4	1
ythdc2 +/- #46 x ythdc2 +/- #71	2013-05-20	5	2	2	1
ythdc2 +/- #40 x ythdc2 +/- #75	2013-05-26	5	2	0	3
ythdc2 +/- #90 x ythdc2 +/- #87	2013-06-01	6	3	2	1
ythdc2 +/- #82 x ythdc2 +/- #87	2013-06-19	7	5	1	1
ythdc2 +/- #126 x ythdc2 +/- #118	2013-08-31	5	2	1	2
ythdc2 +/- #161 x ythdc2 +/- #114	2013-09-05	7	3	2	2
ythdc2 +/- #124 x ythdc2 +/- #118	2013-09-06	7	4	3	0
ythdc2 +/- #174 x ythdc2 +/- #135	2013-09-20	5	3	0	2
ythdc2 +/- #74 x ythdc2 +/- #118	2013-09-23	8	5	1	2
ythdc2 +/- #90 x ythdc2 +/- #114	2013-09-24	6	1	2	3
ythdc2 +/- #124 x ythdc2 +/- #114	2013-10-22	6	2	2	2
ythdc2 +/- #126 x ythdc2 +/- #114	2013-10-24	7	3	3	1
ythdc2 +/- #161 x ythdc2 +/- #114	2013-10-25	7	5	1	1
ythdc2 +/- #233 x ythdc2 +/- #118	2013-11-14	7	4	2	1
ythdc2 +/- #74 x ythdc2 +/- #135	2013-11-15	5	2	2	1
ythdc2 +/- #97 x ythdc2 +/- #114	2013-11-18	5	2	1	2
ythdc2 +/- #225 x ythdc2 +/- #114	2013-11-19	8	7	1	0
ythdc2 +/- #130 x ythdc2 +/- #135	2013-11-23	6	2	3	1
ythdc2 +/- #132 x ythdc2 +/- #114	2013-11-26	7	5	1	1
ythdc2 +/- #126 x ythdc2 +/- #114	2013-12-09	9	3	4	2
ythdc2 +/- #233 x ythdc2 +/- #280	2014-01-05	5	4	1	0
ythdc2 +/- #225 x ythdc2 +/- #114	2014-01-09	8	3	2	3
ythdc2 +/- #124 x ythdc2 +/- #280	2014-01-14	8	4	1	3
ythdc2 +/- #303 x ythdc2 +/- #280	2014-02-04	5	2	1	2
ythdc2 +/- #329 x ythdc2 +/- #280	2014-02-21	4	0	1	3
ythdc2 +/- #309 x ythdc2 +/- #280	2014-03-13	5	2	2	1
ythdc2 +/- #329 x ythdc2 +/- #346	2014-03-25	7	5	1	1
ythdc2 +/- #309 x ythdc2 +/- #280	2014-05-06	5	3	2	0
ythdc2 +/- #399 x ythdc2 +/- #426	2014-07-21	6	4	1	1
ythdc2 +/- #427 x ythdc2 +/- #441	2014-08-31	6	1	1	4
ythdc2 +/- #427 x ythdc2 +/- #453	2014-10-22	8	2	3	3
		Ratio	0.490842	0.263736	0.245421
		Percentage	49.0842	26.3736	24.5421
