# Supplementary material for: The conserved RNA helicase YTHDC2 regulates the transition from proliferation to differentiation in the germline
Source: eLife. 2017 Oct 31;6:e26116. doi: 10.7554/eLife.26116 (PMC5703642; doi:10.7554/eLife.26116)
Supplement: Supplementary file 2. [file elife-26116-supp2.xls]

## Sheet: Breeding male Ythdc2 mutants 
Supplementary File 2.
Breeding data for Ythdc2 homozygous mutant (Ythdc2-/-) mice showing that Ythdc2-/- mice are infertile.
Breeding Ythdc2 -/- males:
		Date Cross	Date Cross		Female
Male	Female	Set up	Taken down	Plugs	Pregnant?
ythdc2 -/- #52	ythdc2 +/- #64	2013-02-01	2013-02-15	2/2/13 & 2/14/13	NO
ythdc2 -/- #52	ythdc2 +/- #46	2013-02-01	2013-02-15	2013-02-06	NO
ythdc2 -/- #52	wild type #62	2013-02-15	2013-06-24	2013-02-18	NO
ythdc2 -/- #52	wild type #63	2013-02-15	2013-06-24	2013-03-08	NO
ythdc2 -/- #49	ythdc2 +/- #61	2013-02-01	2013-02-15	2013-02-05	NO
ythdc2 -/- #49	ythdc2 +/- #59	2013-02-01	2013-02-15	2013-02-08	NO
ythdc2 -/- #49	wild type #55	2013-02-15	2013-06-24		NO
ythdc2 -/- #49	wild type #58	2013-02-15	2013-06-24		NO
ythdc2 -/- #88	wild type #77	2013-04-19	2013-08-22	2013-04-25	NO
ythdc2 -/- #88	wild type #78	2013-04-19	2013-08-22		NO
ythdc2 -/- #79	wild type #10	2013-04-19	2013-08-22	2014-05-03	NO
ythdc2 -/- #79	wild type #72	2013-04-19	2013-08-22		NO
ythdc2 -/- #106	wild type #95	2013-06-03	2013-09-30		NO
ythdc2 -/- #106	wild type #105	2013-06-03	2013-09-30		NO

## Sheet: Breeding female Ythdc2 mutants
Supplementary File 2.
Breeding data for Ythdc2 homozygous mutant (Ythdc2-/-) mice showing that Ythdc2-/- mice are infertile.
Breeding Ythdc2 -/- females:
		Date Cross	Date Cross
Female	Male	Set up	Taken down	Pregnant?
ythdc2 -/- #65	ythdc2 +/- #71	2013-02-18	2013-04-22	NO
ythdc2 -/- #66	ythdc2 +/- #71	2013-02-18	2013-04-22	NO
ythdc2 -/- #65	wild type #53	2013-04-22	2013-06-06	NO
ythdc2 -/- #66	wild type #53	2013-04-22	2013-06-06	NO
ythdc2 -/- #80	wild type #54	2013-04-15	2013-06-03	NO
ythdc2 -/- #83	wild type #54	2013-04-15	2013-06-03	NO
ythdc2 -/- #80	wild type #91	2013-06-03	2013-09-30	NO
ythdc2 -/- #83	wild type #91	2013-06-03	2013-09-30	NO
ythdc2 -/- #86	wild type #93	2013-06-03	2013-09-30	NO
ythdc2 -/- #89	wild type #93	2013-06-03	2013-09-30	NO
